# Supplementary material for: Serum-derived exosomes from non-viremic animals previously exposed to the porcine respiratory and reproductive virus contain antigenic viral proteins
Source: Springer Nature journal article supplement (doi:10.1186/s13567-016-0345-x), 2016-05-31

Sera NV-CN-V at 2nd Ab 1/100

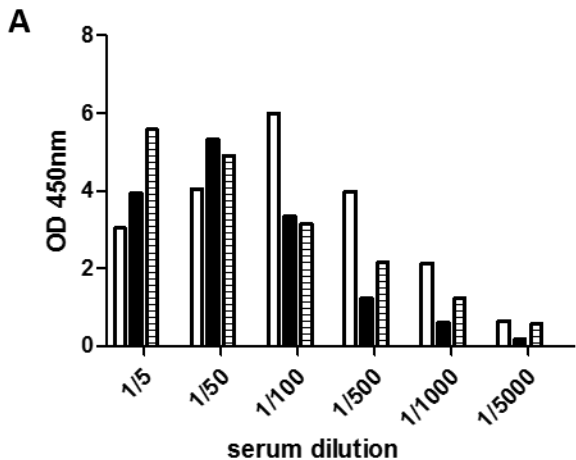

Sera NV-CN-V at 2nd Ab 1/1000

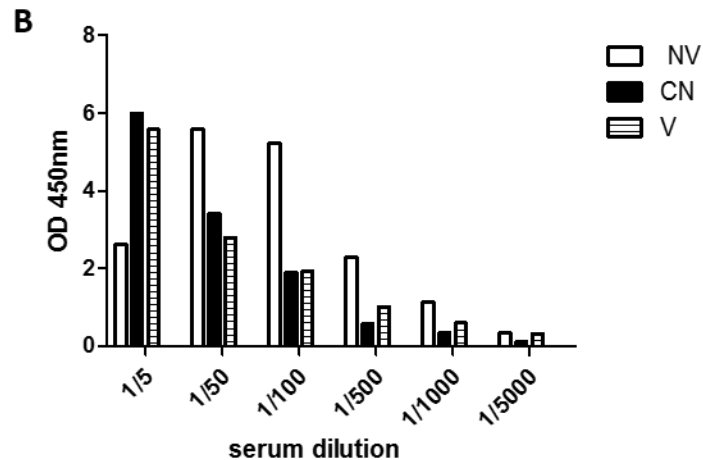

Sera NV-CN-V at 2nd Ab 1/10000

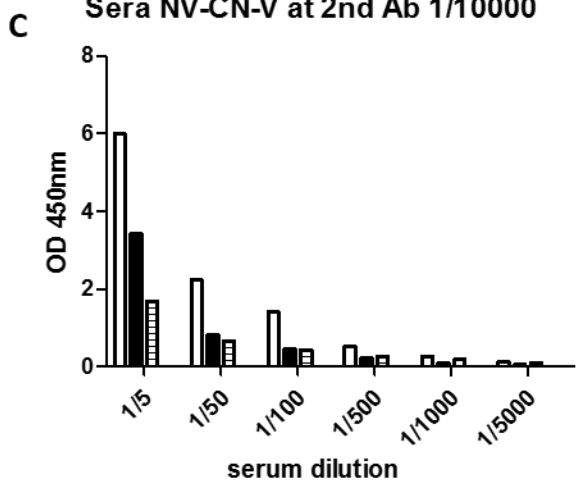

Sera NV-CN-V at 2nd Ab 1/100000

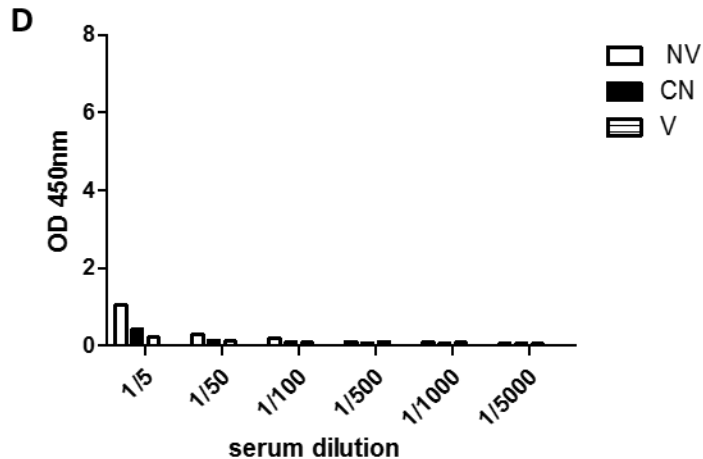

Supplement: MOESM2 [file 13567_2016_345_MOESM2_ESM.pdf]
