# Supplementary material for: Serum-derived exosomes from non-viremic animals previously exposed to the porcine respiratory and reproductive virus contain antigenic viral proteins
Source: Springer Nature journal article supplement (doi:10.1186/s13567-016-0345-x), 2016-05-31

**A** Viremic sample 201406-2PS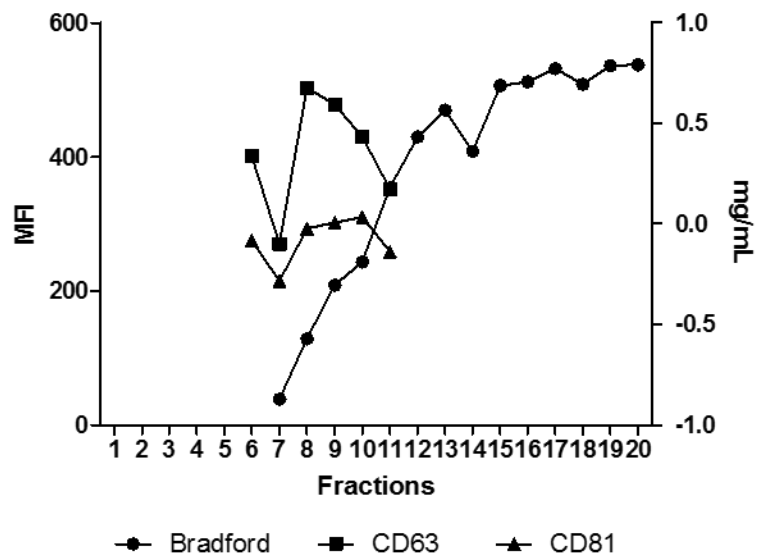**B** Naïve sample 201406-CN2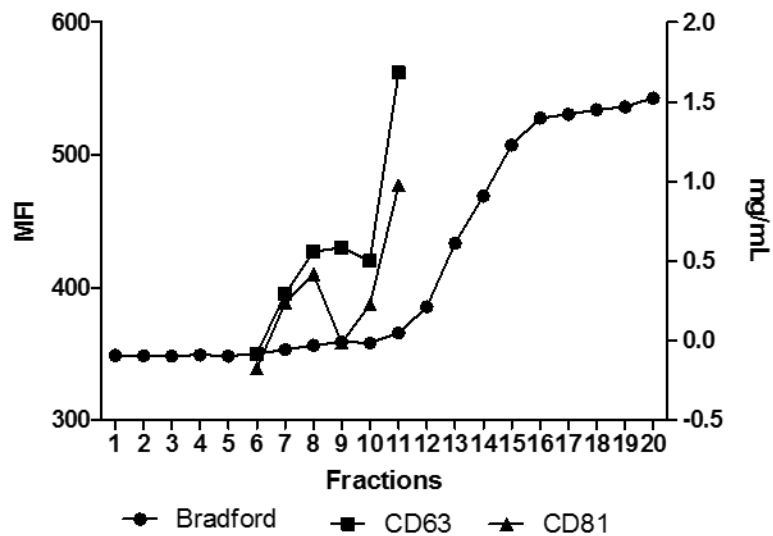**C**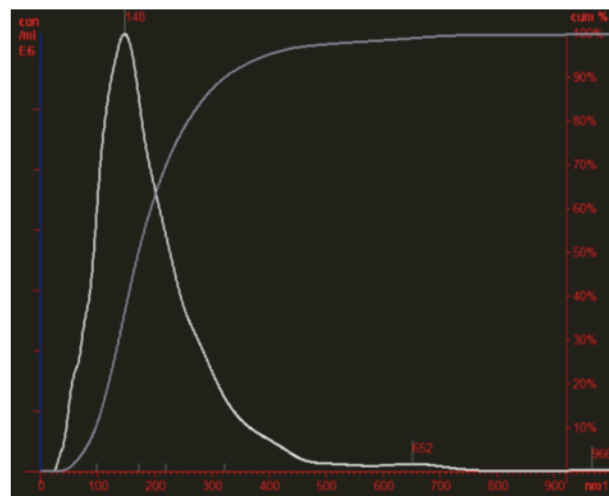**D**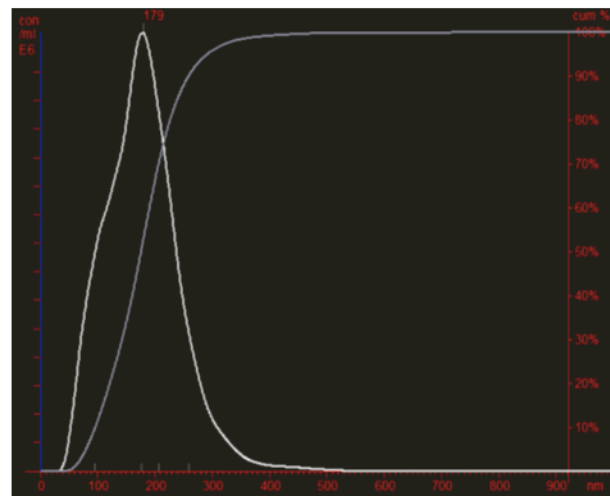

Supplement: MOESM3 [file 13567_2016_345_MOESM3_ESM.pdf]
