# Supplementary material for: Serum-derived exosomes from non-viremic animals previously exposed to the porcine respiratory and reproductive virus contain antigenic viral proteins
Source: Springer Nature journal article supplement (doi:10.1186/s13567-016-0345-x), 2016-05-31
Supplement: MOESM5 [file 13567_2016_345_MOESM5_ESM.pdf]

|                   |            |            |                |               |                   |
|-------------------|------------|------------|----------------|---------------|-------------------|
| Sus scrofa        |            |            |                |               |                   |
| Bos taurus        | 48 (2.9%)  |            |                |               |                   |
| Equus caballus    | 5 (2.5%)   | 18 (1.1%)  |                |               |                   |
| Gallus gallus     | 6 (2.8%)   | 35 (2.2%)  | 1 (0.8%)       |               |                   |
| Rattus norvegicus | 3 (0.2%)   | 6 (0.2%)   | 1 (0.1%)       | 0 (0.0%)      |                   |
|                   | Sus scrofa | Bos taurus | Equus caballus | Gallus gallus | Rattus norvegicus |
