# Supplementary material for: Serum-derived exosomes from non-viremic animals previously exposed to the porcine respiratory and reproductive virus contain antigenic viral proteins
Source: Vet Res. 2016 May 31;47:59. doi: 10.1186/s13567-016-0345-x (PMC4888503; doi:10.1186/s13567-016-0345-x)
Supplement: Supplementary file 1 — 10.1186/s13567-016-0345-x Codification and status of virus in blood and antibodies in porcine sera samples received. All samples were codified as soon as received in the laboratory and classified by virus and antibody status according to the RT-PCR and serology test for PRRSV. [file 13567_2016_345_MOESM1_ESM.xlsx]

## Sheet: Hoja1
ITSL ID Nº	ID from Farm	Date	RT-PCR	Antibody titer	Origin
201406-1PS	1	2014-06-09	+	1.8	Torreguitart
201406-2PS	2	2014-06-09	+	1.7	Torreguitart
201406-3PS	3	2014-06-09	+	1.8	Torreguitart
201406-4PS	4	2014-06-09	+	2.7	Torreguitart
201406-5PS	5	2014-06-09	+	0.7	Torreguitart
201406-6PS	6	2014-06-13	-	3.8	Corregó origin
201406-7PS	7	2014-06-13	-	4.8	Corregó origin
201406-8PS	8	2014-06-13	-	5.1	Corregó origin
201406-9PS	9	2014-06-13	-	2.3	Corregó origin
201406-10PS	10	2014-06-13	-	5.7	Corregó origin
201406-CN1	1	2014-07-10	-	-	Tecno-Aliment SL.
201406-CN2	2	2014-07-10	-	-	Tecno-Aliment SL
201411-1PS	1	30-10-2014	-	2.4	Corregó origin
201411-2PS	2	30-10-2014	-	2	Corregó origin
201411-3PS	3	30-10-2014	-	2.6	Corregó origin
201411-4PS	4	30-10-2014	-	2.9	Corregó origin
201411-5PS	5	30-10-2014	-	2.4	Corregó origin
201411-6PS	6	30-10-2014	-	0.7	Corregó origin
201411-7PS	7	30-10-2014	-	3.1	Corregó origin
201411-8PS	8	30-10-2014	-	3.3	Corregó origin
201411-9PS	9	30-10-2014	-	2.8	Corregó origin
201411-10PS	10	30-10-2014	+	3.2	Corregó origin
201411-11PS	11	30-10-2014	-	1.1	Corregó origin
201411-12PS	12	30-10-2014	-	2.1	Corregó origin
201411-13PS	13	30-10-2014	+	2.7	Corregó origin
201502-1PS	7	23-02-2015	(-)	2.5	Corregó origin
201502-2PS	8	23-02-2015	(-)	2.1	Corregó origin
201502-3PS	10	23-02-2015	(-)	3.1	Corregó origin
