# Supplementary material for: Serum-derived exosomes from non-viremic animals previously exposed to the porcine respiratory and reproductive virus contain antigenic viral proteins
Source: Vet Res. 2016 May 31;47:59. doi: 10.1186/s13567-016-0345-x (PMC4888503; doi:10.1186/s13567-016-0345-x)
Supplement: Supplementary file 4 — 10.1186/s13567-016-0345-x Sus scrofa proteins identified by Maxquant/Andromeda analysis using nanoLC-MS/MS spectra. Porcine proteins were identified in exosomes by proteomic analyses and several molecular markers of exosomes are present in these samples such as CD5, CD9, CD81 and CD63. [file 13567_2016_345_MOESM4_ESM.xlsx]

## Sheet: proteinGroups
Protein IDs	Majority protein IDs	Peptide counts (all)	Peptide counts (razor+unique)	Peptide counts (unique)	Fasta headers	Number of proteins	Peptides	Razor + unique peptides	Unique peptides	Sequence coverage [%]	Unique + razor sequence coverage [%]	Unique sequence coverage [%]	Mol. weight [kDa]	Sequence length	Sequence lengths	Q-value	Score	Intensity	iBAQ	LFQ intensity	MS/MS Count	MS/MS Count	Only identified by site	Reverse	Potential contaminant	id	Peptide IDs	Peptide is razor	Mod. peptide IDs	Evidence IDs	MS/MS IDs	Best MS/MS	Oxidation (M) site IDs	Oxidation (M) site positions
REV__gi|153791794;REV__gi|146741344	REV__gi|153791794;REV__gi|146741344	1;1	1;1	1;1	>gi|153791794|ref|NP_001093398.1| unconventional myosin-VIIa [Sus scrofa];>gi|146741344|dbj|BAF62327.1| myosin VIIA [Sus scrofa]	2	1	1	1	0	0	0	250.45	2177	2177;2177	1	-2	73266	NaN	199160	1	1	+	+		416	46	True	48	158	320	320	165	1249
REV__gi|311264951;REV__gi|545851202	REV__gi|311264951;REV__gi|545851202	1;1	1;1	1;1	>gi|311264951|ref|XP_003130415.1| PREDICTED: nicotinamide mononucleotide adenylyltransferase 2 isoform X1 [Sus scrofa];>gi|545851202|ref|XP_005667869.1| PREDICTED: nicotinamide mononucleotide adenylyltransferase 2 isoform X2 [Sus scrofa]	2	1	1	1	0	0	0	34.473	307	307;325	0.002994	6.9946	16755000	NaN	31540000	4	4		+		417	2060	True	2154	6986;6987;6988;6989	11081;11082;11083;11084	11081
REV__gi|545836813	REV__gi|545836813	1	1	1	>gi|545836813|ref|XP_003482159.2| PREDICTED: tyrosine-protein kinase receptor Tie-1 [Sus scrofa]	1	1	1	1	0	0	0	16.938	153	153	0.0052356	6.1249	8580100	NaN	10030000	4	4		+		418	1986	True	2079	6703;6704	10595;10596;10597;10598	10597
REV__gi|545842618;REV__gi|545842604	REV__gi|545842618;REV__gi|545842604	1;1	1;1	1;1	>gi|545842618|ref|XP_005656494.1| PREDICTED: sterile alpha motif domain-containing protein 15-like, partial [Sus scrofa];>gi|545842604|ref|XP_005656491.1| PREDICTED: LOW QUALITY PROTEIN: sterile alpha motif domain-containing protein 15 [Sus scrofa]	2	1	1	1	0	0	0	54.152	482	482;552	0.007732	6.0086	76789	NaN	208740	1	1		+		419	2462	True	2569	8416	13434	13434
gi|411147281;gi|1236646;gi|291202695;gi|253878;gi|164513;gi|73759925;gi|33150403;gi|291202696;gi|22652291;gi|411147282;CON__Q1RMK2	gi|411147281;gi|1236646;gi|291202695;gi|253878;gi|164513	27;27;25;22;22;13;3;3;3;3;1	27;27;25;22;22;13;3;3;3;3;1	24;24;24;21;21;13;0;0;0;0;1	>gi|411147281|dbj|BAM66301.1| IgM heavy chain constant region, partial [Sus scrofa];>gi|1236646|gb|AAC48775.1| ch4 and secrete domains of swine IgM, partial [Sus scrofa];>gi|291202695|dbj|BAI82566.1| IgM heavy chain constant region, partial [Sus scrofa];>g	11	27	27	24	80.9	80.9	68.8	49.282	455	455;455;404;403;403;220;291;378;379;400;597	0	323.31	11219000000	448740000	22175000000	1766	1766				80	145;146;324;450;602;603;608;747;800;804;805;823;1012;1362;1367;1471;1621;1768;1810;1879;2053;2068;2069;2396;2453;2491;2628	True;True;True;True;True;True;True;True;True;True;True;True;True;True;True;True;True;True;True;True;True;True;True;True;True;True;True	152;153;337;471;630;631;636;782;837;841;842;860;1057;1058;1416;1417;1422;1530;1696;1852;1853;1895;1967;2146;2162;2163;2500;2559;2601;2746	456;457;458;459;460;461;462;463;464;465;466;467;468;469;470;471;472;473;474;475;476;477;478;479;480;481;482;483;484;485;486;487;488;489;490;491;492;493;494;495;496;497;498;499;500;501;502;503;504;505;506;507;508;509;510;511;512;513;514;515;516;517;518;519;520;521;522;523;524;525;526;527;528;529;530;531;532;533;534;535;536;537;538;539;540;541;542;543;544;545;546;547;548;549;550;551;552;553;554;555…	764;765;766;767;768;769;770;771;772;773;774;775;776;777;778;779;780;781;782;783;784;785;786;787;788;789;790;791;792;793;794;795;796;797;798;799;800;801;802;803;804;805;806;807;808;809;810;811;812;813;814;815;816;817;818;819;820;821;822;823;824;825;826;827;828;829;830;831;832;833;834;835;836;837;838;839;840;841;842;843;844;845;846;847;848;849;850;851;852;853;854;855;856;857;858;859;860;861;862;863…	1108;1112;2097;2754;3514;3517;3555;4190;4498;4619;4630;4853;5740;7364;7440;7991;8878;9484;9668;10035;10948;11185;11212;12984;13354;13737;14629	37;38;39	148;181;328
gi|164511;gi|89216;gi|125947	gi|164511;gi|89216;gi|125947	9;8;6	9;8;6	2;2;0	>gi|164511|gb|AAA03572.1| immunoglobulin lambda-chain, partial [Sus scrofa];>gi|89216|pir||PT0220 Ig lambda chain V-C region PLC3 - pig (fragment);>gi|125947|sp|P01846.1|LAC_PIG RecName: Full=Ig lambda chain C region	3	9	9	2	81.8	81.8	23.2	19.103	181	181;181;105	0	196.47	3566700000	324240000	6413300000	397	397				115	10;63;194;195;731;1708;2043;2243;2541	True;True;True;True;True;True;True;True;True	10;66;201;202;766;1790;2136;2342;2652	19;20;21;22;23;24;25;26;27;28;29;30;31;32;33;34;35;36;37;205;206;207;208;209;210;211;212;213;214;215;216;217;218;219;776;777;778;779;780;781;782;783;784;785;786;787;788;789;790;791;792;793;794;795;796;797;798;799;2537;2538;2539;2540;2541;2542;2543;2544;2545;2546;5826;6867;6868;6869;6870;6871;6872;6873;6874;6875;6876;6877;6878;6879;6880;6881;6882;7571;7572;7573;7574;8736;8737;8738;8739;8740;8741;8…	26;27;28;29;30;31;32;33;34;35;36;37;38;39;40;41;42;43;44;45;46;47;48;49;50;51;52;53;54;55;56;57;58;59;60;61;62;63;64;65;66;67;68;69;70;71;72;73;74;75;76;77;78;79;80;81;82;83;84;85;86;87;88;89;90;91;92;93;94;395;396;397;398;399;400;401;402;403;404;405;406;407;408;409;410;411;412;413;414;415;416;417;418;419;420;421;422;423;424;425;426;427;428;429;430;431;432;433;434;435;436;437;438;439;440;441;442;…	51;408;1252;1306;4059;9218;10842;12001;14066
gi|75059260;gi|47523126;gi|1228924;gi|163867303	gi|75059260;gi|47523126;gi|1228924	14;14;14;2	14;14;14;2	9;9;9;1	>gi|75059260|sp|Q29041.1|FCN2_PIG RecName: Full=Ficolin-2; AltName: Full=Collagen/fibrinogen domain-containing protein 2; AltName: Full=Ficolin-B; AltName: Full=Ficolin-beta; AltName: Full=L-ficolin; Flags: Precursor;>gi|47523126|ref|NP_999033.1| ficolin-2	4	14	14	9	61.6	61.6	49.8	34.681	323	323;323;323;58	0	188.89	3264500000	251120000	6770800000	273	273				78	398;817;844;971;1840;1871;1895;1928;1929;2289;2482;2483;2591;2600	True;True;True;True;True;True;True;True;True;True;True;True;True;True	415;854;883;1015;1927;1959;1983;2019;2020;2390;2592;2593;2706;2715;2716	1545;1546;1547;1548;2930;2931;2932;2933;2934;2935;2936;2937;2938;2939;2940;2941;2942;3111;3112;3113;3114;3115;3425;3426;3427;3428;3429;3430;3431;6238;6239;6240;6241;6242;6243;6244;6245;6361;6362;6363;6364;6365;6416;6417;6418;6419;6420;6421;6422;6423;6424;6545;6546;6547;6548;6549;6550;6551;6552;6553;6554;7833;7834;7835;7836;7837;7838;7839;7840;7841;7842;7843;7844;7845;7846;7847;7848;7849;7850;7851…	2458;2459;2460;2461;2462;4693;4694;4695;4696;4697;4698;4699;4700;4701;4702;4703;4704;4705;4706;4707;4708;4709;4710;4711;4712;4713;4714;4715;4716;4717;4718;4719;4720;4721;4722;4723;4724;4725;4726;4727;4728;4729;4730;4731;4732;4733;4734;4735;4736;4737;4972;4973;4974;4975;4976;4977;5433;5434;5435;5436;5437;5438;5439;5440;5441;5442;5443;5444;5445;5446;5447;9832;9833;9834;9835;9836;9837;9838;9839;9840…	2462;4695;4972;5443;9837;10019;10103;10348;10354;12461;13644;13646;14361;14410	35	230
gi|559775234	gi|559775234	7	7	4	>gi|559775234|gb|AHB17990.1| immunoglobulin light chain constant region, partial [Sus scrofa]	1	7	7	4	93.6	93.6	52.3	12.087	109	109	0	123.91	980970000	196190000	1760000000	184	184				404	21;420;595;1830;1927;2162;2283	True;True;True;True;True;True;True	21;439;623;1917;2018;2258;2384	62;63;64;65;66;67;68;69;70;71;72;73;74;75;76;77;78;79;80;81;1601;1602;1603;1604;1605;1606;1607;1608;2164;2165;2166;2167;2168;2169;2170;2171;2172;2173;2174;6203;6543;6544;7323;7324;7325;7326;7812;7813;7814;7815;7816;7817;7818;7819;7820;7821	136;137;138;139;140;141;142;143;144;145;146;147;148;149;150;151;152;153;154;155;156;157;158;159;160;161;162;163;164;165;166;167;168;169;170;171;172;173;174;175;176;177;178;179;180;181;182;183;184;185;186;187;188;189;190;191;192;193;194;195;196;197;198;199;200;201;202;203;204;205;206;2534;2535;2536;2537;2538;2539;2540;2541;2542;2543;2544;2545;2546;2547;2548;2549;2550;2551;2552;2553;2554;2555;2556;…	137;2542;3492;9783;10328;11642;12417
gi|809285;gi|809283;gi|5542425;gi|5542423;gi|402550456;gi|402550453;gi|402550450;gi|402550447;gi|806381;gi|3041678;gi|261245058;gi|120564455;gi|229344;gi|229343;gi|223958;gi|223757;gi|223756;gi|122784;gi|854618;gi|47523946;gi|3041679	gi|809285;gi|809283;gi|5542425;gi|5542423;gi|402550456;gi|402550453;gi|402550450;gi|402550447;gi|806381;gi|3041678;gi|261245058;gi|120564455	11;11;11;11;9;9;9;9;9;9;9;8;1;1;1;1;1;1;1;1;1	11;11;11;11;9;9;9;9;9;9;9;8;1;1;1;1;1;1;1;1;1	10;10;10;10;8;8;8;8;8;8;8;7;1;1;1;0;0;0;0;0;0	>gi|809285|pdb|2PGH|D Chain D, Structure Determination Of Aquomet Porcine Hemoglobin At 2.8 Angstrom Resolution;>gi|809283|pdb|2PGH|B Chain B, Structure Determination Of Aquomet Porcine Hemoglobin At 2.8 Angstrom Resolution;>gi|5542425|pdb|1QPW|D Chain D,	21	11	11	10	78.8	78.8	71.9	16.035	146	146;146;146;146;146;146;146;146;147;147;147;126;10;10;32;146;146;146;147;147;147	0	190	793840000	79384000	1179300000	216	216				403	470;676;1252;1344;1425;1499;1853;2362;2401;2418;2480	True;True;True;True;True;True;True;True;True;True;True	493;705;706;1303;1398;1481;1559;1940;2465;2505;2523;2590	1787;1788;1789;1790;1791;2368;2369;2370;2371;2372;2373;2374;2375;2376;2377;2378;2379;2380;4260;4261;4262;4532;4533;4534;4535;4536;4537;4538;4539;4540;4541;4871;4872;4873;4874;5073;5074;5075;5076;5077;5078;5079;5080;5081;5082;5083;5084;5085;5086;6280;6281;6282;6283;6284;6285;6286;8080;8081;8082;8196;8197;8198;8199;8200;8201;8202;8203;8251;8252;8253;8254;8507;8508;8509;8510;8511;8512;8513;8514;8515…	2857;2858;2859;2860;2861;2862;2863;2864;2865;2866;2867;2868;2869;2870;2871;2872;2873;2874;2875;2876;2877;3783;3784;3785;3786;3787;3788;3789;3790;3791;3792;3793;3794;3795;3796;3797;3798;3799;3800;3801;3802;6821;6822;6823;6824;6825;7245;7246;7247;7248;7249;7250;7251;7252;7253;7254;7255;7256;7257;7258;7259;7260;7261;7262;7263;7264;7265;7266;7267;7268;7808;7809;7810;7811;7812;7813;7814;7815;7816;7817…	2857;3788;6821;7255;7816;8110;9902;12862;13051;13175;13604	164	55
gi|441477573;gi|411147297;gi|411147291	gi|441477573;gi|411147297;gi|411147291	15;13;13	15;13;13	1;1;1	>gi|441477573|dbj|BAM75542.1| IgG heavy chain precursor [Sus scrofa];>gi|411147297|dbj|BAM66315.1| IgG heavy chian constant region, partial [Sus scrofa];>gi|411147291|dbj|BAM66310.1| IgG heavy chian constant region, partial [Sus scrofa]	3	15	15	1	52.7	52.7	6.6	49.533	455	455;323;323	0	215.27	1049600000	58311000	1787100000	224	224				310	248;306;366;427;583;793;1198;1535;2004;2095;2207;2234;2285;2447;2492	True;True;True;True;True;True;True;True;True;True;True;True;True;True;True	258;317;379;446;447;611;829;1249;1600;2097;2189;2305;2333;2386;2553;2602	1091;1092;1093;1094;1095;1096;1097;1098;1231;1232;1233;1234;1434;1634;1635;1636;1637;1638;1639;2123;2124;2125;2786;2787;2788;2789;4119;4120;4121;4122;5200;5201;5202;5203;5204;5205;5206;5207;5208;5209;5210;5211;5212;5213;5214;5215;5216;5217;5218;5219;5220;5221;5222;5223;5224;5225;5226;5227;5228;5229;5230;5231;5232;5233;5234;5235;5236;5237;5238;5239;5240;5241;5242;5243;5244;5245;5246;5247;5248;5249…	1770;1771;1772;1773;1774;1775;1776;1777;1992;1993;1994;1995;2279;2601;2602;2603;2604;2605;2606;2607;2608;3374;3375;3376;4448;4449;4450;4451;4452;4453;6597;6598;6599;6600;8298;8299;8300;8301;8302;8303;8304;8305;8306;8307;8308;8309;8310;8311;8312;8313;8314;8315;8316;8317;8318;8319;8320;8321;8322;8323;8324;8325;8326;8327;8328;8329;8330;8331;8332;8333;8334;8335;8336;8337;8338;8339;8340;8341;8342;8343…	1773;1994;2279;2604;3375;4449;6598;8300;10665;11315;11839;11947;12442;13311;13757	46	258
gi|809284;gi|809282;gi|5542424;gi|5542422;gi|402550455;gi|402550452;gi|402550449;gi|402550446;gi|229626;gi|122465;gi|350581842;CON__P01966;gi|223758;gi|122338;gi|350581862;gi|350581838	gi|809284;gi|809282;gi|5542424;gi|5542422;gi|402550455;gi|402550452;gi|402550449;gi|402550446;gi|229626;gi|122465;gi|350581842	8;8;8;8;8;8;8;8;8;8;8;2;1;1;1;1	8;8;8;8;8;8;8;8;8;8;8;2;1;1;1;1	8;8;8;8;8;8;8;8;8;8;8;2;1;1;1;1	>gi|809284|pdb|2PGH|C Chain C, Structure Determination Of Aquomet Porcine Hemoglobin At 2.8 Angstrom Resolution;>gi|809282|pdb|2PGH|A Chain A, Structure Determination Of Aquomet Porcine Hemoglobin At 2.8 Angstrom Resolution;>gi|5542424|pdb|1QPW|C Chain C,	16	8	8	8	85.1	85.1	85.1	15.039	141	141;141;141;141;141;141;141;141;141;141;142;142;141;141;142;142	0	106.38	495810000	55090000	713290000	95	95				77	206;694;1418;1575;2248;2292;2349;2402	True;True;True;True;True;True;True;True	213;725;1474;1642;1643;2347;2393;2452;2506	819;820;821;822;823;824;825;826;827;828;829;2430;2431;2432;2433;4852;4853;4854;4855;4856;4857;4858;4859;5354;5355;5356;5357;5358;5359;5360;5361;7583;7584;7585;7586;7587;7588;7589;7590;7591;7592;7593;7594;7860;8034;8035;8036;8037;8038;8039;8040;8041;8204	1336;1337;1338;1339;1340;1341;1342;1343;1344;1345;1346;1347;1348;1349;1350;1351;1352;1353;3866;3867;3868;3869;3870;3871;3872;3873;3874;3875;3876;7787;7788;7789;7790;7791;7792;7793;7794;7795;8546;8547;8548;8549;8550;8551;8552;8553;8554;8555;8556;8557;8558;8559;12018;12019;12020;12021;12022;12023;12024;12025;12026;12027;12028;12029;12030;12031;12032;12033;12034;12035;12036;12037;12038;12039;12040;1…	1338;3871;7790;8552;12033;12523;12793;13069	34	32
gi|350538075;gi|334191724;gi|2981067;gi|12230718;gi|347668499;gi|7544969;gi|1769554;gi|7579909	gi|350538075;gi|334191724;gi|2981067;gi|12230718	105;105;103;103;19;18;13;7	105;105;103;103;19;18;13;7	105;105;103;103;19;18;13;7	>gi|350538075|ref|NP_001233150.1| von Willebrand factor precursor [Sus scrofa];>gi|334191724|tpg|DAA34811.1| TPA_inf: von Willebrand factor [Sus scrofa];>gi|2981067|gb|AAC06229.1| von Willebrand factor precursor, partial [Sus scrofa];>gi|12230718|sp|Q28833	8	105	105	105	48.8	48.8	48.8	308	2807	2807;2807;2482;2482;416;414;237;157	0	323.31	6470800000	49775000	13519000000	1877	1877				211	43;56;137;144;210;213;256;257;259;263;311;312;332;377;422;467;482;489;490;521;586;588;638;691;713;795;815;832;894;914;952;955;1000;1006;1015;1021;1047;1066;1117;1121;1127;1137;1171;1238;1239;1247;1248;1253;1256;1259;1287;1390;1391;1497;1521;1532;1592;1593;1609;1615;1665;1813;1823;1834;1847;1849;1854;1902;1989;2051;2066;2097;2103;2119;2160;2191;2197;2200;2215;2225;2226;2266;2269;2270;2271;2272;227…	True;True;True;True;True;True;True;True;True;True;True;True;True;True;True;True;True;True;True;True;True;True;True;True;True;True;True;True;True;True;True;True;True;True;True;True;True;True;True;True;True;True;True;True;True;True;True;True;True;True;True;True;True;True;True;True;True;True;True;True;True;True;True;True;True;True;True;True;True;True;True;True;True;True;True;True;True;True;True;True…	45;59;143;144;151;217;220;266;267;269;270;274;323;324;345;390;441;490;505;512;513;514;515;546;614;616;667;722;746;831;852;869;870;933;934;956;994;995;998;1045;1051;1061;1067;1095;1096;1115;1167;1171;1178;1188;1222;1289;1290;1298;1299;1304;1305;1308;1311;1340;1445;1446;1557;1585;1597;1661;1662;1663;1664;1681;1682;1689;1690;1742;1898;1899;1910;1921;1934;1936;1941;1942;1992;2082;2144;2160;2191;2197;…	152;153;154;155;184;185;186;187;188;189;190;191;192;426;427;428;429;430;431;432;433;452;453;454;455;833;834;835;836;837;838;839;840;841;842;843;844;845;846;847;848;849;850;851;852;853;854;855;856;857;858;859;860;861;862;863;864;865;866;867;868;869;870;871;872;873;874;875;876;877;878;879;880;881;882;883;884;885;886;887;888;889;890;891;892;893;894;895;896;897;898;899;900;901;902;903;904;905;906;907…	306;307;308;309;310;311;312;313;314;315;316;317;355;356;357;358;359;360;361;362;363;364;365;366;367;368;369;370;371;372;373;374;375;718;719;720;721;722;723;724;725;726;727;728;729;730;731;751;752;753;754;755;756;757;758;759;760;761;762;763;1357;1358;1359;1360;1361;1362;1363;1364;1365;1366;1367;1368;1369;1370;1371;1372;1373;1374;1375;1376;1377;1378;1379;1380;1381;1382;1383;1384;1385;1386;1387;1388…	311;361;731;756;1399;1600;1788;1793;1814;1834;2017;2021;2177;2335;2567;2840;2938;2980;2996;3131;3387;3399;3663;3852;3954;4481;4678;4925;5157;5235;5362;5372;5556;5616;5752;5776;5954;6027;6228;6256;6295;6333;6456;6713;6722;6800;6804;6844;6871;6888;7046;7629;7649;8100;8228;8284;8619;8634;8693;8843;9071;9702;9760;9810;9870;9889;9905;10216;10612;10933;11099;11324;11350;11433;11624;11743;11792;11804;11…	79;80;81;82;83;84;85;86;87;88;89;90;91;92;93;94;95;96;97;98	941;1050;1054;1298;1299;1380;1489;1600;1613;1630;1741;1755;1776;2091;2116;2455;2600;2630;2653;2776
gi|335293621	gi|335293621	6	6	6	>gi|335293621|ref|XP_003357009.1| PREDICTED: immunoglobulin J chain isoform 1 [Sus scrofa]	1	6	6	6	60.1	60.1	60.1	18.001	158	158	0	87.624	286730000	47788000	498030000	69	69				224	283;1113;1197;1610;1881;2194	True;True;True;True;True;True	294;1162;1248;1683;1684;1969;2292	1177;1178;1179;1180;1181;1182;1183;1184;3866;3867;3868;3869;4117;4118;5537;5538;5539;5540;5541;5542;6379;6380;6381;6382;6383;7411;7412;7413;7414;7415;7416;7417;7418;7419;7420	1906;1907;1908;1909;1910;1911;1912;1913;1914;1915;1916;1917;1918;1919;1920;1921;1922;1923;6194;6195;6196;6197;6198;6199;6200;6201;6202;6203;6204;6205;6595;6596;8821;8822;8823;8824;8825;8826;8827;10041;10042;10043;10044;10045;10046;10047;10048;10049;10050;10051;10052;11760;11761;11762;11763;11764;11765;11766;11767;11768;11769;11770;11771;11772;11773;11774;11775;11776;11777;11778	1916;6194;6596;8826;10052;11769	102	145
gi|456752927	gi|456752927	20	20	20	>gi|456752927|gb|JAA74057.1| lectin, galactoside-binding, soluble, 3 binding protein [Sus scrofa]	1	20	20	20	56.7	56.7	56.7	61.048	552	552	0	320.03	741950000	35331000	981610000	208	208				326	95;108;116;149;396;479;718;780;960;1078;1246;1270;1372;1913;1953;1976;2177;2221;2309;2470	True;True;True;True;True;True;True;True;True;True;True;True;True;True;True;True;True;True;True;True	98;111;112;120;121;156;413;502;752;816;1003;1127;1297;1323;1427;2003;2045;2068;2069;2273;2320;2410;2579;2580	306;307;308;309;310;311;312;313;338;339;340;341;342;362;363;364;365;366;367;368;369;370;371;372;665;666;667;668;669;670;671;1540;1541;1542;1820;1821;1822;2499;2500;2501;2502;2503;2755;2756;2757;2758;2759;2760;2761;2762;3397;3398;3399;3400;3401;3402;3403;3794;3795;3796;3797;4237;4346;4347;4348;4349;4692;4693;4694;4695;4696;4697;4698;4699;4700;4701;6496;6497;6498;6499;6500;6601;6602;6603;6604;6668;…	569;570;571;572;573;574;575;576;577;578;579;580;616;617;618;619;620;621;622;646;647;648;649;650;651;652;653;654;655;656;657;658;659;1116;1117;1118;1119;1120;1121;1122;1123;1124;1125;2453;2454;2455;2925;2926;2927;3984;3985;3986;3987;3988;3989;3990;3991;3992;3993;3994;3995;3996;3997;3998;3999;4000;4001;4002;4003;4004;4005;4399;4400;4401;4402;4403;4404;4405;4406;4407;4408;4409;4410;4411;4412;4413;44…	570;617;650;1117;2453;2925;3994;4402;5405;6084;6792;6946;7560;10264;10426;10542;11692;11883;12610;13488	119;120;121;122	87;109;194;491
gi|21703165	gi|21703165	4	4	2	>gi|21703165|gb|AAM76080.1|AF334742_1 immunoglobulin kappa light chain VJ region, partial [Sus scrofa]	1	4	4	2	54.5	54.5	35.7	12.127	112	112	0	75.61	257830000	32229000	470040000	45	45				159	93;750;1378;1725	True;True;True;True	96;785;1433;1809	295;296;297;298;299;300;301;302;2673;2674;2675;2676;2677;2678;2679;4713;4714;5881;5882;5883;5884	544;545;546;547;548;549;550;551;552;553;554;555;556;557;558;559;560;561;562;4277;4278;4279;4280;4281;4282;4283;4284;4285;4286;4287;4288;4289;4290;4291;4292;4293;4294;4295;7578;7579;7580;9305;9306;9307;9308	545;4287;7579;9308
gi|545822519;gi|343478265	gi|545822519;gi|343478265	16;16	16;16	16;16	>gi|545822519|ref|XP_005663294.1| PREDICTED: CD5 molecule-like isoform X1 [Sus scrofa];>gi|343478265|ref|NP_001230397.1| CD5 antigen-like precursor [Sus scrofa]	2	16	16	16	42	42	42	48.906	445	445;552	0	187.61	463400000	23170000	896020000	168	168				236	76;231;274;487;557;765;766;811;946;1184;1539;1778;1970;2322;2533;2534	True;True;True;True;True;True;True;True;True;True;True;True;True;True;True;True	79;238;285;510;583;800;801;848;988;1235;1604;1863;2062;2423;2644;2645	242;243;244;245;246;247;1028;1029;1030;1031;1032;1033;1034;1161;1162;1163;1164;1845;1846;2055;2716;2717;2718;2719;2720;2721;2722;2723;2724;2906;2907;2908;3357;3358;3359;3360;4080;4081;4082;4083;5281;5282;5283;5284;6029;6030;6031;6032;6033;6034;6035;6655;6656;6657;6658;7959;8709;8710;8711;8712;8713;8714;8715;8716;8717;8718;8719;8720;8721	468;469;470;471;472;473;474;475;476;477;478;479;480;481;482;1660;1661;1662;1663;1664;1665;1666;1667;1668;1669;1670;1884;1885;1886;1887;1888;1889;1890;1891;1892;1893;2972;2973;3274;4348;4349;4350;4351;4352;4353;4354;4355;4356;4357;4358;4359;4360;4361;4362;4363;4364;4365;4653;4654;4655;4656;4657;5332;5333;5334;5335;5336;5337;5338;5339;5340;5341;5342;5343;6534;6535;6536;6537;6538;6539;6540;6541;6542…	474;1662;1884;2973;3274;4358;4364;4656;5333;6535;8442;9536;10514;12675;13956;13974
gi|47522716;gi|416625;gi|164363;gi|5565904	gi|47522716;gi|416625;gi|164363;gi|5565904	12;12;12;11	7;7;7;6	3;3;3;3	>gi|47522716|ref|NP_999107.1| apolipoprotein R precursor [Sus scrofa];>gi|416625|sp|Q03472.1|APOR_PIG RecName: Full=Apolipoprotein R; Short=Apo-R; Flags: Precursor;>gi|164363|gb|AAA30994.1| apolipoprotein R [Sus scrofa];>gi|5565904|gb|AAD45257.1| apolipopr	4	12	7	3	61.9	40.6	24.8	22.724	202	202;202;202;188	0	101.13	227180000	22718000	599970000	82	82				109	97;236;245;246;1109;1201;1274;1398;1399;1428;1519;2527	True;False;False;False;True;False;False;True;True;True;True;True	100;243;255;256;1158;1252;1327;1453;1454;1484;1485;1583;2638	316;317;1045;1046;1081;1082;1083;1084;1085;1086;1087;1088;1089;3851;3852;3853;3854;3855;3856;3857;3858;3859;4126;4127;4360;4361;4770;4771;4772;4773;4774;4881;4882;4883;4884;4885;4886;5139;5140;5141;8690;8691;8692;8693	583;584;585;1693;1694;1695;1696;1697;1698;1699;1700;1701;1742;1743;1744;1745;1746;1747;1748;1749;1750;1751;1752;1753;1754;1755;1756;1757;1758;1759;1760;1761;1762;1763;1764;1765;1766;1767;1768;6154;6155;6156;6157;6158;6159;6160;6161;6162;6163;6164;6165;6166;6167;6168;6169;6170;6171;6172;6173;6174;6175;6176;6177;6178;6179;6180;6181;6182;6183;6184;6185;6186;6187;6604;6605;6606;6607;6608;6609;6610;66…	585;1693;1751;1768;6185;6608;6985;7664;7674;7834;8202;13924	47	161
gi|54035680;gi|51491906;gi|38455782	gi|54035680;gi|51491906;gi|38455782	5;5;5	5;5;5	5;5;5	>gi|54035680|sp|Q69DL0.1|C1QA_PIG RecName: Full=Complement C1q subcomponent subunit A; Flags: Precursor;>gi|51491906|ref|NP_001003924.1| complement C1q subcomponent subunit A precursor [Sus scrofa];>gi|38455782|gb|AAR20892.1| complement C1qA [Sus scrofa]	3	5	5	5	33.6	33.6	33.6	26.483	247	247;247;247	0	137.51	256370000	19720000	357610000	55	55				289	404;882;1191;1793;1856	True;True;True;True;True	421;921;1242;1878;1944	1555;1556;1557;1558;1559;3189;3190;3191;3192;3193;3194;3195;4099;4100;4101;4102;4103;4104;4105;4106;6077;6078;6079;6080;6081;6082;6083;6294;6295	2469;2470;2471;2472;2473;2474;2475;2476;2477;5074;5075;5076;5077;5078;5079;5080;5081;5082;5083;5084;5085;5086;5087;6566;6567;6568;6569;6570;6571;6572;6573;6574;6575;6576;6577;6578;6579;6580;6581;6582;9595;9596;9597;9598;9599;9600;9601;9602;9603;9604;9605;9606;9913;9914;9915	2469;5077;6579;9600;9914
CON__P13645;gi|545858131;gi|311267330;CON__P02535-1;CON__Q7Z3Y7;CON__Q148H6;CON__P05784;gi|545858172;CON__Q7Z3Z0;CON__Q7Z3Y8;gi|347543772;gi|311267334;CON__Q2M2I5;gi|545858027;gi|349585237;CON__A2A5Y0;gi|311267324;CON__Q92764;gi|350590325;CON__Q14532;gi|350590334;CON__A2AB72;gi|350590327;CON__Q497I4;CON__O76015;gi|335297667;gi|311267256;CON__O76013;CON__Q7Z3Y9;CON__O76014;CON__REFSEQ:XP_986630;gi…	CON__P13645	32;13;13;8;4;3;2;2;2;2;2;2;2;1;1;1;1;1;1;1;1;1;1;1;1;1;1;1;1;1;1;1;1	32;13;13;8;4;3;2;2;2;2;2;2;2;1;1;1;1;1;1;1;1;1;1;1;1;1;1;1;1;1;1;1;1	26;7;7;5;2;1;0;0;1;1;1;0;0;0;0;0;0;0;0;0;0;0;0;0;0;0;0;0;0;0;0;0;0	>P13645 SWISS-PROT:P13645 Tax_Id=9606 Gene_Symbol=KRT10 Keratin, type I cytoskeletal 10	33	32	32	26	59.5	59.5	52.1	59.51	593	593;573;613;570;486;464;423;441;450;459;460;484;525;404;414;416;416;425;435;448;452;453;455;455;456;459;460;467;468;471;476;494;494	0	323.31	511800000	19685000	1187400000	269	269			+	10	26;27;49;104;284;567;938;941;1151;1199;1265;1281;1317;1641;1689;1718;1721;1806;1809;1855;1877;1908;1909;1941;1980;2024;2025;2143;2387;2471;2549;2565	True;True;True;True;True;True;True;True;True;True;True;True;True;True;True;True;True;True;True;True;True;True;True;True;True;True;True;True;True;True;True;True	26;27;28;51;107;295;595;980;983;1202;1250;1317;1334;1371;1717;1718;1769;1800;1803;1804;1805;1891;1894;1943;1965;1998;1999;2032;2073;2117;2118;2239;2491;2581;2662;2678	100;101;102;103;104;105;106;107;108;109;110;111;112;113;114;115;116;117;118;164;165;166;167;168;169;331;332;333;334;1185;1186;1187;1188;1189;2077;2078;2079;2080;2081;2082;2083;3331;3332;3333;3334;3335;3340;3341;3342;3343;3344;3345;3981;3982;3983;4123;4124;4328;4329;4330;4331;4371;4372;4373;4374;4457;4458;4459;4460;4461;4462;5638;5639;5640;5641;5642;5643;5644;5762;5763;5764;5765;5766;5767;5849;585…	235;236;237;238;239;240;241;242;243;244;245;246;247;248;249;250;251;252;253;254;255;256;257;258;259;260;261;262;263;264;265;266;267;326;327;328;329;330;331;332;333;334;335;603;604;605;606;607;608;609;610;611;612;1924;1925;1926;1927;1928;1929;1930;3300;3301;3302;3303;3304;3305;3306;3307;3308;3309;3310;5295;5296;5297;5298;5299;5300;5301;5302;5307;5308;5309;5310;5311;5312;6370;6371;6372;6373;6601;66…	235;267;328;605;1926;3303;5296;5308;6371;6601;6915;7006;7145;8963;9133;9262;9285;9641;9659;9912;10030;10255;10258;10379;10559;10750;10757;11534;12936;13498;14166;14241	11;12;13;14	271;291;306;321
gi|41323523;gi|41323539	gi|41323523;gi|41323539	3;3	2;2	0;0	>gi|41323523|gb|AAR99919.1| immunoglobulin kappa variable region, partial [Sus scrofa];>gi|41323539|gb|AAR99927.1| immunoglobulin kappa variable region, partial [Sus scrofa]	2	3	2	0	30.2	20.2	0	14.005	129	129;131	0	32.095	111930000	18655000	198670000	19	19				297	750;2040;2298	False;True;True	785;2133;2399	2673;2674;2675;2676;2677;2678;2679;6858;6859;6860;6861;6862;7878;7879;7880;7881	4277;4278;4279;4280;4281;4282;4283;4284;4285;4286;4287;4288;4289;4290;4291;4292;4293;4294;4295;10806;10807;10808;10809;10810;10811;10812;10813;10814;10815;10816;10817;10818;12560;12561;12562;12563;12564;12565	4287;10814;12561
gi|441477575;gi|411147289;gi|411147286;gi|433128;gi|2136515;gi|441477579;gi|164505;gi|571397;gi|2136536;gi|119662895	gi|441477575;gi|411147289;gi|411147286;gi|433128;gi|2136515;gi|441477579;gi|164505	15;12;12;12;12;12;10;3;3;2	12;10;10;10;10;9;8;2;2;1	0;0;0;0;0;0;0;0;0;0	>gi|441477575|dbj|BAM75543.1| IgG heavy chain precursor [Sus scrofa];>gi|411147289|dbj|BAM66308.1| IgG heavy chian constant region, partial [Sus scrofa];>gi|411147286|dbj|BAM66306.1| IgG heavy chian constant region, partial [Sus scrofa];>gi|433128|gb|AAA52	10	15	12	0	55.7	46.9	0	51.125	469	469;327;327;328;328;465;328;146;146;125	0	191.46	350340000	18439000	643310000	136	136				311	389;426;529;581;1482;1535;2004;2080;2095;2156;2233;2417;2478;2493;2511	True;True;True;True;True;False;False;True;False;True;True;True;True;True;True	405;406;445;554;609;1541;1600;2097;2174;2189;2252;2332;2522;2588;2603;2621	1507;1508;1509;1510;1511;1512;1513;1514;1515;1516;1517;1518;1519;1520;1624;1625;1626;1627;1628;1629;1630;1631;1632;1633;1971;1972;2112;2113;2114;2115;5032;5033;5200;5201;5202;5203;5204;5205;5206;5207;5208;5209;5210;5211;5212;5213;5214;5215;5216;5217;5218;5219;5220;5221;5222;5223;5224;5225;5226;5227;5228;5229;5230;5231;5232;5233;5234;5235;5236;5237;5238;5239;5240;5241;5242;5243;5244;5245;5246;5247…	2398;2399;2400;2401;2402;2403;2404;2405;2406;2407;2408;2409;2410;2411;2412;2413;2414;2415;2416;2417;2418;2419;2420;2421;2422;2423;2424;2425;2588;2589;2590;2591;2592;2593;2594;2595;2596;2597;2598;2599;2600;3160;3161;3351;3352;3353;3354;3355;3356;3357;3358;3359;3360;3361;3362;8055;8056;8298;8299;8300;8301;8302;8303;8304;8305;8306;8307;8308;8309;8310;8311;8312;8313;8314;8315;8316;8317;8318;8319;8320…	2419;2588;3161;3358;8055;8300;10665;11239;11315;11592;11946;13158;13566;13765;13864	32	102
gi|67463906;gi|62738921;gi|62738050;gi|62738049;gi|62738048;gi|62738047;gi|58176994;gi|530537428;gi|530537426;gi|530537424;gi|51247093;gi|47169105;gi|47169104;gi|47169103;gi|47169102;gi|47169101;gi|47169077;gi|47169076;gi|47169075;gi|3891587;gi|3891585;gi|3212563;gi|315583498;gi|315583496;gi|2914483;gi|2914482;gi|13399521;gi|110590763;gi|110590762;gi|411024210;gi|136429;CON__P00761;gi|242253868;g…	gi|67463906;gi|62738921;gi|62738050;gi|62738049;gi|62738048;gi|62738047;gi|58176994;gi|530537428;gi|530537426;gi|530537424;gi|51247093;gi|47169105;gi|47169104;gi|47169103;gi|47169102;gi|47169101;gi|47169077;gi|47169076;gi|47169075;gi|3891587;gi|3891585;gi|3212563;gi|315583498;gi|315583496;gi|2914483;gi|2914482;gi|13399521;gi|110590763;gi|110590762;gi|411024210;gi|136429;CON__P00761;gi|242253868;g…	7;7;7;7;7;7;7;7;7;7;7;7;7;7;7;7;7;7;7;7;7;7;7;7;7;7;7;7;7;7;7;7;7;7;6;6;6;6;6;6;6;6;6;4;4;4;3;2;2	7;7;7;7;7;7;7;7;7;7;7;7;7;7;7;7;7;7;7;7;7;7;7;7;7;7;7;7;7;7;7;7;7;7;6;6;6;6;6;6;6;6;6;4;4;4;3;2;2	7;7;7;7;7;7;7;7;7;7;7;7;7;7;7;7;7;7;7;7;7;7;7;7;7;7;7;7;7;7;7;7;7;7;6;6;6;6;6;6;6;6;6;4;4;4;3;2;2	>gi|67463906|pdb|1YF4|A Chain A, Crystal Structure Of Trypsin-Vasopressin Complex;>gi|62738921|pdb|1Z7K|A Chain A, Crystal Structure Of Trypsin- Ovomucoid Turkey Egg White Inhibitor Complex;>gi|62738050|pdb|1TX6|D Chain D, Trypsin:bbi Complex;>gi|62738049|	49	7	7	7	43.5	43.5	43.5	23.475	223	223;223;223;223;223;223;223;223;223;223;223;223;223;223;223;223;223;223;223;223;223;223;223;223;223;223;223;223;223;231;231;231;246;246;223;223;223;223;223;223;223;231;246;82;125;125;98;98;98	0	86.738	202040000	18367000	462830000	219	219			+	0	154;1111;1340;1515;2033;2268;2273	True;True;True;True;True;True;True	161;1160;1394;1579;2126;2367;2372	680;3861;3862;3863;4517;4518;4519;4520;4521;4522;4523;4524;5128;5129;5130;5131;6840;7646;7647;7648;7649;7650;7651;7652;7653;7654;7655;7656;7657;7658;7659;7660;7661;7662;7663;7664;7665;7666;7667;7668;7669;7670;7671;7672;7673;7674;7675;7676;7677;7678;7679;7680;7681;7682;7683;7684;7685;7686;7687;7688;7689;7690;7691;7692;7693;7694;7695;7696;7697;7698;7699;7700;7701;7702;7703;7704;7705;7706;7707;7708;…	1138;6189;6190;6191;7219;7220;7221;7222;7223;7224;7225;7226;7227;7228;7229;8181;8182;8183;8184;8185;8186;8187;8188;8189;10782;12128;12129;12130;12131;12132;12133;12134;12135;12136;12137;12138;12139;12140;12141;12142;12143;12144;12145;12146;12147;12148;12149;12150;12151;12152;12153;12154;12155;12156;12157;12158;12159;12160;12161;12162;12163;12164;12165;12166;12167;12168;12169;12170;12171;12172;121…	1138;6189;7223;8186;10782;12181;12376
gi|833798;gi|164318;gi|545845362;gi|71152981;gi|52353352;gi|51235682;gi|545845360;gi|124257959	gi|833798;gi|164318;gi|545845362;gi|71152981;gi|52353352;gi|51235682;gi|545845360;gi|124257959	46;45;45;45;45;45;45;40	46;45;45;45;45;45;45;40	36;35;35;35;35;35;35;30	>gi|833798|emb|CAA30970.1| albumin, partial [Sus scrofa];>gi|164318|gb|AAA30988.1| albumin, partial [Sus scrofa];>gi|545845362|ref|XP_005666793.1| PREDICTED: serum albumin isoform X2 [Sus scrofa];>gi|71152981|sp|P08835.2|ALBU_PIG RecName: Full=Serum albumi	8	46	46	36	72.7	72.7	58.8	69.41	605	605;605;606;607;607;607;618;607	0	323.31	746060000	18197000	1758800000	427	427				410	22;228;232;309;358;433;439;440;472;473;484;503;514;534;535;536;632;692;895;1003;1016;1020;1186;1254;1284;1288;1342;1379;1381;1382;1470;1626;1628;1791;1811;1832;1833;1842;1843;1857;1952;2105;2241;2430;2583;2599	True;True;True;True;True;True;True;True;True;True;True;True;True;True;True;True;True;True;True;True;True;True;True;True;True;True;True;True;True;True;True;True;True;True;True;True;True;True;True;True;True;True;True;True;True;True	22;235;239;321;371;453;460;461;495;496;507;528;539;559;560;561;661;723;935;1048;1062;1066;1237;1306;1337;1341;1396;1434;1436;1437;1529;1701;1703;1876;1896;1919;1920;1929;1930;1945;2044;2199;2340;2536;2698;2714	82;83;84;85;86;87;88;89;1017;1018;1019;1020;1021;1022;1023;1024;1035;1036;1037;1038;1244;1245;1246;1247;1416;1417;1418;1419;1653;1668;1669;1670;1671;1672;1673;1674;1675;1676;1677;1678;1795;1796;1797;1798;1799;1800;1801;1802;1803;1804;1838;1839;1840;1841;1893;1894;1895;1896;1897;1898;1899;1922;1923;1924;1925;1926;1927;1928;1929;1930;1931;1932;1933;1987;1988;1989;1990;1991;1992;1993;1994;1995;1996;…	207;208;209;210;211;212;213;214;215;216;217;218;219;220;221;1645;1646;1647;1648;1649;1650;1651;1652;1653;1654;1655;1656;1671;1672;1673;1674;1675;1676;1677;1678;2010;2011;2012;2013;2242;2243;2244;2245;2246;2247;2248;2249;2250;2251;2252;2624;2643;2644;2645;2646;2647;2648;2649;2650;2651;2652;2653;2654;2655;2656;2657;2658;2659;2660;2661;2662;2663;2882;2883;2884;2885;2886;2887;2888;2889;2890;2891;2892…	212;1656;1673;2013;2248;2624;2646;2659;2882;2889;2967;3047;3089;3192;3199;3201;3626;3858;5184;5580;5754;5766;6549;6858;7037;7056;7241;7585;7596;7608;7982;8908;8916;9586;9674;9794;9804;9850;9857;9937;10418;11363;11987;13245;14315;14389
gi|290578621;gi|411147299;gi|411147293;gi|555827;gi|2136551;gi|55167422	gi|290578621;gi|411147299;gi|411147293;gi|555827;gi|2136551;gi|55167422	16;16;16;16;16;13	16;16;16;16;16;13	16;16;16;16;16;13	>gi|290578621|gb|ADD51207.1| immunoglobulin IgA heavy chain constant region, partial [Sus scrofa];>gi|411147299|dbj|BAM66317.1| IgA heavy chian constant region, partial [Sus scrofa];>gi|411147293|dbj|BAM66312.1| IgA heavy chian constant region, partial [Su	6	16	16	16	71	71	71	36.316	338	338;341;341;342;342;274	0	185.88	241610000	16107000	453110000	104	104				156	272;293;319;407;408;807;1082;1271;1637;1757;1888;1905;2042;2277;2518;2598	True;True;True;True;True;True;True;True;True;True;True;True;True;True;True;True	283;304;332;424;425;844;1131;1324;1713;1841;1976;1995;2135;2377;2629;2713	1154;1155;1156;1157;1209;1210;1211;1212;1274;1275;1276;1277;1278;1279;1280;1565;1566;1567;1568;2898;2899;2900;3804;3805;3806;4350;4351;5625;5626;5627;5628;5629;5630;5958;5959;6400;6401;6402;6403;6479;6480;6481;6865;6866;7796;7797;7798;8666;8667;8668;8669;8670;8966;8967;8968;8969;8970;8971;8972	1864;1865;1866;1867;1868;1869;1870;1871;1872;1873;1874;1875;1876;1877;1878;1879;1880;1951;1952;1953;1954;1955;1956;1957;1958;1959;1960;1961;1962;1963;1964;1965;1966;1967;2053;2054;2055;2056;2057;2058;2059;2060;2061;2487;2488;2489;2490;4644;4645;4646;6095;6096;6097;6098;6099;6100;6961;6962;8944;8945;8946;8947;8948;8949;8950;8951;9411;9412;10070;10071;10072;10073;10074;10075;10076;10077;10237;10238…	1864;1953;2058;2487;2490;4645;6100;6961;8947;9412;10075;10239;10821;12386;13897;14384
CON__P04264;CON__H-INV:HIT000016045	CON__P04264	33;3	30;2	21;0	>P04264 SWISS-PROT:P04264 Tax_Id=9606 Gene_Symbol=KRT1 Keratin, type II cytoskeletal 1	2	33	30	21	56.4	53.3	42.7	66.017	644	644;99	0	323.31	482880000	15577000	1139700000	233	233			+	7	35;436;453;699;738;826;933;1069;1204;1243;1272;1295;1431;1600;1650;1651;1675;1769;1906;1907;1940;1960;1963;1967;1984;1997;2141;2176;2192;2193;2514;2557;2559	True;True;True;False;True;True;True;False;True;True;True;True;True;True;True;True;True;True;True;True;True;True;True;True;True;True;True;True;True;True;True;False;True	37;456;457;474;475;730;773;863;975;1118;1255;1294;1325;1348;1489;1671;1672;1727;1728;1752;1753;1754;1854;1996;1997;2031;2052;2055;2059;2077;2090;2237;2272;2290;2291;2625;2670;2672	136;137;138;139;1656;1657;1658;1659;1660;1661;1662;1740;1741;1742;1743;1744;1745;1746;1747;2440;2441;2442;2443;2444;2445;2560;2561;2562;2563;3060;3061;3062;3063;3064;3065;3322;3323;3773;3774;3775;3776;4131;4132;4133;4230;4231;4232;4352;4353;4354;4355;4416;4893;4894;4895;4896;4897;5428;5429;5430;5431;5668;5669;5670;5671;5672;5673;5674;5675;5676;5677;5727;5728;5729;5730;5731;5732;5733;5734;5735;573…	288;289;290;291;292;293;2628;2629;2630;2631;2632;2633;2634;2635;2636;2637;2773;2774;2775;2776;2777;2778;2779;2780;2781;2782;2783;2784;2785;2786;2787;2788;2789;2790;2791;2792;2793;2794;2795;3886;3887;3888;3889;3890;3891;3892;3893;3894;3895;3896;3897;3898;3899;3900;3901;3902;3903;3904;3905;3906;3907;3908;3909;4087;4088;4089;4090;4091;4092;4093;4094;4902;4903;4904;4905;4906;4907;4908;5284;5285;5286;…	290;2633;2784;3892;4087;4904;5286;6051;6615;6784;6964;7096;7851;8657;9005;9018;9096;9493;10242;10250;10376;10439;10450;10481;10576;10636;11519;11687;11752;11759;13874;14192;14208	3;4;5;6;7;8;9	259;262;296;326;339;469;493
gi|311273023;gi|545875530;gi|545875541;gi|545875536;gi|545875532;gi|545875538;gi|545875528;gi|311273021;gi|545875526;gi|56608605;gi|55793113;gi|30523349	gi|311273023;gi|545875530;gi|545875541;gi|545875536;gi|545875532;gi|545875538;gi|545875528;gi|311273021;gi|545875526	80;80;79;79;79;78;78;78;77;21;13;5	80;80;79;79;79;78;78;78;77;21;13;5	3;3;2;2;2;1;3;3;2;2;0;3	>gi|311273023|ref|XP_003133689.1| PREDICTED: fibronectin isoformX1 [Sus scrofa];>gi|545875530|ref|XP_005672224.1| PREDICTED: fibronectin isoform X6 [Sus scrofa];>gi|545875541|ref|XP_005672229.1| PREDICTED: fibronectin isoform X11 [Sus scrofa];>gi|545875536	12	80	80	3	54.6	54.6	3.9	252.79	2297	2297;2387;2272;2362;2362;2337;2388;2478;2453;592;360;255	0	323.31	1449400000	15419000	1984200000	629	629				203	239;240;368;371;414;468;486;504;544;607;612;634;640;681;695;754;755;781;794;812;813;821;830;890;901;1029;1037;1044;1087;1088;1154;1173;1179;1190;1258;1356;1472;1624;1664;1700;1711;1739;1764;1829;1862;1863;2037;2050;2061;2081;2093;2108;2116;2120;2128;2129;2136;2146;2198;2204;2249;2252;2295;2323;2329;2348;2425;2460;2466;2479;2496;2507;2508;2517;2528;2564;2569;2607;2612;2619	True;True;True;True;True;True;True;True;True;True;True;True;True;True;True;True;True;True;True;True;True;True;True;True;True;True;True;True;True;True;True;True;True;True;True;True;True;True;True;True;True;True;True;True;True;True;True;True;True;True;True;True;True;True;True;True;True;True;True;True;True;True;True;True;True;True;True;True;True;True;True;True;True;True;True;True;True;True;True;True	246;247;381;384;432;491;509;529;569;570;635;640;663;669;711;712;726;789;790;817;830;849;850;858;867;929;943;1077;1085;1092;1136;1137;1205;1224;1230;1241;1310;1410;1531;1699;1741;1781;1793;1823;1848;1916;1950;1951;2130;2143;2155;2175;2187;2202;2210;2211;2216;2224;2225;2232;2242;2296;2302;2348;2351;2396;2424;2430;2451;2530;2567;2574;2575;2589;2606;2617;2618;2628;2639;2677;2682;2723;2728;2735	1051;1052;1053;1054;1055;1056;1057;1058;1059;1060;1061;1062;1436;1437;1438;1439;1443;1444;1445;1446;1447;1448;1584;1585;1586;1587;1782;1783;1784;1785;1844;1900;1901;1902;1903;1904;1905;2021;2022;2023;2024;2025;2026;2027;2028;2029;2030;2031;2032;2033;2202;2203;2204;2210;2211;2212;2213;2214;2266;2267;2268;2269;2270;2271;2287;2288;2289;2392;2393;2394;2395;2396;2397;2434;2435;2436;2685;2686;2687;2688…	1706;1707;1708;1709;1710;1711;1712;1713;1714;1715;1716;1717;1718;1719;1720;1721;1722;2282;2283;2284;2285;2286;2287;2288;2289;2290;2291;2292;2296;2297;2298;2299;2300;2301;2302;2303;2304;2305;2306;2510;2511;2512;2513;2514;2515;2851;2852;2853;2854;2855;2971;3051;3052;3053;3054;3055;3056;3057;3058;3059;3060;3061;3062;3063;3228;3229;3230;3231;3232;3233;3234;3235;3236;3237;3238;3239;3240;3241;3242;3243…	1708;1718;2283;2297;2514;2851;2971;3052;3233;3551;3561;3633;3666;3818;3879;4313;4316;4418;4468;4659;4666;4747;4915;5113;5201;5823;5873;5930;6107;6112;6378;6477;6503;6564;6884;7287;8018;8897;9062;9190;9226;9358;9440;9773;9976;9982;10802;10909;11085;11259;11298;11374;11408;11438;11455;11459;11488;11542;11794;11827;12045;12063;12551;12677;12694;12791;13213;13431;13468;13583;13803;13839;13845;13888;1…	70;71;72;73;74	464;478;927;1549;1694
gi|17225066;gi|17225056	gi|17225066;gi|17225056	3;2	1;1	1;1	>gi|17225066|gb|AAL37230.1|AF321844_1 immunoglobulin heavy chain variable region, partial [Sus scrofa];>gi|17225056|gb|AAL37225.1|AF321839_1 immunoglobulin heavy chain variable region, partial [Sus scrofa]	2	3	1	1	56	14.3	14.3	8.9979	84	84;83	0	33.964	61247000	15312000	113920000	22	22				123	387;1483;1535	True;False;False	402;403;1542;1600	1495;1496;1497;1498;1499;1500;1501;1502;1503;1504;1505;5034;5035;5036;5200;5201;5202;5203;5204;5205;5206;5207;5208;5209;5210;5211;5212;5213;5214;5215;5216;5217;5218;5219;5220;5221;5222;5223;5224;5225;5226;5227;5228;5229;5230;5231;5232;5233;5234;5235;5236;5237;5238;5239;5240;5241;5242;5243;5244;5245;5246;5247;5248;5249;5250;5251;5252;5253;5254;5255;5256;5257;5258;5259;5260;5261;5262;5263;5264;5265…	2374;2375;2376;2377;2378;2379;2380;2381;2382;2383;2384;2385;2386;2387;2388;2389;2390;2391;2392;2393;2394;2395;2396;8057;8058;8059;8060;8298;8299;8300;8301;8302;8303;8304;8305;8306;8307;8308;8309;8310;8311;8312;8313;8314;8315;8316;8317;8318;8319;8320;8321;8322;8323;8324;8325;8326;8327;8328;8329;8330;8331;8332;8333;8334;8335;8336;8337;8338;8339;8340;8341;8342;8343;8344;8345;8346;8347;8348;8349;8350…	2392;8060;8300	52	83
gi|346716114;gi|38455784	gi|346716114;gi|38455784	6;5	6;5	6;5	>gi|346716114|ref|NP_001231215.1| complement C1q subcomponent subunit C precursor [Sus scrofa];>gi|38455784|gb|AAR20893.1| complement C1qC, partial [Sus scrofa]	2	6	6	6	34.7	34.7	34.7	26.023	245	245;223	0	83.49	177110000	14759000	244560000	43	43				246	714;1026;1812;1822;2380;2424	True;True;True;True;True;True	747;1074;1897;1909;2483;2484;2529	2484;2485;2486;2487;2488;2489;3640;3641;3642;3643;6133;6134;6135;6136;6172;6173;6174;8113;8114;8115;8116;8117;8269	3956;3957;3958;3959;3960;3961;3962;3963;3964;3965;3966;3967;3968;5804;5805;5806;5807;5808;5809;5810;5811;9681;9682;9683;9684;9685;9686;9687;9688;9689;9741;9742;9743;9744;9745;9746;12902;12903;12904;12905;12906;12907;13202	3963;5810;9689;9742;12907;13202	106	196
gi|89215;gi|164509	gi|89215;gi|164509	6;6	3;3	2;2	>gi|89215|pir||PT0219 Ig kappa chain V-C region (PLC18) - pig (fragment);>gi|164509|gb|AAA03520.1| Ig kappa chain, partial [Sus scrofa]	2	6	3	2	50.6	25.3	18	19.469	178	178;178	0	58.356	138350000	13835000	297480000	29	29				114	21;420;593;733;1830;2163	False;False;True;True;False;True	21;439;621;768;1917;2259	62;63;64;65;66;67;68;69;70;71;72;73;74;75;76;77;78;79;80;81;1601;1602;1603;1604;1605;1606;1607;1608;2160;2161;2548;2549;2550;2551;2552;2553;6203;7327	136;137;138;139;140;141;142;143;144;145;146;147;148;149;150;151;152;153;154;155;156;157;158;159;160;161;162;163;164;165;166;167;168;169;170;171;172;173;174;175;176;177;178;179;180;181;182;183;184;185;186;187;188;189;190;191;192;193;194;195;196;197;198;199;200;201;202;203;204;205;206;2534;2535;2536;2537;2538;2539;2540;2541;2542;2543;2544;2545;2546;2547;2548;2549;2550;2551;2552;2553;2554;2555;2556;…	137;2542;3443;4069;9783;11647
gi|47522844;gi|410516871;gi|27801787;gi|11869931;gi|4093218	gi|47522844;gi|410516871;gi|27801787;gi|11869931	82;82;82;82;6	82;82;82;82;6	50;50;50;50;6	>gi|47522844|ref|NP_999174.1| complement C3 precursor [Sus scrofa];>gi|410516871|sp|P01025.2|CO3_PIG RecName: Full=Complement C3; Contains: RecName: Full=Complement C3 beta chain; Contains: RecName: Full=C3-beta-c; Short=C3bc; Contains: RecName: Full=Compl	5	82	82	50	65	65	43.4	186.8	1661	1661;1661;1661;1661;193	0	323.31	1370300000	13703000	2411200000	578	578				58	14;17;23;79;85;157;226;314;317;322;338;365;409;410;411;412;432;447;497;520;564;605;635;644;678;709;762;767;773;975;997;1025;1084;1122;1130;1156;1158;1209;1217;1290;1321;1414;1419;1452;1504;1531;1632;1697;1703;1712;1735;1737;1746;1771;1821;1844;1867;1868;1869;1897;1948;1995;2022;2036;2135;2137;2152;2186;2187;2314;2315;2328;2352;2365;2444;2457;2489;2502;2512;2572;2592;2633	True;True;True;True;True;True;True;True;True;True;True;True;True;True;True;True;True;True;True;True;True;True;True;True;True;True;True;True;True;True;True;True;True;True;True;True;True;True;True;True;True;True;True;True;True;True;True;True;True;True;True;True;True;True;True;True;True;True;True;True;True;True;True;True;True;True;True;True;True;True;True;True;True;True;True;True;True;True;True;True…	14;17;23;82;88;164;233;327;330;335;351;378;426;427;428;429;430;452;468;522;545;591;592;633;664;673;708;741;797;802;803;809;1019;1042;1073;1133;1172;1173;1181;1207;1209;1260;1268;1343;1375;1470;1475;1510;1564;1596;1708;1777;1784;1794;1819;1821;1830;1856;1908;1931;1955;1956;1957;1985;2039;2088;2115;2129;2231;2233;2248;2282;2283;2284;2415;2416;2429;2455;2468;2550;2564;2599;2612;2622;2685;2707;2751	45;46;47;48;49;50;51;54;55;56;57;90;91;92;93;252;253;254;255;256;257;264;265;688;689;690;1013;1014;1015;1261;1262;1263;1264;1270;1271;1272;1283;1284;1285;1286;1375;1376;1377;1432;1433;1569;1570;1571;1572;1573;1574;1575;1576;1577;1578;1579;1580;1581;1649;1650;1651;1652;1687;1688;1689;1690;1691;1692;1693;1694;1877;1878;1879;1880;1881;1882;1948;1949;1950;1951;1952;1953;2067;2068;2069;2070;2071;2072;…	106;107;108;109;110;111;112;113;114;115;116;117;118;119;120;124;125;126;127;128;129;130;131;222;223;224;225;226;227;228;488;489;490;491;492;493;494;495;496;497;505;506;507;508;1146;1147;1148;1639;1640;1641;1642;2032;2033;2034;2035;2036;2037;2038;2039;2040;2041;2042;2049;2050;2051;2065;2066;2067;2068;2069;2070;2071;2072;2073;2074;2075;2192;2193;2194;2277;2278;2491;2492;2493;2494;2495;2496;2497;249…	116;127;225;493;507;1148;1641;2036;2050;2071;2192;2278;2495;2499;2501;2506;2621;2674;3018;3120;3290;3523;3650;3676;3804;3932;4340;4371;4383;5464;5532;5803;6102;6276;6307;6400;6409;6629;6662;7076;7164;7774;7796;7908;8144;8282;8933;9176;9200;9231;9330;9339;9374;9497;9735;9858;9994;10005;10010;10170;10401;10633;10734;10792;11478;11493;11563;11719;11723;12636;12651;12684;12822;12877;13301;13413;13667…	28;29;30;31	200;988;1499;1561
gi|350585732;gi|346716105;gi|38455774	gi|350585732;gi|346716105;gi|38455774	8;8;7	8;8;7	8;8;7	>gi|350585732|ref|XP_003482039.1| PREDICTED: complement C1q subcomponent subunit B-like [Sus scrofa];>gi|346716105|ref|NP_001231212.1| complement C1q subcomponent subunit B precursor [Sus scrofa];>gi|38455774|gb|AAR20888.1| complement C1qB, partial [Sus sc	3	8	8	8	45.5	45.5	45.5	26.174	246	246;246;172	0	134.73	159800000	13317000	210870000	62	62				245	661;900;1257;1322;2035;2147;2423;2495	True;True;True;True;True;True;True;True	690;941;942;1309;1376;2128;2243;2528;2605	2329;2330;2331;2332;3254;3255;3256;4300;4301;4476;4477;4478;4479;4480;6842;6843;6844;7268;7269;7270;7271;7272;7273;7274;8264;8265;8266;8267;8268;8599;8600;8601;8602;8603	3718;3719;3720;3721;3722;3723;3724;3725;3726;3727;3728;3729;3730;3731;3732;3733;3734;3735;3736;3737;3738;3739;3740;3741;3742;5197;5198;5199;5200;6882;6883;7168;7169;7170;7171;7172;7173;7174;7175;10784;10785;10786;11543;11544;11545;11546;11547;11548;11549;11550;11551;11552;13195;13196;13197;13198;13199;13200;13201;13792;13793;13794;13795;13796	3737;5197;6882;7170;10784;11551;13199;13793	105	178
CON__P35527	CON__P35527	28	27	27	>P35527 SWISS-PROT:P35527 Tax_Id=9606 Gene_Symbol=KRT9 Keratin, type I cytoskeletal 9	1	28	27	27	63.7	62.6	62.6	62.129	623	623	0	323.31	291340000	11205000	681780000	157	157			+	13	340;399;538;671;739;827;834;835;990;1116;1144;1145;1202;1281;1605;1643;1727;1728;1749;1754;1762;1816;1898;1942;2056;2174;2434;2547	True;True;True;True;True;True;True;True;True;True;True;True;True;False;True;True;True;True;True;True;True;True;True;True;True;True;True;True	353;416;563;700;774;864;872;873;1034;1165;1166;1195;1196;1253;1334;1677;1720;1811;1812;1833;1838;1846;1902;1903;1986;1987;1988;2033;2149;2150;2270;2540;2658;2659	1380;1381;1382;1383;1549;2003;2004;2005;2006;2007;2008;2358;2359;2360;2564;2565;2566;3066;3067;3068;3090;3091;3092;3093;3094;3095;3465;3466;3467;3468;3469;3470;3471;3472;3880;3881;3882;3883;3969;3970;3971;3972;4128;4371;4372;4373;4374;5437;5438;5439;5440;5647;5888;5889;5890;5891;5892;5893;5936;5937;5938;5939;5940;5953;5954;5955;5971;5972;6150;6151;6152;6153;6154;6155;6156;6438;6439;6440;6441;6442…	2197;2198;2199;2200;2201;2202;2203;2463;3203;3204;3205;3206;3207;3208;3772;3773;3774;4095;4096;4097;4098;4909;4910;4911;4945;4946;4947;4948;4949;4950;4951;4952;5502;5503;5504;5505;5506;5507;5508;5509;5510;5511;5512;5513;5514;5515;5516;5517;5518;5519;5520;6216;6217;6218;6219;6358;6359;6360;6361;6612;7004;7005;7006;7007;7008;7009;7010;7011;8670;8671;8672;8673;8674;8675;8676;8677;8972;9312;9313;9314…	2197;2463;3208;3772;4098;4909;4945;4952;5507;6219;6358;6359;6612;7006;8671;8972;9313;9314;9380;9406;9433;9714;10184;10381;11054;11669;13256;14157	17;18;19;20;21;22	157;245;269;276;286;411
gi|47523674;gi|461527;gi|311233;gi|2388609;CON__Q03247	gi|47523674;gi|461527;gi|311233;gi|2388609	16;16;16;13;1	16;16;16;13;1	16;16;16;13;1	>gi|47523674|ref|NP_999473.1| apolipoprotein E precursor [Sus scrofa];>gi|461527|sp|P18650.2|APOE_PIG RecName: Full=Apolipoprotein E; Short=Apo-E; Flags: Precursor;>gi|311233|emb|CAA51356.1| apolipoprotein E [Sus scrofa];>gi|2388609|gb|AAC29512.1| apolipop	5	16	16	16	53.6	53.6	53.6	36.599	317	317;317;317;317;316	0	273.3	231620000	11029000	453080000	123	123				182	223;500;967;1283;1309;1354;1454;1597;1825;1916;2157;2307;2343;2472;2523;2537	True;True;True;True;True;True;True;True;True;True;True;True;True;True;True;True	230;525;1010;1011;1336;1362;1408;1512;1668;1912;2006;2007;2253;2408;2445;2446;2582;2634;2648	1006;1007;1008;1886;1887;3414;3415;3416;3417;3418;4377;4378;4379;4380;4381;4382;4383;4384;4437;4438;4553;4554;4555;4556;4939;4940;4941;5419;5420;5421;5422;6190;6505;6506;6507;6508;6509;6510;6511;6512;6513;6514;6515;7309;7310;7311;7312;7313;7314;7315;7904;7905;7906;7907;8017;8018;8019;8020;8021;8022;8023;8024;8464;8465;8466;8467;8468;8469;8470;8471;8677;8678;8679;8724;8725;8726;8727;8728;8729;8730	1632;1633;1634;3033;3034;5417;5418;5419;5420;5421;5422;5423;5424;5425;5426;7014;7015;7016;7017;7018;7019;7020;7021;7022;7023;7024;7025;7026;7027;7028;7029;7030;7031;7032;7033;7034;7035;7120;7121;7280;7281;7282;7283;7284;7285;7912;7913;7914;7915;7916;8644;8645;8646;8647;8648;8649;8650;9763;10277;10278;10279;10280;10281;10282;10283;10284;10285;10286;10287;10288;10289;10290;10291;11610;11611;11612;1…	1632;3033;5422;7014;7121;7280;7916;8646;9763;10288;11616;12605;12776;13505;13907;13998	63;64;65	125;142;289
CON__P35908;gi|148747492;gi|146741298;gi|545825146;CON__Q6NXH9;gi|545825417;CON__Q9R0H5;CON__P19013	CON__P35908	36;9;9;4;3;2;2;2	36;9;9;4;3;2;2;2	23;2;2;0;0;0;0;0	>P35908 SWISS-PROT:P35908 Tax_Id=9606 Gene_Symbol=KRT2 Keratin, type II cytoskeletal 2 epidermal	8	36	36	23	70.9	70.9	54.1	65.865	645	645;642;642;526;539;414;524;594	0	323.31	411830000	10838000	992190000	236	236			+	14	172;438;454;488;654;682;699;824;833;836;837;942;986;1069;1260;1261;1273;1396;1432;1461;1652;1719;1959;1964;1996;2059;2082;2219;2220;2287;2291;2406;2513;2557;2562;2587	True;True;True;True;True;True;True;True;True;True;True;True;True;True;True;True;True;True;True;True;True;True;True;True;True;True;True;True;True;True;True;True;True;True;True;True	179;459;476;477;511;683;713;730;861;871;874;875;984;1030;1118;1312;1313;1326;1451;1490;1520;1729;1801;2051;2056;2089;2153;2176;2317;2318;2319;2388;2392;2510;2511;2623;2624;2670;2675;2702	725;726;727;728;1666;1667;1748;1749;1750;1751;1752;1753;1754;1755;1847;1848;2314;2315;2398;2399;2400;2401;2440;2441;2442;2443;2444;2445;3055;3056;3057;3058;3086;3087;3088;3089;3096;3097;3098;3099;3100;3346;3347;3348;3454;3455;3456;3457;3458;3773;3774;3775;3776;4314;4315;4316;4317;4318;4319;4356;4357;4358;4359;4766;4767;4768;4898;4899;4900;4962;4963;4964;4965;5678;5679;5680;5681;5857;5858;5859;586…	1189;1190;1191;1192;1193;1194;2641;2642;2796;2797;2798;2799;2800;2801;2802;2803;2804;2805;2806;2807;2808;2809;2810;2811;2974;2975;3695;3696;3697;3698;3699;3700;3701;3826;3827;3828;3829;3886;3887;3888;3889;3890;3891;3892;3893;3894;3895;3896;3897;3898;3899;3900;3901;3902;3903;3904;3905;3906;3907;3908;3909;4893;4894;4895;4896;4897;4898;4899;4900;4940;4941;4942;4943;4944;4953;4954;4955;4956;4957;4958…	1191;2641;2805;2975;3696;3827;3892;4896;4943;4954;4959;5315;5490;6051;6897;6898;6976;7660;7859;7944;9025;9269;10438;10462;10634;11079;11264;11874;11878;12446;12522;13091;13869;14192;14221;14340	23;24;25;26;27	222;263;300;343;473
gi|753704412;gi|311250866;gi|150438831;gi|767259968;gi|767259933;gi|753704410;gi|335297229;gi|45269029;gi|112980807;gi|476332;gi|20068082;gi|94451600;gi|545816803;gi|187692583	gi|753704412;gi|311250866;gi|150438831;gi|767259968;gi|767259933;gi|753704410;gi|335297229;gi|45269029;gi|112980807	17;17;17;16;16;16;16;16;10;8;6;4;3;3	17;17;17;16;16;16;16;16;10;8;6;4;3;3	8;8;8;7;7;7;7;7;6;4;3;2;0;0	>gi|753704412|gb|JAG69750.1| actin, beta [Sus scrofa domesticus];>gi|311250866|ref|XP_003124328.1| PREDICTED: actin, cytoplasmic 1 [Sus scrofa];>gi|150438831|sp|Q6QAQ1.2|ACTB_PIG RecName: Full=Actin, cytoplasmic 1; AltName: Full=Beta-actin; Contains: RecNa	14	17	17	8	74.1	74.1	42.4	41.736	375	375;375;375;370;370;375;375;404;263;235;169;185;200;246	0	217.11	209290000	10465000	443000000	151	151				97	60;205;265;300;373;376;423;546;974;1022;1183;1289;1607;1753;2076;2228;2264	True;True;True;True;True;True;True;True;True;True;True;True;True;True;True;True;True	63;212;276;311;386;389;442;572;1018;1068;1069;1070;1234;1342;1679;1837;2170;2327;2363	198;199;200;201;818;1136;1137;1138;1139;1221;1222;1223;1224;1451;1452;1453;1454;1455;1456;1457;1461;1462;1463;1464;1465;1618;1619;1620;1621;2036;2037;2038;2039;3434;3435;3436;3437;3438;3625;3626;3627;3628;3629;3630;3631;4072;4073;4074;4075;4076;4077;4078;4079;4397;4398;4399;4400;4401;4402;4403;4404;5442;5946;5947;5948;5949;5950;5951;5952;7076;7077;7078;7079;7080;7081;7520;7521;7522;7523;7524;7525…	384;385;386;387;388;389;390;1335;1837;1838;1839;1840;1982;1983;1984;1985;2309;2310;2311;2312;2313;2314;2315;2316;2317;2318;2319;2320;2321;2322;2328;2329;2330;2331;2332;2333;2579;2580;2581;2582;2583;2584;2585;3251;3252;3253;3254;3255;3256;3257;3258;5450;5451;5452;5453;5454;5455;5456;5457;5458;5459;5460;5461;5462;5780;5781;5782;5783;5784;5785;5786;5787;5788;5789;5790;5791;5792;6517;6518;6519;6520;6…	385;1335;1837;1982;2314;2329;2585;3252;5454;5786;6526;7068;8679;9400;11228;11930;12088	41;42;43;44;45	44;47;119;123;132
gi|41323513;gi|21703159;gi|21703161;gi|41323531	gi|41323513;gi|21703159;gi|21703161;gi|41323531	2;1;1;1	2;1;1;1	2;1;1;1	>gi|41323513|gb|AAR99914.1| immunoglobulin kappa variable region, partial [Sus scrofa];>gi|21703159|gb|AAM76077.1|AF334739_1 immunoglobulin kappa light chain VJ region, partial [Sus scrofa];>gi|21703161|gb|AAM76078.1|AF334740_1 immunoglobulin kappa light c	4	2	2	2	26.8	26.8	26.8	13.472	127	127;107;107;127	0	32.138	39319000	9829700	77302000	23	23				295	184;1405	True;True	191;1460	748;749;750;751;752;753;4815;4816;4817;4818;4819;4820	1215;1216;1217;1218;1219;1220;1221;1222;1223;1224;1225;7735;7736;7737;7738;7739;7740;7741;7742;7743;7744;7745;7746	1215;7740
gi|545849528;gi|311265152	gi|545849528;gi|311265152	6;6	6;6	6;6	>gi|545849528|ref|XP_005667609.1| PREDICTED: apolipoprotein R-like isoform X2 [Sus scrofa];>gi|311265152|ref|XP_003130505.1| PREDICTED: apolipoprotein R-like isoform X1 [Sus scrofa]	2	6	6	6	41.2	41.2	41.2	21.536	194	194;194	0	67.869	52536000	8756000	140650000	26	26				199	234;244;1429;1505;1560;2529	True;True;True;True;True;True	241;254;1486;1487;1565;1625;1626;2640	1041;1042;1043;1077;1078;1079;1080;4887;4888;4889;5103;5104;5327;5328;5329;8700;8701	1682;1683;1684;1685;1686;1687;1688;1689;1690;1737;1738;1739;1740;1741;7844;7845;7846;7847;8148;8149;8150;8151;8152;8514;8515;8516;13936;13937	1685;1740;7844;8151;8515;13937	69	160
gi|545822838;gi|295444954;gi|226442051;gi|195969553	gi|545822838;gi|295444954;gi|226442051;gi|195969553	5;5;5;5	5;5;5;5	5;5;5;5	>gi|545822838|ref|XP_005663401.1| PREDICTED: S100 calcium binding protein A9 isoform X1 [Sus scrofa];>gi|295444954|ref|NP_001171377.1| RNA-binding region containing protein 2-like [Sus scrofa];>gi|226442051|gb|ACO57615.1| calcium-binding protein A9 [Sus sc	4	5	5	5	48.6	48.6	48.6	15.892	144	144;144;144;144	0	70.32	42633000	8526500	88096000	41	41				142	31;86;558;1529;1782	True;True;True;True;True	32;33;89;584;1593;1594;1867	123;124;125;126;127;266;267;268;269;270;271;272;273;2056;2057;2058;5177;5178;5179;5180;5181;5182;5183;5184;5185;5186;5187;6041;6042;6043;6044	272;273;274;275;276;277;509;510;511;512;513;514;515;516;517;518;3275;3276;3277;8262;8263;8264;8265;8266;8267;8268;8269;8270;8271;8272;8273;8274;8275;8276;8277;8278;8279;9553;9554;9555;9556	276;511;3276;8277;9554	55;56;57	5;8;94
gi|417515493;CON__ENSEMBL:ENSBTAP00000024146	gi|417515493	51;3	51;3	4;1	>gi|417515493|gb|JAA53574.1| alpha-2-macroglobulin [Sus scrofa]	2	51	51	4	51.8	51.8	3.4	163.99	1478	1478;1477	0	323.31	443060000	6713100	725510000	250	250				306	4;52;71;113;198;337;359;449;568;628;633;728;785;828;840;851;931;1043;1053;1115;1132;1155;1205;1374;1388;1406;1447;1611;1630;1783;1799;1814;1886;1891;1904;1973;1982;1991;2032;2045;2121;2206;2250;2351;2454;2487;2497;2499;2568;2575;2596	True;True;True;True;True;True;True;True;True;True;True;True;True;True;True;True;True;True;True;True;True;True;True;True;True;True;True;True;True;True;True;True;True;True;True;True;True;True;True;True;True;True;True;True;True;True;True;True;True;True;True	4;54;55;74;117;205;350;372;470;596;657;662;763;821;865;878;890;973;1091;1102;1164;1183;1206;1256;1429;1443;1461;1505;1685;1705;1706;1868;1884;1900;1974;1979;1994;2065;2075;2084;2125;2138;2217;2304;2349;2454;2560;2561;2597;2607;2609;2681;2688;2711	7;172;173;174;175;176;177;178;179;180;230;231;232;233;234;235;236;237;353;354;803;804;805;806;1371;1372;1373;1374;1420;1421;1422;1423;1696;1697;1698;1699;2084;2252;2253;2254;2263;2264;2265;2534;2770;2771;2772;3069;3103;3129;3130;3315;3316;3317;3318;3699;3700;3701;3702;3703;3732;3733;3734;3872;3873;3874;3875;3876;3877;3878;3879;3940;3941;3942;3990;3991;3992;3993;4134;4135;4707;4740;4741;4742;4821;…	11;338;339;340;341;342;343;344;345;346;347;348;349;350;453;454;455;456;457;458;459;460;461;462;637;638;1316;1317;1318;1319;1320;1321;1322;2188;2189;2190;2191;2253;2254;2255;2256;2257;2688;2689;2690;2691;3311;3613;3614;3615;3627;3628;3629;4040;4429;4430;4431;4432;4433;4912;4964;4997;4998;5276;5277;5278;5279;5280;5917;5918;5919;5920;5921;5922;5979;5980;5981;6208;6209;6210;6211;6212;6213;6214;6215;6…	11;339;454;637;1317;2188;2254;2688;3311;3614;3627;4040;4429;4912;4964;4997;5279;5919;5980;6212;6312;6384;6619;7572;7623;7748;7882;8833;8928;9560;9624;9708;10067;10088;10233;10527;10566;10614;10776;10894;11440;11831;12057;12817;13402;13656;13809;13813;14260;14284;14371	99;100;101	145;834;964
gi|815937357;gi|545892243;gi|951375;gi|545818714;gi|347666779;gi|552361	gi|815937357;gi|545892243;gi|951375;gi|545818714	162;162;114;92;34;4	162;162;114;92;34;4	97;97;67;45;7;4	>gi|815937357|gb|AKE50882.1| APOB [Sus scrofa];>gi|545892243|ref|XP_005674500.1| PREDICTED: LOW QUALITY PROTEIN: apolipoprotein B-100 [Sus scrofa];>gi|951375|gb|AAA74655.1| apolipoprotein B, partial [Sus scrofa];>gi|545818714|ref|XP_005662767.1| PREDICTED:	6	162	162	97	54.7	54.7	34.1	438.83	3882	3882;3937;2629;2237;819;94	0	323.31	1375200000	6675900	3133300000	912	912				393	6;32;44;47;99;111;119;120;125;135;140;143;159;169;185;191;192;328;347;352;357;364;372;393;429;533;542;575;591;624;625;636;639;657;669;670;674;679;680;689;710;716;719;720;727;743;746;783;849;857;885;889;891;898;944;953;996;1001;1032;1039;1054;1055;1096;1103;1105;1139;1140;1141;1168;1174;1175;1176;1193;1195;1211;1213;1224;1230;1237;1282;1291;1294;1301;1313;1363;1364;1373;1385;1416;1426;1455;1459;14…	True;True;True;True;True;True;True;True;True;True;True;True;True;True;True;True;True;True;True;True;True;True;True;True;True;True;True;True;True;True;True;True;True;True;True;True;True;True;True;True;True;True;True;True;True;True;True;True;True;True;True;True;True;True;True;True;True;True;True;True;True;True;True;True;True;True;True;True;True;True;True;True;True;True;True;True;True;True;True;True…	6;34;46;49;102;115;124;125;130;140;141;147;150;166;176;192;198;199;341;360;365;370;377;385;410;449;558;567;603;619;652;653;665;668;686;698;699;703;709;710;720;742;743;749;750;753;754;762;778;781;819;888;896;924;928;930;938;939;986;996;1040;1041;1046;1080;1087;1103;1104;1145;1152;1154;1190;1191;1192;1219;1225;1226;1227;1244;1246;1262;1264;1275;1281;1288;1335;1344;1347;1354;1366;1367;1418;1419;1428…	11;12;13;14;128;129;130;131;132;133;156;159;160;161;320;321;322;323;345;346;347;348;349;350;351;376;377;378;379;380;381;382;383;384;385;394;395;396;397;419;420;421;422;423;424;437;438;439;440;444;445;446;447;448;449;450;451;692;693;694;695;696;697;715;716;717;754;768;769;770;771;772;773;774;1351;1352;1353;1354;1393;1401;1412;1413;1414;1415;1431;1449;1450;1529;1530;1531;1532;1641;1642;1643;1978;19…	18;19;20;21;278;279;280;281;282;283;284;318;321;322;323;589;590;591;592;593;594;595;625;626;627;628;629;630;631;632;633;634;635;663;664;665;666;667;668;669;670;671;672;673;682;683;684;685;686;709;710;711;712;713;714;715;716;735;736;737;738;742;743;744;745;746;747;748;749;750;1150;1151;1152;1153;1154;1155;1156;1157;1176;1177;1178;1179;1226;1242;1243;1244;1245;1246;1247;1248;1249;1250;2161;2162;216…	20;284;318;321;589;627;663;673;686;715;735;746;1156;1177;1226;1242;1245;2163;2214;2222;2235;2276;2307;2438;2611;3168;3225;3325;3430;3587;3595;3656;3665;3704;3760;3767;3778;3808;3817;3843;3936;3973;4009;4016;4036;4112;4121;4427;4993;5004;5092;5103;5135;5192;5330;5365;5529;5574;5845;5907;5987;5990;6124;6135;6144;6350;6353;6355;6442;6479;6486;6494;6586;6592;6633;6639;6677;6688;6700;7013;7083;7091;71…	48;49;50;51;129;133;137;138;154;155;156;157;158;159;160;161	217;322;369;370;1046;1047;1053;1112;1412;1450;1644;2695;2713;2801;2989;3557
gi|545818717;gi|727172;gi|164369;CON__ENSEMBL:ENSBTAP00000032840;gi|545818707;gi|315308046;gi|315308044;gi|315308038;gi|315308034;gi|315308032;gi|315308002;gi|315308000;gi|315307992;gi|315307990;gi|315307988;gi|315308050;gi|315308048;gi|315308042;gi|315308040;gi|315308036;gi|315308030;gi|315308028;gi|315308026;gi|315308024;gi|315308022;gi|315308020;gi|315308018;gi|315308016;gi|315308010;gi|315308…	gi|545818717	62;12;11;7;6;2;2;2;2;2;2;2;2;2;2;1;1;1;1;1;1;1;1;1;1;1;1;1;1;1;1;1;1;1	44;12;11;3;4;2;2;2;2;2;2;2;2;2;2;1;1;1;1;1;1;1;1;1;1;1;1;1;1;1;1;1;1;1	44;12;11;3;4;2;2;2;2;2;2;2;2;2;2;1;1;1;1;1;1;1;1;1;1;1;1;1;1;1;1;1;1;1	>gi|545818717|ref|XP_005662768.1| PREDICTED: apolipoprotein B-100-like [Sus scrofa]	34	62	44	44	62.7	42.4	42.4	143.47	1277	1277;238;238;825;124;57;57;57;57;57;57;57;57;57;57;57;57;57;57;57;57;57;57;57;57;57;57;57;57;57;57;57;57;57	0	323.31	479600000	6661100	1083000000	258	258				343	12;129;140;151;190;220;328;507;533;589;591;624;627;636;670;679;727;761;816;849;891;898;1039;1068;1194;1231;1249;1263;1267;1334;1359;1364;1370;1412;1426;1525;1596;1638;1662;1698;1705;1758;1820;1838;1896;1950;1961;1979;2058;2110;2178;2181;2185;2196;2312;2313;2333;2404;2429;2473;2577;2629	True;True;False;True;True;True;False;True;False;True;False;False;True;False;False;False;False;True;True;False;False;False;False;True;True;True;True;True;True;True;True;False;True;True;False;True;True;True;True;False;True;True;False;True;True;True;True;True;True;True;True;True;True;True;True;True;True;True;True;True;False;True	12;134;147;158;197;227;341;532;558;617;619;652;656;665;699;709;762;796;853;888;930;938;939;1087;1117;1245;1282;1300;1315;1319;1320;1388;1413;1419;1425;1467;1468;1482;1589;1667;1714;1739;1778;1779;1786;1787;1842;1907;1925;1984;2041;2042;2053;2072;2152;2204;2274;2277;2281;2294;2413;2414;2434;2508;2534;2535;2583;2690;2691;2692;2747	39;40;41;42;402;403;404;437;438;439;440;676;762;763;764;765;766;767;996;997;998;999;1000;1001;1002;1003;1351;1352;1353;1354;1908;1909;1910;1911;1978;1979;1980;1981;1982;1983;1984;1985;1986;2146;2147;2148;2149;2150;2151;2153;2154;2155;2156;2157;2158;2236;2237;2238;2239;2244;2245;2246;2247;2248;2249;2250;2251;2275;2276;2277;2278;2353;2354;2355;2356;2357;2386;2387;2388;2389;2390;2527;2528;2529;2530;…	96;97;98;99;100;101;102;103;691;692;693;735;736;737;738;1134;1235;1236;1237;1238;1239;1240;1241;1618;1619;1620;1621;1622;1623;1624;1625;1626;1627;1628;1629;2161;2162;2163;2164;2165;2166;3069;3070;3071;3072;3073;3074;3167;3168;3169;3170;3171;3172;3173;3174;3175;3176;3177;3178;3179;3180;3418;3419;3420;3421;3422;3423;3425;3426;3427;3428;3429;3430;3431;3432;3587;3588;3589;3590;3591;3599;3600;3601;360…	100;691;735;1134;1237;1618;2163;3072;3168;3420;3430;3587;3606;3656;3767;3808;4036;4339;4687;4993;5135;5192;5907;6047;6590;6693;6815;6909;6934;7204;7297;7428;7542;7767;7828;8251;8643;8955;9059;9183;9208;9413;9732;9826;10158;10414;10441;10556;11072;11380;11700;11708;11715;11781;12628;12629;12705;13081;13240;13521;14287;14634	129;130;131;132;133;134;135;136;137;138	122;227;274;275;560;562;624;897;1146;1217
gi|545849525;gi|545849523	gi|545849525;gi|545849523	22;22	22;22	17;17	>gi|545849525|ref|XP_005667608.1| PREDICTED: C4b-binding protein alpha chain-like isoform X2 [Sus scrofa];>gi|545849523|ref|XP_005667607.1| PREDICTED: C4b-binding protein alpha chain-like isoform X1 [Sus scrofa]	2	22	22	17	49.7	49.7	42.5	67.366	600	600;613	0	219.95	195140000	5913400	389660000	115	115				368	156;236;245;246;606;940;959;1014;1165;1177;1201;1226;1274;1324;1645;1734;2217;2247;2530;2601;2617;2627	True;True;True;True;True;True;True;True;True;True;True;True;True;True;True;True;True;True;True;True;True;True	163;243;255;256;634;982;1002;1060;1216;1228;1252;1277;1327;1378;1722;1818;2315;2346;2641;2717;2733;2745	682;683;684;685;686;687;1045;1046;1081;1082;1083;1084;1085;1086;1087;1088;1089;2200;2201;3338;3339;3393;3394;3395;3396;3600;4022;4023;4024;4025;4057;4058;4059;4060;4126;4127;4181;4182;4183;4360;4361;4482;4483;5654;5655;5656;5657;5901;7486;7487;7582;8702;9001;9042;9091;9092;9093;9094;9095;9096	1140;1141;1142;1143;1144;1145;1693;1694;1695;1696;1697;1698;1699;1700;1701;1742;1743;1744;1745;1746;1747;1748;1749;1750;1751;1752;1753;1754;1755;1756;1757;1758;1759;1760;1761;1762;1763;1764;1765;1766;1767;1768;3537;3538;3539;5305;5306;5385;5386;5387;5388;5389;5390;5391;5392;5393;5394;5395;5396;5744;6428;6429;6430;6431;6432;6433;6434;6498;6499;6500;6501;6604;6605;6606;6607;6608;6609;6610;6611;6680…	1140;1693;1751;1768;3538;5306;5386;5744;6432;6498;6608;6680;6985;7177;8984;9327;11872;12017;13938;14428;14494;14565
gi|75059261;gi|47523408;gi|1228925;gi|163867305	gi|75059261;gi|47523408;gi|1228925	9;9;9;2	4;4;4;1	4;4;4;1	>gi|75059261|sp|Q29042.1|FCN1_PIG RecName: Full=Ficolin-1; AltName: Full=Ficolin-A; AltName: Full=Ficolin-alpha; Flags: Precursor;>gi|47523408|ref|NP_999325.1| ficolin-1 precursor [Sus scrofa];>gi|1228925|gb|AAC69641.1| ficolin [Sus scrofa]	4	9	4	4	40.2	28.5	28.5	35.246	326	326;326;326;69	0	35.233	65510000	4679300	153130000	16	16				79	818;843;1543;1871;1895;1930;2289;2482;2483	True;True;True;False;False;True;False;False;False	855;881;882;1608;1959;1983;2021;2390;2592;2593	2943;3109;3110;5292;5293;6361;6362;6363;6364;6365;6416;6417;6418;6419;6420;6421;6422;6423;6424;6555;6556;6557;6558;6559;6560;7833;7834;7835;7836;7837;7838;7839;7840;7841;7842;7843;7844;7845;7846;7847;7848;7849;7850;7851;7852;7853;7854;7855;7856;7857;8524;8525;8526	4738;4970;4971;8468;8469;10016;10017;10018;10019;10020;10021;10022;10102;10103;10104;10105;10106;10107;10108;10109;10110;10111;10112;10113;10114;10115;10116;10117;10118;10119;10120;10121;10122;10123;10124;10125;10126;10127;10128;10129;10130;10131;10132;10133;10134;10135;10136;10137;10138;10139;10140;10141;10142;10143;10144;10145;10146;10147;10148;10149;10355;10356;10357;10358;10359;10360;10361;10…	4738;4970;8468;10019;10103;10358;12461;13644;13646	36	148
gi|41323667	gi|41323667	3	1	1	>gi|41323667|gb|AAR99991.1| immunoglobulin kappa variable region, partial [Sus scrofa]	1	3	1	1	25.2	6.9	6.9	14.216	131	131	0	14.929	26113000	4352100	48388000	10	10				305	750;1724;2040	False;True;False	785;1808;2133	2673;2674;2675;2676;2677;2678;2679;5877;5878;5879;5880;6858;6859;6860;6861;6862	4277;4278;4279;4280;4281;4282;4283;4284;4285;4286;4287;4288;4289;4290;4291;4292;4293;4294;4295;9295;9296;9297;9298;9299;9300;9301;9302;9303;9304;10806;10807;10808;10809;10810;10811;10812;10813;10814;10815;10816;10817;10818	4287;9295;10814
gi|753704062;gi|311276245	gi|753704062;gi|311276245	10;10	10;10	10;10	>gi|753704062|gb|JAG69642.1| complement factor properdin [Sus scrofa domesticus];>gi|311276245|ref|XP_003135101.1| PREDICTED: properdin [Sus scrofa]	2	10	10	10	32.6	32.6	32.6	50.72	463	463;463	0	118.87	64445000	4296300	115880000	63	63				206	242;254;831;884;980;998;1446;1858;1893;2104	True;True;True;True;True;True;True;True;True;True	249;250;251;264;868;923;1024;1043;1504;1946;1981;2198	1066;1067;1068;1069;1070;1071;1072;1073;1105;1106;1107;3073;3074;3075;3076;3198;3447;3486;3487;3488;3489;3490;3491;3492;3493;4920;6309;6310;6311;6312;6313;6314;6315;6316;6411;6412;6413;6414;7144;7145;7146;7147	1726;1727;1728;1729;1730;1731;1732;1733;1784;1785;1786;4917;4918;4919;4920;4921;4922;5091;5479;5535;5536;5537;5538;5539;5540;5541;5542;5543;5544;5545;5546;7881;9946;9947;9948;9949;9950;9951;9952;9953;9954;9955;9956;9957;9958;9959;9960;9961;9962;10093;10094;10095;10096;10097;10098;10099;11351;11352;11353;11354;11355;11356;11357	1729;1784;4919;5091;5479;5542;7881;9947;10093;11357	75;76	446;447
gi|441477616;gi|441477622;gi|433130;gi|2136516;gi|558857;gi|2136521	gi|441477616;gi|441477622;gi|433130;gi|2136516	14;10;9;9;2;2	8;5;5;5;1;1	3;2;2;2;0;0	>gi|441477616|dbj|BAM75563.1| IgG heavy chain precursor [Sus scrofa];>gi|441477622|dbj|BAM75566.1| IgG heavy chain precursor [Sus scrofa];>gi|433130|gb|AAA52220.1| Ig gamma 4a chain constant region, partial [Sus scrofa];>gi|2136516|pir||I47162 Ig gamma 4 c	6	14	8	3	44.1	27.4	11.5	50.695	460	460;475;277;277;137;137	0	58.396	88318000	4205600	147090000	39	39				320	366;389;427;582;796;878;1535;2080;2094;2154;2234;2251;2469;2494	False;False;False;True;True;True;False;False;True;True;False;True;True;True	379;405;406;446;447;610;832;917;1600;2174;2188;2250;2333;2350;2578;2604	1434;1507;1508;1509;1510;1511;1512;1513;1514;1515;1516;1517;1518;1519;1520;1634;1635;1636;1637;1638;1639;2116;2117;2118;2119;2120;2121;2122;2803;3178;3179;3180;3181;5200;5201;5202;5203;5204;5205;5206;5207;5208;5209;5210;5211;5212;5213;5214;5215;5216;5217;5218;5219;5220;5221;5222;5223;5224;5225;5226;5227;5228;5229;5230;5231;5232;5233;5234;5235;5236;5237;5238;5239;5240;5241;5242;5243;5244;5245;5246…	2279;2398;2399;2400;2401;2402;2403;2404;2405;2406;2407;2408;2409;2410;2411;2412;2413;2414;2415;2416;2417;2418;2419;2420;2421;2422;2423;2424;2425;2601;2602;2603;2604;2605;2606;2607;2608;3363;3364;3365;3366;3367;3368;3369;3370;3371;3372;3373;4485;5061;5062;5063;5064;5065;5066;8298;8299;8300;8301;8302;8303;8304;8305;8306;8307;8308;8309;8310;8311;8312;8313;8314;8315;8316;8317;8318;8319;8320;8321;8322…	2279;2419;2604;3363;4485;5064;8300;11239;11302;11569;11947;12061;13483;13791	32;46	102;263
gi|441477601;gi|441477626;gi|188572018	gi|441477601;gi|441477626;gi|188572018	13;12;11	4;4;4	0;0;0	>gi|441477601|dbj|BAM75556.1| IgG heavy chain precursor [Sus scrofa];>gi|441477626|dbj|BAM75568.1| IgG heavy chain precursor [Sus scrofa];>gi|188572018|gb|ACD64981.1| immunoglobulin gamma-2 heavy chain constant region, partial [Sus scrofa]	3	13	4	0	48.6	18.5	0	52.337	475	475;470;328	0	45.042	83612000	4180600	107370000	42	42				318	186;366;389;427;580;1535;2080;2095;2155;2207;2234;2446;2494	True;False;False;False;True;False;False;False;True;False;False;True;False	193;379;405;406;446;447;608;1600;2174;2189;2251;2305;2333;2552;2604	755;756;757;1434;1507;1508;1509;1510;1511;1512;1513;1514;1515;1516;1517;1518;1519;1520;1634;1635;1636;1637;1638;1639;2106;2107;2108;2109;2110;2111;5200;5201;5202;5203;5204;5205;5206;5207;5208;5209;5210;5211;5212;5213;5214;5215;5216;5217;5218;5219;5220;5221;5222;5223;5224;5225;5226;5227;5228;5229;5230;5231;5232;5233;5234;5235;5236;5237;5238;5239;5240;5241;5242;5243;5244;5245;5246;5247;5248;5249;52…	1227;1228;1229;2279;2398;2399;2400;2401;2402;2403;2404;2405;2406;2407;2408;2409;2410;2411;2412;2413;2414;2415;2416;2417;2418;2419;2420;2421;2422;2423;2424;2425;2601;2602;2603;2604;2605;2606;2607;2608;3334;3335;3336;3337;3338;3339;3340;3341;3342;3343;3344;3345;3346;3347;3348;3349;3350;8298;8299;8300;8301;8302;8303;8304;8305;8306;8307;8308;8309;8310;8311;8312;8313;8314;8315;8316;8317;8318;8319;8320…	1228;2279;2419;2604;3347;8300;11239;11315;11572;11839;11947;13308;13791	32;46	104;278
gi|441477583;gi|411147288;gi|411147285;gi|17225069;gi|119662985;gi|119662947;gi|571387;gi|2136531;gi|571395;gi|2136535;gi|571421;gi|2136548;gi|571423;gi|559795;gi|556006;gi|2136549;gi|2136518;gi|2136517;gi|571417;gi|571401;gi|571393;gi|2136546;gi|2136538;gi|2136534;gi|571409;gi|2136542;gi|2149936	gi|441477583;gi|411147288;gi|411147285	14;12;12;1;1;1;1;1;1;1;1;1;1;1;1;1;1;1;1;1;1;1;1;1;1;1;1	11;10;10;0;0;0;0;0;0;0;0;0;0;0;0;0;0;0;0;0;0;0;0;0;0;0;0	4;3;3;0;0;0;0;0;0;0;0;0;0;0;0;0;0;0;0;0;0;0;0;0;0;0;0	>gi|441477583|dbj|BAM75547.1| IgG heavy chain precursor [Sus scrofa];>gi|411147288|dbj|BAM66307.1| IgG heavy chian constant region, partial [Sus scrofa];>gi|411147285|dbj|BAM66305.1| IgG heavy chian constant region, partial [Sus scrofa]	27	14	11	4	42.9	31.3	12.2	51.504	469	469;322;322;84;125;126;132;132;133;133;140;140;141;141;141;141;141;141;142;142;142;142;142;142;143;143;567	0	87.629	82992000	3952000	89091000	29	29				313	343;388;529;1466;1535;1880;1924;2013;2202;2286;2414;2468;2492;2618	True;True;False;True;False;True;True;True;True;True;True;True;False;True	356;404;554;1525;1600;1968;2015;2106;2300;2387;2519;2577;2602;2734	1389;1506;1971;1972;4976;5200;5201;5202;5203;5204;5205;5206;5207;5208;5209;5210;5211;5212;5213;5214;5215;5216;5217;5218;5219;5220;5221;5222;5223;5224;5225;5226;5227;5228;5229;5230;5231;5232;5233;5234;5235;5236;5237;5238;5239;5240;5241;5242;5243;5244;5245;5246;5247;5248;5249;5250;5251;5252;5253;5254;5255;5256;5257;5258;5259;5260;5261;5262;5263;5264;5265;5266;5267;5268;5269;5270;5271;5272;5273;5274…	2209;2210;2397;3160;3161;7959;8298;8299;8300;8301;8302;8303;8304;8305;8306;8307;8308;8309;8310;8311;8312;8313;8314;8315;8316;8317;8318;8319;8320;8321;8322;8323;8324;8325;8326;8327;8328;8329;8330;8331;8332;8333;8334;8335;8336;8337;8338;8339;8340;8341;8342;8343;8344;8345;8346;8347;8348;8349;8350;8351;8352;8353;8354;8355;8356;8357;8358;8359;8360;8361;8362;8363;8364;8365;8366;8367;8368;8369;8370;8371…	2210;2397;3161;7959;8300;10040;10321;10695;11822;12443;13144;13478;13757;14495
CON__P02070;CON__Q3SX09	CON__P02070;CON__Q3SX09	2;2	1;1	1;1	>P02070 SWISS-PROT:P02070 (Bos taurus) Hemoglobin subunit beta;>Q3SX09 TREMBL:Q3SX09 (Bos taurus) similar to HBG protein	2	2	1	1	15.2	8.3	8.3	15.954	145	145;201	0	14.122	42395000	3854100	67276000	48	48			+	1	1402;1425	True;False	1457;1481	4778;4779;4780;4781;4782;4783;4784;4785;4786;4787;4788;4789;4790;4791;4792;4793;4794;4795;4796;4797;4798;4799;4800;4801;4802;4803;4804;4805;4806;4807;4808;4809;4810;4811;4871;4872;4873;4874	7682;7683;7684;7685;7686;7687;7688;7689;7690;7691;7692;7693;7694;7695;7696;7697;7698;7699;7700;7701;7702;7703;7704;7705;7706;7707;7708;7709;7710;7711;7712;7713;7714;7715;7716;7717;7718;7719;7720;7721;7722;7723;7724;7725;7726;7727;7728;7729;7730;7808;7809;7810;7811;7812;7813;7814;7815;7816;7817;7818;7819;7820;7821;7822;7823;7824	7683;7816
gi|545845557;gi|346421314;gi|545845559;CON__P02676	gi|545845557;gi|346421314;gi|545845559	17;17;16;5	17;17;16;5	17;17;16;5	>gi|545845557|ref|XP_005666861.1| PREDICTED: fibrinogen beta chain isoform X1 [Sus scrofa];>gi|346421314|ref|NP_001231042.1| fibrinogen beta chain precursor [Sus scrofa];>gi|545845559|ref|XP_005666862.1| PREDICTED: fibrinogen beta chain isoform X2 [Sus scr	4	17	17	17	48.8	48.8	48.8	55.661	488	488;495;432;495	0	187.1	103280000	3688400	115590000	51	51				243	94;383;480;842;988;1024;1152;1240;1320;1404;1742;1835;2190;2199;2218;2546;2637	True;True;True;True;True;True;True;True;True;True;True;True;True;True;True;True;True	97;397;503;880;1032;1072;1203;1291;1374;1459;1826;1922;2287;2297;2316;2657;2755	303;304;305;1479;1480;1481;1823;3106;3107;3108;3461;3462;3463;3633;3634;3635;3984;4223;4224;4465;4466;4467;4813;4814;5924;5925;5926;6230;7389;7390;7432;7433;7434;7435;7436;7488;8820;9125;9126	563;564;565;566;567;568;2351;2352;2353;2928;2929;4967;4968;4969;5498;5499;5500;5794;5795;5796;6374;6375;6770;6771;7153;7154;7155;7732;7733;7734;9364;9365;9366;9367;9823;11729;11730;11795;11796;11797;11798;11799;11800;11801;11802;11803;11873;14146;14147;14649;14650	563;2351;2929;4968;5499;5794;6374;6771;7153;7732;9364;9823;11730;11796;11873;14146;14649
gi|545845555;gi|350596467	gi|545845555;gi|350596467	9;9	9;9	6;6	>gi|545845555|ref|XP_005666860.1| PREDICTED: fibrinogen alpha chain-like, partial [Sus scrofa];>gi|350596467|ref|XP_003129178.3| PREDICTED: fibrinogen alpha chain, partial [Sus scrofa]	2	9	9	6	34.4	34.4	23.4	35.025	308	308;335	0	83.207	64548000	3586000	72803000	30	30				281	400;600;790;883;1160;1646;1773;1827;2436	True;True;True;True;True;True;True;True;True	417;628;826;922;1211;1723;1858;1914;2542	1550;2181;2781;2782;2783;3196;3197;4008;4009;5658;5659;6012;6013;6014;6015;6194;6195;8307;8308;8309	2464;3499;4442;4443;4444;5088;5089;5090;6414;6415;8988;8989;8990;8991;8992;9506;9507;9508;9509;9510;9767;9768;9769;9770;13269;13270;13271;13272;13273;13274	2464;3499;4442;5088;6415;8990;9507;9767;13274
gi|545848667;gi|545848665;gi|545848663;gi|50657386;gi|416627;gi|164361	gi|545848667;gi|545848665;gi|545848663;gi|50657386;gi|416627;gi|164361	4;4;4;4;4;4	4;4;4;4;4;4	4;4;4;4;4;4	>gi|545848667|ref|XP_005667431.1| PREDICTED: apolipoprotein C-III isoform X3 [Sus scrofa];>gi|545848665|ref|XP_005667430.1| PREDICTED: apolipoprotein C-III isoform X2 [Sus scrofa];>gi|545848663|ref|XP_005667429.1| PREDICTED: apolipoprotein C-III isoform X1	6	4	4	4	47.9	47.9	47.9	10.704	96	96;96;96;96;96;96	0	51.447	20420000	3403300	55377000	20	20				108	601;748;968;2096	True;True;True;True	629;783;1012;2190	2182;2183;2184;2185;2670;2671;3419;3420;7126;7127	3500;3501;3502;3503;3504;3505;3506;3507;3508;3509;3510;3511;3512;4272;4273;4274;5427;5428;11321;11322	3510;4272;5427;11321
gi|347300340;CON__Q28194;gi|54694859;gi|91199935;gi|545797239;gi|545822768;gi|545822766;gi|311254175	gi|347300340;CON__Q28194	43;30;8;3;2;1;1;1	43;30;8;3;2;1;1;1	43;30;8;3;2;1;1;1	>gi|347300340|ref|NP_001231465.1| thrombospondin 1 precursor [Sus scrofa];>Q28194 TREMBL:Q28194 (Bos taurus) Thrombospondin-1	8	43	43	43	44.7	44.7	44.7	129.54	1170	1170;1170;249;79;1170;836;947;956	0	323.31	208900000	3315800	211840000	93	93			+	254	72;158;161;262;299;302;355;367;379;380;381;721;725;751;756;772;786;820;841;908;948;1062;1063;1131;1136;1203;1225;1255;1285;1348;1545;1572;1619;1678;1681;1709;1803;1824;1894;2065;2100;2101;2151	True;True;True;True;True;True;True;True;True;True;True;True;True;True;True;True;True;True;True;True;True;True;True;True;True;True;True;True;True;True;True;True;True;True;True;True;True;True;True;True;True;True;True	75;165;168;273;310;313;368;380;393;394;395;755;759;760;786;791;808;822;857;879;950;990;1111;1112;1182;1187;1254;1276;1307;1338;1402;1610;1638;1639;1694;1757;1760;1791;1888;1911;1982;2159;2194;2195;2247	238;691;701;1129;1130;1220;1227;1408;1409;1435;1473;1474;1475;1476;2515;2516;2524;2525;2680;2696;2697;2698;2740;2773;2945;2946;3104;3105;3268;3362;3752;3753;3939;3949;4129;4130;4180;4287;4288;4387;4545;5295;5349;5350;5351;5571;5572;5742;5746;5827;6108;6109;6189;6415;6999;7135;7136;7137;7138;7280;7281;7282	463;464;1149;1161;1821;1822;1979;1980;1981;1988;2229;2230;2231;2280;2281;2344;2345;2346;2347;2348;4020;4021;4030;4031;4296;4297;4326;4327;4328;4329;4382;4434;4741;4742;4743;4965;4966;5218;5346;5347;5348;6001;6002;6003;6309;6310;6320;6321;6613;6614;6679;6863;6864;7038;7272;8472;8538;8539;8540;8541;8542;8865;8866;8867;8868;9106;9107;9111;9219;9220;9221;9635;9636;9762;10100;10101;11097;11098;11333;1…	464;1149;1161;1821;1980;1988;2230;2280;2345;2346;2348;4020;4030;4296;4327;4382;4434;4743;4965;5218;5347;6002;6003;6310;6320;6614;6679;6863;7038;7272;8472;8540;8868;9107;9111;9219;9636;9762;10101;11098;11334;11340;11559	107;108;109	174;469;962
gi|1304179;gi|545845561	gi|1304179	9;3	6;3	6;3	>gi|1304179|dbj|BAA07817.1| fibrinogen A-alpha-chain, partial [Sus scrofa]	2	9	6	6	28.1	20.5	20.5	47.354	448	448;358	0	43.461	42900000	3300000	47899000	15	15				88	394;626;630;791;935;1160;1773;1827;2142	True;True;True;True;True;False;False;False;True	411;654;655;659;827;977;1211;1858;1914;2238	1533;1534;1535;1536;2242;2243;2257;2258;2784;3326;4008;4009;6012;6013;6014;6015;6194;6195;7259	2444;2445;2446;2447;2448;2449;3597;3598;3618;3619;3620;3621;4445;4446;5290;6414;6415;9506;9507;9508;9509;9510;9767;9768;9769;9770;11533	2449;3597;3621;4446;5290;6415;9507;9767;11533
gi|347300308;gi|335308461;gi|545890164;gi|545845530;gi|1916278;gi|41176612;gi|164614627	gi|347300308;gi|335308461;gi|545890164;gi|545845530	19;19;19;19;2;2;1	19;19;19;19;2;2;1	19;19;19;19;2;2;1	>gi|347300308|ref|NP_001231453.1| fibrinogen gamma chain precursor [Sus scrofa];>gi|335308461|ref|XP_003361238.1| PREDICTED: fibrinogen gamma chain-like isoform X1 [Sus scrofa];>gi|545890164|ref|XP_005658479.1| PREDICTED: fibrinogen gamma chain-like isofor	7	19	19	19	50.7	50.7	50.7	49.618	438	438;438;446;446;77;94;71	0	271.01	82712000	3181200	99493000	72	72				231	89;270;297;517;574;604;656;687;703;708;1046;1097;1100;1875;2281;2282;2353;2378;2566	True;True;True;True;True;True;True;True;True;True;True;True;True;True;True;True;True;True;True	92;281;308;542;602;632;685;718;735;740;1094;1146;1149;1963;2382;2383;2456;2481;2679	281;282;283;284;285;1146;1147;1148;1149;1216;1217;1218;1937;1938;1939;1940;1941;1942;2092;2093;2094;2189;2190;2191;2317;2409;2410;2457;2463;3713;3714;3715;3716;3828;3829;3832;3833;3834;6369;6370;7808;7809;7810;7811;8057;8058;8111;8876;8877;8878	526;527;528;529;530;531;532;1848;1849;1850;1851;1852;1853;1854;1855;1856;1857;1858;1971;1972;1973;1974;1975;1976;1977;3104;3105;3106;3107;3108;3109;3110;3319;3320;3321;3322;3518;3519;3520;3521;3703;3838;3839;3924;3930;5941;5942;5943;5944;6125;6126;6129;6130;6131;10026;10027;10028;12406;12407;12408;12409;12410;12832;12833;12900;14249;14250;14251;14252;14253;14254;14255	528;1849;1977;3106;3319;3518;3703;3838;3924;3930;5944;6125;6130;10028;12406;12407;12833;12900;14250
gi|545857629;gi|6007614	gi|545857629	21;1	21;1	20;0	>gi|545857629|ref|XP_005668813.1| PREDICTED: band 3 anion transport protein [Sus scrofa]	2	21	21	20	35.6	35.6	34.1	95.682	853	853;622	0	187.37	93073000	3102400	166940000	94	94				372	1;313;362;455;502;690;702;951;1076;1077;1310;1332;1380;1688;1985;2011;2034;2071;2334;2371;2581	True;True;True;True;True;True;True;True;True;True;True;True;True;True;True;True;True;True;True;True;True	1;325;326;375;478;527;721;733;734;993;1125;1126;1363;1386;1435;1767;1768;2078;2104;2127;2165;2435;2474;2696	2;3;4;1258;1259;1260;1426;1427;1428;1756;1889;1890;1891;1892;2415;2416;2417;2418;2449;2450;2451;2452;2453;2454;2455;2456;3367;3368;3792;3793;4439;4440;4498;4499;4720;5759;5760;5761;6699;6700;6701;6702;6773;6841;7068;7069;7070;7988;8101;8102;8103;8104;8911	3;4;5;6;7;8;2026;2027;2028;2029;2030;2031;2260;2261;2262;2263;2264;2265;2266;2267;2268;2269;2270;2271;2272;2273;2812;3036;3037;3038;3039;3040;3041;3844;3845;3846;3847;3848;3849;3850;3851;3913;3914;3915;3916;3917;3918;3919;3920;3921;3922;3923;5353;5354;6081;6082;7122;7123;7195;7196;7588;7589;9127;9128;9129;10583;10584;10585;10586;10587;10588;10589;10590;10591;10592;10593;10594;10690;10783;11217;11…	8;2029;2260;2812;3037;3847;3921;5353;6081;6082;7123;7196;7588;9129;10588;10690;10783;11217;12711;12889;14296	146;147;148;149	8;11;211;851
gi|833800;gi|18655907;gi|136192;gi|347582654;gi|189232884;gi|350591529;gi|545864004;gi|41688306;gi|47523782;gi|164614;gi|116488296;gi|164525;gi|41688298;gi|3915882;gi|32130549;gi|17467354;gi|6016307;gi|47523160;gi|1016330	gi|833800;gi|18655907;gi|136192;gi|347582654;gi|189232884;gi|350591529;gi|545864004	38;38;38;38;38;37;34;1;1;1;1;1;1;1;1;1;1;1;1	38;38;38;38;38;37;34;1;1;1;1;1;1;1;1;1;1;1;1	35;35;35;35;35;34;32;0;0;0;0;0;0;0;0;0;1;1;1	>gi|833800|emb|CAA30943.1| transferrin, partial [Sus scrofa];>gi|18655907|pdb|1H76|A Chain A, The Crystal Structure Of Diferric Porcine Serum Transferrin;>gi|136192|sp|P09571.2|TRFE_PIG RecName: Full=Serotransferrin; Short=Transferrin; AltName: Full=Beta-1	19	38	38	35	63.5	63.5	58.9	76.839	696	696;696;696;715;715;714;637;304;686;686;686;703;704;704;704;704;704;704;704	0	323.31	126760000	2947900	321060000	180	180				90	150;202;225;233;303;308;351;384;405;475;477;498;584;660;939;970;1034;1040;1061;1214;1394;1569;1639;1666;1789;1797;1865;2009;2031;2047;2063;2091;2114;2237;2459;2505;2509;2634	True;True;True;True;True;True;True;True;True;True;True;True;True;True;True;True;True;True;True;True;True;True;True;True;True;True;True;True;True;True;True;True;True;True;True;True;True;True	157;209;232;240;314;320;364;398;422;498;500;523;612;689;981;1014;1082;1088;1110;1265;1449;1635;1715;1743;1874;1882;1953;2102;2124;2140;2157;2185;2208;2336;2566;2615;2619;2752	672;673;674;675;812;813;814;1010;1011;1012;1039;1040;1228;1242;1243;1400;1482;1483;1484;1485;1560;1561;1562;1563;1806;1807;1808;1809;1817;1818;1883;2126;2127;2128;2129;2130;2326;2327;2328;3336;3337;3424;3668;3669;3670;3671;3672;3673;3693;3694;3695;3750;3751;4156;4157;4158;4159;4160;4764;5341;5342;5343;5344;5345;5346;5635;5636;5712;5713;6064;6092;6093;6334;6335;6336;6337;6338;6768;6769;6835;6893;6…	1126;1127;1128;1129;1130;1131;1132;1133;1329;1330;1331;1636;1637;1638;1679;1680;1681;1989;2006;2007;2008;2009;2221;2354;2355;2356;2357;2358;2359;2360;2361;2478;2479;2480;2481;2482;2483;2484;2485;2898;2899;2900;2901;2902;2903;2904;2905;2906;2907;2908;2909;2910;2911;2921;2922;2923;3030;3377;3378;3379;3380;3381;3382;3712;3713;3714;3715;3716;3717;5303;5304;5432;5852;5853;5854;5855;5856;5857;5858;5859…	1129;1329;1638;1679;1989;2009;2221;2359;2485;2908;2922;3030;3377;3713;5304;5432;5859;5909;6000;6646;7656;8530;8958;9072;9578;9616;9990;10685;10774;10904;11094;11289;11399;11968;13426;13831;13853;14644
gi|461519;gi|164359;gi|89153;gi|47523850;gi|1890;gi|1892;CON__P15497	gi|461519;gi|164359;gi|89153;gi|47523850;gi|1890;gi|1892	12;12;10;10;10;7;3	12;12;10;10;10;7;3	12;12;10;10;10;7;3	>gi|461519|sp|P18648.4|APOA1_PIG RecName: Full=Apolipoprotein A-I; Short=Apo-AI; Short=ApoA-I; AltName: Full=Apolipoprotein A1; Contains: RecName: Full=Proapolipoprotein A-I; Short=ProapoA-I; Contains: RecName: Full=Truncated apolipoprotein A-I; Flags: Pre	7	12	12	12	48.7	48.7	48.7	30.325	265	265;265;231;264;264;164;265	0	98.951	47561000	2797700	119980000	42	42				107	315;456;519;596;1392;1510;1563;1759;2381;2438;2445;2522	True;True;True;True;True;True;True;True;True;True;True;True	328;479;544;624;1447;1574;1629;1843;2485;2544;2551;2633	1265;1266;1267;1757;1758;1759;1944;1945;1946;1947;2175;2176;2177;4759;4760;5121;5122;5332;5333;5965;5966;5967;8118;8314;8315;8331;8332;8333;8334;8675;8676	2043;2044;2045;2046;2813;2814;2815;2816;2817;3112;3113;3114;3115;3116;3117;3118;3493;3494;3495;7650;7651;8173;8174;8175;8519;8520;8521;9423;9424;9425;9426;9427;12908;13282;13283;13303;13304;13305;13306;13307;13905;13906	2045;2816;3116;3494;7651;8173;8520;9426;12908;13283;13304;13906
gi|75043285;gi|52694689;gi|38455786;gi|10304381	gi|75043285;gi|52694689;gi|38455786	17;17;17;5	17;17;17;5	17;17;17;5	>gi|75043285|sp|Q69DK8.1|C1S_PIG RecName: Full=Complement C1s subcomponent; AltName: Full=C1 esterase; AltName: Full=Complement component 1 subcomponent s; Contains: RecName: Full=Complement C1s subcomponent heavy chain; Contains: RecName: Full=Complement	4	17	17	17	33.9	33.9	33.9	76.101	687	687;687;687;165	0	179.15	63309000	2637900	80945000	47	47				290	61;271;279;619;631;1072;1079;1095;1469;1633;1723;1892;2001;2304;2335;2580;2611	True;True;True;True;True;True;True;True;True;True;True;True;True;True;True;True;True	64;282;290;647;660;1121;1128;1144;1528;1709;1807;1980;2094;2405;2436;2695;2727	202;203;1150;1151;1152;1153;1169;2223;2259;2260;3781;3782;3783;3784;3785;3786;3798;3799;3825;3826;4983;5617;5618;5875;5876;6410;6744;6745;6746;6747;6748;7895;7896;7897;7898;7989;7990;7991;7992;8909;8910;9023	391;392;393;1859;1860;1861;1862;1863;1898;3574;3622;3623;3624;6068;6069;6070;6071;6072;6073;6074;6075;6089;6090;6122;6123;7971;8936;8937;9293;9294;10092;10656;10657;10658;10659;10660;12586;12587;12588;12589;12713;12714;12715;12716;14294;14295;14458	391;1860;1898;3574;3624;6070;6089;6122;7971;8936;9294;10092;10656;12589;12716;14295;14458
gi|558859;gi|2136522	gi|558859;gi|2136522	2;2	1;1	1;1	>gi|558859|gb|AAA67007.1| Ig heavy chain variable VDJ region, partial [Sus scrofa];>gi|2136522|pir||I47182 Ig heavy chain variable VDJ region - pig (fragment)	2	2	1	1	16.4	10.7	10.7	15.346	140	140;140	0	59.177	13375000	2229200	18543000	8	8				149	386;2254	True;False	400;401;2353	1489;1490;1491;1492;1493;1494;7609;7610	2366;2367;2368;2369;2370;2371;2372;2373;12066;12067	2367;12067	58	101
gi|41323549;gi|41323657;gi|41323507;gi|41323605	gi|41323549;gi|41323657;gi|41323507;gi|41323605	4;3;3;2	2;1;1;1	1;0;0;0	>gi|41323549|gb|AAR99932.1| immunoglobulin kappa variable region, partial [Sus scrofa];>gi|41323657|gb|AAR99986.1| immunoglobulin kappa variable region, partial [Sus scrofa];>gi|41323507|gb|AAR99911.1| immunoglobulin kappa variable region, partial [Sus scr	4	4	2	1	47.3	30.5	19.1	14.123	131	131;130;131;131	0	36.649	12924000	2153900	21441000	13	13				299	733;1407;2039;2300	False;False;True;True	768;1462;2132;2401	2548;2549;2550;2551;2552;2553;4828;4829;6857;7885;7886;7887;7888;7889;7890	4065;4066;4067;4068;4069;4070;4071;4072;4073;4074;4075;4076;4077;4078;4079;4080;7757;7758;7759;10805;12570;12571;12572;12573;12574;12575;12576;12577;12578;12579;12580;12581	4069;7757;10805;12577
gi|119662953;gi|119663071	gi|119662953;gi|119663071	4;3	1;1	0;0	>gi|119662953|emb|CAJ45418.1| immunoglobulin heavy chain variable region, partial [Sus scrofa];>gi|119663071|emb|CAJ45480.1| immunoglobulin heavy chain variable region, partial [Sus scrofa]	2	4	1	0	60	15.8	0	12.815	120	120;121	0	18.705	10161000	2032300	12391000	3	3				61	389;868;1485;1535	False;False;True;False	405;406;907;1544;1600	1507;1508;1509;1510;1511;1512;1513;1514;1515;1516;1517;1518;1519;1520;3158;3159;3160;3161;5038;5039;5040;5041;5200;5201;5202;5203;5204;5205;5206;5207;5208;5209;5210;5211;5212;5213;5214;5215;5216;5217;5218;5219;5220;5221;5222;5223;5224;5225;5226;5227;5228;5229;5230;5231;5232;5233;5234;5235;5236;5237;5238;5239;5240;5241;5242;5243;5244;5245;5246;5247;5248;5249;5250;5251;5252;5253;5254;5255;5256;5257…	2398;2399;2400;2401;2402;2403;2404;2405;2406;2407;2408;2409;2410;2411;2412;2413;2414;2415;2416;2417;2418;2419;2420;2421;2422;2423;2424;2425;5032;5033;5034;5035;5036;8062;8063;8064;8065;8298;8299;8300;8301;8302;8303;8304;8305;8306;8307;8308;8309;8310;8311;8312;8313;8314;8315;8316;8317;8318;8319;8320;8321;8322;8323;8324;8325;8326;8327;8328;8329;8330;8331;8332;8333;8334;8335;8336;8337;8338;8339;8340…	2419;5035;8062;8300	32	83
gi|54888450;gi|119662999;gi|119663035;gi|119662897;gi|119662963;gi|54888566;gi|54888560;gi|54888406;gi|119662883;gi|1022949;gi|1022933;gi|3171215;gi|119662981;gi|119663059;gi|119662997;gi|119662901;gi|119662909;gi|119663003;gi|119663005;gi|571383;gi|2136529;gi|1022947	gi|54888450;gi|119662999;gi|119663035;gi|119662897;gi|119662963;gi|54888566;gi|54888560;gi|54888406;gi|119662883;gi|1022949;gi|1022933;gi|3171215;gi|119662981;gi|119663059;gi|119662997;gi|119662901;gi|119662909;gi|119663003;gi|119663005;gi|571383;gi|2136529;gi|1022947	5;4;4;4;4;4;4;4;4;4;4;3;3;3;3;3;3;3;3;3;3;3	2;1;1;1;1;1;1;1;1;1;1;0;0;1;0;0;0;1;1;0;0;1	0;0;0;0;0;0;0;0;0;0;0;0;0;0;0;0;0;0;0;0;0;0	>gi|54888450|emb|CAH68460.1| immunoglobulin heavy chain variable region, partial [Sus scrofa];>gi|119662999|emb|CAJ45441.1| immunoglobulin heavy chain variable region, partial [Sus scrofa];>gi|119663035|emb|CAJ45462.1| immunoglobulin heavy chain variable r	22	5	2	0	64.8	25.8	0	13.952	128	128;117;119;121;123;127;127;131;131;147;148;117;119;124;125;125;126;127;130;144;144;145	0	23.827	11858000	1976300	22566000	14	14				399	389;877;1483;1535;2112	False;True;False;False;True	405;406;916;1542;1600;2206	1507;1508;1509;1510;1511;1512;1513;1514;1515;1516;1517;1518;1519;1520;3172;3173;3174;3175;3176;3177;5034;5035;5036;5200;5201;5202;5203;5204;5205;5206;5207;5208;5209;5210;5211;5212;5213;5214;5215;5216;5217;5218;5219;5220;5221;5222;5223;5224;5225;5226;5227;5228;5229;5230;5231;5232;5233;5234;5235;5236;5237;5238;5239;5240;5241;5242;5243;5244;5245;5246;5247;5248;5249;5250;5251;5252;5253;5254;5255;5256…	2398;2399;2400;2401;2402;2403;2404;2405;2406;2407;2408;2409;2410;2411;2412;2413;2414;2415;2416;2417;2418;2419;2420;2421;2422;2423;2424;2425;5050;5051;5052;5053;5054;5055;5056;5057;5058;5059;5060;8057;8058;8059;8060;8298;8299;8300;8301;8302;8303;8304;8305;8306;8307;8308;8309;8310;8311;8312;8313;8314;8315;8316;8317;8318;8319;8320;8321;8322;8323;8324;8325;8326;8327;8328;8329;8330;8331;8332;8333;8334…	2419;5053;8060;8300;11390	32	83
gi|441477597;gi|73760262;gi|561818	gi|441477597;gi|73760262;gi|561818	12;8;8	1;0;0	0;0;0	>gi|441477597|dbj|BAM75554.1| IgG heavy chain precursor [Sus scrofa];>gi|73760262|dbj|BAE20056.1| immunoglobulin G CH2 and CH3 chain, partial [Sus scrofa];>gi|561818|gb|AAA51293.1| This CDS feature is included to show the translation of the corresponding C	3	12	1	0	47.4	4.1	0	50.876	466	466;221;328	0	19.594	32868000	1933400	44180000	14	14				317	186;366;389;427;580;1481;2080;2155;2207;2234;2446;2494	False;False;False;False;False;True;False;False;False;False;False;False	193;379;405;406;446;447;608;1540;2174;2251;2305;2333;2552;2604	755;756;757;1434;1507;1508;1509;1510;1511;1512;1513;1514;1515;1516;1517;1518;1519;1520;1634;1635;1636;1637;1638;1639;2106;2107;2108;2109;2110;2111;5021;5022;5023;5024;5025;5026;5027;5028;5029;5030;5031;7085;7086;7087;7088;7089;7090;7091;7092;7291;7292;7293;7294;7295;7296;7297;7298;7299;7300;7457;7458;7536;7537;7538;7539;7540;7541;7542;7543;7544;7545;8335;8593;8594;8595;8596;8597;8598	1227;1228;1229;2279;2398;2399;2400;2401;2402;2403;2404;2405;2406;2407;2408;2409;2410;2411;2412;2413;2414;2415;2416;2417;2418;2419;2420;2421;2422;2423;2424;2425;2601;2602;2603;2604;2605;2606;2607;2608;3334;3335;3336;3337;3338;3339;3340;3341;3342;3343;3344;3345;3346;3347;3348;3349;3350;8041;8042;8043;8044;8045;8046;8047;8048;8049;8050;8051;8052;8053;8054;11238;11239;11240;11241;11242;11243;11244;11…	1228;2279;2419;2604;3347;8054;11239;11572;11839;11947;13308;13791	32;46	102;269
gi|48374067;gi|4096979;gi|3024051;gi|1836014;gi|1588326;gi|350591216	gi|48374067;gi|4096979;gi|3024051;gi|1836014;gi|1588326	29;29;29;29;29;4	29;29;29;29;29;4	24;24;24;24;24;4	>gi|48374067|ref|NP_001001537.1| inter-alpha-trypsin inhibitor heavy chain H4 precursor [Sus scrofa];>gi|4096979|gb|AAD00024.1| inter-alpha-trypsin inhibitor family heavy chain-related protein [Sus scrofa];>gi|3024051|sp|P79263.1|ITIH4_PIG RecName: Full=In	6	29	29	24	40.2	40.2	34.4	102.14	921	921;921;921;921;921;102	0	255.3	98522000	1931800	149020000	77	77				102	66;141;179;403;501;618;650;693;745;926;929;1007;1146;1187;1245;1300;1415;1524;1550;1559;1716;1760;2012;2074;2244;2257;2463;2464;2584	True;True;True;True;True;True;True;True;True;True;True;True;True;True;True;True;True;True;True;True;True;True;True;True;True;True;True;True;True	69;148;186;420;526;646;679;724;780;968;971;1052;1197;1238;1296;1353;1471;1588;1615;1624;1798;1844;2105;2168;2343;2356;2570;2571;2699	222;441;737;738;1553;1554;1888;2221;2222;2308;2425;2426;2427;2428;2429;2585;3304;3305;3306;3312;3529;3530;3531;3973;3974;4089;4090;4091;4234;4235;4236;4422;4423;4847;4848;4849;5164;5302;5303;5304;5325;5326;5846;5847;5968;6774;6775;7073;7074;7575;7576;7577;7615;7616;8417;8418;8419;8420;8421;8422;8423;8927;8928;8929;8930	445;739;1204;1205;2467;2468;3035;3572;3573;3689;3859;3860;3861;3862;3863;3864;3865;4120;5264;5265;5266;5273;5620;5621;5622;5623;6362;6363;6556;6557;6558;6787;6788;6789;6790;7104;7105;7781;7782;7783;8248;8479;8480;8481;8512;8513;9248;9249;9428;10691;10692;11224;11225;12008;12009;12010;12011;12012;12073;12074;12075;12076;12077;12078;13435;13436;13437;13438;13439;13440;13441;13442;13443;14329;14330;…	445;739;1204;2468;3035;3572;3689;3864;4120;5266;5273;5620;6363;6556;6788;7105;7783;8248;8479;8512;9248;9428;10691;11224;12009;12077;13435;13442;14335
gi|147780441;gi|38455780;CON__P01030;CON__ENSEMBL:ENSBTAP00000007350	gi|147780441	57;13;3;3	57;13;3;3	1;0;0;0	>gi|147780441|emb|CAN59660.1| complement component 4A [Sus scrofa]	4	57	57	1	48.7	48.7	0.6	192.39	1741	1741;517;1741;1742	0	323.31	164180000	1931600	303490000	174	174				93	45;131;147;218;221;275;321;334;378;446;474;476;481;611;637;641;647;672;685;706;760;846;860;923;930;1008;1124;1234;1316;1327;1335;1451;1458;1467;1522;1533;1598;1640;1654;1831;1876;1922;1954;2014;2054;2057;2148;2195;2260;2297;2308;2316;2331;2347;2403;2440;2452	True;True;True;True;True;True;True;True;True;True;True;True;True;True;True;True;True;True;True;True;True;True;True;True;True;True;True;True;True;True;True;True;True;True;True;True;True;True;True;True;True;True;True;True;True;True;True;True;True;True;True;True;True;True;True;True;True	47;136;154;225;228;286;334;347;391;392;467;497;499;504;639;666;670;676;701;716;738;795;885;899;965;972;1053;1175;1285;1370;1381;1389;1509;1516;1526;1586;1598;1669;1716;1731;1918;1964;2013;2046;2107;2147;2151;2244;2293;2359;2398;2409;2417;2432;2450;2507;2546;2558	157;408;409;410;411;662;663;991;1004;1165;1282;1365;1366;1367;1470;1471;1472;1686;1805;1810;1811;1812;1813;1814;1815;1816;1824;1825;1826;1827;1828;1829;2209;2279;2280;2281;2290;2302;2361;2362;2404;2405;2406;2407;2460;2702;2703;2704;2705;3117;3118;3139;3140;3299;3300;3301;3313;3314;3532;3533;3534;3922;3923;4195;4456;4487;4488;4489;4490;4509;4932;4933;4934;4949;4950;4951;4952;4953;4954;4955;4956;49…	319;697;698;699;700;1113;1114;1613;1630;1894;2064;2182;2183;2184;2341;2342;2343;2672;2897;2912;2913;2914;2915;2916;2917;2918;2919;2920;2930;2931;2932;2933;2934;2935;2936;3559;3658;3659;3660;3669;3682;3775;3776;3833;3834;3835;3836;3927;4333;4334;4335;4336;4979;4980;4981;5007;5008;5259;5260;5261;5274;5275;5624;5625;5626;5627;6288;6289;6696;7140;7182;7183;7184;7185;7186;7210;7900;7901;7902;7924;7925…	319;699;1114;1613;1630;1894;2064;2184;2341;2672;2897;2914;2931;3559;3658;3669;3682;3776;3833;3927;4333;4980;5008;5260;5274;5625;6289;6696;7140;7182;7210;7900;7924;7965;8244;8287;8652;8959;9034;9784;10029;10310;10427;10700;11047;11062;11553;11779;12081;12559;12608;12659;12697;12786;13071;13285;13335	40	1126
gi|157382506;gi|545825420	gi|157382506;gi|545825420	2;2	1;1	1;1	>gi|157382506|gb|ABV48743.1| keratin 18, partial [Sus scrofa];>gi|545825420|ref|XP_005652636.1| PREDICTED: keratin, type I cytoskeletal 18, partial [Sus scrofa]	2	2	1	1	10.1	5.7	5.7	18.049	159	159;392	0	14.568	22988000	1915700	62489000	4	4				99	170;1265	True;False	177;1317	718;719;720;4328;4329;4330;4331	1180;1181;1182;1183;6912;6913;6914;6915;6916;6917;6918;6919;6920;6921;6922;6923	1181;6915
gi|441477631;gi|441477633;gi|166236027	gi|441477631;gi|441477633;gi|166236027	13;11;9	2;1;0	2;1;0	>gi|441477631|dbj|BAM75570.1| IgG heavy chain precursor [Sus scrofa];>gi|441477633|dbj|BAM75571.1| IgG heavy chain precursor, partial [Sus scrofa];>gi|166236027|gb|ABY85805.1| immunoglobulin gamma chain 6b, partial [Sus scrofa]	3	13	2	2	37.9	8.2	8.2	50.817	464	464;364;320	0	66.36	34320000	1906700	61316000	8	8				324	248;366;385;427;583;1198;1465;1535;2004;2095;2234;2447;2493	False;False;True;False;False;False;True;False;False;False;False;False;False	258;379;399;446;447;611;1249;1524;1600;2097;2189;2333;2553;2603	1091;1092;1093;1094;1095;1096;1097;1098;1434;1486;1487;1488;1634;1635;1636;1637;1638;1639;2123;2124;2125;4119;4120;4121;4122;4972;4973;4974;4975;5200;5201;5202;5203;5204;5205;5206;5207;5208;5209;5210;5211;5212;5213;5214;5215;5216;5217;5218;5219;5220;5221;5222;5223;5224;5225;5226;5227;5228;5229;5230;5231;5232;5233;5234;5235;5236;5237;5238;5239;5240;5241;5242;5243;5244;5245;5246;5247;5248;5249;5250…	1770;1771;1772;1773;1774;1775;1776;1777;2279;2362;2363;2364;2365;2601;2602;2603;2604;2605;2606;2607;2608;3374;3375;3376;6597;6598;6599;6600;7955;7956;7957;7958;8298;8299;8300;8301;8302;8303;8304;8305;8306;8307;8308;8309;8310;8311;8312;8313;8314;8315;8316;8317;8318;8319;8320;8321;8322;8323;8324;8325;8326;8327;8328;8329;8330;8331;8332;8333;8334;8335;8336;8337;8338;8339;8340;8341;8342;8343;8344;8345…	1773;2279;2362;2604;3375;6598;7956;8300;10665;11315;11947;13311;13765	46	267
gi|675970360;gi|675970307;gi|675970216;gi|675970165;gi|545808636;gi|545808634;gi|47523498;gi|302393726;gi|1628608;gi|675970405;gi|675970259;gi|545817523;gi|140083661;gi|545860645;gi|545860642;gi|545860639;gi|157427740;gi|156105185;gi|156105183;gi|164708;gi|545868587;gi|753702918;gi|545868585;gi|350592420;gi|350592418;gi|350592416;gi|350592414;gi|302595945;gi|545868579	gi|675970360;gi|675970307;gi|675970216;gi|675970165;gi|545808636;gi|545808634;gi|47523498;gi|302393726;gi|1628608;gi|675970405;gi|675970259;gi|545817523;gi|140083661;gi|545860645;gi|545860642;gi|545860639;gi|157427740;gi|156105185;gi|156105183;gi|164708;gi|545868587;gi|753702918;gi|545868585;gi|350592420;gi|350592418;gi|350592416;gi|350592414;gi|302595945;gi|545868579	4;4;4;4;4;4;4;4;4;4;4;4;4;4;4;4;4;4;4;4;4;4;4;4;4;4;4;4;4	4;4;4;4;4;4;4;4;4;4;4;4;4;4;4;4;4;4;4;4;4;4;4;4;4;4;4;4;4	4;4;4;4;4;4;4;4;4;4;4;4;4;4;4;4;4;4;4;4;4;4;4;4;4;4;4;4;4	>gi|675970360|pdb|4W27|MM Chain m, Structure Of The Translating Mammalian Ribosome-sec61 Complex (this Entry Contains The Large Ribosomal Subunit Proteins);>gi|675970307|pdb|4W25|MM Chain m, Structure Of The Idle Mammalian Ribosome-sec61 Complex (this Entr	29	4	4	4	31.2	31.2	31.2	14.728	128	128;128;128;128;128;128;128;128;128;156;156;204;209;229;229;229;229;229;229;255;381;533;533;533;533;533;533;533;536	0	31.265	10718000	1786400	19389000	8	8				91	524;525;2150;2180	True;True;True;True	549;550;2246;2276	1964;1965;1966;7277;7278;7279;7365;7366	3153;3154;3155;11555;11556;11557;11702;11703	3153;3154;11557;11702
gi|21703157;gi|41323601;gi|41323577;gi|41323571;gi|41323625;gi|41323595;gi|41323585;gi|41323615;gi|41323613	gi|21703157;gi|41323601;gi|41323577;gi|41323571	4;2;2;2;1;1;1;1;1	3;1;1;1;0;0;0;1;1	2;1;1;1;0;0;0;1;1	>gi|21703157|gb|AAM76076.1|AF334738_1 immunoglobulin kappa light chain VJ region, partial [Sus scrofa];>gi|41323601|gb|AAR99958.1| immunoglobulin kappa variable region, partial [Sus scrofa];>gi|41323577|gb|AAR99946.1| immunoglobulin kappa variable region,	9	4	3	2	55.5	43.6	35.5	11.858	110	110;131;131;131;130;130;130;131;131	0	44.253	12456000	1779400	17687000	13	13				158	92;733;1407;2299	True;False;True;True	95;768;1462;2400	291;292;293;294;2548;2549;2550;2551;2552;2553;4828;4829;7882;7883;7884	538;539;540;541;542;543;4065;4066;4067;4068;4069;4070;4071;4072;4073;4074;4075;4076;4077;4078;4079;4080;7757;7758;7759;12566;12567;12568;12569	541;4069;7757;12566
gi|545890182	gi|545890182	1	1	1	>gi|545890182|ref|XP_005658483.1| PREDICTED: kinesin-like protein KIF22-like [Sus scrofa]	1	1	1	1	1.5	1.5	1.5	71.143	648	648	0	7.1311	57392000	1639800	156010000	5	5				391	211	True	218	976	1583;1584;1585;1586;1587	1584	153	579
gi|54888484	gi|54888484	4	1	0	>gi|54888484|emb|CAH68477.1| immunoglobulin heavy chain variable region, partial [Sus scrofa]	1	4	1	0	59.2	19.2	0	13.412	125	125	0	24.12	7591000	1518200	7591000	3	3				400	307;872;1475;1535	False;True;False;False	318;319;911;1534;1600	1235;1236;1237;1238;1239;1240;1241;3166;3167;5009;5010;5200;5201;5202;5203;5204;5205;5206;5207;5208;5209;5210;5211;5212;5213;5214;5215;5216;5217;5218;5219;5220;5221;5222;5223;5224;5225;5226;5227;5228;5229;5230;5231;5232;5233;5234;5235;5236;5237;5238;5239;5240;5241;5242;5243;5244;5245;5246;5247;5248;5249;5250;5251;5252;5253;5254;5255;5256;5257;5258;5259;5260;5261;5262;5263;5264;5265;5266;5267;5268…	1996;1997;1998;1999;2000;2001;2002;2003;2004;2005;5041;5042;5043;8029;8030;8298;8299;8300;8301;8302;8303;8304;8305;8306;8307;8308;8309;8310;8311;8312;8313;8314;8315;8316;8317;8318;8319;8320;8321;8322;8323;8324;8325;8326;8327;8328;8329;8330;8331;8332;8333;8334;8335;8336;8337;8338;8339;8340;8341;8342;8343;8344;8345;8346;8347;8348;8349;8350;8351;8352;8353;8354;8355;8356;8357;8358;8359;8360;8361;8362…	1997;5043;8029;8300	59	85
gi|545890540;gi|38455776	gi|545890540;gi|38455776	17;9	17;9	17;9	>gi|545890540|ref|XP_005658602.1| PREDICTED: LOW QUALITY PROTEIN: complement C1r subcomponent [Sus scrofa];>gi|38455776|gb|AAR20889.1| complement C1r, partial [Sus scrofa]	2	17	17	17	33.5	33.5	33.5	79.789	708	708;390	0	179.7	41731000	1391000	49686000	34	34				392	96;509;553;570;655;963;1229;1328;1365;1538;1673;1744;1763;1819;2166;2398;2606	True;True;True;True;True;True;True;True;True;True;True;True;True;True;True;True;True	99;534;579;598;684;1006;1280;1382;1420;1603;1750;1828;1847;1906;2262;2502;2722	314;315;1914;2047;2048;2087;2316;3407;3408;3409;3410;4188;4491;4492;4633;5280;5723;5724;5929;5973;5974;5975;6159;7331;7332;7333;7334;8192;8193;9010	581;582;3077;3266;3267;3314;3702;5409;5410;5411;5412;5413;6687;7187;7188;7431;8440;9083;9084;9085;9370;9371;9435;9436;9437;9726;11652;11653;11654;11655;11656;13045;13046;14443	582;3077;3266;3314;3702;5410;6687;7187;7431;8440;9084;9370;9437;9726;11653;13045;14443
gi|237681310;gi|226442049;gi|195969551	gi|237681310;gi|226442049;gi|195969551	4;4;4	4;4;4	4;4;4	>gi|237681310|ref|NP_001153743.1| protein S100-A8 [Sus scrofa];>gi|226442049|gb|ACO57614.1| calcium-binding protein A8 [Sus scrofa];>gi|195969551|gb|ACG60600.1| calcium-binding protein S100A8 [Sus scrofa]	3	4	4	4	56.2	56.2	56.2	10.416	89	89;89;89	0	41.547	8298100	1383000	16667000	20	20				141	905;1400;1588;2356	True;True;True;True	947;1455;1656;1657;2459	3264;4775;5382;5383;5384;5385;5386;5387;8063;8064;8065;8066;8067;8068	5209;7679;8585;8586;8587;8588;8589;8590;8591;8592;8593;8594;8595;12838;12839;12840;12841;12842;12843;12844	5209;7679;8595;12840	54	1
gi|47522770;gi|3023523;gi|164409;CON__P17697;gi|90569238;gi|390979789	gi|47522770;gi|3023523;gi|164409	12;12;12;4;3;1	12;12;12;4;3;1	12;12;12;4;3;1	>gi|47522770|ref|NP_999136.1| clusterin precursor [Sus scrofa];>gi|3023523|sp|Q29549.1|CLUS_PIG RecName: Full=Clusterin; AltName: Full=CP40; AltName: Full=Complement cytolysis inhibitor; Short=CLI; Contains: RecName: Full=Clusterin beta chain; Contains: Re	6	12	12	12	35.7	35.7	35.7	51.774	446	446;446;446;439;110;66	0	135.33	30014000	1364300	55845000	32	32				111	181;561;579;711;937;1058;1326;1551;1800;1981;2173;2635	True;True;True;True;True;True;True;True;True;True;True;True	188;587;588;607;744;979;1107;1380;1616;1885;2074;2269;2753	742;743;744;745;2061;2062;2063;2064;2102;2103;2104;2105;2471;2472;2473;3328;3329;3330;3746;3747;4486;5305;6102;6103;6687;6688;7343;7344;7345;9121;9122;9123	1209;1210;1211;1212;3280;3281;3282;3283;3284;3330;3331;3332;3333;3940;3941;3942;5292;5293;5294;5994;5995;7181;8482;9627;9628;10563;10564;11665;11666;11667;14645;14646;14647	1211;3282;3332;3940;5292;5994;7181;8482;9627;10564;11665;14647
gi|585702;gi|753703362;gi|311255383;gi|545845459;gi|350597066	gi|585702;gi|753703362;gi|311255383;gi|545845459;gi|350597066	2;2;2;2;1	2;2;2;2;1	2;2;2;2;1	>gi|585702|sp|P30034.2|PLF4_PIG RecName: Full=Platelet factor 4; Short=PF-4; AltName: Full=C-X-C motif chemokine 4;>gi|753703362|gb|JAG69292.1| platelet factor 4 [Sus scrofa domesticus];>gi|311255383|ref|XP_003126209.1| PREDICTED: platelet factor 4 [Sus sc	5	2	2	2	38.9	38.9	38.9	9.6443	90	90;122;122;250;311	0	23.44	6667400	1333500	18124000	6	6				189	999;1052	True;True	1044;1101	3494;3495;3496;3497;3730;3731	5547;5548;5549;5550;5977;5978	5547;5978
gi|545855278;gi|545890251	gi|545855278;gi|545890251	8;4	8;4	8;4	>gi|545855278|ref|XP_005668528.1| PREDICTED: BTB/POZ domain-containing protein KCTD12 [Sus scrofa];>gi|545890251|ref|XP_005658502.1| PREDICTED: BTB/POZ domain-containing protein KCTD12-like [Sus scrofa]	2	8	8	8	33.7	33.7	33.7	35.838	326	326;208	0	75.707	20722000	1295100	56328000	19	19				371	277;370;462;712;1185;1339;1576;2016	True;True;True;True;True;True;True;True	288;383;485;745;1236;1393;1644;2109	1167;1441;1442;1766;1767;1768;2474;2475;4084;4514;4515;4516;5362;5363;6785	1896;2294;2295;2824;2825;2826;2827;3943;3944;3945;6547;7215;7216;7217;7218;8560;8561;8562;10706	1896;2295;2826;3944;6547;7216;8562;10706
gi|160690445;gi|89275684;gi|295656640;gi|195562209;gi|21538357	gi|160690445;gi|89275684;gi|295656640;gi|195562209;gi|21538357	20;19;19;19;19	3;3;3;3;3	3;3;3;3;3	>gi|160690445|gb|ABX46063.1| complement component C3d, partial [Sus scrofa];>gi|89275684|gb|ABD66221.1| complement component c3d, partial [Sus scrofa];>gi|295656640|gb|ADG26759.1| complement component C3d, partial [Sus scrofa];>gi|195562209|gb|ACG50176.1|	5	20	3	3	66.4	12	12	37.562	333	333;296;296;296;300	0	86.475	23239000	1291000	39959000	24	24				103	317;322;338;365;447;975;1217;1290;1516;1554;1555;1697;1746;1771;1867;1868;1869;2328;2512;2633	False;False;False;False;False;False;False;False;True;True;True;False;False;False;False;False;False;False;False;False	330;335;351;378;468;1019;1268;1343;1580;1619;1620;1777;1830;1856;1955;1956;1957;2429;2622;2751	1270;1271;1272;1283;1284;1285;1286;1375;1376;1377;1432;1433;1687;1688;1689;1690;1691;1692;1693;1694;3439;3440;3441;3442;4165;4166;4167;4168;4169;4170;4171;4405;4406;4407;4408;5132;5133;5134;5135;5311;5312;5313;5314;5315;5316;5317;5318;5319;5788;5789;5790;5791;5931;5932;6003;6004;6005;6006;6007;6008;6009;6340;6341;6342;6343;6344;6345;6346;6347;6348;6349;6350;6351;6352;6353;6354;6355;6356;6357;6358…	2049;2050;2051;2065;2066;2067;2068;2069;2070;2071;2072;2073;2074;2075;2192;2193;2194;2277;2278;2673;2674;2675;2676;2677;2678;2679;2680;2681;2682;2683;2684;2685;5463;5464;5465;5466;5467;5468;5469;5470;5471;5472;5473;5474;6656;6657;6658;6659;6660;6661;6662;6663;6664;6665;6666;7070;7071;7072;7073;7074;7075;7076;7077;7078;7079;7080;7081;7082;8190;8191;8192;8193;8194;8488;8489;8490;8491;8492;8493;8494…	2050;2071;2192;2278;2674;5464;6662;7076;8190;8495;8506;9176;9374;9497;9994;10005;10010;12684;13867;14642
gi|119663033	gi|119663033	5	2	1	>gi|119663033|emb|CAJ45461.1| immunoglobulin heavy chain variable region, partial [Sus scrofa]	1	5	2	1	60.6	17.3	10.2	13.468	127	127	0	14.243	6427800	1285600	13074000	9	9				69	753;864;1481;1535;2216	False;True;False;False;True	788;903;1540;1600;2314	2682;2683;2684;3149;3150;3151;3152;5021;5022;5023;5024;5025;5026;5027;5028;5029;5030;5031;5200;5201;5202;5203;5204;5205;5206;5207;5208;5209;5210;5211;5212;5213;5214;5215;5216;5217;5218;5219;5220;5221;5222;5223;5224;5225;5226;5227;5228;5229;5230;5231;5232;5233;5234;5235;5236;5237;5238;5239;5240;5241;5242;5243;5244;5245;5246;5247;5248;5249;5250;5251;5252;5253;5254;5255;5256;5257;5258;5259;5260;5261…	4299;4300;4301;5019;5020;5021;5022;5023;5024;5025;5026;8041;8042;8043;8044;8045;8046;8047;8048;8049;8050;8051;8052;8053;8054;8298;8299;8300;8301;8302;8303;8304;8305;8306;8307;8308;8309;8310;8311;8312;8313;8314;8315;8316;8317;8318;8319;8320;8321;8322;8323;8324;8325;8326;8327;8328;8329;8330;8331;8332;8333;8334;8335;8336;8337;8338;8339;8340;8341;8342;8343;8344;8345;8346;8347;8348;8349;8350;8351;8352…	4301;5023;8054;8300;11870
gi|790202;gi|62287931;gi|545870150;gi|545801458;gi|281427360;gi|268607671;gi|210077998;gi|210077996;gi|210077994;gi|545871132;gi|257470979;gi|254771936;gi|88861940;gi|2997739	gi|790202;gi|62287931;gi|545870150;gi|545801458;gi|281427360;gi|268607671;gi|210077998;gi|210077996;gi|210077994;gi|545871132;gi|257470979;gi|254771936	9;9;9;9;9;9;9;9;9;8;8;8;4;4	1;1;1;1;1;1;1;1;1;1;1;1;1;1	1;1;1;1;1;1;1;1;1;1;1;1;1;1	>gi|790202|gb|AAC48692.1| skeletal alpha actin [Sus scrofa];>gi|62287931|sp|P68137.1|ACTS_PIG RecName: Full=Actin, alpha skeletal muscle; AltName: Full=Alpha-actin-1; Flags: Precursor;>gi|545870150|ref|XP_005671033.1| PREDICTED: actin, alpha skeletal muscl	14	9	1	1	27.9	4.2	4.2	42.051	377	377;377;377;377;377;377;377;377;377;377;377;377;73;82	0	8.9762	24967000	1248400	46707000	10	10				146	60;205;373;423;546;1022;1183;2076;2605	False;False;False;False;False;False;False;False;True	63;212;386;442;572;1068;1069;1070;1234;2170;2721	198;199;200;201;818;1451;1452;1453;1454;1455;1456;1457;1618;1619;1620;1621;2036;2037;2038;2039;3625;3626;3627;3628;3629;3630;3631;4072;4073;4074;4075;4076;4077;4078;4079;7076;7077;7078;7079;7080;7081;9006;9007;9008;9009	384;385;386;387;388;389;390;1335;2309;2310;2311;2312;2313;2314;2315;2316;2317;2318;2319;2320;2321;2322;2579;2580;2581;2582;2583;2584;2585;3251;3252;3253;3254;3255;3256;3257;3258;5780;5781;5782;5783;5784;5785;5786;5787;5788;5789;5790;5791;5792;6517;6518;6519;6520;6521;6522;6523;6524;6525;6526;6527;6528;6529;6530;6531;6532;6533;11227;11228;11229;11230;11231;11232;11233;11234;14433;14434;14435;14436…	385;1335;2314;2585;3252;5786;6526;11228;14434	41;42	46;49
gi|311256211	gi|311256211	43	43	42	>gi|311256211|ref|XP_001925210.2| PREDICTED: alpha-2-macroglobulin [Sus scrofa]	1	43	43	42	38.7	38.7	38.1	167.06	1490	1490	0	323.31	95026000	1234100	179720000	147	147				190	91;115;199;203;217;219;250;430;431;512;565;620;726;758;797;887;934;957;993;1030;1070;1073;1262;1311;1448;1457;1526;1612;1622;1661;1795;1914;1949;2020;2021;2026;2077;2111;2246;2383;2420;2458;2576	True;True;True;True;True;True;True;True;True;True;True;True;True;True;True;True;True;True;True;True;True;True;True;True;True;True;True;True;True;True;True;True;True;True;True;True;True;True;True;True;True;True;True	94;119;206;210;224;226;260;450;451;537;593;648;761;793;833;834;926;976;1000;1037;1078;1119;1122;1314;1364;1506;1515;1590;1686;1697;1738;1880;2004;2040;2113;2114;2119;2171;2205;2345;2487;2525;2565;2689	287;288;289;290;356;357;358;359;360;361;807;815;816;990;992;993;994;995;1100;1101;1644;1645;1646;1647;1648;1917;1918;1919;1920;2074;2224;2225;2226;2526;2700;2804;2805;3201;3202;3203;3204;3324;3325;3387;3388;3475;3476;3656;3657;3658;3659;3777;3778;3779;3787;3788;4320;4321;4322;4323;4441;4442;4443;4444;4445;4446;4447;4448;4924;4925;4926;4927;4946;4947;4948;5168;5169;5548;5549;5550;5581;5582;5583;55…	534;535;536;537;640;641;642;643;644;645;1323;1332;1333;1612;1614;1615;1616;1617;1779;1780;2614;2615;2616;2617;2618;3080;3081;3082;3083;3297;3575;3576;3577;4032;4331;4486;4487;5094;5095;5096;5097;5098;5288;5289;5379;5380;5523;5524;5831;5832;5833;5834;5835;6064;6065;6066;6076;6077;6904;6905;6906;6907;7124;7125;7126;7127;7128;7129;7130;7131;7132;7889;7890;7891;7892;7893;7894;7921;7922;7923;8252;8253…	536;641;1323;1333;1612;1614;1779;2614;2616;3080;3297;3575;4032;4331;4487;5097;5289;5380;5523;5835;6066;6077;6907;7130;7889;7922;8253;8838;8880;9051;9610;10274;10409;10721;10729;10760;11235;11382;12015;12911;13187;13420;14285	66	731
gi|545891985;gi|545875779;gi|350593938	gi|545891985;gi|545875779;gi|350593938	1;1;1	1;1;1	1;1;1	>gi|545891985|ref|XP_005674453.1| PREDICTED: cullin-3-like [Sus scrofa];>gi|545875779|ref|XP_005672311.1| PREDICTED: cullin-3 isoform X2 [Sus scrofa];>gi|350593938|ref|XP_003133733.3| PREDICTED: cullin-3 isoform X1 [Sus scrofa]	3	1	1	1	3.5	3.5	3.5	66.589	575	575;702;768	1	-2	37139000	1160600	100950000	1	1	+			278	1221	True	1272	4175	6671	6671	117;118	406;410
gi|545875817	gi|545875817	1	1	1	>gi|545875817|ref|XP_003133739.2| PREDICTED: collagen alpha-3(IV) chain-like [Sus scrofa]	1	1	1	1	7.8	7.8	7.8	11.36	116	116	1	-2	6334400	1055700	6334400	1	1	+			382	1577	True	1645	5364	8563	8563	150	1
gi|545892437;gi|753704210;gi|21914408;gi|296034259;gi|47522838;gi|23396479;gi|18482462	gi|545892437;gi|753704210;gi|21914408;gi|296034259;gi|47522838;gi|23396479;gi|18482462	2;2;2;1;1;1;1	2;2;2;1;1;1;1	2;2;2;1;1;1;1	>gi|545892437|ref|XP_005653221.1| PREDICTED: CD9 antigen-like [Sus scrofa];>gi|753704210|gb|JAG69649.1| CD9 molecule [Sus scrofa domesticus];>gi|21914408|gb|AAM81376.1|AF525029_1 transmembrane protein CD9 [Sus scrofa];>gi|296034259|gb|ADG84492.1| CD9 antig	7	2	2	2	19.7	19.7	19.7	23.532	213	213;226;226;42;226;226;226	0	16.196	5210800	1042200	7812200	6	6				160	84;443	True;True	87;464	262;263;1681;1682;1683	502;503;504;2666;2667;2668	504;2666
gi|335292947	gi|335292947	8	8	8	>gi|335292947|ref|XP_001928857.3| PREDICTED: serpin A3-8 [Sus scrofa]	1	8	8	8	27.4	27.4	27.4	46.996	423	423	0	86.12	21857000	1040800	31591000	21	21				223	122;744;943;1251;1558;1784;2201;2338	True;True;True;True;True;True;True;True	127;779;985;1302;1623;1869;2299;2439	388;389;2581;2582;2583;2584;3349;3350;3351;4258;4259;5323;5324;6049;6050;6051;7444;7445;7996;7997;7998	676;677;4116;4117;4118;4119;5316;5317;5318;6819;6820;8510;8511;9563;9564;9565;11820;11821;12720;12721;12722;12723	677;4119;5316;6820;8510;9563;11821;12721
gi|119663027	gi|119663027	4	1	1	>gi|119663027|emb|CAJ45458.1| immunoglobulin heavy chain variable region, partial [Sus scrofa]	1	4	1	1	61.5	12.8	12.8	12.776	117	117	0	17.456	5175900	1035200	10739000	6	6				68	390;877;1483;1535	True;False;False;False	407;916;1542;1600	1521;1522;1523;1524;1525;3172;3173;3174;3175;3176;3177;5034;5035;5036;5200;5201;5202;5203;5204;5205;5206;5207;5208;5209;5210;5211;5212;5213;5214;5215;5216;5217;5218;5219;5220;5221;5222;5223;5224;5225;5226;5227;5228;5229;5230;5231;5232;5233;5234;5235;5236;5237;5238;5239;5240;5241;5242;5243;5244;5245;5246;5247;5248;5249;5250;5251;5252;5253;5254;5255;5256;5257;5258;5259;5260;5261;5262;5263;5264;5265…	2426;2427;2428;2429;2430;2431;2432;5050;5051;5052;5053;5054;5055;5056;5057;5058;5059;5060;8057;8058;8059;8060;8298;8299;8300;8301;8302;8303;8304;8305;8306;8307;8308;8309;8310;8311;8312;8313;8314;8315;8316;8317;8318;8319;8320;8321;8322;8323;8324;8325;8326;8327;8328;8329;8330;8331;8332;8333;8334;8335;8336;8337;8338;8339;8340;8341;8342;8343;8344;8345;8346;8347;8348;8349;8350;8351;8352;8353;8354;8355…	2428;5053;8060;8300
gi|441477589;gi|9954311;gi|9954309;gi|54888436	gi|441477589	13;1;1;1	1;1;1;1	0;0;0;0	>gi|441477589|dbj|BAM75550.1| IgG heavy chain precursor [Sus scrofa]	4	13	1	0	47.7	3.2	0	51.746	474	474;107;107;125	0	59.276	16128000	1008000	19203000	10	10				314	307;426;529;581;2004;2080;2095;2156;2233;2417;2478;2493;2511	True;False;False;False;False;False;False;False;False;False;False;False;False	318;319;445;554;609;2097;2174;2189;2252;2332;2522;2588;2603;2621	1235;1236;1237;1238;1239;1240;1241;1624;1625;1626;1627;1628;1629;1630;1631;1632;1633;1971;1972;2112;2113;2114;2115;6753;6754;6755;7085;7086;7087;7088;7089;7090;7091;7092;7120;7121;7122;7123;7124;7125;7301;7302;7303;7304;7305;7306;7307;7308;7535;8247;8248;8249;8250;8495;8585;8586;8587;8588;8589;8590;8591;8592;8643;8644;8645;8646;8647;8648	1996;1997;1998;1999;2000;2001;2002;2003;2004;2005;2588;2589;2590;2591;2592;2593;2594;2595;2596;2597;2598;2599;2600;3160;3161;3351;3352;3353;3354;3355;3356;3357;3358;3359;3360;3361;3362;10665;10666;10667;10668;11238;11239;11240;11241;11242;11243;11244;11245;11246;11247;11248;11249;11250;11251;11252;11253;11254;11255;11256;11257;11258;11305;11306;11307;11308;11309;11310;11311;11312;11313;11314;1131…	1997;2588;3161;3358;10665;11239;11315;11592;11946;13158;13566;13765;13864	59	104
gi|3980229;gi|231467;gi|545865183	gi|3980229;gi|231467;gi|545865183	7;7;7	7;7;7	7;7;7	>gi|3980229|emb|CAA39498.1| fetuin, partial [Sus scrofa];>gi|231467|sp|P29700.1|FETUA_PIG RecName: Full=Alpha-2-HS-glycoprotein; AltName: Full=Fetuin-A; Flags: Precursor;>gi|545865183|ref|XP_005652426.1| PREDICTED: alpha-2-HS-glycoprotein [Sus scrofa]	3	7	7	7	27.9	27.9	27.9	38.424	362	362;362;365	0	77.684	14037000	1002600	35862000	23	23				168	241;261;577;1031;1035;1740;1786	True;True;True;True;True;True;True	248;272;605;1079;1083;1824;1871	1063;1064;1065;1126;1127;1128;2099;2100;3660;3674;3675;3676;3677;5920;5921;5922;6055;6056;6057;6058	1723;1724;1725;1818;1819;1820;3327;3328;5836;5861;5862;5863;5864;5865;5866;9359;9360;9361;9362;9569;9570;9571;9572	1723;1820;3327;5836;5866;9360;9569
gi|545826497;gi|350596871;gi|335287176;gi|194036463;gi|311248642	gi|545826497;gi|350596871;gi|335287176;gi|194036463	8;8;5;5;1	8;8;5;5;1	8;8;5;5;1	>gi|545826497|ref|XP_005664026.1| PREDICTED: ras-related protein Rap-1b [Sus scrofa];>gi|350596871|ref|XP_003484329.1| PREDICTED: ras-related protein Rap-1b-like [Sus scrofa];>gi|335287176|ref|XP_003355289.1| PREDICTED: ras-related protein Rap-1A isoform 2	5	8	8	8	41.3	41.3	41.3	20.825	184	184;184;184;184;219	0	57.803	9934800	993480	19894000	17	17				282	238;424;590;1134;1548;1826;2382;2555	True;True;True;True;True;True;True;True	245;443;618;1185;1613;1913;2486;2668	1048;1049;1050;1622;2152;3944;3945;3946;3947;5300;6191;6192;6193;8119;8844;8845;8846	1703;1704;1705;2586;3424;6315;6316;6317;6318;8477;9764;9765;9766;12909;14184;14185;14186	1705;2586;3424;6316;8477;9764;12909;14184
gi|75062102;gi|55926209;gi|55668280;gi|335284210;gi|50916342	gi|75062102;gi|55926209;gi|55668280;gi|335284210;gi|50916342	5;5;5;5;4	5;5;5;5;4	4;4;4;4;3	>gi|75062102|sp|Q5S1U1.1|HSPB1_PIG RecName: Full=Heat shock protein beta-1; Short=HspB1; AltName: Full=Heat shock 27 kDa protein; Short=HSP 27;>gi|55926209|ref|NP_001007519.1| heat shock protein beta-1 [Sus scrofa];>gi|55668280|gb|AAV54182.1| Hsp27 [Sus sc	5	5	5	4	28	28	23.7	22.941	207	207;207;207;269;124	0	60.986	9832800	983280	26728000	15	15				216	1325;1736;1785;2017;2448	True;True;True;True;True	1379;1820;1870;2110;2554	4484;4485;5906;5907;5908;6052;6053;6054;6786;6787;6788;8341;8342	7179;7180;9332;9333;9334;9335;9566;9567;9568;10707;10708;10709;10710;13316;13317	7179;9335;9567;10707;13316
gi|47522826;gi|41019122;gi|402550457;gi|402550454;gi|402550451;gi|402550448;gi|20147563;gi|189409353;gi|164614625;gi|545829329;gi|545891774	gi|47522826;gi|41019122;gi|402550457;gi|402550454;gi|402550451;gi|402550448;gi|20147563;gi|189409353;gi|164614625;gi|545829329	10;10;10;10;10;10;10;10;9;9;1	10;10;10;10;10;10;10;10;9;9;1	10;10;10;10;10;10;10;10;9;9;1	>gi|47522826|ref|NP_999165.1| haptoglobin precursor [Sus scrofa];>gi|41019122|sp|Q8SPS7.1|HPT_PIG RecName: Full=Haptoglobin; AltName: Full=Zonulin; Contains: RecName: Full=Haptoglobin alpha chain; Contains: RecName: Full=Haptoglobin beta chain; Flags: Prec	11	10	10	10	38.6	38.6	38.6	38.481	347	347;347;347;347;347;347;347;347;188;301;185	0	128.01	20614000	981610	46008000	30	30				128	280;301;457;976;1242;2019;2087;2474;2608;2624	True;True;True;True;True;True;True;True;True;True	291;312;480;1020;1293;2112;2181;2584;2724;2741	1170;1171;1172;1225;1226;1760;3443;4226;4227;4228;4229;6791;6792;6793;6794;6795;6796;6797;7104;8479;8480;9014;9015;9073	1899;1900;1901;1986;1987;2818;5475;6773;6774;6775;6776;6777;6778;6779;6780;6781;6782;10714;10715;10716;10717;10718;10719;10720;11279;13529;13530;13531;14447;14448;14539	1900;1987;2818;5475;6779;10719;11279;13529;14447;14539
CON__P02533;gi|350590321;gi|545858037;gi|350590319;CON__Q6IFX2;gi|350590317;CON__P19012;CON__A2A4G1;CON__P08727;CON__P19001;CON__Q9Z2K1;CON__Q3ZAW8;CON__Q61782;gi|311267276;gi|350590343;CON__Q8N1A0;CON__P35900;gi|311267326;CON__Q9D312	CON__P02533;gi|350590321;gi|545858037	20;13;12;8;8;8;5;5;4;4;4;4;3;3;1;1;1;1;1	17;10;9;6;7;6;3;2;2;2;2;2;3;2;1;1;1;1;1	8;3;2;0;3;2;0;0;0;0;0;0;1;0;0;0;0;0;0	>P02533 SWISS-PROT:P02533 Tax_Id=9606 Gene_Symbol=KRT14 Keratin, type I cytoskeletal 14;>gi|350590321|ref|XP_003483033.1| PREDICTED: keratin, type I cytoskeletal 14-like isoformX1 [Sus scrofa];>gi|545858037|ref|XP_005653960.1| PREDICTED: keratin, type I cy	19	20	17	8	53.8	48.9	27.5	51.621	472	472;473;484;448;452;452;456;456;400;403;469;474;93;404;155;295;424;430;431	0	191.24	28833000	961110	71733000	40	40			+	2	25;102;153;180;243;285;623;925;927;1125;1163;1265;1281;1318;1395;1642;2158;2188;2386;2471	True;True;True;True;True;True;True;True;True;True;True;False;False;True;True;True;True;True;True;False	25;105;160;187;252;253;296;651;967;969;1176;1214;1317;1334;1372;1450;1719;2254;2285;2490;2581	99;327;328;329;678;679;739;740;741;1074;1075;1076;1190;1191;1192;1193;2232;2233;2234;2235;3303;3307;3308;3309;3924;3925;4015;4016;4017;4328;4329;4330;4331;4371;4372;4373;4374;4463;4765;5645;5646;7316;7387;8135;8136;8137;8459;8460;8461;8462;8463	234;599;600;601;1136;1137;1206;1207;1208;1734;1735;1736;1931;1932;1933;1934;1935;3583;3584;3585;3586;5263;5267;5268;5269;6290;6291;6421;6422;6423;6912;6913;6914;6915;6916;6917;6918;6919;6920;6921;6922;6923;7004;7005;7006;7007;7008;7009;7010;7011;7150;7151;7657;8970;8971;11619;11727;12930;12931;12932;13495;13496;13497;13498;13499;13500;13501;13502;13503	234;600;1136;1207;1735;1933;3584;5263;5269;6290;6423;6915;7006;7151;7657;8971;11619;11727;12931;13498	0;1;2	272;351;391
gi|119663065;gi|3171213;gi|54888530;gi|54888464;gi|54888476;gi|54888536;gi|54888556;gi|54888518;gi|54888420;gi|54888528;gi|1022943;gi|1022939;gi|54888520;gi|119662983	gi|119663065;gi|3171213;gi|54888530;gi|54888464;gi|54888476;gi|54888536;gi|54888556;gi|54888518;gi|54888420;gi|54888528;gi|1022943;gi|1022939;gi|54888520;gi|119662983	4;3;3;3;3;3;3;3;3;3;3;3;2;2	1;1;1;1;1;1;1;1;1;1;1;1;1;1	0;0;0;0;0;0;0;0;0;0;0;0;0;0	>gi|119663065|emb|CAJ45477.1| immunoglobulin heavy chain variable region, partial [Sus scrofa];>gi|3171213|gb|AAC18384.1| immunoglobulin heavy chain variable region, partial [Sus scrofa];>gi|54888530|emb|CAH68500.1| immunoglobulin heavy chain variable regi	14	4	1	0	56.1	14.4	0	14.341	132	132;119;121;123;125;126;127;127;127;130;145;145;126;126	0	19.185	5707400	951230	7047000	5	5				71	389;879;1473;1535	False;False;True;False	405;406;918;1532;1600	1507;1508;1509;1510;1511;1512;1513;1514;1515;1516;1517;1518;1519;1520;3182;3183;3184;5004;5005;5006;5007;5200;5201;5202;5203;5204;5205;5206;5207;5208;5209;5210;5211;5212;5213;5214;5215;5216;5217;5218;5219;5220;5221;5222;5223;5224;5225;5226;5227;5228;5229;5230;5231;5232;5233;5234;5235;5236;5237;5238;5239;5240;5241;5242;5243;5244;5245;5246;5247;5248;5249;5250;5251;5252;5253;5254;5255;5256;5257;5258…	2398;2399;2400;2401;2402;2403;2404;2405;2406;2407;2408;2409;2410;2411;2412;2413;2414;2415;2416;2417;2418;2419;2420;2421;2422;2423;2424;2425;5067;5068;5069;8023;8024;8025;8026;8027;8298;8299;8300;8301;8302;8303;8304;8305;8306;8307;8308;8309;8310;8311;8312;8313;8314;8315;8316;8317;8318;8319;8320;8321;8322;8323;8324;8325;8326;8327;8328;8329;8330;8331;8332;8333;8334;8335;8336;8337;8338;8339;8340;8341…	2419;5067;8025;8300	32	85
gi|119662971;gi|571399;gi|2136537	gi|119662971;gi|571399;gi|2136537	4;2;2	1;1;1	0;0;0	>gi|119662971|emb|CAJ45427.1| immunoglobulin heavy chain variable region, partial [Sus scrofa];>gi|571399|gb|AAA67022.1| Ig heavy chain variable VDJ region, partial [Sus scrofa];>gi|2136537|pir||I47197 Ig heavy chain variable VDJ region - pig (fragment)	3	4	1	0	45.3	6.2	0	13.917	128	128;141;141	0.0027855	6.4523	6301900	900270	17130000	2	2				64	389;1481;1535;2254	False;False;False;True	405;406;1540;1600;2353	1507;1508;1509;1510;1511;1512;1513;1514;1515;1516;1517;1518;1519;1520;5021;5022;5023;5024;5025;5026;5027;5028;5029;5030;5031;5200;5201;5202;5203;5204;5205;5206;5207;5208;5209;5210;5211;5212;5213;5214;5215;5216;5217;5218;5219;5220;5221;5222;5223;5224;5225;5226;5227;5228;5229;5230;5231;5232;5233;5234;5235;5236;5237;5238;5239;5240;5241;5242;5243;5244;5245;5246;5247;5248;5249;5250;5251;5252;5253;5254…	2398;2399;2400;2401;2402;2403;2404;2405;2406;2407;2408;2409;2410;2411;2412;2413;2414;2415;2416;2417;2418;2419;2420;2421;2422;2423;2424;2425;8041;8042;8043;8044;8045;8046;8047;8048;8049;8050;8051;8052;8053;8054;8298;8299;8300;8301;8302;8303;8304;8305;8306;8307;8308;8309;8310;8311;8312;8313;8314;8315;8316;8317;8318;8319;8320;8321;8322;8323;8324;8325;8326;8327;8328;8329;8330;8331;8332;8333;8334;8335…	2419;8054;8300;12067	32	83
gi|411147284;gi|291202698;gi|166236033	gi|411147284;gi|291202698;gi|166236033	11;11;9	4;4;3	3;3;2	>gi|411147284|dbj|BAM66304.1| IgG heavy chian constant region, partial [Sus scrofa];>gi|291202698|dbj|BAI82569.1| IgG heavy chain constant region, partial [Sus scrofa];>gi|166236033|gb|ABY85808.1| immunoglobulin gamma chain 5b, partial [Sus scrofa]	3	11	4	3	45.5	18	14.9	35.838	323	323;323;317	0	33.102	15026000	883900	14257000	8	8				179	248;266;343;1923;1962;2013;2095;2202;2232;2414;2492	False;True;False;True;True;False;False;False;True;False;False	258;277;356;2014;2054;2106;2189;2300;2331;2519;2602	1091;1092;1093;1094;1095;1096;1097;1098;1140;1141;1142;1389;6536;6537;6620;6776;6777;7120;7121;7122;7123;7124;7125;7446;7534;8240;8241;8579;8580;8581;8582;8583;8584	1770;1771;1772;1773;1774;1775;1776;1777;1841;1842;1843;1844;2209;2210;10316;10317;10318;10446;10693;10694;10695;10696;11305;11306;11307;11308;11309;11310;11311;11312;11313;11314;11315;11316;11317;11318;11319;11320;11822;11945;13144;13145;13146;13754;13755;13756;13757;13758;13759;13760;13761;13762	1773;1841;2210;10318;10446;10695;11315;11822;11945;13144;13757
gi|545843036;gi|9968807	gi|545843036	7;3	7;3	5;3	>gi|545843036|ref|XP_005666479.1| PREDICTED: serpin A3-8 [Sus scrofa]	2	7	7	5	20.2	20.2	15.3	47.159	426	426;203	0	65.059	18913000	859700	38188000	27	27				363	653;862;918;1787;1845;2208;2340	True;True;True;True;True;True;True	682;901;960;1872;1932;2306;2441	2311;2312;2313;3143;3144;3145;3146;3285;3286;3287;3288;6059;6060;6061;6062;6260;7459;7460;7461;8000;8001	3692;3693;3694;5011;5012;5013;5014;5015;5016;5241;5242;5243;5244;5245;5246;5247;5248;9573;9574;9575;9576;9860;11841;11842;11843;12725;12726	3692;5012;5245;9574;9860;11841;12726
gi|545851321	gi|545851321	14	14	14	>gi|545851321|ref|XP_005653806.1| PREDICTED: proteoglycan 4 [Sus scrofa]	1	14	14	14	18.3	18.3	18.3	113.04	1038	1038	0	109.53	53360000	846980	53742000	26	26				369	247;406;458;819;847;888;1170;1180;1629;1694;1841;1859;1947;2275	True;True;True;True;True;True;True;True;True;True;True;True;True;True	257;423;481;856;886;927;1221;1231;1704;1774;1928;1947;2038;2374;2375	1090;1564;1761;2944;3119;3205;3206;4034;4035;4067;5605;5606;5607;5784;5785;6246;6317;6586;7792;7793	1769;2486;2819;4739;4740;4982;4983;5099;5100;5101;6446;6447;6448;6449;6512;8921;8922;8923;8924;9164;9165;9843;9963;10399;12381;12382	1769;2486;2819;4740;4983;5100;6449;6512;8923;9165;9843;9963;10399;12382
gi|348605124	gi|348605124	11	11	11	>gi|348605124|ref|NP_001231712.1| pentraxin 3, long precursor [Sus scrofa]	1	11	11	11	33.2	33.2	33.2	41.92	382	382	0	94.849	15267000	803550	15661000	18	18				257	98;209;609;903;1075;1306;1330;2134;2169;2170;2516	True;True;True;True;True;True;True;True;True;True;True	101;216;637;945;1124;1359;1384;2230;2265;2266;2627	318;319;832;2207;3262;3791;4434;4496;7227;7228;7229;7339;7340;8661;8662	586;587;588;1356;3557;5207;6080;7117;7192;11470;11471;11472;11473;11474;11475;11661;11662;13884;13885	587;1356;3557;5207;6080;7117;7192;11471;11661;11662;13884
gi|41323529;gi|350582141;gi|41323649	gi|41323529;gi|350582141;gi|41323649	3;3;2	1;1;0	1;1;0	>gi|41323529|gb|AAR99922.1| immunoglobulin kappa variable region, partial [Sus scrofa];>gi|350582141|ref|XP_003481206.1| PREDICTED: uncharacterized protein LOC100736718 [Sus scrofa];>gi|41323649|gb|AAR99982.1| immunoglobulin kappa variable region, partial	3	3	1	1	47.3	26	26	14.308	131	131;279;131	0	12.237	3118000	779490	3118000	2	2				264	733;2038;2300	False;True;False	768;2131;2401	2548;2549;2550;2551;2552;2553;6855;6856;7885;7886;7887;7888;7889;7890	4065;4066;4067;4068;4069;4070;4071;4072;4073;4074;4075;4076;4077;4078;4079;4080;10803;10804;12570;12571;12572;12573;12574;12575;12576;12577;12578;12579;12580;12581	4069;10803;12577
gi|41323659;gi|41323669;gi|41323679	gi|41323659;gi|41323669;gi|41323679	4;3;2	2;1;1	2;1;1	>gi|41323659|gb|AAR99987.1| immunoglobulin kappa variable region, partial [Sus scrofa];>gi|41323669|gb|AAR99992.1| immunoglobulin kappa variable region, partial [Sus scrofa];>gi|41323679|gb|AAR99997.1| immunoglobulin kappa variable region, partial [Sus scr	3	4	2	2	47.7	26.5	26.5	14.176	132	132;132;131	0	12.778	4341600	723600	6902200	4	4				304	733;1401;2041;2300	False;True;True;False	768;1456;2134;2401	2548;2549;2550;2551;2552;2553;4776;4777;6863;6864;7885;7886;7887;7888;7889;7890	4065;4066;4067;4068;4069;4070;4071;4072;4073;4074;4075;4076;4077;4078;4079;4080;7680;7681;10819;10820;12570;12571;12572;12573;12574;12575;12576;12577;12578;12579;12580;12581	4069;7680;10820;12577
gi|441477577	gi|441477577	15	3	0	>gi|441477577|dbj|BAM75544.1| IgG heavy chain precursor [Sus scrofa]	1	15	3	0	55.4	10.6	0	51.388	471	471	0	22.165	13684000	720220	22769000	18	18				312	305;426;529;581;1487;2004;2080;2095;2156;2233;2417;2478;2481;2493;2511	True;False;False;False;True;False;False;False;False;False;False;False;True;False;False	316;445;554;609;1546;2097;2174;2189;2252;2332;2522;2588;2591;2603;2621	1230;1624;1625;1626;1627;1628;1629;1630;1631;1632;1633;1971;1972;2112;2113;2114;2115;5043;6753;6754;6755;7085;7086;7087;7088;7089;7090;7091;7092;7120;7121;7122;7123;7124;7125;7301;7302;7303;7304;7305;7306;7307;7308;7535;8247;8248;8249;8250;8495;8517;8518;8519;8520;8521;8522;8523;8585;8586;8587;8588;8589;8590;8591;8592;8643;8644;8645;8646;8647;8648	1991;2588;2589;2590;2591;2592;2593;2594;2595;2596;2597;2598;2599;2600;3160;3161;3351;3352;3353;3354;3355;3356;3357;3358;3359;3360;3361;3362;8067;10665;10666;10667;10668;11238;11239;11240;11241;11242;11243;11244;11245;11246;11247;11248;11249;11250;11251;11252;11253;11254;11255;11256;11257;11258;11305;11306;11307;11308;11309;11310;11311;11312;11313;11314;11315;11316;11317;11318;11319;11320;11592;11…	1991;2588;3161;3358;8067;10665;11239;11315;11592;11946;13158;13566;13625;13765;13864
gi|350591076	gi|350591076	1	1	1	>gi|350591076|ref|XP_003483197.1| PREDICTED: sodium channel protein type 11 subunit alpha [Sus scrofa]	1	1	1	1	1	1	1	132.74	1156	1156	1	-2	33128000	676070	41949000	3	3	+			273	1430	True	1488	4890;4891;4892	7848;7849;7850	7848	115	354
gi|545820748;gi|350583022;gi|358009191;gi|112980823;gi|350582722;gi|753702860;gi|545880805;gi|350582724;gi|138753471;gi|77176680	gi|545820748;gi|350583022;gi|358009191;gi|112980823	8;8;7;6;3;3;3;3;2;1	8;8;7;6;3;3;3;3;2;1	6;6;6;5;1;1;1;1;1;1	>gi|545820748|ref|XP_005663006.1| PREDICTED: 14-3-3 protein zeta/delta isoform X2 [Sus scrofa];>gi|350583022|ref|XP_001927263.3| PREDICTED: 14-3-3 protein zeta/delta isoform X1 [Sus scrofa];>gi|358009191|gb|AET99217.1| tyrosine 3-monooxygenase tryptophan 5	10	8	8	6	41.2	41.2	34.3	27.745	245	245;245;245;176;245;246;246;246;161;59	0	108.83	9413800	672420	19924000	26	26				266	339;419;572;853;1269;2070;2089;2586	True;True;True;True;True;True;True;True	352;437;438;600;892;1322;2164;2183;2701	1378;1379;1596;1597;1598;1599;1600;2089;2090;3132;4343;4344;4345;7064;7065;7066;7067;7106;7107;8932;8933;8934	2195;2196;2528;2529;2530;2531;2532;2533;3316;3317;5000;6938;6939;6940;6941;6942;6943;11213;11214;11215;11216;11281;11282;14337;14338;14339	2196;2528;3317;5000;6940;11213;11282;14338	110	218
gi|169244663;gi|129560399;gi|54144004;gi|398314162;gi|45685675;gi|73811113;gi|73811111;gi|73811109;gi|52789945;gi|46520143;gi|346991235;gi|170066030;gi|170066004;gi|170065991;gi|148575297;gi|33590530;gi|34979680;gi|167594042;gi|47523796;gi|38049041;gi|346540270;gi|33694199;CON__Q3Y5Z3	gi|169244663;gi|129560399;gi|54144004;gi|398314162;gi|45685675;gi|73811113;gi|73811111;gi|73811109;gi|52789945;gi|46520143;gi|346991235;gi|170066030;gi|170066004;gi|170065991;gi|148575297;gi|33590530;gi|34979680;gi|167594042;gi|47523796;gi|38049041;gi|346540270;gi|33694199	5;5;5;5;5;5;5;5;5;5;5;5;5;5;5;4;4;4;4;4;4;3;1	5;5;5;5;5;5;5;5;5;5;5;5;5;5;5;4;4;4;4;4;4;3;1	5;5;5;5;5;5;5;5;5;5;5;5;5;5;5;4;4;4;4;4;4;3;1	>gi|169244663|gb|ACA50588.1| adiponectin, partial [Sus scrofa];>gi|129560399|gb|ABO30578.1| adiponectin, partial [Sus scrofa];>gi|54144004|emb|CAH61062.1| adiponectin precursor, partial [Sus scrofa];>gi|398314162|gb|AFO73183.1| adiponectin, partial [Sus sc	23	5	5	5	28.6	28.6	28.6	22.993	213	213;216;225;240;242;243;243;243;243;243;243;243;243;243;243;144;153;242;243;243;243;145;240	0	59.905	8739000	672230	23755000	6	6				86	207;1085;1714;1883;2477	True;True;True;True;True	214;1134;1796;1971;2587	830;3810;5842;6385;8494	1354;6105;9244;10054;13564;13565	1354;6105;9244;10054;13565
CON__P02768-1	CON__P02768-1	9	5	5	>P02768-1 SWISS-PROT:P02768-1 Tax_Id=9606 Gene_Symbol=ALB Isoform 1 of Serum albumin precursor	1	9	5	5	18.6	12.5	12.5	69.366	609	609	0	39.274	24729000	668360	59146000	13	13			+	4	126;208;232;1628;1978;2105;2330;2366;2599	True;True;False;False;True;False;True;True;False	131;215;239;1703;2071;2199;2431;2469;2714	398;831;1035;1036;1037;1038;5601;5602;5603;5604;6678;6679;6680;6681;7148;7149;7150;7151;7978;8095;8973;8974;8975;8976	687;1355;1671;1672;1673;1674;1675;1676;1677;1678;8915;8916;8917;8918;8919;8920;10547;10548;10549;10550;10551;10552;10553;10554;10555;11358;11359;11360;11361;11362;11363;11364;11365;11366;12695;12883;14388;14389;14390;14391;14392;14393	687;1355;1673;8916;10550;11363;12695;12883;14389
gi|311248129	gi|311248129	4	4	4	>gi|311248129|ref|XP_003122987.1| PREDICTED: serum amyloid A-4 protein [Sus scrofa]	1	4	4	4	43.8	43.8	43.8	14.591	128	128	0	36.744	5325100	665640	13338000	12	12				185	471;904;1108;1946	True;True;True;True	494;946;1157;2037	1792;1793;1794;3263;3848;3849;3850;6583;6584;6585	2878;2879;2880;2881;5208;6150;6151;6152;6153;10396;10397;10398	2879;5208;6153;10396
gi|417515656;gi|545804280	gi|417515656;gi|545804280	9;6	9;6	9;6	>gi|417515656|gb|JAA53644.1| erythrocyte band 7 integral membrane protein isoform a [Sus scrofa];>gi|545804280|ref|XP_005660463.1| PREDICTED: erythrocyte band 7 integral membrane protein [Sus scrofa]	2	9	9	9	43	43	43	31.186	284	284;298	0	73.788	9883900	658920	16675000	25	25				307	130;495;912;1386;1667;1706;2149;2367;2597	True;True;True;True;True;True;True;True;True	135;520;954;1441;1744;1788;2245;2470;2712	405;406;407;1873;1874;3274;3275;4737;4738;5714;5819;5820;5821;5822;5823;5824;7276;8096;8097;8963;8964;8965	694;695;696;3014;3015;5225;5226;7616;7617;9074;9209;9210;9211;9212;9213;9214;9215;9216;11554;12884;12885;14375;14376;14377;14378	696;3014;5225;7616;9074;9209;11554;12884;14377
gi|114199061;gi|54888544	gi|114199061;gi|54888544	3;3	1;1	1;1	>gi|114199061|gb|ABI54124.1| immunoglobulin heavy chain variable region, partial [Sus scrofa];>gi|54888544|emb|CAH68507.1| immunoglobulin heavy chain variable region, partial [Sus scrofa]	2	3	1	1	50	19	19	10.789	100	100;127	0	7.1791	2597600	649400	4417500	3	3				46	306;1492;1535	False;True;False	317;1551;1600	1231;1232;1233;1234;5051;5052;5053;5200;5201;5202;5203;5204;5205;5206;5207;5208;5209;5210;5211;5212;5213;5214;5215;5216;5217;5218;5219;5220;5221;5222;5223;5224;5225;5226;5227;5228;5229;5230;5231;5232;5233;5234;5235;5236;5237;5238;5239;5240;5241;5242;5243;5244;5245;5246;5247;5248;5249;5250;5251;5252;5253;5254;5255;5256;5257;5258;5259;5260;5261;5262;5263;5264;5265;5266;5267;5268;5269;5270;5271;5272…	1992;1993;1994;1995;8076;8077;8078;8298;8299;8300;8301;8302;8303;8304;8305;8306;8307;8308;8309;8310;8311;8312;8313;8314;8315;8316;8317;8318;8319;8320;8321;8322;8323;8324;8325;8326;8327;8328;8329;8330;8331;8332;8333;8334;8335;8336;8337;8338;8339;8340;8341;8342;8343;8344;8345;8346;8347;8348;8349;8350;8351;8352;8353;8354;8355;8356;8357;8358;8359;8360;8361;8362;8363;8364;8365;8366;8367;8368;8369;8370…	1994;8077;8300
gi|161511626;gi|9954301;gi|161511651;gi|161511671;gi|161511665;gi|161511630;gi|9954337;gi|161511673;gi|1022921;gi|9954361;gi|9954357;gi|9954329;gi|9954365;gi|9954351;gi|9954347;gi|9954367;gi|9954299;gi|161511637;gi|9954363;gi|9954359;gi|9954331;gi|9954339;gi|9954325;gi|161511675;gi|161511647;gi|9954319;gi|161511649;gi|119663047;gi|119662885	gi|161511626	6;2;2;2;2;2;2;2;2;1;1;1;1;1;1;1;1;1;1;1;1;1;1;1;1;1;1;1;1	1;1;1;1;1;1;1;1;1;0;0;0;0;0;0;0;0;0;0;0;0;0;0;1;0;1;1;0;0	0;0;0;0;0;0;0;0;0;0;0;0;0;0;0;0;0;0;0;0;0;0;0;0;0;0;0;0;0	>gi|161511626|gb|ABX71830.1| mutated immunoglobulin heavy chain, partial [Sus scrofa]	29	6	1	0	35.1	9	0	26.293	245	245;99;101;102;107;108;109;110;146;93;94;94;95;95;100;103;103;104;105;105;105;107;108;109;109;110;111;119;122	0	14.159	5191500	648940	12183000	5	5				104	343;389;868;1880;2286;2618	False;False;True;False;False;False	356;405;406;907;1968;2387;2734	1389;1507;1508;1509;1510;1511;1512;1513;1514;1515;1516;1517;1518;1519;1520;3158;3159;3160;3161;6378;7825;9043;9044;9045;9046;9047	2209;2210;2398;2399;2400;2401;2402;2403;2404;2405;2406;2407;2408;2409;2410;2411;2412;2413;2414;2415;2416;2417;2418;2419;2420;2421;2422;2423;2424;2425;5032;5033;5034;5035;5036;10040;12443;14495;14496;14497;14498;14499;14500;14501	2210;2419;5035;10040;12443;14495	32	63
gi|545841117;gi|545841115;gi|213021241;gi|210062872;gi|545841123;gi|56199420	gi|545841117;gi|545841115;gi|213021241;gi|210062872;gi|545841123	4;3;3;3;2;1	4;3;3;3;2;1	4;3;3;3;2;1	>gi|545841117|ref|XP_005656350.1| PREDICTED: proteasome subunit alpha type-6 isoform X2 [Sus scrofa];>gi|545841115|ref|XP_005656349.1| PREDICTED: proteasome subunit alpha type-6 isoform X1 [Sus scrofa];>gi|213021241|ref|NP_001132944.1| proteasome subunit a	6	4	4	4	25.6	25.6	25.6	25.246	227	227;230;246;246;167;51	0	30.156	6458900	645890	7798600	8	8				360	1126;1169;1393;2578	True;True;True;True	1177;1220;1448;2693	3926;3927;4033;4761;4762;4763;8907	6292;6293;6445;7652;7653;7654;7655;14292	6292;6445;7652;14292
gi|3171219	gi|3171219	3	1	0	>gi|3171219|gb|AAC18387.1| immunoglobulin heavy chain variable region, partial [Sus scrofa]	1	3	1	0	46.2	16	0	12.728	119	119	0	10.606	3225600	645120	4890200	4	4				208	753;1476;1535	False;True;False	788;1535;1600	2682;2683;2684;5011;5012;5013;5014;5200;5201;5202;5203;5204;5205;5206;5207;5208;5209;5210;5211;5212;5213;5214;5215;5216;5217;5218;5219;5220;5221;5222;5223;5224;5225;5226;5227;5228;5229;5230;5231;5232;5233;5234;5235;5236;5237;5238;5239;5240;5241;5242;5243;5244;5245;5246;5247;5248;5249;5250;5251;5252;5253;5254;5255;5256;5257;5258;5259;5260;5261;5262;5263;5264;5265;5266;5267;5268;5269;5270;5271;5272…	4299;4300;4301;8031;8032;8033;8034;8298;8299;8300;8301;8302;8303;8304;8305;8306;8307;8308;8309;8310;8311;8312;8313;8314;8315;8316;8317;8318;8319;8320;8321;8322;8323;8324;8325;8326;8327;8328;8329;8330;8331;8332;8333;8334;8335;8336;8337;8338;8339;8340;8341;8342;8343;8344;8345;8346;8347;8348;8349;8350;8351;8352;8353;8354;8355;8356;8357;8358;8359;8360;8361;8362;8363;8364;8365;8366;8367;8368;8369;8370…	4301;8031;8300
gi|47522678;gi|3024050;gi|1915954;gi|21636592;CON__Q9TRI1	gi|47522678;gi|3024050;gi|1915954	16;16;16;3;3	16;16;16;3;3	16;16;16;3;3	>gi|47522678|ref|NP_999068.1| inter-alpha-trypsin inhibitor heavy chain H2 precursor [Sus scrofa];>gi|3024050|sp|O02668.1|ITIH2_PIG RecName: Full=Inter-alpha-trypsin inhibitor heavy chain H2; Short=ITI heavy chain H2; Short=ITI-HC2; Short=Inter-alpha-inhib	5	16	16	16	24.7	24.7	24.7	104.62	935	935;935;935;77;946	0	149.41	31967000	639350	35734000	24	24				130	40;59;78;128;701;769;1005;1101;1147;1189;1549;1562;1625;1657;1720;2490	True;True;True;True;True;True;True;True;True;True;True;True;True;True;True;True	42;62;81;133;732;805;1050;1150;1198;1240;1614;1628;1700;1734;1802;2600	147;148;149;197;250;251;401;2447;2448;2735;3522;3523;3524;3835;3975;4093;4094;4095;4096;5301;5331;5593;5693;5861;8546;8547	301;302;303;383;486;487;690;3911;3912;4377;5609;5610;5611;6132;6364;6560;6561;6562;6563;8478;8518;8905;9038;9276;13670;13671	302;383;486;690;3912;4377;5610;6132;6364;6560;8478;8518;8905;9038;9276;13671
gi|90823108;gi|68532159;gi|68532157;gi|113205704	gi|90823108;gi|68532159;gi|68532157;gi|113205704	5;5;5;5	5;5;5;5	5;5;5;5	>gi|90823108|gb|ABE01081.1| proteasome beta 10 subunit [Sus scrofa];>gi|68532159|gb|AAY98814.1| proteasome subunit 10 [Sus scrofa];>gi|68532157|gb|AAY98813.1| proteasome subunit 10 [Sus scrofa];>gi|113205704|ref|NP_001038030.1| proteasome subunit beta type	4	5	5	5	28.9	28.9	28.9	28.951	273	273;273;273;273	0	43.272	5104400	638050	5470600	7	7				45	196;652;1099;1444;2182	True;True;True;True;True	203;681;1148;1502;2278	800;2310;3831;4917;4918;7374	1312;1313;3691;6128;7878;7879;11711	1313;3691;6128;7878;11711
gi|347349872	gi|347349872	3	3	3	>gi|347349872|ref|NP_001231343.2| syntenin-1 CG9291-PB [Sus scrofa]	1	3	3	3	13.5	13.5	13.5	32.301	297	297	0	24.466	5738800	637640	9956000	9	9				255	418;1556;1998	True;True;True	436;1621;2091	1592;1593;1594;1595;5320;6734;6735	2523;2524;2525;2526;2527;8507;10640;10641;10642	2527;8507;10642
gi|41323663;gi|41323661;gi|41323629;gi|41323597;gi|41323587;gi|41323559;gi|41323555;gi|41323553;gi|41323541;gi|41323537;gi|41323527;gi|41323517;gi|41323515;gi|41323569;gi|41323567;gi|41323671;gi|41323635;gi|41323581;gi|41323655;gi|41323651;gi|41323639;gi|41323579;gi|41323565;gi|41323535;gi|41323665;gi|41323633;gi|41323677;gi|41323675;gi|41323673;gi|41323637	gi|41323663;gi|41323661;gi|41323629;gi|41323597;gi|41323587;gi|41323559;gi|41323555;gi|41323553;gi|41323541;gi|41323537;gi|41323527;gi|41323517;gi|41323515;gi|41323569;gi|41323567;gi|41323671;gi|41323635;gi|41323581;gi|41323655;gi|41323651;gi|41323639;gi|41323579;gi|41323565;gi|41323535;gi|41323665	3;3;3;3;3;3;3;3;3;3;3;3;3;2;2;2;2;2;2;2;2;2;2;2;2;1;1;1;1;1	1;1;1;1;1;1;1;1;1;1;1;1;1;0;0;0;1;1;0;0;0;0;0;0;0;0;0;0;0;0	0;0;0;0;0;0;0;0;0;0;0;0;0;0;0;0;0;0;0;0;0;0;0;0;0;0;0;0;0;0	>gi|41323663|gb|AAR99989.1| immunoglobulin kappa variable region, partial [Sus scrofa];>gi|41323661|gb|AAR99988.1| immunoglobulin kappa variable region, partial [Sus scrofa];>gi|41323629|gb|AAR99972.1| immunoglobulin kappa variable region, partial [Sus scr	30	3	1	0	37.9	19.7	0	14.335	132	132;132;132;132;132;132;132;132;132;132;132;132;132;120;130;131;132;132;132;132;132;132;132;132;133;131;132;132;132;132	0	16	3171700	634340	8621500	2	2				296	750;2040;2302	False;False;True	785;2133;2403	2673;2674;2675;2676;2677;2678;2679;6858;6859;6860;6861;6862;7892;7893	4277;4278;4279;4280;4281;4282;4283;4284;4285;4286;4287;4288;4289;4290;4291;4292;4293;4294;4295;10806;10807;10808;10809;10810;10811;10812;10813;10814;10815;10816;10817;10818;12583;12584	4287;10814;12584
gi|194038353	gi|194038353	7	6	4	>gi|194038353|ref|XP_001928879.1| PREDICTED: serpin A3-6 [Sus scrofa]	1	7	6	4	18.2	16.1	12.3	47.221	423	423	0	50.313	12006000	631870	19744000	10	10				133	569;663;734;1307;1557;1787;1920	True;True;True;True;True;False;True	597;692;769;1360;1622;1872;2011	2085;2086;2335;2336;2337;2554;2555;4435;5321;5322;6059;6060;6061;6062;6530	3312;3313;3745;3746;3747;4081;4082;7118;8508;8509;9573;9574;9575;9576;10307	3312;3745;4082;7118;8508;9574;10307
gi|753704212;gi|381218022;gi|156622226;gi|118403822;gi|118138612;gi|115522021	gi|753704212;gi|381218022;gi|156622226;gi|118403822;gi|118138612;gi|115522021	2;2;2;2;2;2	2;2;2;2;2;2	2;2;2;2;2;2	>gi|753704212|gb|JAG69650.1| CD81 molecule [Sus scrofa domesticus];>gi|381218022|gb|AFG17070.1| CD81 [Sus scrofa];>gi|156622226|emb|CAL37099.1| CD81 protein [Sus scrofa];>gi|118403822|ref|NP_001072147.1| CD81 antigen [Sus scrofa];>gi|118138612|gb|ABK63185.	6	2	2	2	16.5	16.5	16.5	25.752	236	236;236;236;236;236;236	0	23.144	4258600	608370	6971300	4	4				48	1701;2122	True;True	1782;2218	5801;5802;7206;7207	9191;9192;11443;11444	9192;11443
gi|41323627;gi|41323683;gi|41323685;gi|41323623;gi|41323563;gi|41323551;gi|41323519;gi|41323509;gi|41323681;gi|41323653;gi|41323645;gi|41323621;gi|41323619;gi|41323617;gi|41323611;gi|41323607;gi|41323603;gi|41323599;gi|41323589;gi|41323583;gi|41323575;gi|41323573;gi|41323561;gi|41323557;gi|41323547;gi|41323545;gi|41323543;gi|41323533;gi|41323521;gi|41323631	gi|41323627;gi|41323683;gi|41323685;gi|41323623;gi|41323563;gi|41323551;gi|41323519;gi|41323509;gi|41323681;gi|41323653;gi|41323645;gi|41323621;gi|41323619;gi|41323617;gi|41323611;gi|41323607;gi|41323603;gi|41323599;gi|41323589;gi|41323583;gi|41323575;gi|41323573;gi|41323561;gi|41323557;gi|41323547;gi|41323545;gi|41323543;gi|41323533;gi|41323521	3;2;2;2;2;2;2;2;2;2;2;2;2;2;2;2;2;2;2;2;2;2;2;2;2;2;2;2;2;1	1;1;1;1;1;1;1;1;1;1;1;1;1;1;1;1;1;1;1;1;1;1;1;1;1;1;1;1;1;1	0;0;0;0;0;0;0;0;0;0;0;0;0;0;0;0;0;0;0;0;0;0;0;0;0;0;0;0;0;0	>gi|41323627|gb|AAR99971.1| immunoglobulin kappa variable region, partial [Sus scrofa];>gi|41323683|gb|AAR99999.1| immunoglobulin kappa variable region, partial [Sus scrofa];>gi|41323685|gb|AAS00001.1| immunoglobulin kappa variable region, partial [Sus scr	30	3	1	0	36.4	6.8	0	14.127	132	132;120;131;131;131;131;131;131;132;132;132;132;132;132;132;132;132;132;132;132;132;132;132;132;132;132;132;132;132;132	0	8.9316	3028400	605680	3989200	2	2				300	750;1409;2301	False;True;False	785;1464;2402	2673;2674;2675;2676;2677;2678;2679;4832;4833;7891	4277;4278;4279;4280;4281;4282;4283;4284;4285;4286;4287;4288;4289;4290;4291;4292;4293;4294;4295;7763;7764;12582	4287;7763;12582
gi|441477609;gi|441477603;gi|441477605;gi|433122;gi|2136512;gi|159138024	gi|441477609;gi|441477603;gi|441477605;gi|433122;gi|2136512	12;12;12;11;11;4	1;1;1;1;1;0	1;1;1;1;1;0	>gi|441477609|dbj|BAM75560.1| IgG heavy chain precursor [Sus scrofa];>gi|441477603|dbj|BAM75557.1| IgG heavy chain precursor [Sus scrofa];>gi|441477605|dbj|BAM75558.1| IgG heavy chain precursor [Sus scrofa];>gi|433122|gb|AAA52216.1| Ig gamma 1b chain const	6	12	1	1	44.4	6.5	6.5	50.942	462	462;471;474;328;328;120	0	10.942	12551000	597650	27503000	7	7				319	426;529;581;665;1535;2005;2080;2095;2233;2350;2417;2493	False;False;False;False;False;False;False;False;False;True;False;False	445;554;609;694;1600;2098;2174;2189;2332;2453;2522;2603	1624;1625;1626;1627;1628;1629;1630;1631;1632;1633;1971;1972;2112;2113;2114;2115;2340;5200;5201;5202;5203;5204;5205;5206;5207;5208;5209;5210;5211;5212;5213;5214;5215;5216;5217;5218;5219;5220;5221;5222;5223;5224;5225;5226;5227;5228;5229;5230;5231;5232;5233;5234;5235;5236;5237;5238;5239;5240;5241;5242;5243;5244;5245;5246;5247;5248;5249;5250;5251;5252;5253;5254;5255;5256;5257;5258;5259;5260;5261;5262…	2588;2589;2590;2591;2592;2593;2594;2595;2596;2597;2598;2599;2600;3160;3161;3351;3352;3353;3354;3355;3356;3357;3358;3359;3360;3361;3362;3750;8298;8299;8300;8301;8302;8303;8304;8305;8306;8307;8308;8309;8310;8311;8312;8313;8314;8315;8316;8317;8318;8319;8320;8321;8322;8323;8324;8325;8326;8327;8328;8329;8330;8331;8332;8333;8334;8335;8336;8337;8338;8339;8340;8341;8342;8343;8344;8345;8346;8347;8348;8349…	2588;3161;3358;3750;8300;10669;11239;11315;11946;12809;13158;13765
gi|41323647	gi|41323647	1	1	1	>gi|41323647|gb|AAR99981.1| immunoglobulin kappa variable region, partial [Sus scrofa]	1	1	1	1	12.6	12.6	12.6	13.572	127	127	0	10.914	2967100	593420	8065500	3	3				303	1408	True	1463	4830;4831	7760;7761;7762	7760
gi|5052050;gi|47523192	gi|5052050;gi|47523192	14;14	1;1	0;0	>gi|5052050|gb|AAD38418.1|AF062384_1 IgG heavy chain precursor [Sus scrofa];>gi|47523192|ref|NP_998993.1| IgG heavy chain precursor [Sus scrofa]	2	14	1	0	51.1	3.4	0	52.189	474	474;474	0	13.555	12323000	586820	27995000	9	9				328	389;426;529;581;1534;2004;2080;2095;2156;2233;2417;2478;2493;2511	False;False;False;False;True;False;False;False;False;False;False;False;False;False	405;406;445;554;609;1599;2097;2174;2189;2252;2332;2522;2588;2603;2621	1507;1508;1509;1510;1511;1512;1513;1514;1515;1516;1517;1518;1519;1520;1624;1625;1626;1627;1628;1629;1630;1631;1632;1633;1971;1972;2112;2113;2114;2115;5196;5197;5198;5199;6753;6754;6755;7085;7086;7087;7088;7089;7090;7091;7092;7120;7121;7122;7123;7124;7125;7301;7302;7303;7304;7305;7306;7307;7308;7535;8247;8248;8249;8250;8495;8585;8586;8587;8588;8589;8590;8591;8592;8643;8644;8645;8646;8647;8648	2398;2399;2400;2401;2402;2403;2404;2405;2406;2407;2408;2409;2410;2411;2412;2413;2414;2415;2416;2417;2418;2419;2420;2421;2422;2423;2424;2425;2588;2589;2590;2591;2592;2593;2594;2595;2596;2597;2598;2599;2600;3160;3161;3351;3352;3353;3354;3355;3356;3357;3358;3359;3360;3361;3362;8289;8290;8291;8292;8293;8294;8295;8296;8297;10665;10666;10667;10668;11238;11239;11240;11241;11242;11243;11244;11245;11246;1…	2419;2588;3161;3358;8291;10665;11239;11315;11592;11946;13158;13566;13765;13864	32	101
gi|222136592	gi|222136592	4	4	4	>gi|222136592|ref|NP_001138374.1| proteasome subunit beta type-3 [Sus scrofa]	1	4	4	4	30.7	30.7	30.7	23.008	205	205	0	32.35	5021200	557910	5469400	7	7				164	294;684;686;1553	True;True;True;True	305;715;717;1618	1213;2403;2408;5307;5308;5309;5310	1968;3832;3837;8484;8485;8486;8487	1968;3832;3837;8485
gi|545877574	gi|545877574	6	1	1	>gi|545877574|ref|XP_005674537.1| PREDICTED: LOW QUALITY PROTEIN: actin, beta-like 2 [Sus scrofa]	1	6	1	1	30.4	5.8	5.8	34.497	309	309	0.0029674	6.9388	8902700	556420	24200000	2	2				386	373;1022;1183;2076;2228;2263	False;False;False;False;False;True	386;1068;1069;1070;1234;2170;2327;2362	1451;1452;1453;1454;1455;1456;1457;3625;3626;3627;3628;3629;3630;3631;4072;4073;4074;4075;4076;4077;4078;4079;7076;7077;7078;7079;7080;7081;7520;7521;7522;7523;7524;7525;7622;7623	2309;2310;2311;2312;2313;2314;2315;2316;2317;2318;2319;2320;2321;2322;5780;5781;5782;5783;5784;5785;5786;5787;5788;5789;5790;5791;5792;6517;6518;6519;6520;6521;6522;6523;6524;6525;6526;6527;6528;6529;6530;6531;6532;6533;11227;11228;11229;11230;11231;11232;11233;11234;11930;11931;11932;11933;11934;11935;12084;12085	2314;5786;6526;11228;11930;12084	41;42	45;48
gi|54888540;gi|119662941	gi|54888540;gi|119662941	4;4	2;2	1;1	>gi|54888540|emb|CAH68505.1| immunoglobulin heavy chain variable region, partial [Sus scrofa];>gi|119662941|emb|CAJ45412.1| immunoglobulin heavy chain variable region, partial [Sus scrofa]	2	4	2	1	60.7	35.2	15.6	12.937	122	122;125	0	27.815	3223600	537260	2917200	5	5				60	306;873;1489;1535	False;True;True;False	317;912;1548;1600	1231;1232;1233;1234;3168;5045;5046;5047;5200;5201;5202;5203;5204;5205;5206;5207;5208;5209;5210;5211;5212;5213;5214;5215;5216;5217;5218;5219;5220;5221;5222;5223;5224;5225;5226;5227;5228;5229;5230;5231;5232;5233;5234;5235;5236;5237;5238;5239;5240;5241;5242;5243;5244;5245;5246;5247;5248;5249;5250;5251;5252;5253;5254;5255;5256;5257;5258;5259;5260;5261;5262;5263;5264;5265;5266;5267;5268;5269;5270;5271…	1992;1993;1994;1995;5044;8069;8070;8071;8072;8298;8299;8300;8301;8302;8303;8304;8305;8306;8307;8308;8309;8310;8311;8312;8313;8314;8315;8316;8317;8318;8319;8320;8321;8322;8323;8324;8325;8326;8327;8328;8329;8330;8331;8332;8333;8334;8335;8336;8337;8338;8339;8340;8341;8342;8343;8344;8345;8346;8347;8348;8349;8350;8351;8352;8353;8354;8355;8356;8357;8358;8359;8360;8361;8362;8363;8364;8365;8366;8367;8368…	1994;5044;8072;8300
gi|611961749;gi|347300176;gi|545809057;gi|1717797	gi|611961749;gi|347300176;gi|545809057;gi|1717797	3;3;3;2	3;3;3;2	3;3;3;2	>gi|611961749|gb|AHW83663.1| peroxiredoxin 2 [Sus scrofa];>gi|347300176|ref|NP_001231403.1| peroxiredoxin-2 [Sus scrofa];>gi|545809057|ref|XP_005652916.1| PREDICTED: peroxiredoxin-2 isoform X1 [Sus scrofa];>gi|1717797|sp|P52552.1|PRDX2_PIG RecName: Full=Pe	4	3	3	3	14.1	14.1	14.1	21.88	198	198;198;200;127	0	23.184	5319700	531970	10424000	11	11				252	881;1138;1770	True;True;True	920;1189;1855	3186;3187;3188;3958;3959;3960;6000;6001;6002	5071;5072;5073;6344;6345;6346;6347;6348;9494;9495;9496	5071;6346;9495
gi|95772096;gi|85062376;gi|82618525;gi|147832415;gi|122146492;gi|147832414	gi|95772096;gi|85062376;gi|82618525;gi|147832415;gi|122146492;gi|147832414	7;7;7;7;7;5	7;7;7;7;7;5	7;7;7;7;7;5	>gi|95772096|ref|NP_001035730.1| apolipoprotein M precursor [Sus scrofa];>gi|85062376|gb|ABC59064.1| apolipoprotein M [Sus scrofa];>gi|82618525|gb|ABB85067.1| apolipoprotein M [Sus scrofa];>gi|147832415|emb|CAN59667.1| apolipoprotein M [Sus scrofa];>gi|122	6	7	7	7	54.3	54.3	54.3	21.241	188	188;188;188;188;188;116	0	50.258	5842200	531110	15881000	10	10				76	54;278;499;510;1336;1498;1687	True;True;True;True;True;True;True	57;289;524;535;1390;1558;1766	182;1168;1884;1885;1915;4510;4511;5072;5758	352;353;1897;3031;3032;3078;7211;7212;8101;9126	353;1897;3032;3078;7211;8101;9126
gi|545811694;gi|327343034;gi|330340395;gi|327343032;gi|545811698;gi|327343038;gi|545811696;gi|327343036;gi|6606282	gi|545811694;gi|327343034;gi|330340395;gi|327343032;gi|545811698;gi|327343038;gi|545811696;gi|327343036	15;15;15;15;12;12;12;12;2	15;15;15;15;12;12;12;12;2	15;15;15;15;12;12;12;12;2	>gi|545811694|ref|XP_005661592.1| PREDICTED: versican core protein isoform X1 [Sus scrofa];>gi|327343034|dbj|BAK09349.1| versican [Sus scrofa];>gi|330340395|ref|NP_001193358.1| versican core protein precursor [Sus scrofa];>gi|327343032|dbj|BAK09348.1| vers	9	15	15	15	8.4	8.4	8.4	261.77	2402	2402;2402;3382;3382;656;656;1636;1636;103	0	125.37	36439000	520560	35945000	24	24				209	19;155;252;563;599;723;949;1019;1216;1387;1460;1574;2222;2456;2563	True;True;True;True;True;True;True;True;True;True;True;True;True;True;True	19;162;262;590;627;757;991;1065;1267;1442;1518;1519;1641;2321;2563;2676	59;60;681;1103;2066;2180;2521;3363;3612;4163;4164;4739;4959;4960;4961;5353;7500;8400;8401;8868	133;134;1139;1782;3286;3498;4026;4027;5349;5762;5763;6654;6655;7618;7938;7939;7940;7941;8544;8545;11897;13410;13411;14231	134;1139;1782;3286;3498;4026;5349;5763;6654;7618;7941;8544;11897;13411;14231	78	2220
gi|41323643	gi|41323643	3	1	1	>gi|41323643|gb|AAR99979.1| immunoglobulin kappa variable region, partial [Sus scrofa]	1	3	1	1	44.7	15.2	15.2	14.388	132	132	0	7.5851	2599300	519870	2599300	1	1				302	750;2302;2539	False;False;True	785;2403;2650	2673;2674;2675;2676;2677;2678;2679;7892;7893;8732	4277;4278;4279;4280;4281;4282;4283;4284;4285;4286;4287;4288;4289;4290;4291;4292;4293;4294;4295;12583;12584;14001	4287;12584;14001
gi|343183368	gi|343183368	8	1	1	>gi|343183368|ref|NP_001230248.1| immunoglobulin lambda-like polypeptide 5 precursor [Sus scrofa]	1	8	1	1	52.1	6.8	6.8	24.149	234	234	0.0026667	6.2085	4988600	498860	5671200	4	4				234	10;63;195;731;2043;2240;2243;2541	False;False;False;False;False;True;False;False	10;66;202;766;2136;2339;2342;2652	19;20;21;22;23;24;25;26;27;28;29;30;31;32;33;34;35;36;37;205;206;207;208;209;210;211;212;213;214;215;216;217;218;219;780;781;782;783;784;785;786;787;788;789;790;791;792;793;794;795;796;797;798;799;2537;2538;2539;2540;2541;2542;2543;2544;2545;2546;6867;6868;6869;6870;6871;6872;6873;6874;6875;6876;6877;6878;6879;6880;6881;6882;7559;7560;7561;7571;7572;7573;7574;8736;8737;8738;8739;8740;8741;8742;87…	26;27;28;29;30;31;32;33;34;35;36;37;38;39;40;41;42;43;44;45;46;47;48;49;50;51;52;53;54;55;56;57;58;59;60;61;62;63;64;65;66;67;68;69;70;71;72;73;74;75;76;77;78;79;80;81;82;83;84;85;86;87;88;89;90;91;92;93;94;395;396;397;398;399;400;401;402;403;404;405;406;407;408;409;410;411;412;413;414;415;416;417;418;419;420;421;422;423;424;425;426;427;428;429;430;431;432;433;434;435;436;437;438;439;440;441;442;…	51;408;1306;4059;10842;11977;12001;14066
gi|545876815;gi|194719515;gi|183228161;gi|223950629;gi|194719517	gi|545876815;gi|194719515;gi|183228161;gi|223950629;gi|194719517	4;4;4;4;4	4;4;4;4;4	4;4;4;4;4	>gi|545876815|ref|XP_005672465.1| PREDICTED: complement C1q tumor necrosis factor-related protein 3 isoform X1 [Sus scrofa];>gi|194719515|gb|ACF93797.1| C1q and tumor necrosis factor-related protein 3 isoform a [Sus scrofa];>gi|183228161|gb|ACC59784.1| put	5	4	4	4	18.3	18.3	18.3	26.736	246	246;246;246;319;319	0	30.659	3485000	497850	9473100	12	12				127	230;740;1579;1900	True;True;True;True	237;775;1647;1990	1026;1027;2567;2568;2569;5366;5367;6453;6454	1658;1659;4099;4100;4101;8565;8566;8567;8568;10190;10191;10192	1659;4099;8568;10190
CON__P13647;gi|545825280;gi|545825277;gi|311255405;gi|545825252;gi|545825255;gi|545825249;gi|350583965;gi|311255413	CON__P13647;gi|545825280;gi|545825277;gi|311255405;gi|545825252;gi|545825255;gi|545825249;gi|350583965	19;16;16;16;10;10;10;10;8	9;6;6;6;1;1;1;1;1	0;0;0;0;0;0;0;0;0	>P13647 SWISS-PROT:P13647 Tax_Id=9606 Gene_Symbol=KRT5 Keratin, type II cytoskeletal 5;>gi|545825280|ref|XP_005652613.1| PREDICTED: keratin, type II cytoskeletal 5 isoform X3 [Sus scrofa];>gi|545825277|ref|XP_005652612.1| PREDICTED: keratin, type II cytosk	9	19	9	0	29.3	15.8	0	62.378	590	590;569;584;602;568;571;577;601;535	0	89.068	14840000	478720	36875000	24	24			+	11	171;642;654;697;982;1273;1396;1650;1651;1652;1674;1792;1931;2109;2223;2278;2532;2557;2560	True;True;False;False;True;False;False;False;False;False;True;False;True;True;True;True;False;False;True	178;671;683;728;1026;1326;1451;1727;1728;1729;1751;1877;2022;2203;2322;2378;2379;2643;2670;2673	721;722;723;724;2291;2292;2293;2314;2315;2438;3449;3450;4356;4357;4358;4359;4766;4767;4768;5668;5669;5670;5671;5672;5673;5674;5675;5676;5677;5678;5679;5680;5681;5725;5726;6070;6071;6072;6073;6074;6075;6076;6561;7159;7501;7799;7800;8707;8708;8848;8849;8850;8858;8859;8860;8861	1184;1185;1186;1187;1188;3670;3671;3672;3695;3696;3697;3698;3699;3700;3701;3884;5481;5482;5483;6972;6973;6974;6975;6976;6977;6978;6979;6980;6981;6982;7658;7659;7660;7661;9004;9005;9006;9007;9008;9009;9010;9011;9012;9013;9014;9015;9016;9017;9018;9019;9020;9021;9022;9023;9024;9025;9086;9087;9588;9589;9590;9591;9592;9593;9594;10366;11376;11898;12389;12390;13954;13955;14188;14189;14190;14191;14192;14…	1184;3670;3696;3884;5483;6976;7660;9005;9018;9025;9086;9589;10366;11376;11898;12389;13955;14192;14214	15;16	274;297
gi|222136590	gi|222136590	3	3	3	>gi|222136590|ref|NP_001138373.1| proteasome subunit alpha type-5 [Sus scrofa]	1	3	3	3	17	17	17	26.411	241	241	0	26.818	4748700	474870	5658400	5	5				163	915;962;1333	True;True;True	957;1005;1387	3282;3405;3406;4500;4501	5238;5407;5408;7197;7198	5238;5407;7197
gi|59799941;gi|54888512;gi|54888532	gi|59799941;gi|54888512;gi|54888532	4;4;3	2;2;2	0;0;0	>gi|59799941|gb|AAX07329.1| immunoglobulin heavy chain, partial [Sus scrofa];>gi|54888512|emb|CAH68491.1| immunoglobulin heavy chain variable region, partial [Sus scrofa];>gi|54888532|emb|CAH68501.1| immunoglobulin heavy chain variable region, partial [Sus	3	4	2	0	61	34.7	0	12.976	118	118;124;124	0	21.497	2276700	455340	2743400	3	3				402	389;870;1486;1535	False;True;True;False	405;406;909;1545;1600	1507;1508;1509;1510;1511;1512;1513;1514;1515;1516;1517;1518;1519;1520;3163;3164;5042;5200;5201;5202;5203;5204;5205;5206;5207;5208;5209;5210;5211;5212;5213;5214;5215;5216;5217;5218;5219;5220;5221;5222;5223;5224;5225;5226;5227;5228;5229;5230;5231;5232;5233;5234;5235;5236;5237;5238;5239;5240;5241;5242;5243;5244;5245;5246;5247;5248;5249;5250;5251;5252;5253;5254;5255;5256;5257;5258;5259;5260;5261;5262…	2398;2399;2400;2401;2402;2403;2404;2405;2406;2407;2408;2409;2410;2411;2412;2413;2414;2415;2416;2417;2418;2419;2420;2421;2422;2423;2424;2425;5038;5039;8066;8298;8299;8300;8301;8302;8303;8304;8305;8306;8307;8308;8309;8310;8311;8312;8313;8314;8315;8316;8317;8318;8319;8320;8321;8322;8323;8324;8325;8326;8327;8328;8329;8330;8331;8332;8333;8334;8335;8336;8337;8338;8339;8340;8341;8342;8343;8344;8345;8346…	2419;5038;8066;8300	32	102
gi|237681312;gi|226442053;gi|195969549;gi|126302600	gi|237681312;gi|226442053;gi|195969549;gi|126302600	5;5;5;5	5;5;5;5	5;5;5;5	>gi|237681312|ref|NP_001153744.1| protein S100-A12 [Sus scrofa];>gi|226442053|gb|ACO57616.1| calcium-binding protein A12 [Sus scrofa];>gi|195969549|gb|ACG60599.1| calcium-binding protein S100A12 [Sus scrofa];>gi|126302600|sp|P80310.2|S10AC_PIG RecName: Ful	4	5	5	5	76.1	76.1	76.1	10.745	92	92;92;92;92	0	53.814	2685400	447560	7299600	6	6				84	515;559;1083;1303;1346	True;True;True;True;True	540;585;1132;1356;1400	1934;1935;2059;3807;4431;4543	3101;3102;3278;6101;7114;7270	3101;3278;6101;7114;7270
gi|39646090;gi|47523636;gi|21464594;CON__Q28085	gi|39646090;gi|47523636;gi|21464594	18;18;18;1	18;18;18;1	18;18;18;1	>gi|39646090|emb|CAE83881.1| unnamed protein product, partial [Sus scrofa];>gi|47523636|ref|NP_999446.1| complement factor H precursor [Sus scrofa];>gi|21464594|emb|CAC81999.1| complement regulator factor H [Sus scrofa]	4	18	18	18	18.5	18.5	18.5	136.51	1216	1216;1234;1234;1236	0	148.37	24790000	442690	26286000	28	28				157	253;258;276;445;518;541;1074;1222;1767;1874;1934;1935;2099;2107;2171;2408;2526;2538	True;True;True;True;True;True;True;True;True;True;True;True;True;True;True;True;True;True	263;268;287;466;543;566;1123;1273;1851;1962;2025;2026;2193;2201;2267;2513;2637;2649	1104;1115;1116;1166;1685;1943;2015;3789;3790;4176;5981;5982;5983;6368;6564;6565;7133;7134;7153;7154;7155;7341;8223;8689;8731	1783;1803;1804;1895;2670;2671;3111;3222;6078;6079;6672;6673;6674;6675;9443;9444;9445;10025;10369;10370;11331;11332;11368;11369;11370;11371;11372;11663;13095;13922;14000	1783;1803;1895;2670;3111;3222;6078;6673;9444;10025;10369;10370;11332;11369;11663;13095;13922;14000
gi|753704268;gi|545835022;gi|545835019;gi|545835017;gi|311258972;gi|545835011;gi|545835009;gi|545835007;gi|545835005;gi|545835024;gi|545835015;gi|545835013;gi|350585922;gi|545835037;gi|246856;gi|246858;gi|21431486	gi|753704268;gi|545835022;gi|545835019;gi|545835017;gi|311258972;gi|545835011;gi|545835009;gi|545835007;gi|545835005;gi|545835024;gi|545835015;gi|545835013	11;7;7;7;7;7;7;7;7;6;6;6;5;4;1;1;1	11;7;7;7;7;7;7;7;7;6;6;6;5;4;1;1;1	11;7;7;7;7;7;7;7;7;6;6;6;5;4;1;1;1	>gi|753704268|gb|JAG69678.1| TNF receptor-associated factor 3 [Sus scrofa domesticus];>gi|545835022|ref|XP_005656153.1| PREDICTED: adenylyl cyclase-associated protein 1-like isoform X10 [Sus scrofa];>gi|545835019|ref|XP_005656152.1| PREDICTED: adenylyl cyc	17	11	11	11	36.4	36.4	36.4	51.395	475	475;173;173;173;173;175;175;175;175;172;174;174;374;363;10;18;233	0	104.28	11847000	438790	31420000	35	35				409	29;57;539;571;978;1210;1302;1352;1500;1885;2030	True;True;True;True;True;True;True;True;True;True;True	30;60;564;599;1022;1261;1355;1406;1560;1973;2123	120;121;193;194;195;2009;2010;2088;3445;4144;4145;4146;4428;4429;4430;4549;4550;4551;5087;5088;5089;5090;5091;5092;5093;6391;6392;6393;6394;6832;6833;6834	269;270;376;377;378;379;380;381;3209;3210;3315;5477;6630;6631;6632;7111;7112;7113;7276;7277;7278;8130;8131;8132;8133;8134;8135;8136;10061;10062;10063;10064;10770;10771;10772	270;381;3210;3315;5477;6632;7112;7278;8136;10061;10772
CON__P02538;CON__O95678;CON__Q8VED5;CON__P05787;gi|350583995;gi|194037334;CON__H-INV:HIT000292931;gi|350583957;gi|350583961	CON__P02538	21;8;7;6;4;4;3;3;2	13;3;2;2;2;2;2;2;1	2;0;0;0;0;0;0;0;0	>P02538 SWISS-PROT:P02538 Tax_Id=9606 Gene_Symbol=KRT6A Keratin, type II cytoskeletal 6A	9	21	13	2	33	22.9	3.5	60.044	564	564;551;531;483;466;655;443;593;495	0	93.837	13007000	433560	33877000	23	23			+	3	36;82;172;643;654;697;897;1273;1312;1396;1649;1650;1651;1652;1748;1792;1939;2083;2532;2557;2561	True;True;False;True;False;True;True;False;True;False;True;False;False;False;True;True;True;True;True;False;True	38;85;179;672;683;728;937;1326;1365;1451;1726;1727;1728;1729;1832;1877;2030;2177;2643;2670;2674	140;260;725;726;727;728;2294;2314;2315;2438;3246;3247;4356;4357;4358;4359;4449;4766;4767;4768;5667;5668;5669;5670;5671;5672;5673;5674;5675;5676;5677;5678;5679;5680;5681;5934;5935;6070;6071;6072;6073;6074;6075;6076;6569;7100;8707;8708;8848;8849;8850;8862	294;500;1189;1190;1191;1192;1193;1194;3673;3674;3695;3696;3697;3698;3699;3700;3701;3884;5189;5190;6972;6973;6974;6975;6976;6977;6978;6979;6980;6981;6982;7133;7658;7659;7660;7661;9003;9004;9005;9006;9007;9008;9009;9010;9011;9012;9013;9014;9015;9016;9017;9018;9019;9020;9021;9022;9023;9024;9025;9377;9378;9588;9589;9590;9591;9592;9593;9594;10375;11274;13954;13955;14188;14189;14190;14191;14192;14217	294;500;1191;3673;3696;3884;5189;6976;7133;7660;9003;9005;9018;9025;9377;9589;10375;11274;13955;14192;14217
gi|161511645;gi|17225071;gi|54888454;gi|54888444;gi|54888414;gi|119662893;gi|164614629;gi|164614630;gi|9954317;gi|9954293;gi|9954295;gi|9954291	gi|161511645	6;2;2;2;2;2;1;1;1;1;1;1	2;1;1;1;1;1;0;0;1;1;1;1	0;0;0;0;0;0;0;0;0;0;0;0	>gi|161511645|gb|ABX71839.1| mutated immunoglobulin heavy chain, partial [Sus scrofa]	12	6	2	0	40	16.2	0	27.852	265	265;86;119;124;124;124;64;76;103;104;106;106	0	29.754	4289000	428900	4607900	5	5				105	427;879;1490;1535;2080;2354	False;True;True;False;False;False	446;447;918;1549;1600;2174;2457	1634;1635;1636;1637;1638;1639;3182;3183;3184;5048;5049;5200;5201;5202;5203;5204;5205;5206;5207;5208;5209;5210;5211;5212;5213;5214;5215;5216;5217;5218;5219;5220;5221;5222;5223;5224;5225;5226;5227;5228;5229;5230;5231;5232;5233;5234;5235;5236;5237;5238;5239;5240;5241;5242;5243;5244;5245;5246;5247;5248;5249;5250;5251;5252;5253;5254;5255;5256;5257;5258;5259;5260;5261;5262;5263;5264;5265;5266;5267;5268…	2601;2602;2603;2604;2605;2606;2607;2608;5067;5068;5069;8073;8074;8298;8299;8300;8301;8302;8303;8304;8305;8306;8307;8308;8309;8310;8311;8312;8313;8314;8315;8316;8317;8318;8319;8320;8321;8322;8323;8324;8325;8326;8327;8328;8329;8330;8331;8332;8333;8334;8335;8336;8337;8338;8339;8340;8341;8342;8343;8344;8345;8346;8347;8348;8349;8350;8351;8352;8353;8354;8355;8356;8357;8358;8359;8360;8361;8362;8363;8364…	2604;5067;8073;8300;11239;12836	46	252
gi|54888448;gi|17225073	gi|54888448;gi|17225073	4;3	1;1	0;0	>gi|54888448|emb|CAH68459.1| immunoglobulin heavy chain variable region, partial [Sus scrofa];>gi|17225073|gb|AAL37233.1|AF321848_1 immunoglobulin heavy chain variable region, partial [Sus scrofa]	2	4	1	0	59.2	19.2	0	13.565	125	125;105	0	16.993	2141800	428350	2141800	2	2				398	389;863;1483;1535	False;True;False;False	405;406;902;1542;1600	1507;1508;1509;1510;1511;1512;1513;1514;1515;1516;1517;1518;1519;1520;3147;3148;5034;5035;5036;5200;5201;5202;5203;5204;5205;5206;5207;5208;5209;5210;5211;5212;5213;5214;5215;5216;5217;5218;5219;5220;5221;5222;5223;5224;5225;5226;5227;5228;5229;5230;5231;5232;5233;5234;5235;5236;5237;5238;5239;5240;5241;5242;5243;5244;5245;5246;5247;5248;5249;5250;5251;5252;5253;5254;5255;5256;5257;5258;5259;5260…	2398;2399;2400;2401;2402;2403;2404;2405;2406;2407;2408;2409;2410;2411;2412;2413;2414;2415;2416;2417;2418;2419;2420;2421;2422;2423;2424;2425;5017;5018;8057;8058;8059;8060;8298;8299;8300;8301;8302;8303;8304;8305;8306;8307;8308;8309;8310;8311;8312;8313;8314;8315;8316;8317;8318;8319;8320;8321;8322;8323;8324;8325;8326;8327;8328;8329;8330;8331;8332;8333;8334;8335;8336;8337;8338;8339;8340;8341;8342;8343…	2419;5018;8060;8300	32	85
gi|417515732;gi|350595475	gi|417515732;gi|350595475	4;4	4;4	4;4	>gi|417515732|gb|JAA53677.1| proteasome subunit alpha type-2 [Sus scrofa];>gi|350595475|ref|XP_003360255.2| PREDICTED: proteasome subunit alpha type-2 [Sus scrofa]	2	4	4	4	29.1	29.1	29.1	25.898	234	234;234	0	32.176	4283000	428300	6053000	6	6				280	973;994;1546;2602	True;True;True;True	1017;1038;1611;2718	3433;3477;5296;5297;5298;9002;9003	5449;5525;8473;8474;8475;14429;14430	5449;5525;8475;14430
gi|38230151	gi|38230151	1	1	1	>gi|38230151|gb|AAR14175.1| fructose-bisphosphate aldolase A, partial [Sus scrofa]	1	1	1	1	18.3	18.3	18.3	12.033	109	109	0	8.8998	2935400	419340	2935400	1	1				288	1090	True	1139	3817	6114	6114
gi|54888490	gi|54888490	4	1	0	>gi|54888490|emb|CAH68480.1| immunoglobulin heavy chain variable region, partial [Sus scrofa]	1	4	1	0	64.2	20	0	13.015	120	120	0	18.343	2082900	416580	2082900	1	1				401	389;868;1474;1535	False;False;True;False	405;406;907;1533;1600	1507;1508;1509;1510;1511;1512;1513;1514;1515;1516;1517;1518;1519;1520;3158;3159;3160;3161;5008;5200;5201;5202;5203;5204;5205;5206;5207;5208;5209;5210;5211;5212;5213;5214;5215;5216;5217;5218;5219;5220;5221;5222;5223;5224;5225;5226;5227;5228;5229;5230;5231;5232;5233;5234;5235;5236;5237;5238;5239;5240;5241;5242;5243;5244;5245;5246;5247;5248;5249;5250;5251;5252;5253;5254;5255;5256;5257;5258;5259;5260…	2398;2399;2400;2401;2402;2403;2404;2405;2406;2407;2408;2409;2410;2411;2412;2413;2414;2415;2416;2417;2418;2419;2420;2421;2422;2423;2424;2425;5032;5033;5034;5035;5036;8028;8298;8299;8300;8301;8302;8303;8304;8305;8306;8307;8308;8309;8310;8311;8312;8313;8314;8315;8316;8317;8318;8319;8320;8321;8322;8323;8324;8325;8326;8327;8328;8329;8330;8331;8332;8333;8334;8335;8336;8337;8338;8339;8340;8341;8342;8343…	2419;5035;8028;8300	32	83
gi|350592016	gi|350592016	2	2	2	>gi|350592016|ref|XP_003358886.2| PREDICTED: LOW QUALITY PROTEIN: protein TFG [Sus scrofa]	1	2	2	2	6.2	6.2	6.2	43.236	402	402	0	13.963	4121700	412170	8241900	6	6				276	160;1808	True;True	167;1893	698;699;700;6119;6120;6121	1158;1159;1160;9655;9656;9657	1160;9655
gi|164302;gi|545804168;gi|545804155;gi|545804166	gi|164302;gi|545804168;gi|545804155;gi|545804166	8;8;8;8	8;8;8;8	8;8;8;8	>gi|164302|gb|AAA30983.1| alpha-1 acid glycoprotein, partial [Sus scrofa];>gi|545804168|ref|XP_005660429.1| PREDICTED: alpha-1-acid glycoprotein isoform X2 [Sus scrofa];>gi|545804155|ref|XP_005660423.1| PREDICTED: alpha-1-acid glycoprotein-like [Sus scrofa	4	8	8	8	39.9	39.9	39.9	20.898	183	183;203;203;212	0	55.737	5277200	405940	11186000	16	16				106	51;508;532;1680;1910;1911;2123;2540	True;True;True;True;True;True;True;True	53;533;557;1759;2000;2001;2219;2651	171;1912;1913;1975;1976;1977;5744;5745;6492;6493;6494;7208;7209;8733;8734;8735	337;3075;3076;3164;3165;3166;9109;9110;10259;10260;10261;11445;11446;14002;14003;14004	337;3075;3166;9110;10260;10261;11445;14002
gi|545823604;gi|375004921	gi|545823604;gi|375004921	7;7	7;7	7;7	>gi|545823604|ref|XP_005655478.1| PREDICTED: olfactomedin-like 3 [Sus scrofa];>gi|375004921|gb|AFA28187.1| olfactomedin-like protein 3 precursor [Sus scrofa]	2	7	7	7	23.1	23.1	23.1	45.926	407	407;407	0	71.663	7901400	395070	21478000	13	13				287	683;1143;1278;1586;1788;1864;2554	True;True;True;True;True;True;True	714;1194;1331;1654;1873;1952;2667	2402;3968;4366;4367;5380;6063;6332;6333;8843	3830;3831;6357;6997;6998;6999;7000;8582;8583;9577;9983;9984;14183	3830;6357;6998;8583;9577;9983;14183
gi|119662969	gi|119662969	4	1	1	>gi|119662969|emb|CAJ45426.1| immunoglobulin heavy chain variable region, partial [Sus scrofa]	1	4	1	1	64.3	19.6	19.6	12.088	112	112	0	9.1805	2365000	394170	2365000	3	3				63	389;875;1481;1535	False;True;False;False	405;406;914;1540;1600	1507;1508;1509;1510;1511;1512;1513;1514;1515;1516;1517;1518;1519;1520;3170;5021;5022;5023;5024;5025;5026;5027;5028;5029;5030;5031;5200;5201;5202;5203;5204;5205;5206;5207;5208;5209;5210;5211;5212;5213;5214;5215;5216;5217;5218;5219;5220;5221;5222;5223;5224;5225;5226;5227;5228;5229;5230;5231;5232;5233;5234;5235;5236;5237;5238;5239;5240;5241;5242;5243;5244;5245;5246;5247;5248;5249;5250;5251;5252;5253…	2398;2399;2400;2401;2402;2403;2404;2405;2406;2407;2408;2409;2410;2411;2412;2413;2414;2415;2416;2417;2418;2419;2420;2421;2422;2423;2424;2425;5046;5047;5048;8041;8042;8043;8044;8045;8046;8047;8048;8049;8050;8051;8052;8053;8054;8298;8299;8300;8301;8302;8303;8304;8305;8306;8307;8308;8309;8310;8311;8312;8313;8314;8315;8316;8317;8318;8319;8320;8321;8322;8323;8324;8325;8326;8327;8328;8329;8330;8331;8332…	2419;5046;8054;8300	32	83
gi|6136110;gi|47522786;gi|1752677	gi|6136110;gi|47522786;gi|1752677	9;9;9	9;9;9	9;9;9	>gi|6136110|sp|P79303.3|UGPA_PIG RecName: Full=UTP--glucose-1-phosphate uridylyltransferase; AltName: Full=UDP-glucose pyrophosphorylase; Short=UDPGP; Short=UGPase;>gi|47522786|ref|NP_999145.1| UTP--glucose-1-phosphate uridylyltransferase [Sus scrofa];>gi|	3	9	9	9	27.8	27.8	27.8	56.841	508	508;508;508	0	89.149	9411800	392160	25466000	11	11				124	511;839;1081;1128;1148;1921;2165;2235;2253	True;True;True;True;True;True;True;True;True	536;877;1130;1179;1199;2012;2261;2334;2352	1916;3102;3803;3932;3933;3976;6531;7329;7330;7546;7547;7608	3079;4963;6094;6302;6303;6365;10308;11650;11651;11963;11964;12065	3079;4963;6094;6303;6365;10308;11651;11964;12065
gi|346986466;gi|3914421	gi|346986466;gi|3914421	5;4	5;4	5;4	>gi|346986466|ref|NP_001231384.1| proteasome (prosome, macropain) subunit, beta type, 4 [Sus scrofa];>gi|3914421|sp|Q29384.1|PSB4_PIG RecName: Full=Proteasome subunit beta type-4; AltName: Full=Macropain beta chain; AltName: Full=Multicatalytic endopeptida	2	5	5	5	38.3	38.3	38.3	29.053	264	264;154	0	45.992	4190600	380960	4190600	6	6				250	668;956;1817;2212;2416	True;True;True;True;True	697;999;1904;2310;2521	2346;2347;3386;6157;7470;8246	3756;3757;5378;9724;11854;13152	3756;5378;9724;11854;13152
gi|545824398;gi|350583711;CON__ENSEMBL:ENSBTAP00000016046	gi|545824398;gi|350583711	6;4;2	6;4;2	6;4;2	>gi|545824398|ref|XP_005663793.1| PREDICTED: fibulin-1 isoform X2 [Sus scrofa];>gi|350583711|ref|XP_003126003.3| PREDICTED: fibulin-1 isoform X1 [Sus scrofa]	3	6	6	6	13	13	13	74.946	686	686;706;706	0	56.74	9874200	379780	9989800	8	8				351	229;921;972;989;1442;2106	True;True;True;True;True;True	236;963;1016;1033;1500;2200	1025;3297;3432;3464;4913;4914;4915;7152	1657;5257;5448;5501;7874;7875;7876;11367	1657;5257;5448;5501;7875;11367
gi|346986249	gi|346986249	4	4	4	>gi|346986249|ref|NP_001231282.1| proteasome subunit beta type-1 [Sus scrofa]	1	4	4	4	27.4	27.4	27.4	26.33	241	241	0	37.41	4930900	379300	5250000	8	8				247	62;134;782;1676	True;True;True;True	65;139;818;1755	204;415;416;417;418;2767;5737	394;704;705;706;707;708;4426;9098	394;707;4426;9098
gi|441477595;gi|9954345	gi|441477595	9;2	3;1	1;1	>gi|441477595|dbj|BAM75553.1| IgG heavy chain precursor [Sus scrofa]	2	9	3	1	28	9.6	4.6	52.678	478	478;99	0	24.801	4486400	373870	5935300	5	5				316	343;363;389;865;1481;1535;2234;2431;2493	False;True;False;True;False;False;False;True;False	356;376;405;406;904;1540;1600;2333;2537;2603	1389;1429;1430;1507;1508;1509;1510;1511;1512;1513;1514;1515;1516;1517;1518;1519;1520;3153;3154;5021;5022;5023;5024;5025;5026;5027;5028;5029;5030;5031;5200;5201;5202;5203;5204;5205;5206;5207;5208;5209;5210;5211;5212;5213;5214;5215;5216;5217;5218;5219;5220;5221;5222;5223;5224;5225;5226;5227;5228;5229;5230;5231;5232;5233;5234;5235;5236;5237;5238;5239;5240;5241;5242;5243;5244;5245;5246;5247;5248;5249…	2209;2210;2274;2275;2398;2399;2400;2401;2402;2403;2404;2405;2406;2407;2408;2409;2410;2411;2412;2413;2414;2415;2416;2417;2418;2419;2420;2421;2422;2423;2424;2425;5027;5028;8041;8042;8043;8044;8045;8046;8047;8048;8049;8050;8051;8052;8053;8054;8298;8299;8300;8301;8302;8303;8304;8305;8306;8307;8308;8309;8310;8311;8312;8313;8314;8315;8316;8317;8318;8319;8320;8321;8322;8323;8324;8325;8326;8327;8328;8329…	2210;2275;2419;5028;8054;8300;11947;13247;13765	32	102
gi|545806584;gi|335281566	gi|545806584;gi|335281566	18;18	18;18	2;2	>gi|545806584|ref|XP_005660791.1| PREDICTED: glycogen phosphorylase, muscle form isoform X2 [Sus scrofa];>gi|335281566|ref|XP_003122636.2| PREDICTED: glycogen phosphorylase, muscle form isoformX1 [Sus scrofa]	2	18	18	2	30.6	30.6	2.5	97.269	842	842;842	0	155.56	19052000	373570	51623000	23	23				214	173;325;859;1010;1089;1172;1264;1377;1384;1603;2027;2326;2370;2376;2407;2519;2521;2536	True;True;True;True;True;True;True;True;True;True;True;True;True;True;True;True;True;True	180;338;898;1055;1138;1223;1316;1432;1439;1675;2120;2427;2473;2479;2512;2630;2632;2647	729;730;731;1348;3138;3536;3537;3816;4044;4326;4327;4712;4733;5435;6826;7966;8100;8109;8222;8671;8672;8674;8723	1195;1196;1197;2158;5006;5629;5630;6113;6475;6910;6911;7577;7610;8668;10762;12682;12888;12898;13094;13901;13902;13904;13992	1197;2158;5006;5629;6113;6475;6911;7577;7610;8668;10762;12682;12888;12898;13094;13902;13904;13992
gi|347300165;gi|1907268	gi|347300165;gi|1907268	4;3	4;3	4;3	>gi|347300165|ref|NP_001231397.1| proteasome subunit alpha type-4 [Sus scrofa];>gi|1907268|emb|CAA62960.1| proteasome subunit C9-like protein, partial [Sus scrofa]	2	4	4	4	21.1	21.1	21.1	29.483	261	261;226	0	30.253	4822000	370920	6105500	7	7				251	1389;1861;2230;2594	True;True;True;True	1444;1949;2329;2709	4743;4744;4745;6321;7528;7529;8957	7624;7625;7626;9967;11938;11939;14368	7624;9967;11938;14368
gi|17225062	gi|17225062	3	2	1	>gi|17225062|gb|AAL37228.1|AF321842_1 immunoglobulin heavy chain variable region, partial [Sus scrofa]	1	3	2	1	67.9	48.8	22.6	8.9288	84	84	0	14.757	1454500	363640	2465900	2	2				122	869;1493;1535	True;True;False	908;1552;1600	3162;5054;5200;5201;5202;5203;5204;5205;5206;5207;5208;5209;5210;5211;5212;5213;5214;5215;5216;5217;5218;5219;5220;5221;5222;5223;5224;5225;5226;5227;5228;5229;5230;5231;5232;5233;5234;5235;5236;5237;5238;5239;5240;5241;5242;5243;5244;5245;5246;5247;5248;5249;5250;5251;5252;5253;5254;5255;5256;5257;5258;5259;5260;5261;5262;5263;5264;5265;5266;5267;5268;5269;5270;5271;5272;5273;5274;5275	5037;8079;8298;8299;8300;8301;8302;8303;8304;8305;8306;8307;8308;8309;8310;8311;8312;8313;8314;8315;8316;8317;8318;8319;8320;8321;8322;8323;8324;8325;8326;8327;8328;8329;8330;8331;8332;8333;8334;8335;8336;8337;8338;8339;8340;8341;8342;8343;8344;8345;8346;8347;8348;8349;8350;8351;8352;8353;8354;8355;8356;8357;8358;8359;8360;8361;8362;8363;8364;8365;8366;8367;8368;8369;8370;8371;8372;8373;8374;8375…	5037;8079;8300
gi|147225181;gi|84514209;gi|83816981;gi|83320492;gi|311260176;gi|147225182;gi|110276961;gi|86769244	gi|147225181;gi|84514209;gi|83816981;gi|83320492;gi|311260176;gi|147225182;gi|110276961	3;3;3;3;3;3;3;1	3;3;3;3;3;3;3;1	3;3;3;3;3;3;3;1	>gi|147225181|emb|CAN13313.1| proteasome (prosome, macropain) subunit, beta type, 9 (large multifunctional protease 2) [Sus scrofa];>gi|84514209|gb|ABC59113.1| proteasome beta 9 subunit [Sus scrofa];>gi|83816981|ref|NP_001033050.1| proteasome subunit beta	8	3	3	3	25.7	25.7	25.7	18.595	175	175;219;219;219;219;219;219;90	0	24.664	2904600	363070	2904600	3	3				35	331;522;2374	True;True;True	344;547;2477	1357;1962;8107	2169;3151;12896	2169;3151;12896
gi|545848166	gi|545848166	1	1	1	>gi|545848166|ref|XP_005667321.1| PREDICTED: centrosomal protein of 57 kDa-like [Sus scrofa]	1	1	1	1	2.5	2.5	2.5	46.291	405	405	1	-2	7177500	358880	7177500	1	1	+			366	1232	True	1283	4193	6694	6694	145	183
gi|311265148	gi|311265148	2	2	2	>gi|311265148|ref|XP_003130503.1| PREDICTED: C4b-binding protein beta chain [Sus scrofa]	1	2	2	2	16.3	16.3	16.3	29.1	257	257	0	15.99	3827900	348000	3827900	2	2				198	112;1541	True;True	116;1606	352;5290	636;8466	636;8466
gi|545852940	gi|545852940	7	7	7	>gi|545852940|ref|XP_005656864.1| PREDICTED: Golgi membrane protein 1 [Sus scrofa]	1	7	7	7	20.3	20.3	20.3	47.461	428	428	0	89.687	7804000	339310	13647000	16	16				370	290;493;545;792;1149;1208;1236	True;True;True;True;True;True;True	301;518;571;828;1200;1259;1287	1202;1203;1204;1205;1206;1871;2034;2035;2785;3977;3978;3979;4140;4141;4142;4197	1944;1945;1946;1947;1948;3012;3249;3250;4447;6366;6367;6368;6626;6627;6628;6698	1944;3012;3250;4447;6366;6627;6698
gi|54888482;gi|119662965;gi|3171211;gi|119675188;gi|54888552;gi|54888534;gi|119663057;gi|54888558;gi|54888504;gi|54888554;gi|54888480;gi|54888458;gi|119675186;gi|54888526;gi|54888404;gi|54888570;gi|54888452;gi|119663069;gi|119663039;gi|54888502;gi|1022945;gi|119662931;gi|119662921;gi|119662925;gi|120564809;gi|119663015;gi|54888466;gi|119663053;gi|54888546;gi|119663029;gi|54888522;gi|54888424;gi|1…	gi|54888482;gi|119662965;gi|3171211;gi|119675188;gi|54888552;gi|54888534;gi|119663057;gi|54888558;gi|54888504;gi|54888554;gi|54888480;gi|54888458;gi|119675186;gi|54888526;gi|54888404;gi|54888570;gi|54888452;gi|119663069;gi|119663039;gi|54888502;gi|1022945;gi|119662931;gi|119662921;gi|119662925;gi|120564809;gi|119663015;gi|54888466;gi|119663053;gi|54888546;gi|119663029;gi|54888522;gi|54888424;gi|1…	5;5;4;4;4;4;4;4;4;4;4;4;4;4;4;4;4;4;4;4;4;3;3;3;3;3;3;3;3;3;3;3;3;3;3;3;3;3;3;3;3;3;3;3;3;3;2;2;2;2;2;2;2;2;2;2;2;2;2;2;2;2;2;2;2;2;2;2;2;2;2;2;2;2;1	1;1;0;1;0;0;1;0;0;0;0;0;0;0;0;0;0;0;0;0;0;0;0;0;0;0;0;0;0;0;0;0;0;0;0;0;0;0;0;0;0;0;0;0;0;0;0;0;0;0;0;0;0;0;0;0;0;0;0;0;0;0;0;0;0;0;0;0;0;0;0;0;0;0;0	1;1;0;1;0;0;1;0;0;0;0;0;0;0;0;0;0;0;0;0;0;0;0;0;0;0;0;0;0;0;0;0;0;0;0;0;0;0;0;0;0;0;0;0;0;0;0;0;0;0;0;0;0;0;0;0;0;0;0;0;0;0;0;0;0;0;0;0;0;0;0;0;0;0;0	>gi|54888482|emb|CAH68476.1| immunoglobulin heavy chain variable region, partial [Sus scrofa];>gi|119662965|emb|CAJ45424.1| immunoglobulin heavy chain variable region, partial [Sus scrofa];>gi|3171211|gb|AAC18383.1| immunoglobulin heavy chain variable regi	75	5	1	1	65.3	5.8	5.8	12.928	121	121;121;117;119;120;120;120;122;122;123;123;123;124;126;126;127;128;128;128;129;144;115;116;118;120;120;121;121;123;123;124;124;125;126;126;126;126;126;127;127;129;144;145;145;147;147;116;116;117;117;117;118;120;121;121;122;122;123;123;123;124;124;124;125;125;127;129;130;147;147;148;148;148;148;70	1	-2	2022100	337020	2022100	1	1	+			62	389;868;1481;1535;2630	False;False;False;False;True	405;406;907;1540;1600;2748	1507;1508;1509;1510;1511;1512;1513;1514;1515;1516;1517;1518;1519;1520;3158;3159;3160;3161;5021;5022;5023;5024;5025;5026;5027;5028;5029;5030;5031;5200;5201;5202;5203;5204;5205;5206;5207;5208;5209;5210;5211;5212;5213;5214;5215;5216;5217;5218;5219;5220;5221;5222;5223;5224;5225;5226;5227;5228;5229;5230;5231;5232;5233;5234;5235;5236;5237;5238;5239;5240;5241;5242;5243;5244;5245;5246;5247;5248;5249;5250…	2398;2399;2400;2401;2402;2403;2404;2405;2406;2407;2408;2409;2410;2411;2412;2413;2414;2415;2416;2417;2418;2419;2420;2421;2422;2423;2424;2425;5032;5033;5034;5035;5036;8041;8042;8043;8044;8045;8046;8047;8048;8049;8050;8051;8052;8053;8054;8298;8299;8300;8301;8302;8303;8304;8305;8306;8307;8308;8309;8310;8311;8312;8313;8314;8315;8316;8317;8318;8319;8320;8321;8322;8323;8324;8325;8326;8327;8328;8329;8330…	2419;5035;8054;8300;14636	32	83
gi|441477624;gi|119662955;gi|119662935	gi|441477624	12;2;2	1;1;1	0;0;0	>gi|441477624|dbj|BAM75567.1| IgG heavy chain precursor [Sus scrofa]	3	12	1	0	47.5	4.1	0	51.118	467	467;127;127	0	23.581	5961000	331170	13413000	4	4				322	186;366;427;580;1483;1535;2080;2155;2207;2234;2446;2494	False;False;False;False;True;False;False;False;False;False;False;False	193;379;446;447;608;1542;1600;2174;2251;2305;2333;2552;2604	755;756;757;1434;1634;1635;1636;1637;1638;1639;2106;2107;2108;2109;2110;2111;5034;5035;5036;5200;5201;5202;5203;5204;5205;5206;5207;5208;5209;5210;5211;5212;5213;5214;5215;5216;5217;5218;5219;5220;5221;5222;5223;5224;5225;5226;5227;5228;5229;5230;5231;5232;5233;5234;5235;5236;5237;5238;5239;5240;5241;5242;5243;5244;5245;5246;5247;5248;5249;5250;5251;5252;5253;5254;5255;5256;5257;5258;5259;5260;52…	1227;1228;1229;2279;2601;2602;2603;2604;2605;2606;2607;2608;3334;3335;3336;3337;3338;3339;3340;3341;3342;3343;3344;3345;3346;3347;3348;3349;3350;8057;8058;8059;8060;8298;8299;8300;8301;8302;8303;8304;8305;8306;8307;8308;8309;8310;8311;8312;8313;8314;8315;8316;8317;8318;8319;8320;8321;8322;8323;8324;8325;8326;8327;8328;8329;8330;8331;8332;8333;8334;8335;8336;8337;8338;8339;8340;8341;8342;8343;8344…	1228;2279;2604;3347;8060;8300;11239;11572;11839;11947;13308;13791	46	270
gi|75056777;gi|47522828;gi|298162731;gi|22854661;gi|545813401;gi|335284126	gi|75056777;gi|47522828;gi|298162731;gi|22854661	15;15;15;15;1;1	15;15;15;15;1;1	15;15;15;15;1;1	>gi|75056777|sp|Q8HZV3.1|TFR1_PIG RecName: Full=Transferrin receptor protein 1; Short=TR; Short=TfR; Short=TfR1; Short=Trfr; AltName: CD_antigen=CD71;>gi|47522828|ref|NP_999166.1| transferrin receptor protein 1 [Sus scrofa];>gi|298162731|gb|ADI59732.1| tra	6	15	15	15	22.9	22.9	22.9	86.121	768	768;768;768;768;751;804	0	128.59	11748000	326330	31934000	27	27				167	296;310;757;1123;1266;1329;1585;1686;1815;1878;1882;2006;2261;2324;2442	True;True;True;True;True;True;True;True;True;True;True;True;True;True;True	307;322;792;1174;1318;1383;1653;1765;1901;1966;1970;2099;2360;2425;2548	1215;1248;2699;3917;3918;3919;3920;3921;4332;4333;4334;4493;4494;4495;5379;5756;5757;6148;6149;6373;6384;6757;6758;7620;7964;8325;8326	1970;2014;4330;6283;6284;6285;6286;6287;6924;6925;6926;7189;7190;7191;8581;9124;9125;9710;9711;10031;10053;10670;10671;10672;12082;12680;13296;13297	1970;2014;4330;6283;6925;7190;8581;9124;9711;10031;10053;10670;12082;12680;13296
gi|541628;gi|47522736;gi|1708183	gi|541628;gi|47522736;gi|1708183	6;6;6	6;6;6	6;6;6	>gi|541628|gb|AAC48457.1| hyaluronidase [Sus scrofa];>gi|47522736|ref|NP_999118.1| hemopexin precursor [Sus scrofa];>gi|1708183|sp|P50828.1|HEMO_PIG RecName: Full=Hemopexin; AltName: Full=Hyaluronidase; Flags: Precursor	3	6	6	6	18.1	18.1	18.1	51.305	459	459;459;459	0	46.389	7112600	323300	19334000	15	15				121	77;273;451;659;1987;2276	True;True;True;True;True;True	80;284;472;688;2080;2376	248;249;1158;1159;1160;1736;1737;2323;2324;2325;6705;6706;7794;7795	483;484;485;1881;1882;1883;2769;2770;3709;3710;3711;10599;10600;12383;12384	483;1882;2770;3709;10600;12384
gi|119662987;gi|59799938;gi|119662991	gi|119662987;gi|59799938;gi|119662991	4;3;3	2;2;2	1;1;1	>gi|119662987|emb|CAJ45435.1| immunoglobulin heavy chain variable region, partial [Sus scrofa];>gi|59799938|gb|AAX07328.1| immunoglobulin heavy chain, partial [Sus scrofa];>gi|119662991|emb|CAJ45437.1| immunoglobulin heavy chain variable region, partial [S	3	4	2	1	55	31	14.7	13.935	129	129;117;120	0	18.487	1281500	320380	1281500	2	2				65	389;876;1491;1535	False;True;True;False	405;406;915;1550;1600	1507;1508;1509;1510;1511;1512;1513;1514;1515;1516;1517;1518;1519;1520;3171;5050;5200;5201;5202;5203;5204;5205;5206;5207;5208;5209;5210;5211;5212;5213;5214;5215;5216;5217;5218;5219;5220;5221;5222;5223;5224;5225;5226;5227;5228;5229;5230;5231;5232;5233;5234;5235;5236;5237;5238;5239;5240;5241;5242;5243;5244;5245;5246;5247;5248;5249;5250;5251;5252;5253;5254;5255;5256;5257;5258;5259;5260;5261;5262;5263…	2398;2399;2400;2401;2402;2403;2404;2405;2406;2407;2408;2409;2410;2411;2412;2413;2414;2415;2416;2417;2418;2419;2420;2421;2422;2423;2424;2425;5049;8075;8298;8299;8300;8301;8302;8303;8304;8305;8306;8307;8308;8309;8310;8311;8312;8313;8314;8315;8316;8317;8318;8319;8320;8321;8322;8323;8324;8325;8326;8327;8328;8329;8330;8331;8332;8333;8334;8335;8336;8337;8338;8339;8340;8341;8342;8343;8344;8345;8346;8347…	2419;5049;8075;8300	32	82
gi|327557265;gi|327557263;gi|327557261;gi|75055331;gi|55741579;gi|54794121;gi|167405793	gi|327557265;gi|327557263;gi|327557261;gi|75055331;gi|55741579;gi|54794121;gi|167405793	5;5;5;5;5;5;5	5;5;5;5;5;5;5	5;5;5;5;5;5;5	>gi|327557265|gb|AEB02080.1| mannose-binding lectin A precursor, partial [Sus scrofa];>gi|327557263|gb|AEB02079.1| mannose-binding lectin A precursor, partial [Sus scrofa];>gi|327557261|gb|AEB02078.1| mannose-binding lectin A precursor, partial [Sus scrofa	7	5	5	5	31.5	31.5	31.5	26.312	248	248;248;248;249;249;249;249	0	35.319	5113200	319570	12881000	8	8				116	88;1277;1912;2002;2164	True;True;True;True;True	91;1330;2002;2095;2260	279;280;4365;6495;6749;6750;6751;7328	524;525;6996;10262;10661;10662;10663;11649	525;6996;10262;10662;11649
gi|545803520;gi|545803518;gi|225450;gi|47523626;gi|164726;gi|1174636;gi|545803564;gi|545803562	gi|545803520;gi|545803518;gi|225450;gi|47523626;gi|164726;gi|1174636	13;13;13;12;12;12;1;1	13;13;13;12;12;12;1;1	13;13;13;12;12;12;1;1	>gi|545803520|ref|XP_005654566.1| PREDICTED: transitional endoplasmic reticulum ATPase isoform X2 [Sus scrofa];>gi|545803518|ref|XP_005654565.1| PREDICTED: transitional endoplasmic reticulum ATPase isoform X1 [Sus scrofa];>gi|225450|prf||1303334A valosin p	8	13	13	13	24.6	24.6	24.6	84.493	761	761;761;806;806;806;806;210;255	0	105.1	12161000	311820	14292000	27	27				166	83;437;560;909;961;1182;1268;1298;1565;1620;1731;2067;2375	True;True;True;True;True;True;True;True;True;True;True;True;True	86;458;586;951;1004;1233;1321;1351;1631;1695;1815;2161;2478	261;1663;1664;1665;2060;3269;3270;3271;3404;4069;4070;4071;4342;4419;4420;5336;5573;5574;5575;5576;5577;5897;5898;7010;8108	501;2638;2639;2640;3279;5219;5220;5221;5406;6514;6515;6516;6937;7100;7101;8524;8869;8870;8871;8872;8873;8874;8875;9323;9324;11119;12897	501;2638;3279;5221;5406;6514;6937;7100;8524;8870;9323;11119;12897	60	505
gi|119662989	gi|119662989	4	1	0	>gi|119662989|emb|CAJ45436.1| immunoglobulin heavy chain variable region, partial [Sus scrofa]	1	4	1	0	42.7	12.1	0	13.459	124	124	0	8.0434	2160800	308690	2160800	2	2				66	389;878;1192;1535	False;False;True;False	405;406;917;1243;1600	1507;1508;1509;1510;1511;1512;1513;1514;1515;1516;1517;1518;1519;1520;3178;3179;3180;3181;4107;5200;5201;5202;5203;5204;5205;5206;5207;5208;5209;5210;5211;5212;5213;5214;5215;5216;5217;5218;5219;5220;5221;5222;5223;5224;5225;5226;5227;5228;5229;5230;5231;5232;5233;5234;5235;5236;5237;5238;5239;5240;5241;5242;5243;5244;5245;5246;5247;5248;5249;5250;5251;5252;5253;5254;5255;5256;5257;5258;5259;5260…	2398;2399;2400;2401;2402;2403;2404;2405;2406;2407;2408;2409;2410;2411;2412;2413;2414;2415;2416;2417;2418;2419;2420;2421;2422;2423;2424;2425;5061;5062;5063;5064;5065;5066;6583;6584;8298;8299;8300;8301;8302;8303;8304;8305;8306;8307;8308;8309;8310;8311;8312;8313;8314;8315;8316;8317;8318;8319;8320;8321;8322;8323;8324;8325;8326;8327;8328;8329;8330;8331;8332;8333;8334;8335;8336;8337;8338;8339;8340;8341…	2419;5064;6583;8300	32	83
gi|441477591;gi|411147290;gi|164507;gi|561819	gi|441477591;gi|411147290;gi|164507;gi|561819	11;10;10;9	2;2;2;2	1;1;1;1	>gi|441477591|dbj|BAM75551.1| IgG heavy chain precursor [Sus scrofa];>gi|411147290|dbj|BAM66309.1| IgG heavy chian constant region, partial [Sus scrofa];>gi|164507|gb|AAA51295.1| immunoglobulin gamma-chain [Sus scrofa];>gi|561819|gb|AAA51296.1| This CDS fe	4	11	2	1	37	10	4.5	51.129	470	470;323;467;324	0	18.491	5231100	307710	13812000	8	8				315	366;427;582;793;1520;1535;2080;2095;2234;2354;2494	False;False;False;False;True;False;False;False;False;True;False	379;446;447;610;829;1584;1600;2174;2189;2333;2457;2604	1434;1634;1635;1636;1637;1638;1639;2116;2117;2118;2119;2120;2121;2122;2786;2787;2788;2789;5142;5143;5144;5145;5146;5200;5201;5202;5203;5204;5205;5206;5207;5208;5209;5210;5211;5212;5213;5214;5215;5216;5217;5218;5219;5220;5221;5222;5223;5224;5225;5226;5227;5228;5229;5230;5231;5232;5233;5234;5235;5236;5237;5238;5239;5240;5241;5242;5243;5244;5245;5246;5247;5248;5249;5250;5251;5252;5253;5254;5255;5256…	2279;2601;2602;2603;2604;2605;2606;2607;2608;3363;3364;3365;3366;3367;3368;3369;3370;3371;3372;3373;4448;4449;4450;4451;4452;4453;8210;8211;8212;8213;8214;8298;8299;8300;8301;8302;8303;8304;8305;8306;8307;8308;8309;8310;8311;8312;8313;8314;8315;8316;8317;8318;8319;8320;8321;8322;8323;8324;8325;8326;8327;8328;8329;8330;8331;8332;8333;8334;8335;8336;8337;8338;8339;8340;8341;8342;8343;8344;8345;8346…	2279;2604;3363;4449;8212;8300;11239;11315;11947;12836;13791	46	273
gi|47522644;gi|217672;gi|1583737;gi|1351862;gi|1332717;gi|335308956;gi|545862370	gi|47522644;gi|217672;gi|1583737;gi|1351862;gi|1332717;gi|335308956;gi|545862370	9;9;9;9;9;8;6	9;9;9;9;9;8;6	9;9;9;9;9;8;6	>gi|47522644|ref|NP_999088.1| acylamino-acid-releasing enzyme [Sus scrofa];>gi|217672|dbj|BAA00411.1| acylamino acid-releasing enzyme [Sus scrofa];>gi|1583737|prf||2121361A acyl-AA releasing enzyme;>gi|1351862|sp|P19205.2|ACPH_PIG RecName: Full=Acylamino-a	7	9	9	9	19.4	19.4	19.4	81.243	732	732;732;732;732;732;702;631	0	72.208	9825700	307050	26709000	10	10				89	444;1818;1828;1890;1926;2205;2238;2400;2475	True;True;True;True;True;True;True;True;True	465;1905;1915;1978;2017;2303;2337;2504;2585	1684;6158;6196;6405;6542;7452;7557;8195;8481	2669;9725;9771;10079;10325;11828;11829;11975;13048;13532	2669;9725;9771;10079;10325;11829;11975;13048;13532
gi|571373;gi|2136524	gi|571373;gi|2136524	3;3	1;1	1;1	>gi|571373|gb|AAA67009.1| Ig heavy chain variable VDJ region, partial [Sus scrofa];>gi|2136524|pir||I47184 Ig heavy chain variable VDJ region - pig (fragment)	2	3	1	1	37.7	14.4	14.4	15.95	146	146;146	0	12.577	1783200	297200	1783200	1	1				150	389;871;1483	False;True;False	405;406;910;1542	1507;1508;1509;1510;1511;1512;1513;1514;1515;1516;1517;1518;1519;1520;3165;5034;5035;5036	2398;2399;2400;2401;2402;2403;2404;2405;2406;2407;2408;2409;2410;2411;2412;2413;2414;2415;2416;2417;2418;2419;2420;2421;2422;2423;2424;2425;5040;8057;8058;8059;8060	2419;5040;8060	32	101
gi|346986388;CON__P02584	gi|346986388;CON__P02584	3;2	3;2	3;2	>gi|346986388|ref|NP_001231345.1| profilin-1 [Sus scrofa];>P02584 SWISS-PROT:P02584 (Bos taurus) Profilin-1	2	3	3	3	35.7	35.7	35.7	15.043	140	140;140	0	23.094	2667700	296410	4405300	5	5			+	248	75;282;2126	True;True;True	78;293;2222	241;1176;7213;7214;7215	467;1905;11450;11451;11452	467;1905;11450
gi|194018664;gi|106647532;gi|545850965;gi|120564451;CON__P41361;gi|9885437	gi|194018664;gi|106647532;gi|545850965;gi|120564451;CON__P41361	8;8;8;5;4;3	8;8;8;5;4;3	8;8;8;5;4;3	>gi|194018664|ref|NP_001123430.1| antithrombin-III precursor [Sus scrofa];>gi|106647532|gb|ABF82362.1| antithrombin protein [Sus scrofa];>gi|545850965|ref|XP_005656769.1| PREDICTED: antithrombin-III isoform X1 [Sus scrofa];>gi|120564451|gb|ABM30151.1| anti	6	8	8	8	20.3	20.3	20.3	52.385	463	463;463;476;247;465;169	0	60.967	8142500	290800	19016000	19	19			+	34	142;344;664;787;1456;2029;2213;2255	True;True;True;True;True;True;True;True	149;357;693;823;1514;2122;2311;2354	442;443;1390;2338;2339;2774;2775;2776;4945;6828;6829;6830;6831;7471;7611;7612;7613	740;741;2211;3748;3749;4435;4436;4437;7920;10764;10765;10766;10767;10768;10769;11855;12068;12069;12070	741;2211;3749;4436;7920;10767;11855;12069
gi|356460899;gi|2988346;gi|84028183;gi|1245842	gi|356460899;gi|2988346;gi|84028183	10;8;8;1	10;8;8;1	10;8;8;1	>gi|356460899|ref|NP_999466.2| catalase [Sus scrofa];>gi|2988346|dbj|BAA25301.1| catalase [Sus scrofa];>gi|84028183|sp|O62839.4|CATA_PIG RecName: Full=Catalase	4	10	10	10	27.9	27.9	27.9	59.929	527	527;503;527;19	0	69.326	8334000	287380	19032000	13	13				285	11;715;742;771;778;913;1355;1436;1511;1668	True;True;True;True;True;True;True;True;True;True	11;748;777;807;814;955;1409;1494;1575;1745	38;2490;2572;2573;2739;2752;2753;3276;3277;4557;4904;5123;5715	95;3969;4104;4105;4381;4396;4397;5227;5228;7286;7865;8176;9075	95;3969;4104;4381;4397;5227;7286;7865;8176;9075
gi|223634463;gi|220981067	gi|223634463;gi|220981067	3;3	3;3	3;3	>gi|223634463|ref|NP_001138690.1| CD82 antigen [Sus scrofa];>gi|220981067|emb|CAM58512.1| lymphocyte cell-surface protein [Sus scrofa]	2	3	3	3	9	9	9	29.668	266	266;266	0	23.135	2868900	286890	3334900	6	6				161	1383;1751;1957	True;True;True	1438;1835;2049	4732;5942;5943;5944;6608;6609	7609;9387;9388;9389;10431;10432;10433;10434	7609;9388;10432
gi|571415;gi|2136545	gi|571415;gi|2136545	1;1	1;1	1;1	>gi|571415|gb|AAA67030.1| Ig heavy chain variable VDJ region, partial [Sus scrofa];>gi|2136545|pir||I47205 Ig heavy chain variable VDJ region - pig (fragment)	2	1	1	1	8	8	8	15.238	138	138;138	0	8.0184	1407700	281540	3826500	3	3				154	1477	True	1536	5015;5016;5017	8035;8036;8037	8036
gi|545831437;gi|545831434;gi|293597641;gi|289186811;gi|289186809	gi|545831437;gi|545831434;gi|293597641;gi|289186811;gi|289186809	1;1;1;1;1	1;1;1;1;1	1;1;1;1;1	>gi|545831437|ref|XP_005653337.1| PREDICTED: apolipoprotein C-II isoform X2 [Sus scrofa];>gi|545831434|ref|XP_005653336.1| PREDICTED: apolipoprotein C-II isoform X1 [Sus scrofa];>gi|293597641|ref|NP_001170799.1| apolipoprotein C-II precursor [Sus scrofa];>	5	1	1	1	7.9	7.9	7.9	11.138	101	101;101;101;101;101	0.0029851	6.9788	1119100	279780	3042100	3	3				177	189	True	196	760;761	1232;1233;1234	1234
gi|164503;gi|54888434;gi|119662927	gi|164503	10;2;2	1;1;1	0;0;0	>gi|164503|gb|AAA51292.1| immunoglobulin gamma-chain [Sus scrofa]	3	10	1	0	40.7	4.2	0	51.45	474	474;121;124	0	36.166	4688700	275810	7395600	3	3				113	186;366;427;580;753;1535;2155;2207;2234;2446	False;False;False;False;True;False;False;False;False;False	193;379;446;447;608;788;1600;2251;2305;2333;2552	755;756;757;1434;1634;1635;1636;1637;1638;1639;2106;2107;2108;2109;2110;2111;2682;2683;2684;5200;5201;5202;5203;5204;5205;5206;5207;5208;5209;5210;5211;5212;5213;5214;5215;5216;5217;5218;5219;5220;5221;5222;5223;5224;5225;5226;5227;5228;5229;5230;5231;5232;5233;5234;5235;5236;5237;5238;5239;5240;5241;5242;5243;5244;5245;5246;5247;5248;5249;5250;5251;5252;5253;5254;5255;5256;5257;5258;5259;5260;52…	1227;1228;1229;2279;2601;2602;2603;2604;2605;2606;2607;2608;3334;3335;3336;3337;3338;3339;3340;3341;3342;3343;3344;3345;3346;3347;3348;3349;3350;4299;4300;4301;8298;8299;8300;8301;8302;8303;8304;8305;8306;8307;8308;8309;8310;8311;8312;8313;8314;8315;8316;8317;8318;8319;8320;8321;8322;8323;8324;8325;8326;8327;8328;8329;8330;8331;8332;8333;8334;8335;8336;8337;8338;8339;8340;8341;8342;8343;8344;8345…	1228;2279;2604;3347;4301;8300;11572;11839;11947;13308	46	277
gi|119663049	gi|119663049	4	2	1	>gi|119663049|emb|CAJ45469.1| immunoglobulin heavy chain variable region, partial [Sus scrofa]	1	4	2	1	60.8	30.8	18.5	13.77	130	130	0	14.968	1372200	274430	3015600	3	3				70	752;874;1482;1537	False;True;False;True	787;913;1541;1602	2681;3169;5032;5033;5278;5279	4298;5045;8055;8056;8438;8439	4298;5045;8055;8439
gi|441477628	gi|441477628	15	2	1	>gi|441477628|dbj|BAM75569.1| IgG heavy chain precursor [Sus scrofa]	1	15	2	1	57.2	9.1	5.1	51.547	472	472	0	25.674	4747900	263770	4747900	3	3				323	426;529;581;880;1475;1535;2004;2080;2095;2156;2233;2417;2478;2493;2511	False;False;False;True;True;False;False;False;False;False;False;False;False;False;False	445;554;609;919;1534;1600;2097;2174;2189;2252;2332;2522;2588;2603;2621	1624;1625;1626;1627;1628;1629;1630;1631;1632;1633;1971;1972;2112;2113;2114;2115;3185;5009;5010;5200;5201;5202;5203;5204;5205;5206;5207;5208;5209;5210;5211;5212;5213;5214;5215;5216;5217;5218;5219;5220;5221;5222;5223;5224;5225;5226;5227;5228;5229;5230;5231;5232;5233;5234;5235;5236;5237;5238;5239;5240;5241;5242;5243;5244;5245;5246;5247;5248;5249;5250;5251;5252;5253;5254;5255;5256;5257;5258;5259;5260…	2588;2589;2590;2591;2592;2593;2594;2595;2596;2597;2598;2599;2600;3160;3161;3351;3352;3353;3354;3355;3356;3357;3358;3359;3360;3361;3362;5070;8029;8030;8298;8299;8300;8301;8302;8303;8304;8305;8306;8307;8308;8309;8310;8311;8312;8313;8314;8315;8316;8317;8318;8319;8320;8321;8322;8323;8324;8325;8326;8327;8328;8329;8330;8331;8332;8333;8334;8335;8336;8337;8338;8339;8340;8341;8342;8343;8344;8345;8346;8347…	2588;3161;3358;5070;8029;8300;10665;11239;11315;11592;11946;13158;13566;13765;13864
gi|545825788;gi|253578;gi|253577;gi|545825960;gi|545825785;gi|47606435;gi|350584112;gi|255683363;gi|545825779;gi|545825955;gi|545825782;gi|545825952;gi|545825949	gi|545825788;gi|253578;gi|253577;gi|545825960;gi|545825785;gi|47606435;gi|350584112;gi|255683363;gi|545825779;gi|545825955;gi|545825782;gi|545825952;gi|545825949	4;4;4;4;4;4;4;4;4;3;3;3;3	4;4;4;4;4;4;4;4;4;3;3;3;3	4;4;4;4;4;4;4;4;4;3;3;3;3	>gi|545825788|ref|XP_005655647.1| PREDICTED: myosin light polypeptide 6 isoform X4 [Sus scrofa];>gi|253578|gb|AAB22894.1| myosin light chain isoform LC17b [swine, aorta smooth muscle, Peptide, 150 aa];>gi|253577|gb|AAB22893.1| myosin light chain isoform LC	13	4	4	4	34.3	34.3	34.3	16.006	143	143;150;150;151;151;151;151;151;205;152;152;160;160	0	32.636	2590100	259010	5003900	8	8				171	110;237;464;2388	True;True;True;True	114;244;487;2492	344;1047;1770;1771;8143;8144;8145;8146	624;1702;2829;2830;12949;12950;12951;12952	624;1702;2829;12949
gi|54888440	gi|54888440	3	1	1	>gi|54888440|emb|CAH68455.1| immunoglobulin heavy chain variable region, partial [Sus scrofa]	1	3	1	1	39.5	12.1	12.1	13.281	124	124	0.0029499	6.9144	1028200	257050	2284400	1	1				397	389;1481;1536	False;False;True	405;406;1540;1601	1507;1508;1509;1510;1511;1512;1513;1514;1515;1516;1517;1518;1519;1520;5021;5022;5023;5024;5025;5026;5027;5028;5029;5030;5031;5276;5277	2398;2399;2400;2401;2402;2403;2404;2405;2406;2407;2408;2409;2410;2411;2412;2413;2414;2415;2416;2417;2418;2419;2420;2421;2422;2423;2424;2425;8041;8042;8043;8044;8045;8046;8047;8048;8049;8050;8051;8052;8053;8054;8436;8437	2419;8054;8437	32	83
gi|347300184;gi|347300498	gi|347300184;gi|347300498	1;1	1;1	1;1	>gi|347300184|ref|NP_001231407.1| pancreatic trypsin inhibitor-like isoform 2 precursor [Sus scrofa];>gi|347300498|ref|NP_001231406.1| pancreatic trypsin inhibitor-like isoform 1 precursor [Sus scrofa]	2	1	1	1	8.6	8.6	8.6	11.815	105	105;128	0.0077121	5.9974	1281000	256210	3482200	2	2				253	316	True	329	1268;1269	2047;2048	2048
gi|545808291;gi|545808294;gi|311248127;gi|124913112;gi|86451118;gi|545808286;gi|545808284;gi|113205658	gi|545808291;gi|545808294;gi|311248127;gi|124913112;gi|86451118;gi|545808286;gi|545808284;gi|113205658	2;2;2;1;1;1;1;1	2;2;2;1;1;1;1;1	2;2;2;1;1;1;1;1	>gi|545808291|ref|XP_005661151.1| PREDICTED: serum amyloid A protein-like [Sus scrofa];>gi|545808294|ref|XP_005661152.1| PREDICTED: serum amyloid A-2 protein-like isoform X2 [Sus scrofa];>gi|311248127|ref|XP_003122985.1| PREDICTED: serum amyloid A-2 protei	8	2	2	2	16.1	16.1	16.1	13.36	118	118;129;129;89;130;130;130;130	0	12.473	1786200	255180	1786200	3	3				184	30;911	True;True	31;953	122;3273	271;5223;5224	271;5223
gi|975233;gi|74039787;gi|47523508;gi|1717817;gi|1016032;gi|1009702	gi|975233;gi|74039787;gi|47523508;gi|1717817;gi|1016032;gi|1009702	2;2;2;2;2;2	2;2;2;2;2;2	2;2;2;2;2;2	>gi|975233|emb|CAA61120.1| putative transthyretin (prealbumin), partial [Sus scrofa];>gi|74039787|gb|AAZ94915.1| transthyretin [Sus scrofa];>gi|47523508|ref|NP_999377.1| transthyretin precursor [Sus scrofa];>gi|1717817|sp|P50390.1|TTHY_PIG RecName: Full=Tr	6	2	2	2	25.2	25.2	25.2	15.792	147	147;150;150;150;150;150	0	11.967	1780800	254400	4840600	2	2				25	109;2214	True;True	113;2312	343;7472;7473	623;11856;11857	623;11857
gi|20152623;gi|89143155;gi|47523278;gi|42539448;gi|40557566	gi|20152623;gi|89143155;gi|47523278;gi|42539448;gi|40557566	1;1;1;1;1	1;1;1;1;1	1;1;1;1;1	>gi|20152623|emb|CAD29724.1| resistin, partial [Sus scrofa];>gi|89143155|emb|CAJ43117.1| resistin [Sus scrofa];>gi|47523278|ref|NP_998948.1| resistin precursor [Sus scrofa];>gi|42539448|gb|AAS18680.1| resistin [Sus scrofa];>gi|40557566|gb|AAR88080.1| resis	5	1	1	1	21.8	21.8	21.8	5.8036	55	55;109;109;109;109	0	7.0359	981370	245340	981370	1	1				145	435	True	455	1655	2627	2627
gi|532691465;gi|514052641;gi|51507663;gi|51507653;gi|51507647;gi|51507641;gi|51507639;gi|34368546;gi|51507655;gi|51507645;gi|51507637;gi|532691459;gi|532691453;gi|510703054;gi|145559669;gi|281324307;gi|281324303;gi|281324301;gi|18699305;gi|532691471;gi|62083311;gi|62083309;gi|532691477;gi|20378734;gi|20378732;gi|18699303;gi|18699299;gi|18699295;gi|532691473;gi|510702617;gi|23598126;gi|668592644;g…	gi|532691465;gi|514052641;gi|51507663;gi|51507653;gi|51507647;gi|51507641;gi|51507639;gi|34368546;gi|51507655;gi|51507645;gi|51507637;gi|532691459;gi|532691453;gi|510703054;gi|145559669;gi|281324307;gi|281324303;gi|281324301;gi|18699305;gi|532691471;gi|62083311;gi|62083309;gi|532691477;gi|20378734;gi|20378732;gi|18699303;gi|18699299;gi|18699295;gi|532691473;gi|510702617;gi|23598126;gi|668592644;g…	4;4;4;4;4;4;4;4;4;4;4;4;4;4;4;4;4;4;4;4;4;4;4;4;4;4;4;4;4;4;4;4;4;4;4;4;4;4;4;4;4;4;4;4;4;4;4;4;4;4;4;4;4;4;4;4;4;4;4;4;4;4;4;4;4;4;4;4;4;4;4;4;4;4;4;4;4;4;4;4;4;4;4;4;4;4;4;4;4;4;4;4;4;4;4;4;4;4;4;4;4;4;4;4;4;4;4;4;4;4;4;4;4;4;4;4;4;4;4;4;4;4;4;4;4;4;4;4;4;4;4;4;4;4;4;4;4;4;4;4;4;4;4;4;4;4;4;4;4;4;4;4;4;4;4;4;4;4;4;4;4;4;4;4;4;4;4;4;4;4;4;4;4;4;4;4;4;4;4;4;4;4;4;4;4;4;4;4;4;4;4;4;4;4;4;4;4;4;4;4…	4;4;4;4;4;4;4;4;4;4;4;4;4;4;4;4;4;4;4;4;4;4;4;4;4;4;4;4;4;4;4;4;4;4;4;4;4;4;4;4;4;4;4;4;4;4;4;4;4;4;4;4;4;4;4;4;4;4;4;4;4;4;4;4;4;4;4;4;4;4;4;4;4;4;4;4;4;4;4;4;4;4;4;4;4;4;4;4;4;4;4;4;4;4;4;4;4;4;4;4;4;4;4;4;4;4;4;4;4;4;4;4;4;4;4;4;4;4;4;4;4;4;4;4;4;4;4;4;4;4;4;4;4;4;4;4;4;4;4;4;4;4;4;4;4;4;4;4;4;4;4;4;4;4;4;4;4;4;4;4;4;4;4;4;4;4;4;4;4;4;4;4;4;4;4;4;4;4;4;4;4;4;4;4;4;4;4;4;4;4;4;4;4;4;4;4;4;4;4;4…	0;0;0;0;0;0;0;0;0;0;0;0;0;0;0;0;0;0;0;0;0;0;0;0;0;0;0;0;0;0;0;0;0;0;0;0;0;0;0;0;0;0;0;0;0;0;0;0;0;0;0;0;0;0;0;0;0;0;0;0;0;0;0;0;0;0;0;0;0;0;0;0;0;0;0;0;0;0;0;0;0;0;0;0;0;0;0;0;0;0;0;0;0;0;0;0;0;0;0;0;0;0;0;0;0;0;0;0;0;0;0;0;0;0;0;0;0;0;0;0;0;0;0;0;0;0;0;0;0;0;0;0;0;0;0;0;0;0;0;0;0;0;0;0;0;0;0;0;0;0;0;0;0;0;0;0;0;0;0;0;0;0;0;0;0;0;0;0;0;0;0;0;0;0;0;0;0;0;0;0;0;0;0;0;0;0;0;0;0;0;0;0;0;0;0;0;0;0;0;0…	>gi|532691465|dbj|BAN78927.1| MHC class I antigen, partial [Sus scrofa];>gi|514052641|dbj|BAN57515.1| MHC class I antigen, partial [Sus scrofa];>gi|51507663|emb|CAE46357.1| MHC class I antigen, partial [Sus scrofa];>gi|51507653|emb|CAE46352.1| MHC class I	566	4	4	0	20.2	20.2	0	33.324	292	292;292;295;295;295;295;295;295;298;298;298;299;313;322;344;350;350;350;350;351;352;352;352;352;352;352;352;352;355;355;356;360;360;360;361;361;361;361;361;361;361;361;361;361;361;361;361;361;361;361;361;361;361;361;361;361;361;361;361;361;361;361;361;361;361;361;361;361;361;361;361;361;361;361;361;361;361;361;361;361;361;361;361;361;361;361;361;361;361;361;361;361;361;361;361;361;361;361;361;361…	0	26.436	4614100	242850	7909200	8	8				42	281;662;1017;2504	True;True;True;True	292;691;1063;2614	1173;1174;1175;2333;2334;3607;3608;8624	1902;1903;1904;3743;3744;5755;5756;13828	1902;3743;5755;13828
gi|343887360;gi|311259070;gi|545835350;gi|545835348;gi|311259068	gi|343887360	3;1;1;1;1	3;1;1;1;1	3;1;1;1;1	>gi|343887360|ref|NP_001230581.1| proteasome (prosome, macropain) subunit, alpha type [Sus scrofa]	5	3	3	3	19.4	19.4	19.4	27.867	248	248;212;227;237;250	0	50.764	3254200	232440	4809700	7	7				238	1530;1729;1860	True;True;True	1595;1813;1948	5188;5189;5894;5895;6318;6319;6320	8280;8281;9320;9321;9964;9965;9966	8280;9320;9964
gi|571403;gi|2136539	gi|571403;gi|2136539	3;3	1;1	1;1	>gi|571403|gb|AAA67024.1| Ig heavy chain variable VDJ region, partial [Sus scrofa];>gi|2136539|pir||I47199 Ig heavy chain variable VDJ region - pig (fragment)	2	3	1	1	27.7	7.7	7.7	16.903	155	155;155	0	7.0746	2194400	219440	5965000	1	1				152	307;1478;1535	False;True;False	318;319;1537;1600	1235;1236;1237;1238;1239;1240;1241;5018;5200;5201;5202;5203;5204;5205;5206;5207;5208;5209;5210;5211;5212;5213;5214;5215;5216;5217;5218;5219;5220;5221;5222;5223;5224;5225;5226;5227;5228;5229;5230;5231;5232;5233;5234;5235;5236;5237;5238;5239;5240;5241;5242;5243;5244;5245;5246;5247;5248;5249;5250;5251;5252;5253;5254;5255;5256;5257;5258;5259;5260;5261;5262;5263;5264;5265;5266;5267;5268;5269;5270;5271…	1996;1997;1998;1999;2000;2001;2002;2003;2004;2005;8038;8298;8299;8300;8301;8302;8303;8304;8305;8306;8307;8308;8309;8310;8311;8312;8313;8314;8315;8316;8317;8318;8319;8320;8321;8322;8323;8324;8325;8326;8327;8328;8329;8330;8331;8332;8333;8334;8335;8336;8337;8338;8339;8340;8341;8342;8343;8344;8345;8346;8347;8348;8349;8350;8351;8352;8353;8354;8355;8356;8357;8358;8359;8360;8361;8362;8363;8364;8365;8366…	1997;8038;8300	59	103
gi|319401911;gi|315321422	gi|319401911;gi|315321422	1;1	1;1	1;1	>gi|319401911|ref|NP_001188310.1| adenosylhomocysteinase-like protein 1 [Sus scrofa];>gi|315321422|gb|ADU04838.1| adenosylhomocysteinase-like protein 1 [Sus scrofa]	2	1	1	1	3.4	3.4	3.4	58.951	530	530;530	1	-2	5979300	213550	16254000	1	1	+			207	537	True	562	2002	3202	3202	77	127
gi|311269525	gi|311269525	1	1	1	>gi|311269525|ref|XP_003132526.1| PREDICTED: transmembrane 4 L6 family member 1 [Sus scrofa]	1	1	1	1	5	5	5	21.78	202	202	0.0029762	6.94	633750	211250	1722700	2	2				201	2062	True	2156	6991;6992	11087;11088	11087
gi|51491902;gi|51095266;gi|545825794;gi|545825791	gi|51491902;gi|51095266;gi|545825794;gi|545825791	4;4;4;4	4;4;4;4	4;4;4;4	>gi|51491902|ref|NP_001003925.1| ovarian and testicular apolipoprotein N precursor [Sus scrofa];>gi|51095266|gb|AAT95402.1| ovarian and testicular apolipoprotein N [Sus scrofa];>gi|545825794|ref|XP_005655649.1| PREDICTED: ovarian and testicular apolipoprot	4	4	4	4	15.4	15.4	15.4	28.596	254	254;254;313;314	0	28.463	2738700	210670	7444600	4	4				331	327;1449;2084;2373	True;True;True;True	340;1507;2178;2476	1350;4928;7101;8106	2160;7895;11275;12895	2160;7895;11275;12895
gi|545821947;gi|47523048;gi|18202922;gi|11065896	gi|545821947;gi|47523048;gi|18202922;gi|11065896	19;18;18;18	19;18;18;18	14;13;13;13	>gi|545821947|ref|XP_005663156.1| PREDICTED: coagulation factor V isoform X1 [Sus scrofa];>gi|47523048|ref|NP_999285.1| coagulation factor V precursor [Sus scrofa];>gi|18202922|sp|Q9GLP1.1|FA5_PIG RecName: Full=Coagulation factor V; AltName: Full=Activated	4	19	19	14	10.3	10.3	8	252.33	2223	2223;2258;2258;2258	0	142.67	18562000	203980	32423000	44	44				345	24;50;139;175;649;732;814;1161;1166;1215;1314;1361;1594;1601;1614;1635;1945;2410;2620	True;True;True;True;True;True;True;True;True;True;True;True;True;True;True;True;True;True;True	24;52;146;182;678;767;851;1212;1217;1266;1368;1415;1665;1673;1688;1711;2036;2515;2736	94;95;96;97;98;170;436;733;2305;2306;2307;2547;2919;2920;2921;4010;4011;4012;4026;4027;4161;4162;4453;4454;4568;5414;5432;5433;5552;5620;5621;5622;6580;6581;6582;8227;8228;8229;9051	229;230;231;232;233;336;734;1199;1200;3685;3686;3687;3688;4064;4671;4672;4673;6416;6417;6418;6435;6436;6652;6653;7137;7138;7300;8639;8665;8666;8840;8939;8940;8941;10389;10390;10391;10392;10393;10394;10395;13099;13100;13101;14505	233;336;734;1199;3688;4064;4671;6416;6436;6652;7138;7300;8639;8665;8840;8939;10390;13101;14505
gi|347582595	gi|347582595	7	7	7	>gi|347582595|ref|NP_001231568.1| histidine-rich glycoprotein precursor [Sus scrofa]	1	7	7	7	12.5	12.5	12.5	61.552	553	553	0	69.014	5609100	200330	14898000	16	16				256	335;415;416;675;801;2018;2510	True;True;True;True;True;True;True	348;433;434;704;838;2111;2620	1368;1369;1588;1589;1590;2366;2367;2881;6789;6790;8641;8642	2185;2186;2516;2517;2518;2519;2520;3780;3781;3782;4614;10711;10712;10713;13855;13856	2186;2517;2520;3780;4614;10712;13856
gi|545832244	gi|545832244	3	2	2	>gi|545832244|ref|XP_005664827.1| PREDICTED: myosin-14 [Sus scrofa]	1	3	2	2	5.1	2.8	2.8	76.618	669	669	0	11.971	6641100	195330	18052000	2	2				353	585;1542;1710	True;True;False	613;1607;1792	2131;5291;5828;5829;5830;5831	3383;8467;9222;9223;9224;9225	3383;8467;9224
gi|350580983	gi|350580983	2	2	2	>gi|350580983|ref|XP_003480935.1| PREDICTED: receptor expression-enhancing protein 5 [Sus scrofa]	1	2	2	2	11.6	11.6	11.6	21.401	189	189	0	15.504	1561100	195140	3420600	3	3				261	984;1726	True;True	1028;1810	3452;5885;5886;5887	5485;9309;9310;9311	5485;9310
gi|57527987;gi|164582;gi|127236;gi|57527982;gi|164586;gi|131821	gi|57527987;gi|164582;gi|127236	9;9;9;2;2;2	9;9;9;2;2;2	7;7;7;0;0;0	>gi|57527987|ref|NP_001009578.1| moesin [Sus scrofa];>gi|164582|gb|AAB02864.1| moesin [Sus scrofa];>gi|127236|sp|P26042.3|MOES_PIG RecName: Full=Moesin; AltName: Full=Membrane-organizing extension spike protein	6	9	9	7	16.1	16.1	12.5	67.66	577	577;577;577;583;583;583	0	67.473	6417800	194480	14407000	19	19				85	124;162;165;770;1092;1150;1196;1848;2209	True;True;True;True;True;True;True;True;True	129;169;172;806;1141;1201;1247;1935;2307	392;393;702;703;708;709;710;711;2736;2737;2738;3819;3820;3821;3822;3980;4116;6270;6271;7462	680;681;1162;1163;1169;1170;1171;1172;4378;4379;4380;6116;6117;6118;6119;6369;6594;9880;9881;11844	680;1163;1169;4379;6118;6369;6594;9880;11844
gi|147225186;gi|113196863;gi|147225185;gi|311260174;gi|147225184;gi|3122620;gi|47522620;gi|4545092	gi|147225186;gi|113196863;gi|147225185;gi|311260174;gi|147225184;gi|3122620;gi|47522620;gi|4545092	2;2;2;2;2;1;1;1	2;2;2;2;2;1;1;1	2;2;2;2;2;1;1;1	>gi|147225186|emb|CAN13318.1| proteasome (prosome, macropain) subunit, beta type, 8 (large multifunctional protease 7) [Sus scrofa];>gi|113196863|gb|ABI31729.1| low molecular mass protein 7, partial [Sus scrofa];>gi|147225185|emb|CAN13317.1| proteasome (pr	8	2	2	2	13	13	13	23.14	208	208;249;252;276;276;104;260;260	0	17.019	2518800	193760	2518800	3	3				41	2319;2553	True;True	2420;2666	7951;7952;8842	12667;12668;14182	12668;14182
gi|456754283;gi|350586371;gi|350586367	gi|456754283;gi|350586371;gi|350586367	7;7;4	7;7;4	7;7;4	>gi|456754283|gb|JAA74260.1| coagulation factor XIII, A1 polypeptide [Sus scrofa];>gi|350586371|ref|XP_001927665.3| PREDICTED: coagulation factor XIII A chain [Sus scrofa];>gi|350586367|ref|XP_003356564.2| PREDICTED: coagulation factor XIII A chain-like, p	3	7	7	7	10.6	10.6	10.6	83.343	735	735;735;466	0	45.215	7393700	189580	10803000	15	15				269	722;822;954;1275;2167;2325;2413	True;True;True;True;True;True;True	756;859;997;1328;2263;2426;2518	2517;2518;2519;2520;2955;3379;3380;3381;4362;4363;7335;7336;7337;7965;8239	4022;4023;4024;4025;4759;5367;5368;5369;6993;6994;11657;11658;11659;12681;13143	4023;4759;5367;6994;11658;12681;13143
CON__Q3T052	CON__Q3T052	6	1	1	>Q3T052 TREMBL:Q3T052;Q5EA67 (Bos taurus) Inter-alpha (Globulin) inhibitor H4	1	6	1	1	7.2	1.4	1.4	101.51	916	916	0	10.533	7332000	188000	12060000	3	3			+	20	0;618;693;929;1559;2463	True;False;False;False;False;False	0;646;724;971;1624;2570	0;1;2221;2222;2425;2426;2427;2428;2429;3312;5325;5326;8417;8418;8419;8420;8421	0;1;2;3572;3573;3859;3860;3861;3862;3863;3864;3865;5273;8512;8513;13435;13436;13437;13438;13439;13440;13441	1;3572;3864;5273;8512;13435
gi|51491910;gi|51243728;gi|545835788	gi|51491910;gi|51243728;gi|545835788	9;9;8	9;9;8	9;9;8	>gi|51491910|ref|NP_001003926.1| angiopoietin-related protein 3 precursor [Sus scrofa];>gi|51243728|gb|AAS90833.2| angiopoietin-like protein 3 [Sus scrofa];>gi|545835788|ref|XP_005665438.1| PREDICTED: angiopoietin-related protein 3 isoform X1 [Sus scrofa]	3	9	9	9	22.5	22.5	22.5	53.658	462	462;462;392	0	70.586	4607100	184280	12523000	13	13				332	361;651;1435;1691;1781;1872;2125;2139;2588	True;True;True;True;True;True;True;True;True	374;680;1493;1771;1866;1960;2221;2235;2703	1425;2309;4903;5776;5777;6040;6366;7212;7251;8936	2259;3690;7864;9156;9157;9551;9552;10023;11449;11512;11513;11514;14341	2259;3690;7864;9156;9551;10023;11449;11513;14341
gi|119662993	gi|119662993	3	1	1	>gi|119662993|emb|CAJ45438.1| immunoglobulin heavy chain variable region, partial [Sus scrofa]	1	3	1	1	34.1	9.5	9.5	13.5	126	126	0	7.0746	1099000	183170	2987500	2	2				67	306;1535;1943	False;False;True	317;1600;2034	1231;1232;1233;1234;5200;5201;5202;5203;5204;5205;5206;5207;5208;5209;5210;5211;5212;5213;5214;5215;5216;5217;5218;5219;5220;5221;5222;5223;5224;5225;5226;5227;5228;5229;5230;5231;5232;5233;5234;5235;5236;5237;5238;5239;5240;5241;5242;5243;5244;5245;5246;5247;5248;5249;5250;5251;5252;5253;5254;5255;5256;5257;5258;5259;5260;5261;5262;5263;5264;5265;5266;5267;5268;5269;5270;5271;5272;5273;5274;5275…	1992;1993;1994;1995;8298;8299;8300;8301;8302;8303;8304;8305;8306;8307;8308;8309;8310;8311;8312;8313;8314;8315;8316;8317;8318;8319;8320;8321;8322;8323;8324;8325;8326;8327;8328;8329;8330;8331;8332;8333;8334;8335;8336;8337;8338;8339;8340;8341;8342;8343;8344;8345;8346;8347;8348;8349;8350;8351;8352;8353;8354;8355;8356;8357;8358;8359;8360;8361;8362;8363;8364;8365;8366;8367;8368;8369;8370;8371;8372;8373…	1994;8300;10386
gi|443429615;gi|545834087;gi|545834084;gi|322510017;gi|269994011;gi|118403806;gi|115522023	gi|443429615;gi|545834087;gi|545834084;gi|322510017;gi|269994011;gi|118403806;gi|115522023	2;2;2;2;2;2;2	2;2;2;2;2;2;2	2;2;2;2;2;2;2	>gi|443429615|gb|AGC92762.1| cell division cycle 42, partial [Sus scrofa];>gi|545834087|ref|XP_005656097.1| PREDICTED: cell division control protein 42 homolog isoform X2 [Sus scrofa];>gi|545834084|ref|XP_005656096.1| PREDICTED: cell division control prote	7	2	2	2	35.8	35.8	35.8	7.5176	67	67;191;191;191;191;191;191	0	17.119	914920	182980	1625500	3	3				49	1772;2203	True;True	1857;2301	6010;6011;7447;7448;7449	9504;9505;11823;11824;11825	9504;11824
gi|119662877	gi|119662877	2	1	1	>gi|119662877|emb|CAJ45380.1| immunoglobulin heavy chain variable region, partial [Sus scrofa]	1	2	1	1	29.7	17.2	17.2	13.826	128	128	0	9.8302	1079800	179970	1079800	2	2				59	866;1535	True;False	905;1600	3155;3156;5200;5201;5202;5203;5204;5205;5206;5207;5208;5209;5210;5211;5212;5213;5214;5215;5216;5217;5218;5219;5220;5221;5222;5223;5224;5225;5226;5227;5228;5229;5230;5231;5232;5233;5234;5235;5236;5237;5238;5239;5240;5241;5242;5243;5244;5245;5246;5247;5248;5249;5250;5251;5252;5253;5254;5255;5256;5257;5258;5259;5260;5261;5262;5263;5264;5265;5266;5267;5268;5269;5270;5271;5272;5273;5274;5275	5029;5030;8298;8299;8300;8301;8302;8303;8304;8305;8306;8307;8308;8309;8310;8311;8312;8313;8314;8315;8316;8317;8318;8319;8320;8321;8322;8323;8324;8325;8326;8327;8328;8329;8330;8331;8332;8333;8334;8335;8336;8337;8338;8339;8340;8341;8342;8343;8344;8345;8346;8347;8348;8349;8350;8351;8352;8353;8354;8355;8356;8357;8358;8359;8360;8361;8362;8363;8364;8365;8366;8367;8368;8369;8370;8371;8372;8373;8374;8375…	5029;8300
gi|9954335	gi|9954335	2	1	1	>gi|9954335|gb|AAG09014.1| immunoglobulin heavy chain, partial [Sus scrofa]	1	2	1	1	35.1	14.4	14.4	10.581	97	97	0.0028818	6.771	895150	179030	895150	1	1				413	753;867	False;True	788;906	2682;2683;2684;3157	4299;4300;4301;5031	4301;5031
gi|545837880;gi|545837899;gi|545837883;gi|51317314;gi|350583428;gi|335287016;gi|194039824;gi|545895216;gi|194039884;gi|335291892;gi|311259877;gi|194039812;gi|194036302;gi|545893926;gi|545893923;gi|545837783;gi|545837780;gi|545837777;gi|545837774;gi|545837771;gi|545848863;gi|545848861	gi|545837880;gi|545837899;gi|545837883;gi|51317314;gi|350583428;gi|335287016;gi|194039824	4;4;3;3;3;3;3;1;1;1;1;1;1;1;1;1;1;1;1;1;1;1	4;4;3;3;3;3;3;1;1;1;1;1;1;1;1;1;1;1;1;1;1;1	4;4;3;3;3;3;3;1;1;1;1;1;1;1;1;1;1;1;1;1;1;1	>gi|545837880|ref|XP_005665717.1| PREDICTED: histone H2A type 1-F-like [Sus scrofa];>gi|545837899|ref|XP_001928646.4| PREDICTED: uncharacterized protein LOC100154071 [Sus scrofa];>gi|545837883|ref|XP_005665718.1| PREDICTED: histone H4-like [Sus scrofa];>gi	22	4	4	4	23.3	23.3	23.3	27.591	253	253;272;103;103;103;103;103;97;128;130;130;130;130;147;147;147;147;147;147;147;266;274	0	31.693	2316900	178230	4601200	5	5				356	295;2242;2336;2344	True;True;True;True	306;2341;2437;2447	1214;7570;7993;7994;8025	1969;12000;12717;12718;12781	1969;12000;12718;12781
gi|545866714	gi|545866714	3	1	1	>gi|545866714|ref|XP_003358926.3| PREDICTED: vitamin K-dependent protein S-like [Sus scrofa]	1	3	1	1	28.8	9.8	9.8	16.673	153	153	0	13.498	1054000	175660	1635800	2	2				376	121;1162;2455	True;False;False	126;1213;2562	386;387;4013;4014;8398;8399	674;675;6419;6420;13408;13409	674;6419;13408
gi|417515715;gi|545824833;gi|358251602;gi|358251600;gi|358251598;gi|545860381;gi|545860373;gi|545889490;gi|545832250;gi|545894385;REV__gi|350586921	gi|417515715;gi|545824833	29;27;9;9;9;6;6;2;2;1;1	29;27;9;9;9;6;6;2;2;1;1	28;26;9;9;9;6;6;2;2;1;1	>gi|417515715|gb|JAA53670.1| N-myosin-9 [Sus scrofa];>gi|545824833|ref|XP_005663885.1| PREDICTED: myosin-9 [Sus scrofa]	11	29	29	28	19	19	18.2	226.45	1960	1960;1878;318;318;318;1591;1892;830;1303;447;1337	0	254.33	17568000	172240	35800000	53	53				308	74;101;106;107;138;177;249;326;485;496;549;779;1033;1048;1207;1296;1462;1468;1523;1636;1710;1775;1780;1839;1999;2168;2210;2409;2443	True;True;True;True;True;True;True;True;True;True;True;True;True;True;True;True;True;True;True;True;True;True;True;True;True;True;True;True;True	77;104;109;110;145;184;259;339;508;521;575;815;1081;1097;1258;1349;1521;1527;1587;1712;1792;1860;1865;1926;2092;2264;2308;2514;2549	240;326;336;337;434;435;735;1099;1349;1842;1843;1875;1876;2043;2754;3667;3725;4138;4139;4417;4966;4967;4968;4969;4982;5162;5163;5623;5624;5828;5829;5830;5831;6021;6022;6023;6024;6037;6038;6039;6236;6237;6736;6737;6738;6739;7338;7463;7464;8224;8225;8226;8327;8328	466;598;614;615;732;733;1202;1778;2159;2969;2970;3016;3017;3262;4398;5851;5972;6624;6625;7097;7949;7950;7951;7952;7970;8246;8247;8942;8943;9222;9223;9224;9225;9516;9517;9518;9519;9548;9549;9550;9830;9831;10643;10644;10645;10646;11660;11845;11846;13096;13097;13098;13298;13299	466;598;614;615;733;1202;1778;2159;2970;3016;3262;4398;5851;5972;6624;7097;7952;7970;8246;8943;9224;9518;9548;9830;10643;11660;11846;13097;13298
gi|904141;gi|335309466;CON__P07224	gi|904141	5;2;1	5;2;1	3;2;1	>gi|904141|gb|AAA70382.1| protein S, partial [Sus scrofa]	3	5	5	3	9.1	9.1	4.6	71.914	648	648;394;675	0	31.706	5189400	167400	6702700	7	7				411	730;1162;1250;1938;2455	True;True;True;True;True	765;1213;1301;2029;2562	2536;4013;4014;4257;6568;8398;8399	4042;6419;6420;6818;10373;10374;13408;13409	4042;6419;6818;10373;13408
gi|311259609	gi|311259609	5	5	5	>gi|311259609|ref|XP_003128180.1| PREDICTED: alpha-1B-glycoprotein [Sus scrofa]	1	5	5	5	11	11	11	54.396	500	500	0	31.059	3279800	163990	8552000	13	13				193	333;1280;1450;2359;2421	True;True;True;True;True	346;1333;1508;2462;2526	1364;4370;4929;4930;4931;8073;8074;8259;8260;8261;8262	2181;7003;7896;7897;7898;7899;12849;12850;13189;13190;13191;13192;13193	2181;7003;7899;12850;13192
CON__Q2UVX4	CON__Q2UVX4	18	1	1	>Q2UVX4 SWISS-PROT:Q2UVX4 (Bos taurus) Complement C3 precursor	1	18	1	1	11.2	0.5	0.5	187.37	1662	1662	0	11.059	15932000	162570	28970000	3	3			+	19	14;17;85;410;411;635;678;975;1130;1217;1227;1452;1632;1712;2135;2152;2315;2352	False;False;False;False;False;False;False;False;False;False;True;False;False;False;False;False;False;False	14;17;88;427;428;664;708;1019;1181;1268;1278;1510;1708;1794;2231;2248;2416;2455	45;46;47;48;49;50;51;54;55;56;57;264;265;1573;1574;1575;1576;1577;2272;2273;2274;2382;2383;2384;2385;3439;3440;3441;3442;3935;3936;3937;3938;4165;4166;4167;4168;4169;4170;4171;4184;4185;4186;4935;4936;4937;5613;5614;5615;5616;5834;5835;5836;5837;7230;7231;7232;7233;7234;7235;7236;7283;7284;7285;7286;7937;7938;7939;7940;7941;7942;7943;8053;8054;8055;8056	106;107;108;109;110;111;112;113;114;115;116;117;118;119;120;124;125;126;127;128;129;130;131;505;506;507;508;2499;2500;2501;2502;2503;3648;3649;3650;3651;3652;3804;3805;3806;3807;5463;5464;5465;5466;5467;5468;5469;5470;5471;5472;5473;5474;6305;6306;6307;6308;6656;6657;6658;6659;6660;6661;6662;6663;6664;6665;6666;6683;6684;6685;7903;7904;7905;7906;7907;7908;7909;8931;8932;8933;8934;8935;9231;9232;9…	116;127;507;2499;2501;3650;3804;5464;6307;6662;6684;7908;8933;9231;11478;11563;12651;12822
gi|345441750;gi|545848996;gi|335292694	gi|345441750;gi|545848996	8;5;2	8;5;2	8;5;2	>gi|345441750|ref|NP_001230836.1| heat shock 70kDa protein 8 [Sus scrofa];>gi|545848996|ref|XP_005667500.1| PREDICTED: heat shock cognate 71 kDa protein-like, partial [Sus scrofa]	3	8	8	8	17.6	17.6	17.6	70.865	646	646;460;636	0	64.349	5148800	156020	11772000	17	17				241	260;289;666;1692;1693;1932;1958;2048	True;True;True;True;True;True;True;True	271;300;695;1772;1773;2023;2050;2141	1125;1201;2341;2342;2343;2344;5778;5779;5780;5781;5782;5783;6562;6610;6611;6612;6895	1817;1943;3751;3752;3753;3754;9158;9159;9160;9161;9162;9163;10367;10435;10436;10437;10905	1817;1943;3752;9158;9163;10367;10436;10905
gi|545857085;gi|311266924;gi|545887872	gi|545857085;gi|311266924;gi|545887872	2;2;2	2;2;2	2;2;2	>gi|545857085|ref|XP_005668719.1| PREDICTED: beta-2-glycoprotein 1 isoform X2 [Sus scrofa];>gi|311266924|ref|XP_003131314.1| PREDICTED: beta-2-glycoprotein 1 isoform X1 [Sus scrofa];>gi|545887872|ref|XP_005674134.1| PREDICTED: uncharacterized protein LOC10	3	2	2	2	13.2	13.2	13.2	31.947	287	287;345;736	0	18.667	2313600	154240	4963100	7	7				200	200;2102	True;True	207;2196	808;809;7139;7140;7141;7142	1324;1325;1326;11346;11347;11348;11349	1325;11348
gi|6175057;gi|47523544;gi|2125;gi|545804192	gi|6175057;gi|47523544;gi|2125	15;15;15;3	15;15;15;3	15;15;15;3	>gi|6175057|sp|Q29116.1|TENA_PIG RecName: Full=Tenascin; Short=TN; AltName: Full=Cytotactin; AltName: Full=GMEM; AltName: Full=GP 150-225; AltName: Full=Glioma-associated-extracellular matrix antigen; AltName: Full=Hexabrachion; AltName: Full=JI; AltName:	4	15	15	15	12	12	12	191.4	1746	1746;1746;1746;755	0	116.48	13274000	152570	13274000	17	17				147	18;193;552;587;613;614;1142;1167;1308;1413;1441;2132;2229;2327;2545	True;True;True;True;True;True;True;True;True;True;True;True;True;True;True	18;200;578;615;641;642;1193;1218;1361;1469;1499;2228;2328;2428;2656	58;775;2046;2137;2215;2216;3967;4028;4436;4839;4912;7225;7526;7527;7967;8819	132;1251;3265;3395;3566;3567;6356;6437;7119;7770;7771;7873;11468;11936;11937;12683;14145	132;1251;3265;3395;3566;3567;6356;6437;7119;7771;7873;11468;11937;12683;14145
gi|545862394;gi|178056732;gi|115394800;gi|545862397;gi|178056266;gi|115394798;gi|562018;gi|545823819;gi|178056392;gi|115394796;gi|147223426;gi|147223317;gi|562020;gi|562016;gi|350585959;gi|545889708;gi|545829733;gi|545850492;gi|147223422;gi|147223314;gi|545850495;gi|545823821;gi|194041214;gi|285002241;gi|147223424;gi|147223316;gi|285002237;gi|147223421;gi|147223310;gi|285002235;gi|265260546;gi|14…	gi|545862394;gi|178056732;gi|115394800;gi|545862397;gi|178056266;gi|115394798	8;8;8;7;7;7;3;2;2;2;1;1;1;1;1;1;1;1;1;1;1;1;1;1;1;1;1;1;1;1;1;1;1;1;1;1;1;1;1;1;1;1	8;8;8;7;7;7;3;2;2;2;1;1;1;1;1;1;1;1;1;1;1;1;1;1;1;1;1;1;1;1;1;1;1;1;1;1;1;1;1;1;1;1	8;8;8;7;7;7;3;2;2;2;1;1;1;1;1;1;1;1;1;1;1;1;1;1;1;1;1;1;1;1;1;1;1;1;1;1;1;1;1;1;1;1	>gi|545862394|ref|XP_005669625.1| PREDICTED: guanine nucleotide-binding protein G(i) subunit alpha-2 isoform X1 [Sus scrofa];>gi|178056732|ref|NP_001116588.1| guanine nucleotide-binding protein G(i) subunit alpha-2 [Sus scrofa];>gi|115394800|gb|ABI97194.1|	42	8	8	8	32.7	32.7	32.7	40.464	355	355;355;355;303;355;355;188;354;354;354;75;75;133;209;215;236;294;302;318;318;329;330;350;379;379;379;380;384;384;394;394;394;394;395;395;395;397;397;632;632;1005;1005	0	55.52	2509800	147640	6162800	10	10				47	133;212;1049;1107;1410;1777;2227;2550	True;True;True;True;True;True;True;True	138;219;1098;1156;1465;1862;2326;2663	414;977;3726;3727;3847;4834;6027;6028;7519;8836	703;1588;5973;5974;6149;7765;9522;9523;11929;14172	703;1588;5973;6149;7765;9522;11929;14172
CON__P08779	CON__P08779	15	6	6	>P08779 SWISS-PROT:P08779 Tax_Id=9606 Gene_Symbol=KRT16 Keratin, type I cytoskeletal 16	1	15	6	6	37	18	18	51.267	473	473	0	67.117	4514300	145620	11341000	14	14			+	8	102;152;180;286;622;927;1104;1163;1265;1281;1318;1917;2386;2471;2548	False;True;False;True;True;False;True;False;False;False;False;True;False;False;True	105;159;187;297;650;969;1153;1214;1317;1334;1372;2008;2490;2581;2660;2661	327;328;329;677;739;740;741;1194;1195;1196;1197;2228;2229;2230;2231;3307;3308;3309;3840;3841;4015;4016;4017;4328;4329;4330;4331;4371;4372;4373;4374;4463;6516;8135;8136;8137;8459;8460;8461;8462;8463;8829;8830	599;600;601;1135;1206;1207;1208;1936;1937;1938;1939;3579;3580;3581;3582;5267;5268;5269;6139;6140;6421;6422;6423;6912;6913;6914;6915;6916;6917;6918;6919;6920;6921;6922;6923;7004;7005;7006;7007;7008;7009;7010;7011;7150;7151;10292;12930;12931;12932;13495;13496;13497;13498;13499;13500;13501;13502;13503;14161;14162	600;1135;1207;1937;3580;5269;6140;6423;6915;7006;7151;10292;12931;13498;14161	10	370
gi|47523186;gi|4097833;gi|3023580;gi|2317892;gi|84380276	gi|47523186;gi|4097833;gi|3023580;gi|2317892;gi|84380276	4;4;4;4;2	4;4;4;4;2	4;4;4;4;2	>gi|47523186|ref|NP_998998.1| connective tissue growth factor precursor [Sus scrofa];>gi|4097833|gb|AAD00174.1| connective tissue growth factor [Sus scrofa];>gi|3023580|sp|O19113.1|CTGF_PIG RecName: Full=Connective tissue growth factor; AltName: Full=CCN f	5	4	4	4	14.9	14.9	14.9	37.946	349	349;349;349;349;147	0	32.052	3275000	142390	3275000	5	5				169	264;1305;1936;2098	True;True;True;True	275;1358;2027;2192	1135;4433;6566;7132	1835;1836;7116;10371;11330	1835;7116;10371;11330
gi|545878751	gi|545878751	3	3	3	>gi|545878751|ref|XP_005672704.1| PREDICTED: fibrinogen-like protein 1 [Sus scrofa]	1	3	3	3	12.5	12.5	12.5	32.227	280	280	0	25.568	1842800	141760	2218800	6	6				387	382;483;1660	True;True;True	396;506;1737	1477;1478;1836;1837;5700	2349;2350;2955;2956;2957;9049	2349;2957;9049
gi|311248177	gi|311248177	3	3	3	>gi|311248177|ref|XP_003123013.1| PREDICTED: proteasome subunit alpha type-1 [Sus scrofa]	1	3	3	3	14.1	14.1	14.1	29.555	263	263	0	20.774	2523900	140210	3031800	6	6				186	163;1013;2140	True;True;True	170;1059;2236	704;705;3598;3599;7252	1164;1165;1166;5742;5743;11515	1164;5742;11515
gi|169646366;gi|34582609;gi|6016165;gi|47523090;gi|2384497;gi|212549567	gi|169646366;gi|34582609;gi|6016165;gi|47523090;gi|2384497;gi|212549567	2;1;1;1;1;1	2;1;1;1;1;1	2;1;1;1;1;1	>gi|169646366|ref|NP_001108627.1| glutathione peroxidase 3 precursor [Sus scrofa];>gi|34582609|gb|AAQ76090.1| glutathione peroxidase 3, partial [Sus scrofa];>gi|6016165|sp|O18994.1|GPX5_PIG RecName: Full=Epididymal secretory glutathione peroxidase; AltName	6	2	2	2	12.8	12.8	12.8	25.834	226	226;116;219;219;219;221	0	11.296	1395400	139540	2953100	4	4				119	707;2626	True;True	739;2744	2461;2462;9089;9090	3928;3929;14563;14564	3928;14564
gi|262072808;gi|78100037;gi|47522648;gi|1041667	gi|262072808;gi|78100037;gi|47522648;gi|1041667	7;5;5;5	7;5;5;5	7;5;5;5	>gi|262072808|dbj|BAI47712.1| hexosaminidase B (beta polypeptide) [Sus scrofa];>gi|78100037|sp|Q29548.2|HEXB_PIG RecName: Full=Beta-hexosaminidase subunit beta; AltName: Full=65 kDa epididymal boar protein; AltName: Full=Beta-N-acetylhexosaminidase subunit	4	7	7	7	21.2	21.2	21.2	62.109	538	538;531;531;531	0	47.597	3762400	139350	3762400	7	7				173	717;945;1464;1730;1977;2392;2631	True;True;True;True;True;True;True	751;987;1523;1814;2070;2496;2749	2498;3356;4971;5896;6677;8150;9114	3983;5331;7954;9322;10546;12957;14637	3983;5331;7954;9322;10546;12957;14637
gi|119663067	gi|119663067	1	1	1	>gi|119663067|emb|CAJ45478.1| immunoglobulin heavy chain variable region, partial [Sus scrofa]	1	1	1	1	16.4	16.4	16.4	12.645	116	116	0.00271	6.3033	696000	139200	696000	1	1				72	1480	True	1539	5020	8040	8040
gi|545854854;gi|545854851;gi|194040624;gi|545854859;gi|335306431;gi|545886393	gi|545854854;gi|545854851;gi|194040624;gi|545854859	10;10;10;10;2;2	10;10;10;10;2;2	10;10;10;10;2;2	>gi|545854854|ref|XP_005668475.1| PREDICTED: plastin-2 isoform X3 [Sus scrofa];>gi|545854851|ref|XP_005668474.1| PREDICTED: plastin-2 isoform X2 [Sus scrofa];>gi|194040624|ref|XP_001929173.1| PREDICTED: plastin-2 isoformX1 [Sus scrofa];>gi|545854859|ref|XP	6	10	10	10	21.1	21.1	21.1	70.203	627	627;627;627;636;630;639	0	76.163	5111500	134510	13747000	14	14				136	2;39;224;547;788;1164;1627;1722;2412;2542	True;True;True;True;True;True;True;True;True;True	2;41;231;573;824;1215;1702;1806;2517;2653	5;145;146;1009;2040;2777;4018;4019;4020;4021;5600;5874;8238;8810	9;299;300;1635;3259;4438;6424;6425;6426;6427;8914;9292;13142;14129	9;300;1635;3259;4438;6426;8914;9292;13142;14129
gi|335288480;gi|41176597	gi|335288480	49;2	2;0	2;0	>gi|335288480|ref|XP_001925235.3| PREDICTED: LOW QUALITY PROTEIN: alpha-2-macroglobulin [Sus scrofa]	2	49	2	2	50.4	2	2	163.73	1476	1476;136	0	22.68	8816400	133580	9643500	5	5				219	4;52;71;113;198;337;359;449;568;628;633;728;785;828;840;851;931;1043;1053;1115;1132;1155;1205;1374;1406;1447;1630;1783;1799;1814;1886;1891;1904;1972;1982;2032;2045;2121;2206;2250;2351;2454;2461;2487;2497;2499;2568;2575;2596	False;False;False;False;False;False;False;False;False;False;False;False;False;False;False;False;False;False;False;False;False;False;False;False;False;False;False;False;False;False;False;False;False;True;False;False;False;False;False;False;False;False;True;False;False;False;False;False;False	4;54;55;74;117;205;350;372;470;596;657;662;763;821;865;878;890;973;1091;1102;1164;1183;1206;1256;1429;1461;1505;1705;1706;1868;1884;1900;1974;1979;1994;2064;2075;2125;2138;2217;2304;2349;2454;2560;2561;2568;2597;2607;2609;2681;2688;2711	7;172;173;174;175;176;177;178;179;180;230;231;232;233;234;235;236;237;353;354;803;804;805;806;1371;1372;1373;1374;1420;1421;1422;1423;1696;1697;1698;1699;2084;2252;2253;2254;2263;2264;2265;2534;2770;2771;2772;3069;3103;3129;3130;3315;3316;3317;3318;3699;3700;3701;3702;3703;3732;3733;3734;3872;3873;3874;3875;3876;3877;3878;3879;3940;3941;3942;3990;3991;3992;3993;4134;4135;4707;4821;4822;4823;4824;…	11;338;339;340;341;342;343;344;345;346;347;348;349;350;453;454;455;456;457;458;459;460;461;462;637;638;1316;1317;1318;1319;1320;1321;1322;2188;2189;2190;2191;2253;2254;2255;2256;2257;2688;2689;2690;2691;3311;3613;3614;3615;3627;3628;3629;4040;4429;4430;4431;4432;4433;4912;4964;4997;4998;5276;5277;5278;5279;5280;5917;5918;5919;5920;5921;5922;5979;5980;5981;6208;6209;6210;6211;6212;6213;6214;6215;6…	11;339;454;637;1317;2188;2254;2688;3311;3614;3627;4040;4429;4912;4964;4997;5279;5919;5980;6212;6312;6384;6619;7572;7748;7882;8928;9560;9624;9708;10067;10088;10233;10523;10566;10776;10894;11440;11831;12057;12817;13402;13433;13656;13809;13813;14260;14284;14371	99;100;101	145;832;962
gi|311246990;gi|157410762	gi|311246990	10;1	10;1	10;1	>gi|311246990|ref|XP_003122442.1| PREDICTED: mucin-2, partial [Sus scrofa]	2	10	10	10	15	15	15	104.39	958	958;83	0	91.136	6462500	131890	17567000	12	12				183	65;235;441;850;896;1403;1990;2090;2245;2535	True;True;True;True;True;True;True;True;True;True	68;242;462;889;936;1458;2083;2184;2344;2646	221;1044;1679;3128;3245;4812;6713;7108;7109;7578;8722	444;1691;1692;2664;4996;5188;7731;10613;11283;11284;12013;13991	444;1692;2664;4996;5188;7731;10613;11284;12013;13991
gi|545895133	gi|545895133	2	2	2	>gi|545895133|ref|XP_005659104.1| PREDICTED: collagen alpha-1(VI) chain-like, partial [Sus scrofa]	1	2	2	2	7.8	7.8	7.8	42.56	412	412	0	12.811	2459400	129440	4757500	4	4				396	861;1672	True;True	900;1749	3141;3142;5721;5722	5009;5010;9081;9082	5010;9082
gi|350583503	gi|350583503	2	2	2	>gi|350583503|ref|XP_003125877.3| PREDICTED: synaptonemal complex protein 1 [Sus scrofa]	1	2	2	2	2.3	2.3	2.3	114.79	982	982	0	18.382	7175600	128140	11916000	7	7				267	16;1901	True;True	16;1991	53;6455;6456;6457;6458;6459	123;10193;10194;10195;10196;10197;10198;10199	123;10194	112	412
gi|112980809;gi|365813034;gi|365813031;gi|365813028;gi|545800815;gi|545800812;gi|47522782;gi|309795;gi|284808894;gi|284808892;gi|188035850;gi|17933431;gi|1168611	gi|112980809;gi|365813034;gi|365813031;gi|365813028;gi|545800815;gi|545800812;gi|47522782;gi|309795;gi|284808894;gi|284808892;gi|188035850;gi|17933431;gi|1168611	1;1;1;1;1;1;1;1;1;1;1;1;1	1;1;1;1;1;1;1;1;1;1;1;1;1	1;1;1;1;1;1;1;1;1;1;1;1;1	>gi|112980809|gb|ABI29186.1| beta-2-microglobulin, partial [Sus scrofa];>gi|365813034|pdb|3QQ4|B Chain B, Crystal Structure Of Swine Major Histocompatibility Complex Class I Sla-1 0401 And Identification Of 2009 Pandemic Swine-Origin Influenza A H1n1 Virus	13	1	1	1	16.7	16.7	16.7	5.8085	48	48;100;100;100;118;118;118;118;118;118;118;118;118	0.0027933	6.5113	253850	126930	348260	3	3				39	1041	True	1089	3696;3697	5913;5914;5915	5914
gi|335284409;gi|545814279	gi|335284409;gi|545814279	2;2	2;2	2;2	>gi|335284409|ref|XP_003354603.1| PREDICTED: transmembrane protein C16orf54 homolog isoform X1 [Sus scrofa];>gi|545814279|ref|XP_005655153.1| PREDICTED: transmembrane protein C16orf54 homolog isoform X2 [Sus scrofa]	2	2	2	2	11.8	11.8	11.8	24.162	221	221;232	0	19.776	888200	126890	1889400	3	3				217	1804;2467	True;True	1889;2576	6110;8445;8446	9637;13476;13477	9637;13476
gi|571405;gi|2136540	gi|571405;gi|2136540	3;3	1;1	1;1	>gi|571405|gb|AAA67025.1| Ig heavy chain variable VDJ region, partial [Sus scrofa];>gi|2136540|pir||I47200 Ig heavy chain variable VDJ region - pig (fragment)	2	3	1	1	33.3	12.7	12.7	16.294	150	150;150	0	7.0403	1126800	125200	1126800	1	1				153	306;1479;1535	False;True;False	317;1538;1600	1231;1232;1233;1234;5019;5200;5201;5202;5203;5204;5205;5206;5207;5208;5209;5210;5211;5212;5213;5214;5215;5216;5217;5218;5219;5220;5221;5222;5223;5224;5225;5226;5227;5228;5229;5230;5231;5232;5233;5234;5235;5236;5237;5238;5239;5240;5241;5242;5243;5244;5245;5246;5247;5248;5249;5250;5251;5252;5253;5254;5255;5256;5257;5258;5259;5260;5261;5262;5263;5264;5265;5266;5267;5268;5269;5270;5271;5272;5273;5274…	1992;1993;1994;1995;8039;8298;8299;8300;8301;8302;8303;8304;8305;8306;8307;8308;8309;8310;8311;8312;8313;8314;8315;8316;8317;8318;8319;8320;8321;8322;8323;8324;8325;8326;8327;8328;8329;8330;8331;8332;8333;8334;8335;8336;8337;8338;8339;8340;8341;8342;8343;8344;8345;8346;8347;8348;8349;8350;8351;8352;8353;8354;8355;8356;8357;8358;8359;8360;8361;8362;8363;8364;8365;8366;8367;8368;8369;8370;8371;8372…	1994;8039;8300
gi|529161346;gi|529161340;gi|1522685;gi|3915624;gi|545889198;gi|545811619;gi|545811621;gi|350596246;gi|529161354;gi|529161352;gi|529161350;gi|529161348;gi|529161344;gi|529161342;gi|529161338;gi|350596244;gi|317681941;gi|315507093	gi|529161346;gi|529161340;gi|1522685;gi|3915624;gi|545889198;gi|545811619;gi|545811621;gi|350596246;gi|529161354;gi|529161352;gi|529161350;gi|529161348;gi|529161344;gi|529161342;gi|529161338;gi|350596244;gi|317681941;gi|315507093	2;2;2;2;2;2;2;2;2;2;2;2;2;2;2;2;2;2	2;2;2;2;2;2;2;2;2;2;2;2;2;2;2;2;2;2	2;2;2;2;2;2;2;2;2;2;2;2;2;2;2;2;2;2	>gi|529161346|gb|AGS56952.1| truncated homocysteine methyltransferase splice variant 6 [Sus scrofa];>gi|529161340|gb|AGS56949.1| truncated homocysteine methyltransferase splice variant 3 [Sus scrofa];>gi|1522685|gb|AAC48632.1| betaine-homocysteine methyltr	18	2	2	2	15.3	15.3	15.3	27.603	255	255;255;272;278;397;397;401;401;407;407;407;407;407;407;407;407;407;407	0	12.167	1614500	124200	4388800	3	3				98	58;68	True;True	61;71	196;225;226	382;448;449	382;448
gi|545822329;gi|545822327;gi|545822325;gi|545822323;gi|545822321;gi|545822331	gi|545822329;gi|545822327;gi|545822325;gi|545822323;gi|545822321;gi|545822331	6;6;6;5;5;5	6;6;6;5;5;5	6;6;6;5;5;5	>gi|545822329|ref|XP_005663231.1| PREDICTED: nitrilase homolog 1 isoform X5 [Sus scrofa];>gi|545822327|ref|XP_005663230.1| PREDICTED: nitrilase homolog 1 isoform X4 [Sus scrofa];>gi|545822325|ref|XP_005663229.1| PREDICTED: nitrilase homolog 1 isoform X3 [S	6	6	6	6	27.5	27.5	27.5	31.899	291	291;291;291;312;328;345	0	35.673	1892100	118260	5143200	6	6				346	90;187;1056;1337;1338;1501	True;True;True;True;True;True	93;194;1105;1391;1392;1561	286;758;3744;4512;4513;5094	533;1230;5992;7213;7214;8137	533;1230;5992;7213;7214;8137
gi|1699400;gi|54888562;gi|54888516;gi|54888514;gi|119663045;gi|119663023;gi|119662939;gi|54888456;gi|1022941;gi|1022931;gi|1022925;gi|54888474;gi|1022953;gi|59799932;gi|59799936;gi|119662879;gi|119662995;gi|54888564;gi|9954307;gi|9954315	gi|1699400;gi|54888562;gi|54888516;gi|54888514;gi|119663045;gi|119663023;gi|119662939;gi|54888456;gi|1022941;gi|1022931;gi|1022925;gi|54888474;gi|1022953;gi|59799932;gi|59799936;gi|119662879;gi|119662995;gi|54888564	4;4;4;4;4;4;4;4;4;4;4;3;3;2;2;2;2;2;1;1	1;1;1;1;1;1;1;1;1;1;1;1;1;1;1;1;1;1;1;1	0;0;0;0;0;0;0;0;0;0;0;0;0;0;0;0;0;0;0;0	>gi|1699400|gb|AAB37510.1| IgM VH2 chain, partial [Sus scrofa];>gi|54888562|emb|CAH68516.1| immunoglobulin heavy chain variable region, partial [Sus scrofa];>gi|54888516|emb|CAH68493.1| immunoglobulin heavy chain variable region, partial [Sus scrofa];>gi|5	20	4	1	0	66.4	16.8	0	13.025	119	119;122;122;122;123;123;129;135;144;146;147;126;146;117;119;119;121;124;100;102	0	24.889	584130	116830	584130	1	1				26	752;879;1473;1535	True;False;False;False	787;918;1532;1600	2681;3182;3183;3184;5004;5005;5006;5007;5200;5201;5202;5203;5204;5205;5206;5207;5208;5209;5210;5211;5212;5213;5214;5215;5216;5217;5218;5219;5220;5221;5222;5223;5224;5225;5226;5227;5228;5229;5230;5231;5232;5233;5234;5235;5236;5237;5238;5239;5240;5241;5242;5243;5244;5245;5246;5247;5248;5249;5250;5251;5252;5253;5254;5255;5256;5257;5258;5259;5260;5261;5262;5263;5264;5265;5266;5267;5268;5269;5270;5271…	4298;5067;5068;5069;8023;8024;8025;8026;8027;8298;8299;8300;8301;8302;8303;8304;8305;8306;8307;8308;8309;8310;8311;8312;8313;8314;8315;8316;8317;8318;8319;8320;8321;8322;8323;8324;8325;8326;8327;8328;8329;8330;8331;8332;8333;8334;8335;8336;8337;8338;8339;8340;8341;8342;8343;8344;8345;8346;8347;8348;8349;8350;8351;8352;8353;8354;8355;8356;8357;8358;8359;8360;8361;8362;8363;8364;8365;8366;8367;8368…	4298;5067;8025;8300
gi|41323593;gi|41323525	gi|41323593;gi|41323525	3;3	1;1	0;0	>gi|41323593|gb|AAR99954.1| immunoglobulin kappa variable region, partial [Sus scrofa];>gi|41323525|gb|AAR99920.1| immunoglobulin kappa variable region, partial [Sus scrofa]	2	3	1	0	37.9	19.7	0	14.269	132	132;132	0	8.4311	581510	116300	581510	1	1				298	750;2040;2301	False;False;True	785;2133;2402	2673;2674;2675;2676;2677;2678;2679;6858;6859;6860;6861;6862;7891	4277;4278;4279;4280;4281;4282;4283;4284;4285;4286;4287;4288;4289;4290;4291;4292;4293;4294;4295;10806;10807;10808;10809;10810;10811;10812;10813;10814;10815;10816;10817;10818;12582	4287;10814;12582
gi|340007404;gi|545842030	gi|340007404	10;4	10;4	2;1	>gi|340007404|ref|NP_001229990.1| alpha-actinin-1 [Sus scrofa]	2	10	10	2	12.6	12.6	2.4	102.6	887	887;370	0	77.835	6157300	116170	12160000	16	16				233	178;360;969;1028;1036;1218;1279;1427;1836;2357	True;True;True;True;True;True;True;True;True;True	185;373;1013;1076;1084;1269;1332;1483;1923;2460	736;1424;3421;3422;3423;3646;3647;3678;4172;4368;4369;4880;6231;8069;8070;8071	1203;2258;5429;5430;5431;5814;5815;5867;6667;7001;7002;7830;9824;12845;12846;12847	1203;2258;5429;5814;5867;6667;7001;7830;9824;12847
gi|311273025;gi|545875545;gi|545875543;gi|545875534;gi|56407693	gi|311273025;gi|545875545;gi|545875543;gi|545875534	78;78;76;76;20	1;1;1;1;1	1;1;1;1;1	>gi|311273025|ref|XP_003133691.1| PREDICTED: fibronectin isoformX3 [Sus scrofa];>gi|545875545|ref|XP_005672231.1| PREDICTED: fibronectin isoform X13 [Sus scrofa];>gi|545875543|ref|XP_005672230.1| PREDICTED: fibronectin isoform X12 [Sus scrofa];>gi|54587553	5	78	1	1	55.3	1.8	1.8	239.72	2177	2177;2267;2268;2358;497	0	10.903	10532000	115730	13206000	3	3				204	239;240;368;371;414;468;486;504;544;607;612;634;640;681;695;754;755;781;794;812;813;821;830;890;901;1037;1044;1087;1088;1154;1173;1179;1190;1258;1356;1472;1624;1664;1700;1711;1739;1764;1829;1862;1863;2037;2050;2061;2081;2093;2116;2120;2128;2129;2136;2138;2146;2198;2249;2252;2295;2323;2329;2348;2425;2460;2466;2479;2496;2507;2508;2517;2528;2564;2569;2607;2612;2619	False;False;False;False;False;False;False;False;False;False;False;False;False;False;False;False;False;False;False;False;False;False;False;False;False;False;False;False;False;False;False;False;False;False;False;False;False;False;False;False;False;False;False;False;False;False;False;False;False;False;False;False;False;False;False;True;False;False;False;False;False;False;False;False;False;False;Fals…	246;247;381;384;432;491;509;529;569;570;635;640;663;669;711;712;726;789;790;817;830;849;850;858;867;929;943;1085;1092;1136;1137;1205;1224;1230;1241;1310;1410;1531;1699;1741;1781;1793;1823;1848;1916;1950;1951;2130;2143;2155;2175;2187;2210;2211;2216;2224;2225;2232;2234;2242;2296;2348;2351;2396;2424;2430;2451;2530;2567;2574;2575;2589;2606;2617;2618;2628;2639;2677;2682;2723;2728;2735	1051;1052;1053;1054;1055;1056;1057;1058;1059;1060;1061;1062;1436;1437;1438;1439;1443;1444;1445;1446;1447;1448;1584;1585;1586;1587;1782;1783;1784;1785;1844;1900;1901;1902;1903;1904;1905;2021;2022;2023;2024;2025;2026;2027;2028;2029;2030;2031;2032;2033;2202;2203;2204;2210;2211;2212;2213;2214;2266;2267;2268;2269;2270;2271;2287;2288;2289;2392;2393;2394;2395;2396;2397;2434;2435;2436;2685;2686;2687;2688…	1706;1707;1708;1709;1710;1711;1712;1713;1714;1715;1716;1717;1718;1719;1720;1721;1722;2282;2283;2284;2285;2286;2287;2288;2289;2290;2291;2292;2296;2297;2298;2299;2300;2301;2302;2303;2304;2305;2306;2510;2511;2512;2513;2514;2515;2851;2852;2853;2854;2855;2971;3051;3052;3053;3054;3055;3056;3057;3058;3059;3060;3061;3062;3063;3228;3229;3230;3231;3232;3233;3234;3235;3236;3237;3238;3239;3240;3241;3242;3243…	1708;1718;2283;2297;2514;2851;2971;3052;3233;3551;3561;3633;3666;3818;3879;4313;4316;4418;4468;4659;4666;4747;4915;5113;5201;5873;5930;6107;6112;6378;6477;6503;6564;6884;7287;8018;8897;9062;9190;9226;9358;9440;9773;9976;9982;10802;10909;11085;11259;11298;11408;11438;11455;11459;11488;11509;11542;11794;12045;12063;12551;12677;12694;12791;13213;13431;13468;13583;13803;13839;13845;13888;13927;14239;…	70;71;72;73;74	464;478;927;1549;1694
gi|545822477	gi|545822477	48	48	48	>gi|545822477|ref|XP_005663276.1| PREDICTED: spectrin alpha chain, erythrocytic 1 [Sus scrofa]	1	48	48	48	24.2	24.2	24.2	279.96	2408	2408	0	323.31	16183000	115590	43990000	67	67				347	8;15;34;118;182;356;397;402;428;448;505;548;617;704;741;749;768;936;947;977;981;983;985;1011;1023;1027;1178;1200;1219;1223;1297;1304;1368;1502;1590;1608;1745;1752;1802;1837;1870;1956;1983;2028;2075;2113;2390;2394	True;True;True;True;True;True;True;True;True;True;True;True;True;True;True;True;True;True;True;True;True;True;True;True;True;True;True;True;True;True;True;True;True;True;True;True;True;True;True;True;True;True;True;True;True;True;True;True	8;15;36;123;189;369;414;419;448;469;530;574;645;736;776;784;804;978;989;1021;1025;1027;1029;1056;1071;1075;1229;1251;1270;1274;1350;1357;1423;1562;1659;1680;1829;1836;1887;1924;1958;2048;2076;2121;2169;2207;2494;2498	17;52;135;375;746;1410;1411;1543;1544;1552;1640;1695;1906;2041;2042;2220;2458;2570;2571;2672;2734;3327;3361;3444;3448;3451;3453;3538;3632;3644;3645;4061;4125;4173;4177;4418;4432;4684;4685;5095;5096;5392;5443;5444;5930;5945;6107;6232;6360;6607;6694;6827;7075;7173;8148;8155	24;121;122;286;287;662;1213;2232;2233;2456;2457;2466;2609;2686;2687;3064;3065;3066;3067;3260;3261;3571;3925;4102;4103;4275;4276;4376;5291;5344;5345;5476;5480;5484;5486;5631;5632;5793;5812;5813;6502;6603;6668;6669;6676;7098;7099;7115;7538;7539;8138;8139;8604;8680;8681;9372;9390;9633;9634;9825;10015;10430;10572;10763;11226;11391;12954;12955;12964	24;122;286;662;1213;2232;2457;2466;2609;2686;3065;3260;3571;3925;4102;4275;4376;5291;5345;5476;5480;5484;5486;5631;5793;5812;6502;6603;6669;6676;7099;7115;7538;8139;8604;8680;9372;9390;9633;9825;10015;10430;10572;10763;11226;11391;12954;12964	141	872
gi|51592135;gi|164425;gi|116850;gi|545841138;gi|75070176;gi|68534976;gi|67937816;gi|67634029;gi|545841136;gi|171905897;gi|171905895	gi|51592135;gi|164425;gi|116850	3;3;3;1;1;1;1;1;1;1;1	3;3;3;1;1;1;1;1;1;1;1	3;3;3;1;1;1;1;1;1;1;1	>gi|51592135|ref|NP_001004043.1| cofilin-1 [Sus scrofa];>gi|164425|gb|AAA31020.1| cofilin [Sus scrofa];>gi|116850|sp|P10668.3|COF1_PIG RecName: Full=Cofilin-1; AltName: Full=Cofilin, non-muscle isoform	11	3	3	3	25.3	25.3	25.3	18.518	166	166;166;166;149;166;166;166;166;166;166;166	0	17.7	1145500	114550	3113800	3	3				52	1206;1343;2544	True;True;True	1257;1397;2655	4136;4137;4531;8818	6622;6623;7244;14144	6623;7244;14144
gi|545858751	gi|545858751	7	7	7	>gi|545858751|ref|XP_005668985.1| PREDICTED: collagen alpha-1(I) chain-like [Sus scrofa]	1	7	7	7	8.1	8.1	8.1	100	1032	1032	0	60.992	5706700	114130	15513000	18	18				373	808;810;906;1761;1933;1937;1993	True;True;True;True;True;True;True	845;847;948;1845;2024;2028;2086	2901;2904;2905;3265;3266;5969;5970;6563;6567;6719	4647;4648;4651;4652;5210;5211;5212;5213;5214;5215;5216;9429;9430;9431;9432;10368;10372;10620	4648;4652;5214;9431;10368;10372;10620
gi|2497785;gi|1066278;gi|311244403	gi|2497785;gi|1066278;gi|311244403	7;7;7	7;7;7	7;7;7	>gi|2497785|sp|Q29558.1|MAOX_PIG RecName: Full=NADP-dependent malic enzyme; Short=NADP-ME; AltName: Full=Malic enzyme 1;>gi|1066278|emb|CAA63599.1| malate dehydrogenase decarboxylase (NADP+), partial [Sus scrofa];>gi|311244403|ref|XP_001924368.2| PREDICTED	3	7	7	7	19	19	19	62.006	557	557;557;571	0	62.715	2941900	113150	7996800	9	9				31	492;845;910;1080;1438;2593;2610	True;True;True;True;True;True;True	517;884;952;1129;1496;2708;2726	1869;1870;3116;3272;3800;3801;3802;4908;4909;8956;9022	3010;3011;4978;5222;6091;6092;6093;7869;7870;14367;14457	3011;4978;5222;6091;7870;14367;14457
gi|86604373;gi|148233690	gi|86604373;gi|148233690	4;4	4;4	4;4	>gi|86604373|gb|ABD13966.1| complement component C9 [Sus scrofa];>gi|148233690|ref|NP_001090917.1| complement component C9 precursor [Sus scrofa]	2	4	4	4	9.9	9.9	9.9	62.225	543	543;543	0	35.472	2890300	111160	3620600	5	5				95	81;1241;1509;2118	True;True;True;True	84;1292;1573;2213	259;4225;5119;5120;7193	499;6772;8171;8172;11426	499;6772;8172;11426
gi|92020086	gi|92020086	1	1	1	>gi|92020086|dbj|BAE93248.1| type VI collagen alpha-1 chain, partial [Sus scrofa]	1	1	1	1	14.7	14.7	14.7	10.475	95	95	0.0028329	6.5658	769630	109950	2092100	1	1				412	2339	True	2440	7999	12724	12724
gi|545867751;gi|92020110;gi|92020103	gi|545867751;gi|92020110	8;4;2	8;4;2	8;4;2	>gi|545867751|ref|XP_005657250.1| PREDICTED: collagen alpha-2(VI) chain [Sus scrofa];>gi|92020110|dbj|BAE93251.1| type VI collagen alpha-2 chain, partial [Sus scrofa]	3	8	8	8	12.7	12.7	12.7	94.37	871	871;246;100	0	65.28	4414500	107670	10301000	10	10				377	1157;1323;1341;1656;1899;1988;2258;2595	True;True;True;True;True;True;True;True	1208;1377;1395;1733;1989;2081;2357;2710	4002;4003;4481;4525;4526;5692;6452;6707;6708;7617;8958	6407;6408;7176;7230;7231;9037;10189;10601;10602;12079;14369	6407;7176;7231;9037;10189;10602;12079;14369
gi|571385;gi|2136530	gi|571385;gi|2136530	2;2	1;1	1;1	>gi|571385|gb|AAA67015.1| Ig heavy chain variable VDJ region, partial [Sus scrofa];>gi|2136530|pir||I47190 Ig heavy chain variable VDJ region - pig (fragment)	2	2	1	1	21.8	10.6	10.6	15.58	142	142;142	0	27.555	750070	107150	1301700	2	2				151	391;1535	True;False	408;1600	1526;1527;5200;5201;5202;5203;5204;5205;5206;5207;5208;5209;5210;5211;5212;5213;5214;5215;5216;5217;5218;5219;5220;5221;5222;5223;5224;5225;5226;5227;5228;5229;5230;5231;5232;5233;5234;5235;5236;5237;5238;5239;5240;5241;5242;5243;5244;5245;5246;5247;5248;5249;5250;5251;5252;5253;5254;5255;5256;5257;5258;5259;5260;5261;5262;5263;5264;5265;5266;5267;5268;5269;5270;5271;5272;5273;5274;5275	2433;2434;8298;8299;8300;8301;8302;8303;8304;8305;8306;8307;8308;8309;8310;8311;8312;8313;8314;8315;8316;8317;8318;8319;8320;8321;8322;8323;8324;8325;8326;8327;8328;8329;8330;8331;8332;8333;8334;8335;8336;8337;8338;8339;8340;8341;8342;8343;8344;8345;8346;8347;8348;8349;8350;8351;8352;8353;8354;8355;8356;8357;8358;8359;8360;8361;8362;8363;8364;8365;8366;8367;8368;8369;8370;8371;8372;8373;8374;8375…	2434;8300
gi|350582219	gi|350582219	1	1	1	>gi|350582219|ref|XP_003354804.2| PREDICTED: GC-rich sequence DNA-binding factor 2-like [Sus scrofa]	1	1	1	1	2.3	2.3	2.3	45.713	395	395	0.0052219	6.0773	2337000	106230	6352700	2	2				265	1790	True	1875	6065;6066	9579;9580	9579	111	137
gi|359811347;gi|358009189;gi|54873401	gi|359811347;gi|358009189;gi|54873401	2;2;1	2;2;1	2;2;1	>gi|359811347|ref|NP_001241645.1| 60 kDa heat shock protein, mitochondrial [Sus scrofa];>gi|358009189|gb|AET99216.1| mitochondrial heat shock 60 kDa protein 1 [Sus scrofa];>gi|54873401|gb|AAV40980.1| heat shock 60 kDa protein 1, partial [Sus scrofa]	3	2	2	2	5.2	5.2	5.2	60.867	573	573;573;116	0	15.165	3451600	104590	4016200	3	3				286	117;1496	True;True	122;1556	373;374;5062;5063	660;661;8091;8092	660;8092
gi|9955853;gi|545843039;gi|47523270;gi|9968805	gi|9955853;gi|545843039;gi|47523270;gi|9968805	7;7;7;4	6;6;6;4	6;6;6;4	>gi|9955853|emb|CAC05490.1| alpha-1-antichymotrypsin 2 [Sus scrofa];>gi|545843039|ref|XP_005666480.1| PREDICTED: alpha-1-antichymotrypsin 2 isoform X1 [Sus scrofa];>gi|47523270|ref|NP_998952.1| alpha-1-antichymotrypsin 2 precursor [Sus scrofa];>gi|9968805|	4	7	6	6	21.7	18.8	18.8	46.644	415	415;415;415;225	0	54.151	2358300	102530	5511800	7	7				329	345;735;759;918;1353;2488;2515	True;True;True;False;True;True;True	358;770;794;960;1407;2598;2626	1391;2556;2701;3285;3286;3287;3288;4552;8541;8659;8660	2212;4083;4332;5241;5242;5243;5244;5245;5246;5247;5248;7279;13665;13882;13883	2212;4083;4332;5245;7279;13665;13883
gi|346421347;gi|545844673;gi|311262067;gi|545844665;gi|545844662;gi|545844659	gi|346421347	3;1;1;1;1;1	3;1;1;1;1;1	3;1;1;1;1;1	>gi|346421347|ref|NP_001231022.1| glucosamine-6-phosphate isomerase 1 [Sus scrofa]	6	3	3	3	15.6	15.6	15.6	32.574	289	289;276;276;311;334;335	0	24.049	1495400	99696	4065000	3	3				244	1371;2161;2571	True;True;True	1426;2257;2684	4691;7322;8890	7547;11635;14271	7547;11635;14271
CON__Q29443;CON__Q0IIK2	CON__Q29443;CON__Q0IIK2	4;4	1;1	1;1	>Q29443 SWISS-PROT:Q29443 Serotransferrin - Bos taurus (Bovine).;>Q0IIK2 TREMBL:Q0IIK2 (Bos taurus) Transferrin	2	4	1	1	7.3	2.6	2.6	75.829	685	685;704	0	18.553	4166500	99202	11326000	5	5			+	16	384;798;970;2634	False;True;False;False	398;835;1014;2752	1482;1483;1484;1485;2806;2807;2808;3424;9120	2354;2355;2356;2357;2358;2359;2360;2361;4488;4489;4490;4491;4492;5432;14644	2359;4488;5432;14644
gi|350590718	gi|350590718	4	4	4	>gi|350590718|ref|XP_003131850.3| PREDICTED: bleomycin hydrolase [Sus scrofa]	1	4	4	4	20.9	20.9	20.9	30.763	268	268	0	26.564	1558900	97434	4237600	5	5				272	1051;1351;2184;2318	True;True;True;True	1100;1405;2280;2419	3729;4548;7376;7949;7950	5976;7275;11713;12665;12666	5976;7275;11713;12665
gi|456752987;gi|311249255	gi|456752987;gi|311249255	1;1	1;1	1;1	>gi|456752987|gb|JAA74072.1| glycosyltransferase 25 domain containing 1 [Sus scrofa];>gi|311249255|ref|XP_003123541.1| PREDICTED: procollagen galactosyltransferase 1 [Sus scrofa]	2	1	1	1	1.3	1.3	1.3	71.747	623	623;623	0.002681	6.2344	3111200	97225	5176900	6	6				187	2393	True	2497	8151;8152;8153;8154	12958;12959;12960;12961;12962;12963	12959
gi|545837877;gi|545823309;gi|350583436;gi|350583430;gi|350583421;gi|343887370;gi|335310903;gi|335291890;gi|335291884;gi|335287018;gi|311259875;gi|194039822;gi|194039814;gi|335287031;gi|545837902;gi|545823288	gi|545837877;gi|545823309;gi|350583436;gi|350583430;gi|350583421;gi|343887370;gi|335310903;gi|335291890;gi|335291884;gi|335287018;gi|311259875;gi|194039822;gi|194039814;gi|335287031;gi|545837902;gi|545823288	1;1;1;1;1;1;1;1;1;1;1;1;1;1;1;1	1;1;1;1;1;1;1;1;1;1;1;1;1;1;1;1	1;1;1;1;1;1;1;1;1;1;1;1;1;1;1;1	>gi|545837877|ref|XP_005665716.1| PREDICTED: histone H2B type 1-H-like [Sus scrofa];>gi|545823309|ref|XP_005663573.1| PREDICTED: histone H2B type 2-E-like [Sus scrofa];>gi|350583436|ref|XP_003481518.1| PREDICTED: histone H2B type 2-E-like [Sus scrofa];>gi|	16	1	1	1	11.9	11.9	11.9	13.892	126	126;126;126;126;126;126;126;126;126;126;126;126;126;131;134;240	0	7.057	678860	96980	1427500	2	2				135	132	True	137	412;413	701;702	702
gi|83921637;gi|73745270;gi|111228215;gi|86560765	gi|83921637;gi|73745270;gi|111228215	10;10;10;2	10;10;10;2	10;10;10;2	>gi|83921637|ref|NP_001033093.1| matrix metalloproteinase-9 precursor [Sus scrofa];>gi|73745270|gb|AAZ81948.1| matrix metalloproteinase 9 [Sus scrofa];>gi|111228215|gb|ABH09084.1| matrix metallopeptidase 9 [Sus scrofa]	4	10	10	10	15.7	15.7	15.7	79.109	708	708;708;708;54	0	62.655	3537100	95598	9614900	8	8				37	530;775;1349;1507;1552;1755;2078;2079;2395;2506	True;True;True;True;True;True;True;True;True;True	555;811;1403;1568;1617;1839;2172;2173;2499;2616	1973;2746;4546;5108;5306;5956;7083;7084;8156;8629	3162;4388;7273;8156;8483;9409;11236;11237;12965;13834	3162;4388;7273;8156;8483;9409;11236;11237;12965;13834
gi|346716324;gi|311259003;gi|264748;gi|347300174;gi|205371778;gi|94962173;gi|346716320;gi|45269023	gi|346716324;gi|311259003;gi|264748;gi|347300174;gi|205371778;gi|94962173;gi|346716320	3;3;2;2;2;2;2;1	3;3;2;2;2;2;2;1	3;3;2;2;2;2;2;1	>gi|346716324|ref|NP_001231180.1| myosin regulatory light chain 2 protein isoform 2 [Sus scrofa];>gi|311259003|ref|XP_003127889.1| PREDICTED: myosin regulatory light chain 12B isoform 1 [Sus scrofa];>gi|264748|gb|AAB25216.1| myosin regulatory light chain,	8	3	3	3	22.1	22.1	22.1	19.865	172	172;172;171;172;172;173;179;132	0	22.741	824640	91626	824640	3	3				192	329;463;899	True;True;True	342;486;940	1355;1769;3253	2167;2828;5196	2167;2828;5196
gi|194034199;gi|194034201	gi|194034199;gi|194034201	3;3	3;3	3;3	>gi|194034199|ref|XP_001928042.1| PREDICTED: proteasome subunit alpha type-3 isoform 2 [Sus scrofa];>gi|194034201|ref|XP_001928025.1| PREDICTED: proteasome subunit alpha type-3 isoform 1 [Sus scrofa]	2	3	3	3	12.9	12.9	12.9	27.647	248	248;255	0	22.506	1096500	91376	1262200	4	4				132	204;1114;2003	True;True;True	211;1163;2096	817;3870;3871;6752	1334;6206;6207;10664	1334;6206;10664
gi|178056753;gi|167834153;gi|545802376;gi|545802374;gi|545802372;gi|545802370;gi|335310649	gi|178056753;gi|167834153;gi|545802376;gi|545802374;gi|545802372;gi|545802370	11;11;10;10;10;10;3	8;8;7;7;7;7;0	8;8;7;7;7;7;0	>gi|178056753|ref|NP_001116644.1| glycogen phosphorylase, liver form [Sus scrofa];>gi|167834153|gb|ACA02827.1| glycogen storage disease type VI-related protein [Sus scrofa];>gi|545802376|ref|XP_005660004.1| PREDICTED: glycogen phosphorylase, liver form iso	7	11	8	8	16.5	11.6	11.6	97.504	854	854;854;755;755;755;755;725	0	59.778	4582500	89852	10145000	10	10				118	216;349;375;854;1102;1159;1264;1360;2370;2377;2407	True;True;True;True;True;True;False;True;False;True;False	223;362;388;893;1151;1210;1316;1414;2473;2480;2512	989;1398;1459;1460;3133;3836;4007;4326;4327;4566;4567;8100;8110;8222	1611;2219;2326;2327;5001;6133;6413;6910;6911;7298;7299;12888;12899;13094	1611;2219;2326;5001;6133;6413;6911;7298;12888;12899;13094
gi|335281597	gi|335281597	4	4	4	>gi|335281597|ref|XP_003122642.2| PREDICTED: fermitin family homolog 3 [Sus scrofa]	1	4	4	4	6	6	6	75.557	663	663	0	23.751	3019200	86262	6806100	7	7				215	255;1528;2485;2636	True;True;True;True	265;1592;2595;2754	1108;5176;8528;8529;8530;8531;9124	1787;8261;13648;13649;13650;13651;13652;14648	1787;8261;13648;14648
gi|545876157;gi|545876154;gi|545876151;gi|545876148;gi|545876145;gi|545876142;gi|545876139;gi|545876136;gi|545876133;gi|545876130;gi|545876168;gi|409153871;gi|545876165;gi|545889485;gi|350594057;gi|545876160	gi|545876157;gi|545876154;gi|545876151;gi|545876148;gi|545876145;gi|545876142;gi|545876139;gi|545876136;gi|545876133;gi|545876130	7;7;7;7;7;7;7;7;7;7;1;1;1;1;1;1	7;7;7;7;7;7;7;7;7;7;1;1;1;1;1;1	7;7;7;7;7;7;7;7;7;7;1;1;1;1;1;1	>gi|545876157|ref|XP_005672377.1| PREDICTED: leucine-rich repeat flightless-interacting protein 2 isoform X11 [Sus scrofa];>gi|545876154|ref|XP_005672376.1| PREDICTED: leucine-rich repeat flightless-interacting protein 2 isoform X10 [Sus scrofa];>gi|545876	16	7	7	7	12.2	12.2	12.2	86.004	814	814;831;846;859;870;876;900;908;930;1057;393;393;509;527;629;651	0	58.293	2757000	86156	5653200	17	17				384	442;459;465;506;776;1747;2010	True;True;True;True;True;True;True	463;482;488;531;812;1831;2103	1680;1762;1763;1772;1773;1774;1907;2747;2748;2749;2750;5933;6770;6771;6772	2665;2820;2821;2831;2832;2833;3068;4389;4390;4391;4392;4393;4394;9376;10687;10688;10689	2665;2821;2832;3068;4390;9376;10689
gi|75063982;gi|545848507;gi|545848505;gi|169882027	gi|75063982;gi|545848507;gi|545848505;gi|169882027	2;2;2;2	1;1;1;1	1;1;1;1	>gi|75063982|sp|Q7M2W6.1|CRYAB_PIG RecName: Full=Alpha-crystallin B chain; AltName: Full=Alpha(B)-crystallin;>gi|545848507|ref|XP_005667377.1| PREDICTED: alpha-crystallin B chain isoform X2 [Sus scrofa];>gi|545848505|ref|XP_005667376.1| PREDICTED: alpha-cr	4	2	1	1	11.4	6.3	6.3	20.129	175	175;175;175;175	0.0028249	6.5528	840660	84066	2285200	2	2				120	1566;1736	True;False	1632;1820	5337;5338;5906;5907;5908	8525;8526;9332;9333;9334;9335	8526;9335
gi|283464611;gi|5805339;gi|47522830;gi|14582552;gi|10197477	gi|283464611;gi|5805339;gi|47522830;gi|14582552	5;5;5;5;2	5;5;5;5;2	5;5;5;5;2	>gi|283464611|gb|ADB22832.1| integrin beta 3, partial [Sus scrofa];>gi|5805339|gb|AAD51953.1|AF170527_1 glycoprotein IIIa [Sus scrofa];>gi|47522830|ref|NP_999167.1| integrin beta-3 precursor [Sus scrofa];>gi|14582552|gb|AAK69529.1|AF282890_1 glycoprotein G	5	5	5	5	8.3	8.3	8.3	84.22	762	762;784;784;784;134	0	36.512	3088000	79180	7231300	9	9				92	269;304;932;1038;1623	True;True;True;True;True	280;315;974;1086;1698	1145;1229;3319;3320;3321;3689;5585;5586;5587	1847;1990;5281;5282;5283;5894;8891;8892;8893	1847;1990;5281;5894;8891
gi|545870539;gi|47522618;gi|17979613;gi|545870537;gi|50403675;gi|2283	gi|545870539;gi|47522618;gi|17979613;gi|545870537;gi|50403675	16;16;16;16;16;1	16;16;16;16;16;1	16;16;16;16;16;1	>gi|545870539|ref|XP_005671131.1| PREDICTED: vinculin isoform X2 [Sus scrofa];>gi|47522618|ref|NP_999099.1| vinculin [Sus scrofa];>gi|17979613|gb|AAL50327.1| vinculin [Sus scrofa];>gi|545870537|ref|XP_005671130.1| PREDICTED: vinculin isoform X1 [Sus scrofa	6	16	16	16	19.7	19.7	19.7	116.75	1066	1066;1067;1067;1134;1135;224	0	99.585	5788400	78222	11698000	32	32				126	9;87;167;201;395;556;566;893;1228;1561;1599;1798;1974;2145;2293;2399	True;True;True;True;True;True;True;True;True;True;True;True;True;True;True;True	9;90;174;208;412;582;594;932;1279;1627;1670;1883;2066;2241;2394;2503	18;274;275;276;277;278;713;810;811;1537;1538;1539;2052;2053;2054;2075;2076;3225;4187;5330;5426;5427;6094;6095;6096;6097;6098;6666;7266;7861;8194	25;519;520;521;522;523;1174;1327;1328;2450;2451;2452;3271;3272;3273;3298;3299;5141;6686;8517;8654;8655;9617;9618;9619;9620;9621;9622;9623;10530;11541;12524;13047	25;520;1174;1327;2450;3273;3299;5141;6686;8517;8655;9622;10530;11541;12524;13047
gi|462383;gi|24987656;gi|24987482;gi|39654457;gi|159162733;gi|159162732;gi|431436;gi|194018690;gi|1730504;gi|887647;gi|887645;gi|887643;gi|743651;gi|603040;gi|603038;gi|603036;gi|545862104;gi|178056514;gi|178056510;gi|1730507;gi|1730506;gi|1730505;gi|1730503;gi|468912;gi|194018712;gi|1709080;gi|457348;gi|194097491;gi|1709081;gi|703245;gi|1709082;gi|1095881;gi|47523954;gi|435101;gi|1709757;gi|1165…	gi|462383;gi|24987656;gi|24987482;gi|39654457;gi|159162733;gi|159162732;gi|431436;gi|194018690;gi|1730504;gi|887647;gi|887645;gi|887643;gi|743651;gi|603040;gi|603038;gi|603036;gi|545862104;gi|178056514;gi|178056510;gi|1730507;gi|1730506;gi|1730505;gi|1730503;gi|468912;gi|194018712;gi|1709080;gi|457348;gi|194097491;gi|1709081;gi|703245;gi|1709082;gi|1095881;gi|47523954;gi|435101;gi|1709757;gi|1165…	1;1;1;1;1;1;1;1;1;1;1;1;1;1;1;1;1;1;1;1;1;1;1;1;1;1;1;1;1;1;1;1;1;1;1;1;1;1;1;1;1;1;1	1;1;1;1;1;1;1;1;1;1;1;1;1;1;1;1;1;1;1;1;1;1;1;1;1;1;1;1;1;1;1;1;1;1;1;1;1;1;1;1;1;1;1	1;1;1;1;1;1;1;1;1;1;1;1;1;1;1;1;1;1;1;1;1;1;1;1;1;1;1;1;1;1;1;1;1;1;1;1;1;1;1;1;1;1;1	>gi|462383|sp|P15175.2|ICTL_PIG RecName: Full=Cathelin;>gi|24987656|pdb|1LXE|A Chain A, Crystal Structure Of The Cathelicidin Motif Of Protegrins;>gi|24987482|pdb|1KWI|A Chain A, Crystal Structure Analysis Of The Cathelicidin Motif Of Protegrins;>gi|396544	43	1	1	1	12.5	12.5	12.5	10.85	96	96;101;101;105;105;105;147;147;147;149;149;149;149;149;149;149;149;149;149;149;149;149;149;153;153;153;166;166;166;167;167;167;172;172;172;172;172;212;212;228;228;228;228	0	21.608	467010	77835	467010	1	1				24	1434	True	1492	4902	7863	7863
gi|545895084	gi|545895084	1	1	1	>gi|545895084|ref|XP_005659083.1| PREDICTED: nuclear receptor 2C2-associated protein [Sus scrofa]	1	1	1	1	6.3	6.3	6.3	17.856	159	159	0.0028653	6.7157	616550	77069	616550	1	1				395	1580	True	1648	5368	8569	8569
gi|229621;gi|473571;gi|403242449;gi|403242448;gi|350297743;gi|350297742;gi|1170740;gi|545808282;gi|291220024;gi|288860136;gi|268633767	gi|229621;gi|473571;gi|403242449;gi|403242448;gi|350297743;gi|350297742;gi|1170740;gi|545808282;gi|291220024;gi|288860136;gi|268633767	3;3;3;3;3;3;3;3;2;2;2	3;3;3;3;3;3;3;3;2;2;2	3;3;3;3;3;3;3;3;2;2;2	>gi|229621|prf||770227B dehydrogenase M4,lactate;>gi|473571|gb|AAA50436.1| lactate dehydrogenase-A [Sus scrofa domesticus];>gi|403242449|pdb|9LDB|B Chain B, Design And Synthesis Of New Enzymes Based On The Lactate Dehydrogenase Framework;>gi|403242448|pdb|	11	3	3	3	12.1	12.1	12.1	36.487	331	331;332;332;332;332;332;332;361;155;332;332	0	21.838	1359500	75526	3695400	5	5				55	401;803;1424	True;True;True	418;840;1480	1551;2885;4868;4869;4870	2465;4618;7805;7806;7807	2465;4618;7806
gi|5805337;gi|47522822;gi|334192420	gi|5805337;gi|47522822;gi|334192420	8;8;8	8;8;8	8;8;8	>gi|5805337|gb|AAD51952.1|AF170526_1 glycoprotein IIb [Sus scrofa];>gi|47522822|ref|NP_999163.1| integrin alpha-IIb precursor [Sus scrofa];>gi|334192420|gb|AEG67285.1| integrin alpha IIb [Sus scrofa]	3	8	8	8	11	11	11	113.58	1036	1036;1036;1036	0	51.758	3186600	74107	7583400	16	16				212	38;148;164;392;1653;1715;2486;2500	True;True;True;True;True;True;True;True	40;155;171;409;1730;1797;2596;2610	142;143;144;664;706;707;1528;5682;5683;5684;5843;5844;5845;8532;8614	296;297;298;1115;1167;1168;2435;9026;9027;9028;9029;9245;9246;9247;13653;13814	296;1115;1168;2435;9026;9247;13653;13814
gi|545841856;gi|417515928	gi|545841856	33;1	33;1	33;1	>gi|545841856|ref|XP_005666372.1| PREDICTED: spectrin beta chain, erythrocytic [Sus scrofa]	2	33	33	33	18.2	18.2	18.2	269.92	2340	2340;2315	0	257.99	9705600	72430	26382000	39	39				362	168;320;323;330;374;434;478;551;615;646;696;1002;1009;1220;1345;1417;1421;1453;1463;1595;1733;1765;1850;2049;2172;2290;2305;2345;2361;2363;2369;2372;2573	True;True;True;True;True;True;True;True;True;True;True;True;True;True;True;True;True;True;True;True;True;True;True;True;True;True;True;True;True;True;True;True;True	175;333;336;343;387;454;501;577;643;675;727;1047;1054;1271;1399;1473;1477;1511;1522;1666;1817;1849;1937;2142;2268;2391;2406;2448;2464;2466;2472;2475;2686	714;1281;1287;1356;1458;1654;1819;2045;2217;2301;2437;3514;3535;4174;4542;4851;4865;4938;4970;5415;5900;5979;6276;6896;7342;7858;7899;8026;8079;8083;8084;8099;8105;8895	1175;2062;2063;2076;2168;2323;2324;2325;2625;2626;2924;3264;3568;3681;3882;3883;5579;5628;6670;7269;7786;7802;7910;7911;7953;8640;9326;9441;9890;10906;11664;12521;12590;12782;12855;12870;12871;12887;12893;12894;14278	1175;2062;2076;2168;2324;2625;2924;3264;3568;3681;3883;5579;5628;6670;7269;7786;7802;7910;7953;8640;9326;9441;9890;10906;11664;12521;12590;12782;12855;12871;12887;12893;14278
gi|6016267;gi|47522774;gi|1945447;gi|10304374	gi|6016267;gi|47522774;gi|1945447	5;5;5;1	5;5;5;1	3;3;3;0	>gi|6016267|sp|O02705.3|HS90A_PIG RecName: Full=Heat shock protein HSP 90-alpha;>gi|47522774|ref|NP_999138.1| heat shock protein HSP 90-alpha [Sus scrofa];>gi|1945447|gb|AAC48718.1| 90-kDa heat shock protein [Sus scrofa]	4	5	5	3	8.6	8.6	5	84.774	733	733;733;733;94	0	33.211	2458800	72317	3982500	3	3				139	28;114;965;1004;1682	True;True;True;True;True	29;118;1008;1049;1761	119;355;3412;3521;5747	268;639;5415;5608;9112	268;639;5415;5608;9112
gi|753704222	gi|753704222	1	1	1	>gi|753704222|gb|JAG69655.1| CD37 molecule [Sus scrofa domesticus]	1	1	1	1	7.1	7.1	7.1	31.772	281	281	0	10.757	572120	71514	1555200	1	1				408	2364	True	2467	8085	12872	12872
gi|545878901	gi|545878901	23	23	23	>gi|545878901|ref|XP_005672725.1| PREDICTED: ankyrin-1 [Sus scrofa]	1	23	23	23	17.3	17.3	17.3	214.55	1960	1960	0	150.21	6647300	69971	18069000	28	28				388	291;523;991;1094;1112;1135;1299;1357;1358;1544;1567;1794;1903;1925;1944;2085;2086;2133;2153;2256;2317;2368;2613	True;True;True;True;True;True;True;True;True;True;True;True;True;True;True;True;True;True;True;True;True;True;True	302;548;1035;1143;1161;1186;1352;1411;1412;1609;1633;1879;1993;2016;2035;2179;2180;2229;2249;2355;2418;2471;2729	1207;1963;3473;3824;3864;3865;3948;4421;4562;4563;5294;5339;6084;6474;6541;6579;7102;7103;7226;7287;7614;7948;8098;9030	1949;3152;5521;6121;6192;6193;6319;7102;7103;7293;7294;8470;8471;8527;9607;10232;10324;10388;11276;11277;11278;11469;11567;12071;12072;12664;12886;14477	1949;3152;5521;6121;6193;6319;7102;7293;7294;8471;8527;9607;10232;10324;10388;11276;11278;11469;11567;12071;12664;12886;14477
gi|311260572	gi|311260572	2	2	2	>gi|311260572|ref|XP_003128488.1| PREDICTED: ammonium transporter Rh type A [Sus scrofa]	1	2	2	2	4.8	4.8	4.8	47.075	433	433	0	14.646	830710	69226	2258100	3	3				194	1846;1955	True;True	1933;2047	6261;6606	9861;9862;10429	9861;10429
gi|47522798;gi|24397195	gi|47522798;gi|24397195	5;5	5;5	5;5	>gi|47522798|ref|NP_999151.1| Myocilin precursor [Sus scrofa];>gi|24397195|gb|AAN59763.1|AF350447_1 myocilin [Sus scrofa]	2	5	5	5	8.6	8.6	8.6	55.032	489	489;489	0	38.382	1768300	63154	4302000	11	11				170	594;597;1513;1776;1852	True;True;True;True;True	622;625;1577;1861;1939	2162;2163;2178;5126;6025;6026;6278;6279	3444;3445;3446;3447;3448;3496;8179;9520;9521;9892;9893	3448;3496;8179;9521;9892
gi|545811702;gi|545811700;gi|51592102;gi|2010;gi|130311	gi|545811702;gi|545811700;gi|51592102;gi|2010;gi|130311	2;2;2;2;2	2;2;2;2;2	2;2;2;2;2	>gi|545811702|ref|XP_005661596.1| PREDICTED: hyaluronan and proteoglycan link protein 1 isoform X2 [Sus scrofa];>gi|545811700|ref|XP_005661595.1| PREDICTED: hyaluronan and proteoglycan link protein 1 isoform X1 [Sus scrofa];>gi|51592102|ref|NP_001004028.1|	5	2	2	2	6.2	6.2	6.2	40.177	354	354;354;354;354;354	0	10.696	1419400	61715	1909400	2	2				87	578;1422	True;True	606;1478	2101;4866	3329;7803	3329;7803
gi|545873442	gi|545873442	1	1	1	>gi|545873442|ref|XP_005671695.1| PREDICTED: translin-like [Sus scrofa]	1	1	1	1	11.6	11.6	11.6	19.868	172	172	0	7.3113	617060	61706	1677300	1	1				380	543	True	568	2020	3227	3227
gi|753703856;gi|545882676;gi|545882673;gi|311275459;gi|545882668;gi|311275457;gi|545882663	gi|753703856	20;2;2;2;2;2;2	20;2;2;2;2;2;2	20;2;2;2;2;2;2	>gi|753703856|gb|JAG69539.1| filamin A, alpha [Sus scrofa domesticus]	7	20	20	20	10.3	10.3	10.3	279.88	2639	2639;2604;2628;2693;2714;2720;2741	0	131.91	8009000	61607	20247000	38	38				406	37;53;69;73;214;469;527;616;950;1059;1181;1212;1366;2262;2267;2355;2360;2419;2433;2439	True;True;True;True;True;True;True;True;True;True;True;True;True;True;True;True;True;True;True;True	39;56;72;76;221;492;552;644;992;1108;1232;1263;1421;2361;2366;2458;2463;2524;2539;2545	141;181;227;228;239;986;987;1786;1969;2218;2219;3364;3365;3366;3748;4068;4148;4634;4635;4636;4637;7621;7645;8062;8075;8076;8077;8078;8255;8256;8296;8297;8298;8316	295;351;450;451;465;1608;1609;2856;3158;3569;3570;5350;5351;5352;5996;6513;6634;7432;7433;7434;7435;7436;12083;12127;12837;12851;12852;12853;12854;13182;13183;13184;13185;13186;13250;13251;13252;13284	295;351;451;465;1609;2856;3158;3570;5352;5996;6513;6634;7434;12083;12127;12837;12853;13185;13252;13284
gi|194038973;gi|545841461	gi|194038973;gi|545841461	4;4	4;4	4;4	>gi|194038973|ref|XP_001929258.1| PREDICTED: purine nucleoside phosphorylase isoform X1 [Sus scrofa];>gi|545841461|ref|XP_005656368.1| PREDICTED: purine nucleoside phosphorylase isoform X2 [Sus scrofa]	2	4	4	4	21.9	21.9	21.9	32.042	288	288;296	0	30.612	1100300	61125	2990800	4	4				134	336;673;1319;2337	True;True;True;True	349;702;1373;2438	1370;2363;4464;7995	2187;3777;7152;12719	2187;3777;7152;12719
gi|343791025	gi|343791025	3	3	3	>gi|343791025|ref|NP_001230558.1| lysosomal protective protein precursor [Sus scrofa]	1	3	3	3	8.9	8.9	8.9	55.664	495	495	0	25.86	1157500	60919	3146300	3	3				237	425;513;1866	True;True;True	444;538;1954	1623;1921;6339	2587;3084;9992	2587;3084;9992
gi|558853;gi|2136519	gi|558853;gi|2136519	2;2	1;1	1;1	>gi|558853|gb|AAA67004.1| Ig heavy chain variable VDJ region, partial [Sus scrofa];>gi|2136519|pir||I47179 Ig heavy chain variable VDJ region - pig (fragment)	2	2	1	1	21.3	9.9	9.9	15.488	141	141;141	0.0028986	6.8002	364840	60807	991740	1	1				148	1484;1535	True;False	1543;1600	5037;5200;5201;5202;5203;5204;5205;5206;5207;5208;5209;5210;5211;5212;5213;5214;5215;5216;5217;5218;5219;5220;5221;5222;5223;5224;5225;5226;5227;5228;5229;5230;5231;5232;5233;5234;5235;5236;5237;5238;5239;5240;5241;5242;5243;5244;5245;5246;5247;5248;5249;5250;5251;5252;5253;5254;5255;5256;5257;5258;5259;5260;5261;5262;5263;5264;5265;5266;5267;5268;5269;5270;5271;5272;5273;5274;5275	8061;8298;8299;8300;8301;8302;8303;8304;8305;8306;8307;8308;8309;8310;8311;8312;8313;8314;8315;8316;8317;8318;8319;8320;8321;8322;8323;8324;8325;8326;8327;8328;8329;8330;8331;8332;8333;8334;8335;8336;8337;8338;8339;8340;8341;8342;8343;8344;8345;8346;8347;8348;8349;8350;8351;8352;8353;8354;8355;8356;8357;8358;8359;8360;8361;8362;8363;8364;8365;8366;8367;8368;8369;8370;8371;8372;8373;8374;8375;8376…	8061;8300
gi|335290056;gi|545832336	gi|335290056;gi|545832336	3;3	3;3	3;3	>gi|335290056|ref|XP_003356058.1| PREDICTED: C-type lectin domain family 11 member A isoform X1 [Sus scrofa];>gi|545832336|ref|XP_005664849.1| PREDICTED: C-type lectin domain family 11 member A isoform X2 [Sus scrofa]	2	3	3	3	11.1	11.1	11.1	36.027	325	325;357	0	19.009	1092800	60709	1604500	5	5				220	318;789;829	True;True;True	331;825;866	1273;2778;2779;2780;3070	2052;4439;4440;4441;4913	2052;4439;4913
gi|441477620	gi|441477620	12	2	0	>gi|441477620|dbj|BAM75565.1| IgG heavy chain precursor [Sus scrofa]	1	12	2	0	42.6	6.2	0	51.513	469	469	0	17.54	1265400	60257	3439700	2	2				321	389;426;529;581;665;2005;2080;2094;2156;2233;2417;2493	False;False;False;False;True;True;False;False;False;False;False;False	405;406;445;554;609;694;2098;2174;2188;2252;2332;2522;2603	1507;1508;1509;1510;1511;1512;1513;1514;1515;1516;1517;1518;1519;1520;1624;1625;1626;1627;1628;1629;1630;1631;1632;1633;1971;1972;2112;2113;2114;2115;2340;6756;7085;7086;7087;7088;7089;7090;7091;7092;7117;7118;7119;7301;7302;7303;7304;7305;7306;7307;7308;7535;8247;8248;8249;8250;8585;8586;8587;8588;8589;8590;8591;8592	2398;2399;2400;2401;2402;2403;2404;2405;2406;2407;2408;2409;2410;2411;2412;2413;2414;2415;2416;2417;2418;2419;2420;2421;2422;2423;2424;2425;2588;2589;2590;2591;2592;2593;2594;2595;2596;2597;2598;2599;2600;3160;3161;3351;3352;3353;3354;3355;3356;3357;3358;3359;3360;3361;3362;3750;10669;11238;11239;11240;11241;11242;11243;11244;11245;11246;11247;11248;11249;11250;11251;11252;11253;11254;11255;11256…	2419;2588;3161;3358;3750;10669;11239;11302;11592;11946;13158;13765	32	103
gi|335297595	gi|335297595	2	2	2	>gi|335297595|ref|XP_003358072.1| PREDICTED: interferon-induced 35 kDa protein [Sus scrofa]	1	2	2	2	7.4	7.4	7.4	31.453	284	284	0	12.757	1068200	59342	1068200	2	2				228	1887;2422	True;True	1975;2527	6399;8263	10069;13194	10069;13194
gi|333411211;gi|167621416;gi|167594070;gi|167594068;gi|545849828	gi|333411211;gi|167621416;gi|167594070;gi|167594068;gi|545849828	2;2;2;2;1	2;2;2;2;1	2;2;2;2;1	>gi|333411211|gb|AEF32480.1| paraoxonase 1 [Sus scrofa];>gi|167621416|ref|NP_001090984.2| serum paraoxonase/arylesterase 1 precursor [Sus scrofa];>gi|167594070|gb|ABW86949.2| paraoxonase [Sus scrofa];>gi|167594068|gb|ABO84844.2| paraoxonase 1 [Sus scrofa];	5	2	2	2	11.3	11.3	11.3	39.984	355	355;355;355;355;146	0	13.37	759110	58393	2063500	2	2				117	848;2332	True;True	887;2433	3120;7981	4984;12698	4984;12698
gi|545870145	gi|545870145	2	2	2	>gi|545870145|ref|XP_001924694.5| PREDICTED: angiotensinogen [Sus scrofa]	1	2	2	2	9	9	9	23.971	223	223	0	16.271	513570	57064	1396000	2	2				378	598;2397	True;True	626;2501	2179;8191	3497;13044	3497;13044
gi|545846902;gi|545846900	gi|545846902;gi|545846900	1;1	1;1	1;1	>gi|545846902|ref|XP_005656631.1| PREDICTED: placenta-specific gene 8 protein-like isoform X2 [Sus scrofa];>gi|545846900|ref|XP_005656630.1| PREDICTED: placenta-specific gene 8 protein-like isoform X1 [Sus scrofa]	2	1	1	1	7.2	7.2	7.2	14.198	125	125;173	1	-2	112700	56349	306340	0	0	+			365	1591	True	1660	5393	8605	8605	144	1
gi|9954355	gi|9954355	2	1	1	>gi|9954355|gb|AAG09024.1| immunoglobulin heavy chain, partial [Sus scrofa]	1	2	1	1	24.3	10.3	10.3	11.883	107	107	0.0051813	6.0498	333430	55571	906350	1	1				414	389;838	False;True	405;406;876	1507;1508;1509;1510;1511;1512;1513;1514;1515;1516;1517;1518;1519;1520;3101	2398;2399;2400;2401;2402;2403;2404;2405;2406;2407;2408;2409;2410;2411;2412;2413;2414;2415;2416;2417;2418;2419;2420;2421;2422;2423;2424;2425;4962	2419;4962	32	63
gi|354549870;gi|545893381	gi|354549870;gi|545893381	2;1	2;1	2;1	>gi|354549870|gb|AER27868.1| coronin 1A [Sus scrofa];>gi|545893381|ref|XP_005658185.1| PREDICTED: LOW QUALITY PROTEIN: coronin-1A, partial [Sus scrofa]	2	2	2	2	8.5	8.5	8.5	51.096	461	461;410	0	16.396	1269900	55212	3451900	3	3				283	288;1244	True;True	299;1295	1199;1200;4233	1941;1942;6786	1941;6786
gi|545823241;gi|545823239;gi|753703928;gi|753703926	gi|545823241;gi|545823239;gi|753703928;gi|753703926	2;2;2;1	2;2;2;1	2;2;2;1	>gi|545823241|ref|XP_005655446.1| PREDICTED: extracellular matrix protein 1 isoform X2 [Sus scrofa];>gi|545823239|ref|XP_003355250.2| PREDICTED: extracellular matrix protein 1 isoform X1 [Sus scrofa];>gi|753703928|gb|JAG69575.1| extracellular matrix protei	4	2	2	2	4.7	4.7	4.7	55.174	494	494;517;541;416	0	13.02	1398300	53783	1398300	2	2				349	342;1779	True;True	355;1864	1388;6036	2208;9547	2208;9547
gi|350594202;gi|545805185;gi|350579764	gi|350594202	6;1;1	6;1;1	6;1;1	>gi|350594202|ref|XP_003133916.3| PREDICTED: threonine--tRNA ligase, cytoplasmic-like [Sus scrofa]	3	6	6	6	11.1	11.1	11.1	77.457	674	674;799;801	0	40.462	1876100	52114	5099800	6	6				279	700;784;1188;1631;2498;2520	True;True;True;True;True;True	731;820;1239;1707;2608;2631	2446;2769;4092;5612;8611;8673	3910;4428;6559;8930;13811;13903	3910;4428;6559;8930;13811;13903
gi|350581449;gi|545813455;gi|335299964;gi|753703812;gi|343488531	gi|350581449;gi|545813455;gi|335299964;gi|753703812;gi|343488531	2;2;1;1;1	2;2;1;1;1	2;2;1;1;1	>gi|350581449|ref|XP_003481037.1| PREDICTED: guanine nucleotide-binding protein G(I)/G(S)/G(T) subunit beta-2 [Sus scrofa];>gi|545813455|ref|XP_003354523.3| PREDICTED: guanine nucleotide-binding protein G(I)/G(S)/G(T) subunit beta-2-like [Sus scrofa];>gi|3	5	2	2	2	6.5	6.5	6.5	37.331	340	340;348;233;340;340	0	11.031	667630	51356	1144300	2	2				262	1423;2127	True;True	1479;2223	4867;7216	7804;11453	7804;11453
gi|545889670;gi|311264544;gi|335307995	gi|545889670;gi|311264544;gi|335307995	1;1;1	1;1;1	1;1;1	>gi|545889670|ref|XP_005674252.1| PREDICTED: replication protein A 14 kDa subunit-like isoform X2 [Sus scrofa];>gi|311264544|ref|XP_003130216.1| PREDICTED: replication protein A 14 kDa subunit [Sus scrofa];>gi|335307995|ref|XP_003361061.1| PREDICTED: repli	3	1	1	1	10.4	10.4	10.4	10.856	96	96;96;121	1	-2	307010	51168	834540	1	1	+			196	2296	True	2397	7873	12555	12555	67	5
gi|120525;gi|10304378;gi|346421372;gi|545831933	gi|120525;gi|10304378;gi|346421372;gi|545831933	1;1;1;1	1;1;1;1	1;1;1;1	>gi|120525|sp|P19133.1|FRIL_PIG RecName: Full=Ferritin light chain; Short=Ferritin L subunit;>gi|10304378|gb|AAG16228.1| ferritin L subunit, partial [Sus scrofa];>gi|346421372|ref|NP_001231060.1| ferritin, light polypeptide [Sus scrofa];>gi|545831933|ref|X	4	1	1	1	20.5	20.5	20.5	8.7839	78	78;160;175;262	0.0027701	6.4446	249670	49934	678670	1	1				28	886	True	925	3200	5093	5093
gi|753704044;gi|52000924	gi|753704044;gi|52000924	2;1	2;1	2;1	>gi|753704044|gb|JAG69633.1| chloride intracellular channel 1 [Sus scrofa domesticus];>gi|52000924|sp|Q29238.2|CLIC1_PIG RecName: Full=Chloride intracellular channel protein 1; AltName: Full=Nuclear chloride ion channel 27	2	2	2	2	10	10	10	26.977	241	241;110	0	12.688	695420	49673	1890300	3	3				407	41;1704	True;True	43;1785	150;5811;5812;5813	304;9201;9202;9203	304;9203
gi|545893000;gi|1964;gi|657193246	gi|545893000;gi|1964;gi|657193246	2;2;2	2;2;2	2;2;2	>gi|545893000|ref|XP_003360619.2| PREDICTED: LOW QUALITY PROTEIN: transcobalamin-1 isoform 1 [Sus scrofa];>gi|1964|emb|CAA36800.1| unnamed protein product, partial [Sus scrofa];>gi|657193246|sp|P17630.2|TCO1_PIG RecName: Full=Transcobalamin-1; Short=TC-1;	3	2	2	2	8.7	8.7	8.7	35.033	311	311;416;417	0	15.363	834020	49060	834020	2	2				143	855;1445	True;True	894;1503	3134;4919	5002;7880	5002;7880
gi|222066102;gi|37693471;gi|68124034;gi|545834217;gi|350588388;gi|311263698;gi|545799446;gi|545799443;gi|223019599;gi|223019597;gi|147899784;gi|110287842	gi|222066102;gi|37693471;gi|68124034;gi|545834217;gi|350588388;gi|311263698;gi|545799446;gi|545799443;gi|223019599;gi|223019597;gi|147899784;gi|110287842	2;1;1;1;1;1;1;1;1;1;1;1	2;1;1;1;1;1;1;1;1;1;1;1	2;1;1;1;1;1;1;1;1;1;1;1	>gi|222066102|emb|CAX28482.1| eukaryotic translation elongation factor 1 alpha 2 [Sus scrofa];>gi|37693471|dbj|BAC99053.1| polypeptide chain elongation factor 1alpha, partial [Sus scrofa];>gi|68124034|emb|CAJ03391.1| elongation factor 1-alpha 1, partial [S	12	2	2	2	7.6	7.6	7.6	50.47	463	463;111;309;461;461;461;462;462;462;462;462;462	0	15.102	930800	48990	2530200	2	2				162	1093;2321	True;True	1142;2422	3823;7958	6120;12674	6120;12674
gi|1165145;gi|545803432;gi|28948618;gi|255683368;gi|20141168;gi|13399614;gi|13399613;gi|545803430	gi|1165145;gi|545803432;gi|28948618;gi|255683368;gi|20141168;gi|13399614;gi|13399613;gi|545803430	2;2;2;2;2;2;2;2	2;2;2;2;2;2;2;2	2;2;2;2;2;2;2;2	>gi|1165145|emb|CAA64477.1| annexin I, partial [Sus scrofa];>gi|545803432|ref|XP_005654562.1| PREDICTED: annexin A1 isoform X2 [Sus scrofa];>gi|28948618|pdb|1MCX|A Chain A, Structure Of Full-Length Annexin A1 In The Presence Of Calcium;>gi|255683368|ref|NP	8	2	2	2	6.7	6.7	6.7	38.239	341	341;346;346;346;346;346;346;367	0	14.119	926330	48754	2518000	4	4				50	123;127	True;True	128;132	390;391;399;400	678;679;688;689	678;688
gi|81174757;gi|90569223;gi|545891342;gi|545827763;gi|335303414;gi|350584484;gi|81174755;gi|731187726;gi|731187723;gi|71559143;gi|71559141;gi|116256086;gi|113205626;gi|545875706	gi|81174757;gi|90569223;gi|545891342;gi|545827763;gi|335303414;gi|350584484;gi|81174755;gi|731187726;gi|731187723;gi|71559143;gi|71559141;gi|116256086;gi|113205626;gi|545875706	1;1;1;1;1;1;1;1;1;1;1;1;1;1	1;1;1;1;1;1;1;1;1;1;1;1;1;1	1;1;1;1;1;1;1;1;1;1;1;1;1;1	>gi|81174757|gb|ABB58920.1| tubulin alpha, partial [Sus scrofa];>gi|90569223|gb|ABD94500.1| tubulin alpha, partial [Sus scrofa];>gi|545891342|ref|XP_005658771.1| PREDICTED: tubulin alpha-8 chain-like [Sus scrofa];>gi|545827763|ref|XP_005664192.1| PREDICTED	14	1	1	1	8.4	8.4	8.4	18.756	167	167;174;366;415;448;449;451;451;451;451;451;451;451;618	0.0029586	6.9164	335850	47979	335850	2	2				44	1376	True	1431	4710;4711	7575;7576	7576
gi|545831440;gi|291622244;gi|289186815;gi|289186813	gi|545831440;gi|291622244;gi|289186815;gi|289186813	2;2;2;2	2;2;2;2	2;2;2;2	>gi|545831440|ref|XP_005653338.1| PREDICTED: apolipoprotein C-IV isoform X1 [Sus scrofa];>gi|291622244|ref|NP_001167603.1| apolipoprotein C-IV precursor [Sus scrofa];>gi|289186815|gb|ADC91999.1| apolipoprotein C-IV [Sus scrofa];>gi|289186813|gb|ADC91998.1|	4	2	2	2	14.9	14.9	14.9	13.468	121	121;126;126;126	0	10.82	237860	47572	646580	2	2				178	176;215	True;True	183;222	734;988	1201;1610	1201;1610
gi|262072957	gi|262072957	1	1	1	>gi|262072957|dbj|BAI47786.1| elongation of long chain fatty acids, partial [Sus scrofa]	1	1	1	1	4.7	4.7	4.7	30.538	258	258	1	-2	472300	47230	1283800	1	1	+			174	2131	True	2227	7224	11467	11467	61;62	85;90
gi|545803723	gi|545803723	1	1	1	>gi|545803723|ref|XP_005660306.1| PREDICTED: paired box protein Pax-5 isoform X2 [Sus scrofa]	1	1	1	1	3.8	3.8	3.8	42.118	390	390	1	-2	559980	46665	1522200	1	1	+			336	1571	True	1637	5348	8537	8537	123;124	1;13
CON__P28800;gi|545891440	CON__P28800;gi|545891440	2;1	2;1	2;1	>P28800 SWISS-PROT:P28800 (Bos taurus) Alpha-2-antiplasmin precursor;>gi|545891440|ref|XP_005674395.1| PREDICTED: alpha-2-antiplasmin, partial [Sus scrofa]	2	2	2	2	4.3	4.3	4.3	54.71	492	492;311	0	11.832	789150	46421	1177200	3	3			+	12	1286;1685	True;True	1339;1764	4388;4389;5755	7039;7040;9123	7040;9123
gi|311269820;gi|545889123;gi|545865405	gi|311269820;gi|545889123;gi|545865405	1;1;1	1;1;1	1;1;1	>gi|311269820|ref|XP_001926098.2| PREDICTED: apolipoprotein D isoformX1 [Sus scrofa];>gi|545889123|ref|XP_005658224.1| PREDICTED: apolipoprotein D-like [Sus scrofa];>gi|545865405|ref|XP_005670140.1| PREDICTED: apolipoprotein D isoform X2 [Sus scrofa]	3	1	1	1	7.4	7.4	7.4	21.522	190	190;241;241	0	7.5781	367910	45988	1000100	1	1				202	267	True	278	1143	1845	1845
gi|545804542;gi|350579686;gi|229498;gi|125151;gi|313507265;gi|545804539	gi|545804542;gi|350579686;gi|229498;gi|125151;gi|313507265;gi|545804539	2;2;2;2;2;2	2;2;2;2;2;2	2;2;2;2;2;2	>gi|545804542|ref|XP_005660509.1| PREDICTED: adenylate kinase isoenzyme 1 isoform X3 [Sus scrofa];>gi|350579686|ref|XP_003122225.3| PREDICTED: adenylate kinase isoenzyme 1 isoformX1 [Sus scrofa];>gi|229498|prf||742496A kinase,adenylate;>gi|125151|sp|P00571	6	2	2	2	13.4	13.4	13.4	21.639	194	194;194;194;194;195;268	0	12.332	498700	45336	1355600	2	2				83	924;1106	True;True	966;1155	3302;3846	5262;6148	5262;6148
gi|545884994;gi|545884991	gi|545884994;gi|545884991	1;1	1;1	1;1	>gi|545884994|ref|XP_005673706.1| PREDICTED: structural maintenance of chromosomes protein 1A isoform X3 [Sus scrofa];>gi|545884991|ref|XP_005673705.1| PREDICTED: structural maintenance of chromosomes protein 1A isoform X2 [Sus scrofa]	2	1	1	1	0.7	0.7	0.7	145.34	1251	1251;1252	0.0027548	6.4334	3214100	45269	8736800	1	1				389	1699	True	1780	5798	9188	9188
gi|417516001;gi|335280610	gi|417516001;gi|335280610	15;14	15;14	15;14	>gi|417516001|gb|JAA53802.1| talin-1 [Sus scrofa];>gi|335280610|ref|XP_003353615.1| PREDICTED: LOW QUALITY PROTEIN: talin-1 [Sus scrofa]	2	15	15	15	8.4	8.4	8.4	269.83	2541	2541;2544	0	97.629	5971400	44898	13141000	29	29				309	5;20;80;100;516;526;774;858;958;1433;1564;1658;2159;2346;2405	True;True;True;True;True;True;True;True;True;True;True;True;True;True;True	5;20;83;103;541;551;810;897;1001;1491;1630;1735;2255;2449;2509	8;9;10;61;258;324;325;1936;1967;1968;2743;2744;2745;3137;3389;3390;3391;3392;4901;5334;5335;5694;7317;8027;8028;8213;8214;8215	12;13;14;15;16;17;135;498;596;597;3103;3156;3157;4385;4386;4387;5005;5381;5382;5383;5384;7862;8522;8523;9039;11620;12783;12784;13084;13085;13086	14;135;498;597;3103;3157;4385;5005;5383;7862;8522;9039;11620;12783;13086
gi|85720739;gi|545859907;gi|545859904;gi|545859901;gi|167859940;gi|167859938;gi|122134154;gi|113205498;gi|110349182;gi|545859898;gi|545827421	gi|85720739;gi|545859907;gi|545859904;gi|545859901;gi|167859940;gi|167859938;gi|122134154;gi|113205498;gi|110349182;gi|545859898;gi|545827421	2;2;2;2;2;2;2;2;2;2;1	2;2;2;2;2;2;2;2;2;2;1	1;1;1;1;1;1;1;1;1;1;0	>gi|85720739|gb|ABC75829.1| beta-enolase 3 [Sus scrofa];>gi|545859907|ref|XP_005669213.1| PREDICTED: beta-enolase isoform X4 [Sus scrofa];>gi|545859904|ref|XP_005669212.1| PREDICTED: beta-enolase isoform X3 [Sus scrofa];>gi|545859901|ref|XP_005669211.1| PR	11	2	2	1	6.7	6.7	2.5	47.13	434	434;434;434;434;434;434;434;434;434;440;434	0	14.862	975840	44356	1830600	3	3				36	13;2092	True;True	13;2186	43;44;7114	104;105;11296	104;11296
gi|545859496	gi|545859496	1	1	1	>gi|545859496|ref|XP_005669161.1| PREDICTED: uncharacterized protein LOC100521041 [Sus scrofa]	1	1	1	1	5.2	5.2	5.2	51.175	477	477	0	8.6635	1106300	44251	3007200	1	1				374	1439	True	1497	4910	7871	7871
gi|753703724;gi|462328;gi|1978;gi|178056524	gi|753703724;gi|462328;gi|1978;gi|178056524	1;1;1;1	1;1;1;1	1;1;1;1	>gi|753703724|gb|JAG69473.1| heat shock 70kDa protein 6 (HSP70B) [Sus scrofa domesticus];>gi|462328|sp|Q04967.1|HSP76_PIG RecName: Full=Heat shock 70 kDa protein 6; AltName: Full=Heat shock 70 kDa protein B;>gi|1978|emb|CAA48295.1| heat shock protein 70	4	1	1	1	1.7	1.7	1.7	71.042	643	643;643;643;643	0	7.9893	1554400	43179	3449700	4	4				125	2310	True	2411	7911;7912;7913;7914	12612;12613;12614;12615	12615
gi|753704216;gi|545825732	gi|753704216;gi|545825732	1;1	1;1	1;1	>gi|753704216|gb|JAG69652.1| CD63 molecule [Sus scrofa domesticus];>gi|545825732|ref|XP_005663935.1| PREDICTED: CD63 antigen [Sus scrofa]	2	1	1	1	4.2	4.2	4.2	25.839	237	237;237	0	9.5058	301470	43068	508090	11	11				352	540	True	565	2011;2012;2013;2014	3211;3212;3213;3214;3215;3216;3217;3218;3219;3220;3221	3214
gi|545804218	gi|545804218	1	1	1	>gi|545804218|ref|XP_005660442.1| PREDICTED: astrotactin-2, partial [Sus scrofa]	1	1	1	1	5.4	5.4	5.4	29.406	261	261	1	-2	469420	42675	1276000	1	1	+			337	1602	True	1674	5434	8667	8667	125	1
gi|9968809	gi|9968809	3	1	1	>gi|9968809|emb|CAC06757.1| alpha-1-antichymotrypsin 1, partial [Sus scrofa]	1	3	1	1	14.7	7.4	7.4	24.676	217	217	0.0028169	6.5316	507780	42315	507780	2	2				415	734;1375;1920	False;True;False	769;1430;2011	2554;2555;4708;4709;6530	4081;4082;7573;7574;10307	4082;7574;10307
gi|335309500;CON__Q2TBQ1	gi|335309500	4;1	4;1	4;1	>gi|335309500|ref|XP_003361662.1| PREDICTED: coagulation factor XIII B chain [Sus scrofa]	2	4	4	4	8.9	8.9	8.9	75.253	663	663;661	0	30.335	1326100	41440	3604700	3	3				232	1060;1118;2224;2556	True;True;True;True	1109;1168;2323;2669	3749;3892;7502;8847	5997;6237;11899;14187	5997;6237;11899;14187
gi|41323641	gi|41323641	3	1	1	>gi|41323641|gb|AAR99978.1| immunoglobulin kappa variable region, partial [Sus scrofa]	1	3	1	1	28.8	10.6	10.6	14.42	132	132	0.002907	6.8795	245510	40918	667360	1	1				301	750;2040;2303	False;False;True	785;2133;2404	2673;2674;2675;2676;2677;2678;2679;6858;6859;6860;6861;6862;7894	4277;4278;4279;4280;4281;4282;4283;4284;4285;4286;4287;4288;4289;4290;4291;4292;4293;4294;4295;10806;10807;10808;10809;10810;10811;10812;10813;10814;10815;10816;10817;10818;12585	4287;10814;12585
gi|335297259;gi|24416036	gi|335297259;gi|24416036	2;1	2;1	2;1	>gi|335297259|ref|XP_003131182.2| PREDICTED: neuronal pentraxin-1 [Sus scrofa];>gi|24416036|emb|CAD54732.2| neuronal pentraxin I, partial [Sus scrofa]	2	2	2	2	4.4	4.4	4.4	47.137	432	432;141	0	12.816	820210	37282	1473500	3	3				227	724;1071	True;True	758;1120	2522;2523;3780	4028;4029;6067	4029;6067
CON__Q86YZ3	CON__Q86YZ3	6	6	6	>Q86YZ3 SWISS-PROT:Q86YZ3 Tax_Id=9606 Gene_Symbol=HRNR Hornerin	1	6	6	6	8	8	8	282.39	2850	2850	0	48.237	3153100	37095	6826300	22	22			+	23	806;919;987;1807;1915;2044	True;True;True;True;True;True	843;961;1031;1892;2005;2137	2895;2896;2897;3289;3290;3291;3292;3293;3294;3295;3459;3460;6116;6117;6118;6504;6883	4638;4639;4640;4641;4642;4643;5249;5250;5251;5252;5253;5254;5255;5495;5496;5497;9651;9652;9653;9654;10276;10893	4642;5252;5497;9653;10276;10893
gi|335293644;gi|255068732;gi|51863317;CON__Q3MHN5;CON__ENSEMBL:ENSBTAP00000018229	gi|335293644;gi|255068732;gi|51863317;CON__Q3MHN5;CON__ENSEMBL:ENSBTAP00000018229	2;1;1;1;1	2;1;1;1;1	2;1;1;1;1	>gi|335293644|ref|XP_003357019.1| PREDICTED: vitamin D-binding protein [Sus scrofa];>gi|255068732|emb|CAX36905.1| vitamin D binding protein, partial [Sus scrofa];>gi|51863317|gb|AAU11816.1| vitamin D-binding protein, partial [Sus scrofa];>Q3MHN5 SWISS-PROT	5	2	2	2	7	7	7	53.161	473	473;112;218;474;475	0	18.026	917050	36682	2492800	3	3			+	225	2389;2432	True;True	2493;2538	8147;8294;8295	12953;13248;13249	12953;13249
gi|388890649;CON__ENSEMBL:ENSBTAP00000031900	gi|388890649	5;1	5;1	0;0	>gi|388890649|gb|AFK80360.1| ceruloplasmin [Sus scrofa]	2	5	5	0	4.5	4.5	0	125.54	1100	1100;1064	0	32.145	2011400	35918	4463400	10	10				292	67;136;341;892;1696	True;True;True;True;True	70;142;354;931;1776	223;224;425;1384;1385;1386;1387;3224;5787	446;447;717;2204;2205;2206;2207;5139;5140;9167	446;717;2206;5139;9167
gi|91983314;gi|85816356;gi|753704236;gi|156766197;gi|117168952;gi|89114232;gi|156071434;gi|154623575;gi|68500741	gi|91983314;gi|85816356;gi|753704236;gi|156766197;gi|117168952;gi|89114232;gi|156071434;gi|154623575;gi|68500741	2;2;2;2;2;1;1;1;1	2;2;2;2;2;1;1;1;1	2;2;2;2;2;1;1;1;1	>gi|91983314|gb|ABE68723.1| CD14 [Sus scrofa];>gi|85816356|gb|ABC84487.1| CD14 antigen [Sus scrofa];>gi|753704236|gb|JAG69662.1| CD14 molecule [Sus scrofa domesticus];>gi|156766197|gb|ABU94748.1| CD14 [Sus scrofa];>gi|117168952|gb|ABK32433.1| CD14 antigen	9	2	2	2	7	7	7	39.77	373	373;373;373;373;373;106;373;373;373	0	31.544	701560	35078	1907000	3	3				56	1889;1968	True;True	1977;2060	6404;6652;6653	10078;10501;10502	10078;10502
gi|343432674;gi|343432672;gi|545891235	gi|343432674;gi|343432672;gi|545891235	1;1;1	1;1;1	1;1;1	>gi|343432674|ref|NP_001230351.1| carbohydrate kinase domain-containing protein isoform 2 [Sus scrofa];>gi|343432672|ref|NP_001230350.1| carbohydrate kinase domain-containing protein isoform 1 [Sus scrofa];>gi|545891235|ref|XP_005658752.1| PREDICTED: ATP-d	3	1	1	1	5.8	5.8	5.8	34.776	329	329;347;500	0.0029155	6.8962	652830	34360	1774600	1	1				235	2342	True	2444	8016	12766	12766
gi|47522666;gi|452437;gi|298556706;gi|262072802;gi|1169932	gi|47522666;gi|452437;gi|298556706;gi|262072802;gi|1169932	1;1;1;1;1	1;1;1;1;1	1;1;1;1;1	>gi|47522666|ref|NP_999074.1| glutamine synthetase [Sus scrofa];>gi|452437|emb|CAA82747.1| glutamine synthetase [Sus scrofa];>gi|298556706|emb|CBN69800.1| unnamed protein product [Sus scrofa domesticus];>gi|262072802|dbj|BAI47709.1| glutamate-ammonia ligas	5	1	1	1	2.7	2.7	2.7	42.03	373	373;373;373;373;373	0	15.442	435520	33502	813810	2	2				53	197	True	204	801;802	1314;1315	1315
gi|350583599;gi|66360254;gi|62738255;gi|38493023;gi|3660153;gi|294662450;gi|294662449;gi|2780980;gi|21730571;gi|21730570;gi|21730568;gi|21730566;gi|21730564;gi|21730559;gi|21730558;gi|21730557;gi|21730556;gi|15825762;gi|157833551;gi|157833499;gi|157833498;gi|157832576;gi|157831547;gi|6056338;gi|545823942;gi|545823940;gi|545823936;gi|545823933;gi|545823931;gi|545823929;gi|545823927;gi|545823925;gi…	gi|350583599;gi|66360254;gi|62738255;gi|38493023;gi|3660153;gi|294662450;gi|294662449;gi|2780980;gi|21730571;gi|21730570;gi|21730568;gi|21730566;gi|21730564;gi|21730559;gi|21730558;gi|21730557;gi|21730556;gi|15825762;gi|157833551;gi|157833499;gi|157833498;gi|157832576;gi|157831547;gi|6056338;gi|545823942;gi|545823940;gi|545823936;gi|545823933;gi|545823931;gi|545823929;gi|545823927;gi|545823925;gi…	2;2;2;2;2;2;2;2;2;2;2;2;2;2;2;2;2;2;2;2;2;2;2;2;2;2;2;2;2;2;2;2;2;2;2;2;2;2;1	2;2;2;2;2;2;2;2;2;2;2;2;2;2;2;2;2;2;2;2;2;2;2;2;2;2;2;2;2;2;2;2;2;2;2;2;2;2;1	2;2;2;2;2;2;2;2;2;2;2;2;2;2;2;2;2;2;2;2;2;2;2;2;2;2;2;2;2;2;2;2;2;2;2;2;2;2;1	>gi|350583599|ref|XP_003481550.1| PREDICTED: pancreatic alpha-amylase-like [Sus scrofa];>gi|66360254|pdb|1VAH|A Chain A, Crystal Structure Of The Pig Pancreatic-Amylase Complexed With R-Nitrophenyl-A-D-Maltoside;>gi|62738255|pdb|1WO2|A Chain A, Crystal Str	39	2	2	2	5.2	5.2	5.2	51.386	462	462;496;496;496;496;496;496;496;496;496;496;496;496;496;496;496;496;496;496;496;496;496;496;511;511;511;511;511;511;511;511;511;511;511;511;511;511;511;511	0	13.27	629770	33146	1711900	2	2			+	101	298;1369	True;True	309;1424	1219;4686	1978;7540	1978;7540
gi|311250082	gi|311250082	2	2	2	>gi|311250082|ref|XP_003123949.1| PREDICTED: isochorismatase domain-containing protein 1 [Sus scrofa]	1	2	2	2	10.8	10.8	10.8	32.104	297	297	0	12.897	426030	32771	1158100	2	2				188	705;736	True;True	737;771	2459;2557	3926;4084	3926;4084
gi|7141254;gi|52346218	gi|7141254;gi|52346218	1;1	1;1	1;1	>gi|7141254|gb|AAF37271.1|AF222861_1 type X collagen [Sus scrofa];>gi|52346218|ref|NP_001005153.1| collagen alpha-1(X) chain precursor [Sus scrofa]	2	1	1	1	1.9	1.9	1.9	65.446	675	675;675	0	7.5242	1009600	32566	2744300	1	1				333	222	True	229	1005	1631	1631
gi|229620;gi|473575;gi|282403838;gi|282403837;gi|164518958;gi|1170738;gi|545827120;gi|56792872;gi|56792857;gi|56792870;gi|56792866	gi|229620;gi|473575;gi|282403838;gi|282403837;gi|164518958;gi|1170738;gi|545827120	3;3;3;3;3;3;2;1;1;1;1	1;1;1;1;1;1;1;1;1;1;1	1;1;1;1;1;1;1;1;1;1;1	>gi|229620|prf||770227A dehydrogenase H4,lactate;>gi|473575|gb|AAA50438.1| lactate dehydrogenase-B [Sus scrofa domesticus];>gi|282403838|pdb|5LDH|B Chain B, Structure Of The Active Ternary Complex Of Pig Heart Lactate Dehydrogenase With S-Lac-Nad At 2.7 An	11	3	1	1	10.5	4.5	4.5	36.088	333	333;334;334;334;334;334;310;195;195;196;199	0	10.772	483670	32245	1314800	2	2				54	892;1696;1994	False;False;True	931;1776;2087	3224;5787;6720;6721	5139;5140;9167;10621;10622	5139;9167;10621
gi|158512830;gi|148232214;gi|124265188	gi|158512830;gi|148232214;gi|124265188	3;3;3	3;3;3	3;3;3	>gi|158512830|sp|A2TLM1.1|RPIA_PIG RecName: Full=Ribose-5-phosphate isomerase; AltName: Full=Phosphoriboisomerase;>gi|148232214|ref|NP_001090964.1| ribose-5-phosphate isomerase [Sus scrofa];>gi|124265188|gb|ABM98101.1| ribose 5-phosphate isomerase-like pro	3	3	3	3	17	17	17	32.695	306	306;306;306	0	21.563	577580	32088	1570000	3	3				82	825;852;2525	True;True;True	862;891;2636	3059;3131;8688	4901;4999;13921	4901;4999;13921
gi|225735709;gi|224492556	gi|225735709;gi|224492556	9;9	9;9	9;9	>gi|225735709|ref|NP_001139599.1| clathrin heavy chain 1 [Sus scrofa];>gi|224492556|emb|CAR65329.1| clathrin heavy chain [Sus scrofa]	2	9	9	9	7.2	7.2	7.2	191.61	1675	1675;1675	0	62.07	2771400	31493	7533400	8	8				165	55;105;922;1098;1411;1663;2064;2179;2579	True;True;True;True;True;True;True;True;True	58;108;964;1147;1466;1740;2158;2275;2694	183;335;3298;3830;4835;5707;6998;7364;8908	354;613;5258;6127;7766;9061;11096;11701;14293	354;613;5258;6127;7766;9061;11096;11701;14293
gi|545876125;gi|545876122;gi|92020123;gi|92020131	gi|545876125;gi|545876122	13;13;3;1	13;13;3;1	13;13;3;1	>gi|545876125|ref|XP_005672367.1| PREDICTED: collagen alpha-3(VI) chain isoform X3 [Sus scrofa];>gi|545876122|ref|XP_001928130.3| PREDICTED: collagen alpha-3(VI) chain isoformX2 [Sus scrofa]	4	13	13	13	7.3	7.3	7.3	313.33	2902	2902;3082;313;237	0	92.458	4861600	31365	11132000	18	18				383	3;1050;1064;1065;1067;1086;1437;1494;1617;2117;2427;2428;2484	True;True;True;True;True;True;True;True;True;True;True;True;True	3;1099;1113;1114;1116;1135;1495;1553;1692;2212;2532;2533;2594	6;3728;3754;3755;3770;3811;4905;4906;4907;5055;5056;5562;5563;7192;8283;8284;8285;8527	10;5975;6004;6005;6045;6106;7866;7867;7868;8080;8081;8082;8851;8852;11425;13234;13235;13236;13647	10;5975;6004;6005;6045;6106;7867;8082;8852;11425;13234;13236;13647
gi|297747304;gi|32400253;CON__P81644	gi|297747304;gi|32400253;CON__P81644	2;1;1	2;1;1	2;1;1	>gi|297747304|ref|NP_001173223.1| apolipoprotein A-II precursor [Sus scrofa];>gi|32400253|emb|CAD91908.1| apolipoprotein A2, partial [Sus scrofa];>P81644 SWISS-PROT:P81644 (Bos taurus) Apolipoprotein A-II precursor	3	2	2	2	25	25	25	11.113	100	100;17;100	0	14.546	151270	30253	328330	4	4			+	181	70;928	True;True	73;970	229;3310;3311	452;5270;5271;5272	452;5271
gi|545873598	gi|545873598	6	6	6	>gi|545873598|ref|XP_005657583.1| PREDICTED: myomesin-2 [Sus scrofa]	1	6	6	6	7.8	7.8	7.8	125.36	1125	1125	0	52.148	1873500	30218	5092800	6	6				381	174;764;920;1045;1129;2052	True;True;True;True;True;True	181;799;962;1093;1180;2145	732;2715;3296;3712;3934;6910	1198;4347;5256;5940;6304;10941	1198;4347;5256;5940;6304;10941
gi|545841017;gi|545841014;gi|545841009;gi|545841006;gi|545841003;gi|545841000;gi|545840997;gi|545840994;gi|545840991;gi|545840988;gi|545840982;gi|545840979;gi|545840976;gi|753703334;gi|194038728;gi|545840985	gi|545841017;gi|545841014;gi|545841009;gi|545841006;gi|545841003;gi|545841000;gi|545840997;gi|545840994;gi|545840991;gi|545840988;gi|545840982;gi|545840979;gi|545840976;gi|753703334;gi|194038728;gi|545840985	5;5;5;5;5;5;5;5;5;5;5;5;5;3;3;3	5;5;5;5;5;5;5;5;5;5;5;5;5;3;3;3	5;5;5;5;5;5;5;5;5;5;5;5;5;3;3;3	>gi|545841017|ref|XP_005666246.1| PREDICTED: poly [ADP-ribose] polymerase 6 isoform X15 [Sus scrofa];>gi|545841014|ref|XP_005666245.1| PREDICTED: poly [ADP-ribose] polymerase 6 isoform X14 [Sus scrofa];>gi|545841009|ref|XP_005666244.1| PREDICTED: poly [ADP	16	5	5	5	13	13	13	58.032	531	531;531;531;582;596;603;616;732;1117;1118;1138;1138;1138;531;531;1138	0	37.796	886900	28610	2265200	7	7				359	64;251;461;688;2503	True;True;True;True;True	67;261;484;719;2613	220;1102;1765;2411;2412;2413;8623	443;1781;2823;3840;3841;3842;13827	443;1781;2823;3841;13827
gi|796690844;gi|6863080;gi|47523406	gi|796690844;gi|6863080;gi|47523406	2;2;2	2;2;2	2;2;2	>gi|796690844|gb|AKA60243.1| transmembrane secretory component poly-Ig receptor, partial [Sus scrofa];>gi|6863080|dbj|BAA84283.2| poly-Ig receptor [Sus scrofa];>gi|47523406|ref|NP_999324.1| polymeric immunoglobulin receptor precursor [Sus scrofa]	3	2	2	2	5.9	5.9	5.9	67.307	614	614;758;758	0	12.669	883930	28514	883930	2	2				330	966;2015	True;True	1009;2108	3413;6784	5416;10705	5416;10705
gi|350587403	gi|350587403	1	1	1	>gi|350587403|ref|XP_003128928.3| PREDICTED: probable G-protein coupled receptor 125 [Sus scrofa]	1	1	1	1	2.2	2.2	2.2	60.228	549	549	1	-2	501220	27846	1362500	1	1	+			270	1581	True	1649	5369	8570	8570	114	1
gi|335289358;gi|545829766;gi|164414678;gi|47523572;gi|3831588;gi|363817363;gi|2494384;gi|228274;gi|1931	gi|335289358;gi|545829766;gi|164414678;gi|47523572;gi|3831588;gi|363817363;gi|2494384;gi|228274;gi|1931	1;1;1;1;1;1;1;1;1	1;1;1;1;1;1;1;1;1	1;1;1;1;1;1;1;1;1	>gi|335289358|ref|XP_003127023.2| PREDICTED: liver carboxylesterase-like [Sus scrofa];>gi|545829766|ref|XP_005653313.1| PREDICTED: liver carboxylesterase-like [Sus scrofa];>gi|164414678|emb|CAO81735.1| Alternative Pig Liver Esterase, partial [Sus scrofa];>	9	1	1	1	16.4	16.4	16.4	13.85	122	122;506;548;565;565;566;566;566;566	0.0027027	6.2762	136950	27390	372260	1	1				112	2239	True	2338	7558	11976	11976
gi|545826523;gi|350584251	gi|545826523;gi|350584251	1;1	1;1	1;1	>gi|545826523|ref|XP_005664030.1| PREDICTED: bestrophin-3 isoform X2 [Sus scrofa];>gi|350584251|ref|XP_003481706.1| PREDICTED: bestrophin-3 isoform X1 [Sus scrofa]	2	1	1	1	3.5	3.5	3.5	51.314	460	460;673	1	-2	432650	27040	432650	1	1	+			268	421	True	440	1609	2562	2562	113	49
gi|343887367;gi|545849798;gi|545890604	gi|343887367;gi|545849798;gi|545890604	3;3;2	3;3;2	3;3;2	>gi|343887367|ref|NP_001230584.1| collagen, type I, alpha 2 precursor [Sus scrofa];>gi|545849798|ref|XP_005667671.1| PREDICTED: collagen, type I, alpha 2 isoform X1 [Sus scrofa];>gi|545890604|ref|XP_005674338.1| PREDICTED: collagen alpha-2(I) chain-like [S	3	3	3	3	2.6	2.6	2.6	129.22	1366	1366;1370;945	0	20.69	1743400	25639	4739200	3	3				239	799;907;917	True;True;True	836;949;959	2809;2810;3267;3284	4493;4494;5217;5240	4493;5217;5240
gi|545853404;gi|753702890;gi|545853401;gi|408360214	gi|545853404;gi|753702890;gi|545853401;gi|408360214	2;2;2;2	1;1;1;1	1;1;1;1	>gi|545853404|ref|XP_005668164.1| PREDICTED: vimentin isoform X2 [Sus scrofa];>gi|753702890|gb|JAG69056.1| vimentin [Sus scrofa domesticus];>gi|545853401|ref|XP_005668163.1| PREDICTED: vimentin isoform X1 [Sus scrofa];>gi|408360214|sp|P02543.2|VIME_PIG Rec	4	2	1	1	4	2.3	2.3	49.22	427	427;466;466;466	0	7.8258	753290	25110	1178200	2	2				294	697;1119	False;True	728;1169	2438;3893;3894	3884;6238;6239	3884;6239
gi|344259276;gi|344259274;gi|346716138	gi|344259276;gi|344259274;gi|346716138	1;1;1	1;1;1	1;1;1	>gi|344259276|gb|AEN03335.1| proteasome subunit beta type 6 [Sus scrofa];>gi|344259274|gb|AEN03334.1| proteasome subunit beta type 6 [Sus scrofa];>gi|346716138|ref|NP_001138398.2| proteasome subunit beta type-6 [Sus scrofa]	3	1	1	1	4.2	4.2	4.2	25.433	239	239;239;241	0.0051546	6.0216	269340	24486	732150	1	1				240	2236	True	2335	7548	11965	11965
gi|545834651;gi|545834649;gi|335290854;gi|545834646;gi|545834644;gi|545834642	gi|545834651;gi|545834649;gi|335290854;gi|545834646;gi|545834644;gi|545834642	3;3;3;3;3;3	3;3;3;3;3;3	3;3;3;3;3;3	>gi|545834651|ref|XP_005653450.1| PREDICTED: protein 4.1 isoform X6 [Sus scrofa];>gi|545834649|ref|XP_005653449.1| PREDICTED: protein 4.1 isoform X5 [Sus scrofa];>gi|335290854|ref|XP_003127793.2| PREDICTED: protein 4.1 isoformX1 [Sus scrofa];>gi|545834646|	6	3	3	3	4.1	4.1	4.1	90.369	806	806;846;860;872;957;1023	0	27.726	936030	24001	2544400	3	3				221	592;1517;2449	True;True;True	620;1581;2555	2159;5136;8343	3433;8195;13318	3433;8195;13318
gi|164417;gi|116551;gi|341823654;gi|225385	gi|164417;gi|116551;gi|341823654;gi|225385	2;2;2;1	2;2;2;1	2;2;2;1	>gi|164417|gb|AAA31016.1| chromogranin A precursor, partial [Sus scrofa];>gi|116551|sp|P04404.2|CMGA_PIG RecName: Full=Chromogranin-A; Short=CgA; Contains: RecName: Full=Pancreastatin; Contains: RecName: Full=Parastatin; Contains: RecName: Full=WE-14; Cont	4	2	2	2	5.4	5.4	5.4	48.882	446	446;446;448;49	0	14.118	556480	23187	861500	3	3				51	916;2130	True;True	958;2226	3283;7222;7223	5239;11465;11466	5239;11466
gi|636528720;gi|636528718;gi|636528708;gi|636528706;gi|636528696;gi|636528680;gi|636528672;gi|610497388;gi|610497384;gi|558701299;gi|443298251;gi|443298249;gi|443298247;gi|393888890;gi|38503442;gi|350536171;gi|29027441;gi|20378724;gi|20378720;gi|18652156;gi|168828747;gi|168828737;gi|148469870;gi|112292693;gi|532691475;gi|668592474;gi|558701307;gi|443298285;gi|313057604;gi|313057602;gi|313057598;g…	gi|636528720;gi|636528718;gi|636528708;gi|636528706;gi|636528696;gi|636528680;gi|636528672;gi|610497388;gi|610497384;gi|558701299;gi|443298251;gi|443298249;gi|443298247;gi|393888890;gi|38503442;gi|350536171;gi|29027441;gi|20378724;gi|20378720;gi|18652156;gi|168828747;gi|168828737;gi|148469870;gi|112292693;gi|532691475;gi|668592474;gi|558701307;gi|443298285;gi|313057604;gi|313057602;gi|313057598;g…	4;4;4;4;4;4;4;4;4;4;4;4;4;4;4;4;4;4;4;4;4;4;4;4;4;4;4;4;4;4;4;4;4;4;4;4;3;3;3;3;3;3	1;1;1;1;1;1;1;1;1;1;1;1;1;1;1;1;1;1;1;1;1;1;1;1;1;1;1;1;1;1;1;1;1;1;1;1;1;1;1;1;1;1	0;0;0;0;0;0;0;0;0;0;0;0;0;0;0;0;0;0;0;0;0;0;0;0;0;0;0;0;0;0;0;0;0;0;0;0;0;0;0;0;0;0	>gi|636528720|gb|AHZ96836.1| MHC class I antigen [Sus scrofa];>gi|636528718|gb|AHZ96835.1| MHC class I antigen [Sus scrofa];>gi|636528708|gb|AHZ96830.1| MHC class I antigen [Sus scrofa];>gi|636528706|gb|AHZ96829.1| MHC class I antigen [Sus scrofa];>gi|6365	42	4	1	0	17.7	3.9	0	40.123	361	361;361;361;361;361;361;361;361;361;361;361;361;361;361;361;361;361;361;361;361;361;361;361;361;362;364;364;364;364;364;364;364;364;364;364;364;361;361;361;361;361;364	0.002924	6.9071	360470	21204	360470	1	1				38	281;677;1017;2504	False;True;False;False	292;707;1063;2614	1173;1174;1175;2381;3607;3608;8624	1902;1903;1904;3803;5755;5756;13828	1902;3803;5755;13828
gi|545876976	gi|545876976	1	1	1	>gi|545876976|ref|XP_005672482.1| PREDICTED: WD repeat-containing protein 70-like [Sus scrofa]	1	1	1	1	9.5	9.5	9.5	17.568	158	158	1	-2	168030	21004	456750	1	1	+			385	1578	True	1646	5365	8564	8564	151;152	1;6
gi|545851594;gi|545851591;gi|311265059	gi|545851594;gi|545851591;gi|311265059	1;1;1	1;1;1	1;1;1	>gi|545851594|ref|XP_005667938.1| PREDICTED: SERTA domain-containing protein 4 isoform X3 [Sus scrofa];>gi|545851591|ref|XP_005667937.1| PREDICTED: SERTA domain-containing protein 4 isoform X2 [Sus scrofa];>gi|311265059|ref|XP_003130467.1| PREDICTED: SERTA	3	1	1	1	2.6	2.6	2.6	38.674	349	349;349;349	1	-2	300410	20027	816590	1	1	+			197	1606	True	1678	5441	8678	8678	68	1
gi|545801009	gi|545801009	3	3	3	>gi|545801009|ref|XP_005659747.1| PREDICTED: LOW QUALITY PROTEIN: erythrocyte membrane protein band 4.2 [Sus scrofa]	1	3	3	3	7	7	7	79.273	718	718	0	22.773	660050	20001	1491500	9	9				335	528;1677;2391	True;True;True	553;1756;2495	1970;5738;5739;5740;5741;8149	3159;9099;9100;9101;9102;9103;9104;9105;12956	3159;9103;12956
gi|545894113	gi|545894113	1	1	1	>gi|545894113|ref|XP_003361389.2| PREDICTED: high mobility group protein B4 [Sus scrofa]	1	1	1	1	6.4	6.4	6.4	28.883	251	251	1	-2	236140	19678	641900	1	1	+			394	1235	True	1286	4196	6697	6697	162;163	54;56
CON__P12763	CON__P12763	1	1	1	>P12763 SWISS-PROT:P12763 (Bos taurus) Alpha-2-HS-glycoprotein precursor	1	1	1	1	3.1	3.1	3.1	38.418	359	359	0.002809	6.5237	271590	19400	271590	1	1			+	9	1741	True	1825	5923	9363	9363
gi|753703262;gi|350589372;gi|90569235;gi|38324536;gi|38324534;gi|38324532;gi|38324530;gi|545852635;gi|38324528;gi|38324526	gi|753703262;gi|350589372	3;2;1;1;1;1;1;1;1;1	3;2;1;1;1;1;1;1;1;1	3;2;1;1;1;1;1;1;1;1	>gi|753703262|gb|JAG69242.1| protein tyrosine phosphatase, receptor type, C [Sus scrofa domesticus];>gi|350589372|ref|XP_003130644.3| PREDICTED: receptor-type tyrosine-protein phosphatase C [Sus scrofa]	10	3	3	3	2.8	2.8	2.8	131.88	1162	1162;688;120;454;466;501;517;566;567;583	0	19.922	1052800	19142	1052800	3	3				405	554;1331;1587	True;True;True	580;1385;1655	2049;4497;5381	3268;7193;7194;8584	3268;7193;8584
gi|1399282;gi|1661110;gi|4809241;gi|85542050;gi|74024903;gi|71842219;gi|166209293;gi|112980815	gi|1399282;gi|1661110;gi|4809241;gi|85542050;gi|74024903;gi|71842219;gi|166209293;gi|112980815	1;1;1;1;1;1;1;1	1;1;1;1;1;1;1;1	1;1;1;1;1;1;1;1	>gi|1399282|gb|AAB03248.1| hypoxanthine phosphoribosyltransferase, partial [Sus scrofa];>gi|1661110|gb|AAB18389.1| hypoxanthine phosphoribosyltransferase, partial [Sus scrofa];>gi|4809241|gb|AAD30159.1| hypoxanthine phosphoribosyltransferase, partial [Sus	8	1	1	1	7.4	7.4	7.4	15.017	135	135;136;142;218;218;218;218;218	0.0029326	6.9074	169790	18865	461530	1	1				40	2189	True	2286	7388	11728	11728
gi|350591803;gi|545865190;gi|350591801	gi|350591803;gi|545865190;gi|350591801	1;1;1	1;1;1	1;1;1	>gi|350591803|ref|XP_003132627.3| PREDICTED: kininogen-1 isoformX2 [Sus scrofa];>gi|545865190|ref|XP_005652427.1| PREDICTED: kininogen-1 isoform X4 [Sus scrofa];>gi|350591801|ref|XP_003483336.1| PREDICTED: kininogen-1 isoform X3 [Sus scrofa]	3	1	1	1	2.8	2.8	2.8	43.865	390	390;400;426	0.0027248	6.3532	466190	18647	1267200	1	1				275	1057	True	1106	3745	5993	5993
CON__Q04695;CON__Q9QWL7	CON__Q04695;CON__Q9QWL7	8;8	1;1	1;1	>Q04695 SWISS-PROT:Q04695 Tax_Id=9606 Gene_Symbol=KRT17 Keratin, type I cytoskeletal 17;>Q9QWL7 SWISS-PROT:Q9QWL7 Tax_Id=10090 Gene_Symbol=Krt17 Keratin, type I cytoskeletal 17	2	8	1	1	18.1	2.8	2.8	48.105	432	432;433	0.0028736	6.756	535430	18463	1455400	1	1			+	15	103;243;623;1265;1281;1318;1642;2386	True;False;False;False;False;False;False;False	106;252;253;651;1317;1334;1372;1719;2490	330;1074;1075;1076;2232;2233;2234;2235;4328;4329;4330;4331;4371;4372;4373;4374;4463;5645;5646;8135;8136;8137	602;1734;1735;1736;3583;3584;3585;3586;6912;6913;6914;6915;6916;6917;6918;6919;6920;6921;6922;6923;7004;7005;7006;7007;7008;7009;7010;7011;7150;7151;8970;8971;12930;12931;12932	602;1735;3584;6915;7006;7151;8971;12931	0	360
gi|30909255;gi|83596445;gi|686400651;gi|686400649;gi|668592188;gi|668592165;gi|66796209;gi|66796207;gi|610497485;gi|56553298;gi|393888935;gi|393713324;gi|393713322;gi|33465813;gi|32699972;gi|32250688;gi|30909275;gi|30909273;gi|30909271;gi|30909269;gi|30909265;gi|30909257;gi|30909251;gi|29888125;gi|29888117;gi|29124718;gi|29124716;gi|29124714;gi|284192648;gi|284192646;gi|283857933;gi|283857931;gi|…	gi|30909255;gi|83596445;gi|686400651;gi|686400649;gi|668592188;gi|668592165;gi|66796209;gi|66796207;gi|610497485;gi|56553298;gi|393888935;gi|393713324;gi|393713322;gi|33465813;gi|32699972;gi|32250688;gi|30909275;gi|30909273;gi|30909271;gi|30909269;gi|30909265;gi|30909257;gi|30909251;gi|29888125;gi|29888117;gi|29124718;gi|29124716;gi|29124714;gi|284192648;gi|284192646;gi|283857933;gi|283857931;gi|…	1;1;1;1;1;1;1;1;1;1;1;1;1;1;1;1;1;1;1;1;1;1;1;1;1;1;1;1;1;1;1;1;1;1;1;1;1;1;1;1;1;1;1;1;1;1	1;1;1;1;1;1;1;1;1;1;1;1;1;1;1;1;1;1;1;1;1;1;1;1;1;1;1;1;1;1;1;1;1;1;1;1;1;1;1;1;1;1;1;1;1;1	1;1;1;1;1;1;1;1;1;1;1;1;1;1;1;1;1;1;1;1;1;1;1;1;1;1;1;1;1;1;1;1;1;1;1;1;1;1;1;1;1;1;1;1;1;1	>gi|30909255|gb|AAP37552.1| MHC class II antigen, partial [Sus scrofa];>gi|83596445|gb|ABC25562.1| MHC class II antigen [Sus scrofa];>gi|686400651|dbj|BAP58885.1| MHC class II antigen [Sus scrofa domesticus];>gi|686400649|dbj|BAP58884.1| MHC class II antig	46	1	1	1	4	4	4	28.286	251	251;252;252;252;252;252;252;252;252;252;252;252;252;252;252;252;252;252;252;252;252;252;252;252;252;252;252;252;252;252;252;252;252;252;252;252;252;252;252;252;252;252;252;252;252;253	0.0026882	6.244	161780	17975	439750	1	1				43	964	True	1007	3411	5414	5414
gi|75050024;gi|47522764;gi|10336839;gi|545853818;gi|2058660	gi|75050024;gi|47522764;gi|10336839;gi|545853818	4;4;4;4;1	4;4;4;4;1	4;4;4;4;1	>gi|75050024|sp|Q9GLP0.1|ITB1_PIG RecName: Full=Integrin beta-1; AltName: Full=Fibronectin receptor subunit beta; AltName: Full=VLA-4 subunit beta; AltName: CD_antigen=CD29; Flags: Precursor;>gi|47522764|ref|NP_999133.1| integrin beta-1 precursor [Sus scro	5	4	4	4	5.8	5.8	5.8	88.265	798	798;798;798;801;90	0	23.225	591700	17930	1608400	4	4				29	350;1091;1443;1975	True;True;True;True	363;1140;1501;2067	1399;3818;4916;6667	2220;6115;7877;10531	2220;6115;7877;10531
gi|545849476;gi|5565902	gi|545849476;gi|5565902	9;6	1;1	1;1	>gi|545849476|ref|XP_005667596.1| PREDICTED: apolipoprotein R isoform X1 [Sus scrofa];>gi|5565902|gb|AAD45256.1| apolipoprotein R precursor, partial [Sus scrofa]	2	9	1	1	10.4	1.1	1.1	82.03	733	733;188	1	-2	586930	16304	586930	1	1	+			367	97;236;245;246;1110;1201;1398;1399;1428	False;False;False;False;True;False;False;False;False	100;243;255;256;1159;1252;1453;1454;1484;1485	316;317;1045;1046;1081;1082;1083;1084;1085;1086;1087;1088;1089;3860;4126;4127;4770;4771;4772;4773;4774;4881;4882;4883;4884;4885;4886	583;584;585;1693;1694;1695;1696;1697;1698;1699;1700;1701;1742;1743;1744;1745;1746;1747;1748;1749;1750;1751;1752;1753;1754;1755;1756;1757;1758;1759;1760;1761;1762;1763;1764;1765;1766;1767;1768;6188;6604;6605;6606;6607;6608;6609;6610;6611;7663;7664;7665;7666;7667;7668;7669;7670;7671;7672;7673;7674;7675;7676;7677;7678;7831;7832;7833;7834;7835;7836;7837;7838;7839;7840;7841;7842;7843	585;1693;1751;1768;6188;6608;7664;7674;7834	47	692
gi|545845146	gi|545845146	1	1	1	>gi|545845146|ref|XP_005666753.1| PREDICTED: multifunctional protein ADE2 isoform X3 [Sus scrofa]	1	1	1	1	2.4	2.4	2.4	46.991	425	425	0	7.2977	291220	16179	791610	1	1				364	188	True	195	759	1231	1231
gi|160419232;gi|148223599;gi|123299966;gi|117660969	gi|160419232;gi|148223599;gi|123299966;gi|117660969	1;1;1;1	1;1;1;1	1;1;1;1	>gi|160419232|sp|A1XQU1.2|PSB7_PIG RecName: Full=Proteasome subunit beta type-7; Flags: Precursor;>gi|148223599|ref|NP_001090945.1| proteasome subunit beta type-7 precursor [Sus scrofa];>gi|123299966|dbj|BAF45330.1| proteasome beta 7 subunit proprotein [Su	4	1	1	1	4	4	4	29.98	277	277;277;277;277	0.0026455	6.1912	176580	16053	480010	1	1				57	729	True	764	2535	4041	4041
gi|350590106	gi|350590106	1	1	1	>gi|350590106|ref|XP_003482989.1| PREDICTED: LOW QUALITY PROTEIN: N-sulphoglucosamine sulphohydrolase [Sus scrofa]	1	1	1	1	2.5	2.5	2.5	57.232	512	512	0	7.2483	304900	16047	304900	1	1				271	1568	True	1634	5340	8528	8528
gi|329744607;CON__Q0V8M9	gi|329744607;CON__Q0V8M9	2;1	2;1	2;1	>gi|329744607|ref|NP_001193278.1| inter-alpha-trypsin inhibitor heavy chain H3 precursor [Sus scrofa];>Q0V8M9 TREMBL:Q0V8M9;Q9TRI0 (Bos taurus) similar to inter-alpha (globulin) inhibitor H3 isoform 2	2	2	2	2	2.2	2.2	2.2	99.323	889	889;891	0	11.399	556340	15896	1271100	4	4			+	210	452;629	True;True	473;658	1738;1739;2255;2256	2771;2772;3616;3617	2772;3617
gi|350580885	gi|350580885	2	2	2	>gi|350580885|ref|XP_003123802.3| PREDICTED: thrombospondin-4 [Sus scrofa]	1	2	2	2	2.8	2.8	2.8	97.194	880	880	0	12.733	532870	15225	815900	2	2				260	1647;1756	True;True	1724;1840	5660;5957	8993;9410	8993;9410
gi|545838561	gi|545838561	55	1	0	>gi|545838561|ref|XP_005665867.1| PREDICTED: complement C4 isoform X1 [Sus scrofa]	1	55	1	0	48.1	0.6	0	187.33	1695	1695	0	8.2343	1242700	15155	2452200	2	2				357	45;131;147;218;221;275;321;334;378;446;474;476;481;611;637;641;647;672;685;706;760;846;860;923;930;1008;1124;1234;1316;1327;1335;1451;1458;1467;1522;1533;1598;1654;1831;1876;1922;1954;2014;2054;2057;2148;2195;2260;2284;2308;2316;2331;2347;2403;2452	False;False;False;False;False;False;False;False;False;False;False;False;False;False;False;False;False;False;False;False;False;False;False;False;False;False;False;False;False;False;False;False;False;False;False;False;False;False;False;False;False;False;False;False;False;False;False;False;True;False;False;False;False;False;False	47;136;154;225;228;286;334;347;391;392;467;497;499;504;639;666;670;676;701;716;738;795;885;899;965;972;1053;1175;1285;1370;1381;1389;1509;1516;1526;1586;1598;1669;1731;1918;1964;2013;2046;2107;2147;2151;2244;2293;2359;2385;2409;2417;2432;2450;2507;2558	157;408;409;410;411;662;663;991;1004;1165;1282;1365;1366;1367;1470;1471;1472;1686;1805;1810;1811;1812;1813;1814;1815;1816;1824;1825;1826;1827;1828;1829;2209;2279;2280;2281;2290;2302;2361;2362;2404;2405;2406;2407;2460;2702;2703;2704;2705;3117;3118;3139;3140;3299;3300;3301;3313;3314;3532;3533;3534;3922;3923;4195;4456;4487;4488;4489;4490;4509;4932;4933;4934;4949;4950;4951;4952;4953;4954;4955;4956;49…	319;697;698;699;700;1113;1114;1613;1630;1894;2064;2182;2183;2184;2341;2342;2343;2672;2897;2912;2913;2914;2915;2916;2917;2918;2919;2920;2930;2931;2932;2933;2934;2935;2936;3559;3658;3659;3660;3669;3682;3775;3776;3833;3834;3835;3836;3927;4333;4334;4335;4336;4979;4980;4981;5007;5008;5259;5260;5261;5274;5275;5624;5625;5626;5627;6288;6289;6696;7140;7182;7183;7184;7185;7186;7210;7900;7901;7902;7924;7925…	319;699;1114;1613;1630;1894;2064;2184;2341;2672;2897;2914;2931;3559;3658;3669;3682;3776;3833;3927;4333;4980;5008;5260;5274;5625;6289;6696;7140;7182;7210;7900;7924;7965;8244;8287;8652;9034;9784;10029;10310;10427;10700;11047;11062;11553;11779;12081;12441;12608;12659;12697;12786;13071;13335	40	1126
gi|335300147	gi|335300147	2	2	2	>gi|335300147|ref|XP_003358804.1| PREDICTED: carboxypeptidase N subunit 2 [Sus scrofa]	1	2	2	2	6.9	6.9	6.9	59.94	547	547	0	16.338	363570	15149	988300	2	2				229	1315;1514	True;True	1369;1578	4455;5127	7139;8180	7139;8180
gi|63147973;gi|102695506;gi|89886167;gi|87047650;gi|60203061;gi|262072959;gi|167860506;gi|167860504;gi|167860502;gi|167860500;gi|167860498;gi|167860496;gi|167860494;gi|167860492;gi|167860490;gi|167860488;gi|167860486;gi|167860484;gi|167860482;gi|167860480;gi|167860478;gi|167860476;gi|167860474;gi|166797530;gi|166202127;gi|166202125;gi|166202123;gi|166202121;gi|166202119;gi|166202117;gi|166202115;…	gi|63147973;gi|102695506;gi|89886167;gi|87047650;gi|60203061;gi|262072959;gi|167860506;gi|167860504;gi|167860502;gi|167860500;gi|167860498;gi|167860496;gi|167860494;gi|167860492;gi|167860490;gi|167860488;gi|167860486;gi|167860484;gi|167860482;gi|167860480;gi|167860478;gi|167860476;gi|167860474;gi|166797530;gi|166202127;gi|166202125;gi|166202123;gi|166202121;gi|166202119;gi|166202117;gi|166202115;…	1;1;1;1;1;1;1;1;1;1;1;1;1;1;1;1;1;1;1;1;1;1;1;1;1;1;1;1;1;1;1;1;1;1;1	1;1;1;1;1;1;1;1;1;1;1;1;1;1;1;1;1;1;1;1;1;1;1;1;1;1;1;1;1;1;1;1;1;1;1	1;1;1;1;1;1;1;1;1;1;1;1;1;1;1;1;1;1;1;1;1;1;1;1;1;1;1;1;1;1;1;1;1;1;1	>gi|63147973|gb|AAY34278.1| fatty acid binding protein 5, partial [Sus scrofa];>gi|102695506|gb|ABF71383.1| fatty acid binding protein 5, partial [Sus scrofa];>gi|89886167|ref|NP_001034835.1| fatty acid-binding protein, epidermal [Sus scrofa];>gi|87047650|	35	1	1	1	14.1	14.1	14.1	7.0951	64	64;124;135;135;135;135;135;135;135;135;135;135;135;135;135;135;135;135;135;135;135;135;135;135;135;135;135;135;135;135;135;135;135;135;135	0.0051948	6.0701	59281	14820	161140	1	1				27	667	True	696	2345	3755	3755
gi|545832903	gi|545832903	1	1	1	>gi|545832903|ref|XP_005664916.1| PREDICTED: protein transport protein sec31-like [Sus scrofa]	1	1	1	1	1.3	1.3	1.3	61.367	593	593	1	-2	305450	14545	830300	0	0	+			354	1732	True	1816	5899	9325	9325	143	443
gi|335287827;CON__Q7RTS7;gi|345091038;CON__Q32MB2;gi|89331015;CON__Q14CN4-1;CON__Q6IME9;CON__Q3SY84	gi|335287827;CON__Q7RTS7;gi|345091038;CON__Q32MB2;gi|89331015;CON__Q14CN4-1;CON__Q6IME9;CON__Q3SY84	4;3;3;3;2;2;2;2	1;1;1;1;1;1;1;1	1;1;1;1;1;1;1;1	>gi|335287827|ref|XP_003126223.2| PREDICTED: keratin, type II cytoskeletal 73 [Sus scrofa];>Q7RTS7 SWISS-PROT:Q7RTS7 Tax_Id=9606 Gene_Symbol=KRT74 Keratin, type II cytoskeletal 74;>gi|345091038|ref|NP_001230743.1| keratin 74 [Sus scrofa];>Q32MB2 TREMBL:Q32	8	4	1	1	7.3	2.3	2.3	56.813	518	518;529;531;540;444;511;520;523	0	8.0323	434290	14476	1180500	1	1			+	218	654;698;1273;1396	False;True;False;False	683;729;1326;1451	2314;2315;2439;4356;4357;4358;4359;4766;4767;4768	3695;3696;3697;3698;3699;3700;3701;3885;6972;6973;6974;6975;6976;6977;6978;6979;6980;6981;6982;7658;7659;7660;7661	3696;3885;6976;7660
gi|545890074	gi|545890074	1	1	1	>gi|545890074|ref|XP_003361200.2| PREDICTED: ras suppressor protein 1-like, partial [Sus scrofa]	1	1	1	1	10.4	10.4	10.4	25.788	231	231	0	10.045	172180	14348	468030	1	1				390	1655	True	1732	5691	9036	9036
CON__P04258	CON__P04258	1	1	1	>P04258 SWISS-PROT:P04258 (Bos taurus) Similar to Collagen alpha 1(III) chain	1	1	1	1	1.2	1.2	1.2	138.44	1466	1466	0.0028902	6.7842	856660	13179	2328600	2	2			+	6	809	True	846	2902;2903	4649;4650	4650
gi|350579492	gi|350579492	8	8	8	>gi|350579492|ref|XP_003122123.2| PREDICTED: sushi, von Willebrand factor type A, EGF and pentraxin domain-containing protein 1 [Sus scrofa]	1	8	8	8	3.6	3.6	3.6	389.05	3572	3572	0	50.426	1668100	12931	3433500	11	11				259	494;645;777;802;902;1153;1951;1966	True;True;True;True;True;True;True;True	519;674;813;839;944;1204;2043;2058	1872;2300;2751;2882;2883;2884;3259;3260;3261;3985;6599;6639	3013;3680;4395;4615;4616;4617;5204;5205;5206;6376;10417;10474	3013;3680;4395;4616;5204;6376;10417;10474
gi|545881737;gi|753704406;gi|197251946;gi|195562215	gi|545881737;gi|753704406;gi|197251946;gi|195562215	1;1;1;1	1;1;1;1	1;1;1;1	>gi|545881737|ref|XP_005673156.1| PREDICTED: actin-related protein 3B-like, partial [Sus scrofa];>gi|753704406|gb|JAG69747.1| Actin-related protein 3 [Sus scrofa domesticus];>gi|197251946|ref|NP_001127815.1| actin-related protein 3 [Sus scrofa];>gi|1955622	4	1	1	1	2.7	2.7	2.7	46.329	404	404;418;418;418	0	14.221	235010	12369	520670	4	4				140	348	True	361	1394;1395;1396;1397	2215;2216;2217;2218	2217
gi|545841359;gi|55741486;gi|1698895;gi|125987844;gi|12060489	gi|545841359;gi|55741486;gi|1698895;gi|125987844;gi|12060489	1;1;1;1;1	1;1;1;1;1	1;1;1;1;1	>gi|545841359|ref|XP_005674565.1| PREDICTED: LOW QUALITY PROTEIN: myosin, heavy chain 6, cardiac muscle, alpha [Sus scrofa];>gi|55741486|ref|NP_999020.1| myosin-7 [Sus scrofa];>gi|1698895|gb|AAB37320.1| beta-myosin heavy chain [Sus scrofa];>gi|125987844|sp	5	1	1	1	0.7	0.7	0.7	205.77	1783	1783;1935;1935;1935;1935	1	-2	1127300	12253	1127300	0	0	+			73	550	True	576	2044	3263	3263	33	723
gi|545845509;gi|545886507;gi|311276873;gi|545886499;gi|545845506;gi|311276869;gi|311262396;gi|545845503;gi|545845501;gi|545845499;gi|545845497;gi|545886502	gi|545845509;gi|545886507;gi|311276873;gi|545886499;gi|545845506;gi|311276869;gi|311262396;gi|545845503;gi|545845501;gi|545845499;gi|545845497;gi|545886502	1;1;1;1;1;1;1;1;1;1;1;1	1;1;1;1;1;1;1;1;1;1;1;1	1;1;1;1;1;1;1;1;1;1;1;1	>gi|545845509|ref|XP_005666843.1| PREDICTED: septin-11 isoform X7 [Sus scrofa];>gi|545886507|ref|XP_005673925.1| PREDICTED: septin-6 isoform X5 [Sus scrofa];>gi|311276873|ref|XP_003135392.1| PREDICTED: septin-6 isoformX1 [Sus scrofa];>gi|545886499|ref|XP_0	12	1	1	1	2.6	2.6	2.6	48.964	425	425;427;427;429;429;429;429;431;431;432;432;434	0.0027778	6.4456	227530	11975	618480	1	1				195	2055	True	2148	6967	11051	11051
gi|1364248;gi|24987288;gi|21730305;gi|47523720;gi|2043;gi|120742;gi|225994	gi|1364248;gi|24987288;gi|21730305;gi|47523720;gi|2043;gi|120742;gi|225994	2;2;2;2;2;2;1	2;2;2;2;2;2;1	2;2;2;2;2;2;1	>gi|1364248|emb|CAA82246.1| glucosephosphate isomerase [Sus scrofa];>gi|24987288|pdb|1GZV|A Chain A, The Crystal Structure Of Phosphoglucose Isomerase From Pig Muscle Complexed With 5-Phosphoarabinonate;>gi|21730305|pdb|1GZD|A Chain A, Crystal Structure Of	7	2	2	2	5.6	5.6	5.6	62.037	553	553;557;557;558;558;558;558	0	17.169	285850	11910	619630	3	3				74	1120;1671	True;True	1170;1748	3895;3896;5720	6240;6241;9080	6241;9080
gi|297747302	gi|297747302	1	1	1	>gi|297747302|ref|NP_001172115.1| aspartyl aminopeptidase [Sus scrofa]	1	1	1	1	5.9	5.9	5.9	52.325	475	475	0.005168	6.0411	249960	11903	679470	1	1				180	1717	True	1799	5848	9250	9250
gi|545839928;gi|346986428	gi|545839928;gi|346986428	3;3	1;1	1;1	>gi|545839928|ref|XP_005666120.1| PREDICTED: heat shock 90kD protein 1, beta isoform X1 [Sus scrofa];>gi|346986428|ref|NP_001231362.1| heat shock 90kD protein 1, beta [Sus scrofa]	2	3	1	1	5.4	1.8	1.8	83.252	724	724;724	0.002849	6.6886	403020	11515	1095500	1	1				249	28;965;2183	False;False;True	29;1008;2279	119;3412;7375	268;5415;11712	268;5415;11712
gi|758306;gi|164472;gi|121118;CON__Q3SX14	gi|758306;gi|164472;gi|121118;CON__Q3SX14	2;2;2;1	2;2;2;1	2;2;2;1	>gi|758306|emb|CAA32077.1| gelsolin, partial [Sus scrofa];>gi|164472|gb|AAA31042.1| plasma gelsolin precursor, partial [Sus scrofa];>gi|121118|sp|P20305.1|GELS_PIG RecName: Full=Gelsolin; AltName: Full=Actin-depolymerizing factor; Short=ADF; AltName: Full=	4	2	2	2	3.4	3.4	3.4	84.774	772	772;772;772;781	0	12.823	377790	11448	1026900	3	3			+	75	417;1042	True;True	435;1090	1591;3698	2521;2522;5916	2521;5916
gi|545847157;gi|545847155;gi|335294263	gi|545847157;gi|545847155;gi|335294263	1;1;1	1;1;1	1;1;1	>gi|545847157|ref|XP_005656654.1| PREDICTED: integrin-linked protein kinase isoform X3 [Sus scrofa];>gi|545847155|ref|XP_005656653.1| PREDICTED: integrin-linked protein kinase isoform X2 [Sus scrofa];>gi|335294263|ref|XP_003357179.1| PREDICTED: integrin-li	3	1	1	1	2.2	2.2	2.2	51.421	452	452;452;452	0.0026178	6.1634	270800	11284	736120	2	2				226	658	True	687	2321;2322	3707;3708	3707
CON__Q5D862;gi|545823054	CON__Q5D862;gi|545823054	4;2	4;2	4;2	>Q5D862 SWISS-PROT:Q5D862 Tax_Id=9606 Gene_Symbol=FLG2 Filaggrin-2;>gi|545823054|ref|XP_005663490.1| PREDICTED: filaggrin-2-like [Sus scrofa]	2	4	4	4	2.1	2.1	2.1	248.07	2391	2391;1139	0	24.154	768920	11144	1395800	5	5			+	21	737;1683;1738;2072	True;True;True;True	772;1762;1822;2166	2558;2559;5748;5913;7071	4085;4086;9113;9347;11222	4086;9113;9347;11222
gi|545823036	gi|545823036	1	1	1	>gi|545823036|ref|XP_005663485.1| PREDICTED: LOW QUALITY PROTEIN: keratinocyte proline-rich protein-like [Sus scrofa]	1	1	1	1	2.2	2.2	2.2	58.933	540	540	0	8.3117	175310	10957	476550	1	1				348	1851	True	1938	6277	9891	9891
gi|545821012	gi|545821012	1	1	1	>gi|545821012|ref|XP_005663033.1| PREDICTED: LOW QUALITY PROTEIN: protein CBFA2T1 [Sus scrofa]	1	1	1	1	2.7	2.7	2.7	73.943	662	662	1	-2	357930	10846	357930	1	1	+			344	1695	True	1775	5786	9166	9166	139;140	388;398
gi|223634469;gi|221327934;gi|197725942;gi|545808472;gi|545808470;gi|238018148;gi|238018146;gi|237652191;gi|237638742;gi|212725657;gi|209867518;gi|545808468;gi|545808466;gi|545808464;gi|545808462;gi|545808460	gi|223634469;gi|221327934;gi|197725942;gi|545808472;gi|545808470;gi|238018148;gi|238018146;gi|237652191;gi|237638742;gi|212725657;gi|209867518;gi|545808468;gi|545808466;gi|545808464;gi|545808462;gi|545808460	1;1;1;1;1;1;1;1;1;1;1;1;1;1;1;1	1;1;1;1;1;1;1;1;1;1;1;1;1;1;1;1	1;1;1;1;1;1;1;1;1;1;1;1;1;1;1;1	>gi|223634469|ref|NP_001138693.1| ADP-ribosylation factor 5 [Sus scrofa];>gi|221327934|gb|ACM17703.1| ADP-ribosylation factor 5 [Sus scrofa];>gi|197725942|gb|ACH73157.1| ADP-ribosylation factor 5 [Sus scrofa];>gi|545808472|ref|XP_005661199.1| PREDICTED: AD	16	1	1	1	5.6	5.6	5.6	20.529	180	180;180;180;181;181;181;181;181;181;181;181;185;185;217;222;226	0.0027624	6.4369	116170	10561	315780	1	1				144	292	True	303	1208	1950	1950
gi|350579465;gi|545803946	gi|350579465;gi|545803946	1;1	1;1	1;1	>gi|350579465|ref|XP_003480615.1| PREDICTED: choline transporter-like protein 1 isoformX2 [Sus scrofa];>gi|545803946|ref|XP_005660369.1| PREDICTED: choline transporter-like protein 1 isoform X3 [Sus scrofa]	2	1	1	1	2.6	2.6	2.6	73.073	657	657;719	0.0026316	6.1708	314160	10472	853970	2	2				258	648	True	677	2303;2304	3683;3684	3683
gi|172072659;gi|122144690;gi|106647506	gi|172072659;gi|122144690;gi|106647506	1;1;1	1;1;1	1;1;1	>gi|172072659|ref|NP_001116457.1| prothrombin precursor [Sus scrofa];>gi|122144690|sp|Q19AZ8.1|THRB_PIG RecName: Full=Prothrombin; AltName: Full=Coagulation factor II; Contains: RecName: Full=Activation peptide fragment 1; Contains: RecName: Full=Activatio	3	1	1	1	4	4	4	70.065	623	623;623;623	0.0027174	6.3086	292800	10457	795900	1	1				33	621	True	649	2227	3578	3578
CON__P02769	CON__P02769	9	1	1	>P02769 SWISS-PROT:P02769 (Bos taurus) Bovine serum albumin precursor	1	9	1	1	13.8	2.1	2.1	69.293	607	607	0	7.8323	438980	10452	438980	1	1			+	5	232;287;472;473;1288;1342;1379;1811;2599	False;True;False;False;False;False;False;False;False	239;298;495;496;1341;1396;1434;1896;2714	1035;1036;1037;1038;1198;1795;1796;1797;1798;1799;1800;1801;1802;1803;1804;4394;4395;4396;4527;4528;4529;4530;4715;4716;4717;4718;4719;6129;6130;6131;6132;8973;8974;8975;8976	1671;1672;1673;1674;1675;1676;1677;1678;1940;2882;2883;2884;2885;2886;2887;2888;2889;2890;2891;2892;2893;2894;2895;2896;7052;7053;7054;7055;7056;7232;7233;7234;7235;7236;7237;7238;7239;7240;7241;7242;7243;7581;7582;7583;7584;7585;7586;7587;9669;9670;9671;9672;9673;9674;9675;9676;9677;9678;9679;9680;14388;14389;14390;14391;14392;14393	1673;1940;2882;2889;7056;7241;7585;9674;14389
gi|545808828;gi|545808826;gi|54039746;gi|47523730;gi|3661527;gi|262263207	gi|545808828;gi|545808826;gi|54039746;gi|47523730;gi|3661527;gi|262263207	2;2;2;2;2;2	2;2;2;2;2;2	1;1;1;1;1;1	>gi|545808828|ref|XP_005661258.1| PREDICTED: tropomyosin alpha-4 chain isoform X4 [Sus scrofa];>gi|545808826|ref|XP_005661257.1| PREDICTED: tropomyosin alpha-4 chain isoform X3 [Sus scrofa];>gi|54039746|sp|P67937.3|TPM4_PIG RecName: Full=Tropomyosin alpha-	6	2	2	1	7.9	7.9	4.4	25.923	227	227;248;248;248;248;248	0	11.472	152940	10196	415730	2	2				175	42;992	True;True	44;1036	151;3474	305;5522	305;5522
gi|350592981;CON__Q2KJ83	gi|350592981;CON__Q2KJ83	2;1	2;1	2;1	>gi|350592981|ref|XP_003483585.1| PREDICTED: carboxypeptidase N catalytic chain [Sus scrofa];>Q2KJ83 TREMBL:Q2KJ83 (Bos taurus) Similar to Carboxypeptidase N catalytic chain	2	2	2	2	5.6	5.6	5.6	52.386	461	461;462	0	11.298	203350	10167	513080	6	6			+	277	466;1018	True;True	489;1064	1775;3609;3610;3611	2834;5757;5758;5759;5760;5761	2834;5761
gi|270289746;gi|262411071	gi|270289746;gi|262411071	8;8	8;8	8;8	>gi|270289746|ref|NP_001161890.1| thyroglobulin precursor [Sus scrofa];>gi|262411071|gb|ACY66900.1| thyroglobulin [Sus scrofa]	2	8	8	8	4.3	4.3	4.3	293.25	2692	2692;2692	0	51.227	1174800	10041	3193500	8	8				176	166;183;1276;1293;1634;2259;2274;2604	True;True;True;True;True;True;True;True	173;190;1329;1346;1710;2358;2373;2720	712;747;4364;4412;5619;7618;7791;9005	1173;1214;6995;7087;8938;12080;12380;14432	1173;1214;6995;7087;8938;12080;12380;14432
gi|545822902;gi|545822900;gi|545822890;gi|48675927;gi|45272586;gi|545822874;gi|545822866;gi|545822898;gi|545822896;gi|80975533;gi|753702952;gi|545822894;gi|545822892;gi|545822888;gi|545822886;gi|545822884;gi|545822882;gi|545822880;gi|545822878;gi|545822876;gi|545822872;gi|545822870;gi|545822868;gi|545808824;gi|545808822;gi|148841204;gi|117661186	gi|545822902;gi|545822900;gi|545822890;gi|48675927;gi|45272586;gi|545822874;gi|545822866;gi|545822898;gi|545822896;gi|80975533;gi|753702952;gi|545822894;gi|545822892;gi|545822888;gi|545822886;gi|545822884;gi|545822882;gi|545822880;gi|545822878;gi|545822876;gi|545822872;gi|545822870;gi|545822868;gi|545808824;gi|545808822;gi|148841204;gi|117661186	2;2;2;2;2;2;2;1;1;1;1;1;1;1;1;1;1;1;1;1;1;1;1;1;1;1;1	1;1;1;1;1;1;1;0;0;0;0;0;0;0;0;0;0;0;0;0;0;0;0;0;0;0;0	1;1;1;1;1;1;1;0;0;0;0;0;0;0;0;0;0;0;0;0;0;0;0;0;0;0;0	>gi|545822902|ref|XP_005663433.1| PREDICTED: tropomyosin alpha-3 chain isoform X19 [Sus scrofa];>gi|545822900|ref|XP_005663432.1| PREDICTED: tropomyosin alpha-3 chain isoform X18 [Sus scrofa];>gi|545822890|ref|XP_005663427.1| PREDICTED: tropomyosin alpha-3	27	2	1	1	11	6.6	6.6	21.263	182	182;227;248;248;248;284;284;247;247;248;248;248;248;248;248;248;283;283;284;284;284;284;284;284;284;284;284	0.0052083	6.0715	109180	9925.4	296780	1	1				325	992;1582	False;True	1036;1650	3474;5370	5522;8571	5522;8571
gi|545841324	gi|545841324	1	1	1	>gi|545841324|ref|XP_005666307.1| PREDICTED: LOW QUALITY PROTEIN: leukotriene B4 receptor 1 [Sus scrofa]	1	1	1	1	3.4	3.4	3.4	41.197	386	386	0.0026525	6.1916	125650	9665.7	341560	1	1				361	1397	True	1452	4769	7662	7662
gi|335292522	gi|335292522	1	1	1	>gi|335292522|ref|XP_001924480.2| PREDICTED: proteasome subunit beta type-5 [Sus scrofa]	1	1	1	1	4.4	4.4	4.4	30.16	275	275	0	7.0282	147670	9229.3	401400	1	1				222	2451	True	2557	8348	13334	13334
CON__Q14525;CON__Q9UE12;CON__Q15323	CON__Q14525;CON__Q9UE12;CON__Q15323	2;2;2	1;1;1	1;1;1	>Q14525 SWISS-PROT:Q14525 Keratin, type I cuticular HA3-II (Hair keratin, type I HA3-II);>Q9UE12 TREMBL:Q9UE12 Type I hair keratin 1 - Homo sapiens (Human).;>Q15323 SWISS-PROT:Q15323 Keratin, type I cuticular HA1 (Hair keratin, type I HA1)	3	2	1	1	7.4	5.7	5.7	46.213	404	404;416;416	0	10.266	215010	8269.6	584450	1	1			+	17	1265;2616	False;True	1317;2732	4328;4329;4330;4331;9041	6912;6913;6914;6915;6916;6917;6918;6919;6920;6921;6922;6923;14493	6915;14493
gi|545870745;gi|545870743;gi|417515878;gi|194042189	gi|545870745;gi|545870743;gi|417515878;gi|194042189	1;1;1;1	1;1;1;1	1;1;1;1	>gi|545870745|ref|XP_005671204.1| PREDICTED: annexin A11 isoform X3 [Sus scrofa];>gi|545870743|ref|XP_005671203.1| PREDICTED: annexin A11 isoform X2 [Sus scrofa];>gi|417515878|gb|JAA53744.1| annexin A11 [Sus scrofa];>gi|194042189|ref|XP_001924213.1| PREDIC	4	1	1	1	4	4	4	41.094	372	372;412;502;502	0.0026954	6.2599	156760	8250.3	426110	1	1				137	573	True	601	2091	3318	3318
gi|545839943;gi|545839940;gi|545839937;gi|545839934;gi|545839931	gi|545839943;gi|545839940;gi|545839937;gi|545839934;gi|545839931	1;1;1;1;1	1;1;1;1;1	1;1;1;1;1	>gi|545839943|ref|XP_005666124.1| PREDICTED: equilibrative nucleoside transporter 1 isoform X5 [Sus scrofa];>gi|545839940|ref|XP_005666123.1| PREDICTED: equilibrative nucleoside transporter 1 isoform X4 [Sus scrofa];>gi|545839937|ref|XP_005666122.1| PREDIC	5	1	1	1	2.5	2.5	2.5	51.681	473	473;473;473;483;492	0.0026385	6.1819	114750	8196.5	199170	2	2				358	413	True	431	1582;1583	2508;2509	2509
gi|545809536	gi|545809536	3	3	3	>gi|545809536|ref|XP_005654909.1| PREDICTED: complement C3-like [Sus scrofa]	1	3	3	3	2.1	2.1	2.1	186.51	1660	1660	0	18.161	627640	8151.2	1706100	5	5				339	227;555;610	True;True;True	234;581;638	1016;2050;2051;2208	1643;1644;3269;3270;3558	1643;3270;3558
gi|106073338;gi|300119711	gi|106073338;gi|300119711	17;16	1;0	1;0	>gi|106073338|gb|ABF81978.1| muscle glycogen phosphorylase, partial [Sus scrofa];>gi|300119711|gb|ABF81977.2| muscle glycogen phosphorylase [Sus scrofa]	2	17	1	1	34.3	1.9	1.9	84.035	731	731;842	0	7.6021	339490	7544.1	922820	1	1				30	173;325;995;1010;1089;1172;1264;1377;1384;1603;2326;2370;2376;2407;2519;2521;2536	False;False;True;False;False;False;False;False;False;False;False;False;False;False;False;False;False	180;338;1039;1055;1138;1223;1316;1432;1439;1675;2427;2473;2479;2512;2630;2632;2647	729;730;731;1348;3478;3536;3537;3816;4044;4326;4327;4712;4733;5435;7966;8100;8109;8222;8671;8672;8674;8723	1195;1196;1197;2158;5526;5629;5630;6113;6475;6910;6911;7577;7610;8668;12682;12888;12898;13094;13901;13902;13904;13992	1197;2158;5526;5629;6113;6475;6911;7577;7610;8668;12682;12888;12898;13094;13902;13904;13992
gi|311258421	gi|311258421	1	1	1	>gi|311258421|ref|XP_003127605.1| PREDICTED: 6-phosphogluconate dehydrogenase, decarboxylating [Sus scrofa]	1	1	1	1	2.1	2.1	2.1	53.226	483	483	0	8.5012	171190	7443.2	465350	1	1				191	1969	True	2061	6654	10503	10503
gi|355390262;gi|86604379	gi|355390262;gi|86604379	1;1	1;1	1;1	>gi|355390262|ref|NP_001090920.2| complement component C8 beta chain precursor [Sus scrofa];>gi|86604379|gb|ABD13969.1| complement component C8B [Sus scrofa]	2	1	1	1	3.4	3.4	3.4	66.597	590	590;611	0	7.589	229210	7162.9	623070	2	2				284	48	True	50	162;163	324;325	325
CON__Q28107	CON__Q28107	6	1	1	>Q28107 SWISS-PROT:Q28107 (Bos taurus) Coagulation factor V precursor	1	6	1	1	2.9	0.6	0.6	248.98	2211	2211	0	9.5142	620090	7127.5	1090500	5	5			+	18	50;139;354;1361;1635;2410	False;False;True;False;False;False	52;146;367;1415;1711;2515	170;436;1403;1404;1405;1406;1407;4568;5620;5621;5622;8227;8228;8229	336;734;2224;2225;2226;2227;2228;7300;8939;8940;8941;13099;13100;13101	336;734;2224;7300;8939;13101
gi|6919844;gi|545812348	gi|6919844;gi|545812348	1;1	1;1	1;1	>gi|6919844|sp|O11780.1|BGH3_PIG RecName: Full=Transforming growth factor-beta-induced protein ig-h3; Short=Beta ig-h3; AltName: Full=Kerato-epithelin; AltName: Full=RGD-containing collagen-associated protein; Short=RGD-CAP; Flags: Precursor;>gi|545812348|	2	1	1	1	3.4	3.4	3.4	74.461	683	683;725	0	13.455	220810	7122.8	600210	1	1				340	2379	True	2482	8112	12901	12901
gi|311275507	gi|311275507	1	1	1	>gi|311275507|ref|XP_003134773.1| PREDICTED: neural Wiskott-Aldrich syndrome protein [Sus scrofa]	1	1	1	1	1.6	1.6	1.6	54.641	505	505	0.0028409	6.5952	137060	6230.2	372580	2	2				205	7	True	7	15;16	22;23	23
CON__Q9NSB2;CON__Q6ISB0;CON__O43790;CON__Q6NT21;CON__P78385;gi|311255371;CON__Q14533;gi|311255377;CON__P78386;gi|311255373;CON__Q9NSB4;gi|545825409;gi|545825244	CON__Q9NSB2;CON__Q6ISB0;CON__O43790;CON__Q6NT21;CON__P78385;gi|311255371;CON__Q14533;gi|311255377;CON__P78386	3;3;2;2;2;2;2;2;2;1;1;1;1	1;1;1;1;1;1;1;1;1;1;1;1;1	1;1;1;1;1;1;1;1;1;1;1;1;1	>Q9NSB2 SWISS-PROT:Q9NSB2 Keratin, type II cuticular Hb4 (Hair keratin, type II Hb4) - Homo sapiens (Human).;>Q6ISB0 TREMBL:Q6ISB0 Keratin, hair, basic, 4 - Homo sapiens (Human).;>O43790 SWISS-PROT:O43790 Keratin, type II cuticular Hb6 (Hair keratin, type	13	3	1	1	4.2	1.8	1.8	64.895	600	600;600;486;493;493;497;505;507;507;493;513;514;514	0.0028011	6.5237	228180	6166.9	620250	1	1			+	22	654;697;1347	False;False;True	683;728;1401	2314;2315;2438;4544	3695;3696;3697;3698;3699;3700;3701;3884;7271	3696;3884;7271
gi|545863801	gi|545863801	1	1	1	>gi|545863801|ref|XP_003483277.2| PREDICTED: fibulin-2-like, partial [Sus scrofa]	1	1	1	1	2.2	2.2	2.2	61.284	549	549	0	7.2327	162710	5810.9	162710	1	1				375	979	True	1023	3446	5478	5478
gi|727173;gi|164370	gi|727173;gi|164370	48;48	1;1	1;1	>gi|727173|gb|AAA64300.1| apolipoprotein B, partial [Sus scrofa];>gi|164370|gb|AAA30997.1| apolipoprotein B, partial [Sus scrofa]	2	48	1	1	36	1	1	174.66	1540	1540;1540	1	-2	417990	5428.5	1136200	1	1	+			110	99;120;143;169;185;191;192;347;357;372;562;575;639;710;743;1032;1103;1193;1211;1230;1237;1282;1313;1385;1506;1518;1589;1644;1648;1670;1713;1805;1965;1992;2007;2008;2073;2265;2280;2311;2320;2437;2501;2552;2582;2585;2609;2632	False;False;False;False;False;False;False;False;False;False;True;False;False;False;False;False;False;False;False;False;False;False;False;False;False;False;False;False;False;False;False;False;False;False;False;False;False;False;False;False;False;False;False;False;False;False;False;False	102;125;150;176;192;198;199;360;370;385;589;603;668;742;743;778;1080;1152;1244;1262;1281;1288;1335;1366;1367;1440;1566;1567;1582;1658;1721;1725;1747;1795;1890;2057;2085;2100;2101;2167;2364;2381;2412;2421;2543;2611;2665;2697;2700;2725;2750	320;321;322;323;384;385;444;445;446;447;448;449;450;451;715;716;717;754;768;769;770;771;772;773;774;1393;1412;1413;1414;1415;1449;1450;2065;2095;2096;2097;2286;2466;2467;2468;2469;2470;2574;2575;2576;2577;2578;2579;2580;3661;3662;3663;3664;3665;3666;3837;3838;3839;4108;4109;4110;4147;4189;4198;4199;4200;4375;4376;4450;4451;4452;4734;4735;4736;5105;5106;5107;5137;5138;5388;5389;5390;5391;5648;5649…	589;590;591;592;593;594;595;672;673;742;743;744;745;746;747;748;749;750;1176;1177;1178;1179;1226;1242;1243;1244;1245;1246;1247;1248;1249;1250;2214;2234;2235;2236;2237;2238;2239;2240;2241;2307;2308;3285;3323;3324;3325;3665;3934;3935;3936;3937;3938;3939;4106;4107;4108;4109;4110;4111;4112;4113;4114;4115;5837;5838;5839;5840;5841;5842;5843;5844;5845;5846;5847;5848;5849;5850;6134;6135;6136;6137;6138;65…	589;673;746;1177;1226;1242;1245;2214;2235;2307;3285;3325;3665;3936;4112;5845;6135;6586;6633;6688;6700;7013;7135;7615;8153;8196;8600;8977;9000;9079;9242;9638;10470;10617;10674;10681;11223;12105;12401;12620;12673;13279;13815;14181;14300;14336;14449;14641	48;49;50;51	354;372;460;1215
gi|335302943	gi|335302943	1	1	1	>gi|335302943|ref|XP_003133505.2| PREDICTED: bile salt export pump [Sus scrofa]	1	1	1	1	0.7	0.7	0.7	148.69	1343	1343	1	-2	340350	5317.9	340350	0	0	+			230	1584	True	1652	5378	8580	8580	103;104	924;926
gi|160425381;gi|160425380;gi|62529273;gi|160425379;gi|39545760;gi|164407;gi|124109;gi|160425377;gi|160425378;gi|160425375;gi|160425376;gi|47522950;gi|44990121;gi|164401	gi|160425381;gi|160425380;gi|62529273;gi|160425379;gi|39545760;gi|164407;gi|124109;gi|160425377;gi|160425378;gi|160425375;gi|160425376;gi|47522950;gi|44990121;gi|164401	2;2;2;2;2;2;2;2;2;2;2;2;2;1	2;2;2;2;2;2;2;2;2;2;2;2;2;1	2;2;2;2;2;2;2;2;2;2;2;2;2;1	>gi|160425381|gb|ABX39535.1| calpastatin [Sus scrofa];>gi|160425380|gb|ABX39534.1| calpastatin [Sus scrofa];>gi|62529273|gb|AAX84942.1| type III calpastatin [Sus scrofa];>gi|160425379|gb|ABX39533.1| calpastatin [Sus scrofa];>gi|39545760|gb|AAR27961.1| calp	14	2	2	2	9.1	9.1	9.1	30.947	285	285;433;691;691;713;713;713;753;759;774;775;781;781;251	0	11.148	47248	5249.8	128430	2	2				81	268;460	True;True	279;483	1144;1764	1846;2822	1846;2822
gi|545859339;gi|345441771	gi|545859339;gi|345441771	1;1	1;1	1;1	>gi|545859339|ref|XP_005657046.1| PREDICTED: aldolase C, fructose-bisphosphate isoform X1 [Sus scrofa];>gi|345441771|ref|NP_001230857.1| aldolase C, fructose-bisphosphate [Sus scrofa]	2	1	1	1	4.1	4.1	4.1	39.376	364	364;364	0.0026247	6.17	115410	5245.7	313710	1	1				242	2614	True	2730	9031	14478	14478
gi|83287813;gi|47523958;gi|46452257	gi|83287813;gi|47523958;gi|46452257	1;1;1	1;1;1	1;1;1	>gi|83287813|sp|Q6PQZ1.3|AQP1_PIG RecName: Full=Aquaporin-1; Short=AQP-1; AltName: Full=Aquaporin-CHIP; AltName: Full=Water channel protein for red blood cells and kidney proximal tubule;>gi|47523958|ref|NP_999619.1| aquaporin-1 [Sus scrofa];>gi|46452257|g	3	1	1	1	4.8	4.8	4.8	28.679	271	271;271;271	0	7.2656	17764	4440.9	48287	1	1				327	1679	True	1758	5743	9108	9108
gi|545813611;gi|350581487;gi|194043292;gi|90811815;gi|460417876;gi|113205700	gi|545813611;gi|350581487;gi|194043292;gi|90811815;gi|460417876;gi|113205700	4;4;3;2;2;2	2;2;1;0;0;0	2;2;1;0;0;0	>gi|545813611|ref|XP_005662019.1| PREDICTED: 14-3-3 protein gamma isoform X2 [Sus scrofa];>gi|350581487|ref|XP_003124444.3| PREDICTED: 14-3-3 protein gamma isoform X1 [Sus scrofa];>gi|194043292|ref|XP_001928111.1| PREDICTED: 14-3-3 protein eta [Sus scrofa]	6	4	2	2	18.6	11.7	11.7	28.302	247	247;247;246;248;248;248	0	11.267	61649	3853	167580	2	2				263	419;531;1269;2088	False;True;False;True	437;438;556;1322;2182	1596;1597;1598;1599;1600;1974;4343;4344;4345;7105	2528;2529;2530;2531;2532;2533;3163;6938;6939;6940;6941;6942;6943;11280	2528;3163;6940;11280	110	223
gi|545889110;gi|335281552;gi|545806543	gi|545889110;gi|335281552;gi|545806543	2;2;2	2;2;2	2;2;2	>gi|545889110|ref|XP_005674227.1| PREDICTED: EH domain-containing protein 3 [Sus scrofa];>gi|335281552|ref|XP_003122601.2| PREDICTED: EH domain-containing protein 1 isoform X1 [Sus scrofa];>gi|545806543|ref|XP_005660782.1| PREDICTED: EH domain-containing p	3	2	2	2	3.7	3.7	3.7	57.127	507	507;534;551	0	11.605	95803	3548.3	260420	2	2				213	346;1292	True;True	359;1345	1392;4411	2213;7086	2213;7086
gi|86604375;gi|148226535	gi|86604375;gi|148226535	2;2	2;2	2;2	>gi|86604375|gb|ABD13967.1| complement component C6 [Sus scrofa];>gi|148226535|ref|NP_001090918.1| complement component C6 precursor [Sus scrofa]	2	2	2	2	3	3	3	105.27	935	935;935	0	15.325	152730	3182	415170	2	2				94	369;576	True;True	382;604	1440;2098	2293;3326	2293;3326
gi|198443144;gi|198443143;gi|198443142;gi|198443141;gi|153792600;gi|148733529;gi|61676044;gi|61744020;gi|545856272	gi|198443144;gi|198443143;gi|198443142;gi|198443141;gi|153792600;gi|148733529;gi|61676044;gi|61744020	3;3;3;3;3;3;2;2;1	3;3;3;3;3;3;2;2;1	3;3;3;3;3;3;2;2;1	>gi|198443144|pdb|2VZ9|B Chain B, Crystal Structure Of Mammalian Fatty Acid Synthase In Complex With Nadp;>gi|198443143|pdb|2VZ9|A Chain A, Crystal Structure Of Mammalian Fatty Acid Synthase In Complex With Nadp;>gi|198443142|pdb|2VZ8|B Chain B, Crystal St	9	3	3	3	1.7	1.7	1.7	272.25	2512	2512;2512;2512;2512;2512;2512;2316;2411;669	0	22.362	341750	2997.8	928970	3	3				96	353;491;1570	True;True;True	366;516;1636	1402;1868;5347	2223;3009;8536	2223;3009;8536
gi|753703908;gi|545835213	gi|753703908;gi|545835213	1;1	1;1	1;1	>gi|753703908|gb|JAG69565.1| elastin microfibril interfacer 2 [Sus scrofa domesticus];>gi|545835213|ref|XP_005665358.1| PREDICTED: EMILIN-2 [Sus scrofa]	2	1	1	1	2.2	2.2	2.2	108.96	1000	1000;1023	0	8.4497	155670	2937.1	155670	1	1				355	1707	True	1789	5825	9217	9217
gi|1915956;gi|565283;gi|47522638;gi|3024032	gi|1915956;gi|565283;gi|47522638;gi|3024032	1;1;1;1	1;1;1;1	1;1;1;1	>gi|1915956|emb|CAA72309.1| inter-alpha-inhibitor heavy-chain 1, partial [Sus scrofa];>gi|565283|dbj|BAA07632.1| inter-alpha-trypsin inhibitor heavy-chain H1 [Sus scrofa];>gi|47522638|ref|NP_999089.1| inter-alpha-trypsin inhibitor heavy chain H1 precursor	4	1	1	1	1.5	1.5	1.5	86.92	779	779;902;902;902	0.0026738	6.2322	96583	2682.9	262540	1	1				131	33	True	35	134	285	285
gi|545813950;gi|545813947;gi|545813944	gi|545813950;gi|545813947;gi|545813944	1;1;1	1;1;1	1;1;1	>gi|545813950|ref|XP_005662077.1| PREDICTED: T-complex protein 1 subunit zeta-like isoform X3 [Sus scrofa];>gi|545813947|ref|XP_005662076.1| PREDICTED: T-complex protein 1 subunit zeta-like isoform X2 [Sus scrofa];>gi|545813944|ref|XP_005662075.1| PREDICTE	3	1	1	1	4.3	4.3	4.3	53.234	486	486;494;531	0	8.4637	60165	2506.9	163550	1	1				342	2358	True	2461	8072	12848	12848
gi|385862179	gi|385862179	1	1	1	>gi|385862179|ref|NP_001245364.1| protein diaphanous homolog 1 [Sus scrofa]	1	1	1	1	0.9	0.9	0.9	137.48	1237	1237	0.0027473	6.4163	138020	2262.7	375190	1	1				291	1350	True	1404	4547	7274	7274
gi|545864333;gi|406647880	gi|545864333;gi|406647880	4;4	1;1	1;1	>gi|545864333|ref|XP_005652458.1| PREDICTED: ceruloplasmin isoform X1 [Sus scrofa];>gi|406647880|ref|NP_001254623.2| ceruloplasmin precursor [Sus scrofa]	2	4	1	1	4.9	2.2	2.2	120.67	1053	1053;1065	0.0029412	6.9091	111200	2180.4	302270	1	1				293	67;136;341;856	False;False;False;True	70;142;354;895	223;224;425;1384;1385;1386;1387;3135	446;447;717;2204;2205;2206;2207;5003	446;717;2206;5003
gi|281427370;gi|262036937	gi|281427370;gi|262036937	1;1	1;1	1;1	>gi|281427370|ref|NP_001163993.1| T-complex protein 1 subunit eta [Sus scrofa];>gi|262036937|dbj|BAI47603.1| chaperonin containing TCP1, subunit 7 (eta) [Sus scrofa]	2	1	1	1	4.1	4.1	4.1	59.473	543	543;543	0.0028571	6.6907	67376	2173.4	183150	1	1				172	1133	True	1184	3943	6314	6314
gi|545871454;gi|545871452;gi|545871450;gi|545871448;gi|545871446;gi|545871444;gi|545871442;gi|545871440;gi|545871438;gi|545871436;gi|545871434;gi|545871432;gi|545871430;gi|545871428;gi|545871426;gi|545871424;gi|545871422;gi|545871420	gi|545871454;gi|545871452;gi|545871450;gi|545871448;gi|545871446;gi|545871444;gi|545871442;gi|545871440;gi|545871438;gi|545871436;gi|545871434;gi|545871432;gi|545871430;gi|545871428;gi|545871426;gi|545871424;gi|545871422;gi|545871420	2;2;2;2;2;2;2;2;2;2;2;2;2;2;2;2;2;2	2;2;2;2;2;2;2;2;2;2;2;2;2;2;2;2;2;2	2;2;2;2;2;2;2;2;2;2;2;2;2;2;2;2;2;2	>gi|545871454|ref|XP_005671414.1| PREDICTED: zinc finger protein 518A isoform X18 [Sus scrofa];>gi|545871452|ref|XP_005671413.1| PREDICTED: zinc finger protein 518A isoform X17 [Sus scrofa];>gi|545871450|ref|XP_005671412.1| PREDICTED: zinc finger protein 5	18	2	2	2	1.2	1.2	1.2	167.73	1491	1491;1491;1491;1491;1491;1491;1491;1491;1491;1491;1491;1491;1491;1491;1491;1491;1491;1491	0	10.551	140820	1983.3	382780	1	1				379	1547;1873	True;True	1612;1961	5299;6367	8476;10024	8476;10024
gi|75054313;gi|545857951;gi|545857948;gi|545857945;gi|545857942;gi|47523712;gi|218103017;gi|211637711;gi|18147001;gi|158065996;gi|157391365	gi|75054313;gi|545857951;gi|545857948;gi|545857945;gi|545857942;gi|47523712;gi|218103017;gi|211637711;gi|18147001;gi|158065996;gi|157391365	1;1;1;1;1;1;1;1;1;1;1	1;1;1;1;1;1;1;1;1;1;1	1;1;1;1;1;1;1;1;1;1;1	>gi|75054313|sp|Q8WNW3.1|PLAK_PIG RecName: Full=Junction plakoglobin;>gi|545857951|ref|XP_005668879.1| PREDICTED: junction plakoglobin isoform X4 [Sus scrofa];>gi|545857948|ref|XP_005668878.1| PREDICTED: junction plakoglobin isoform X3 [Sus scrofa];>gi|545	11	1	1	1	2.7	2.7	2.7	81.849	745	745;745;745;745;745;745;745;745;745;745;745	0	9.5916	62718	1458.6	170480	1	1				100	1440	True	1498	4911	7872	7872
gi|146345485;gi|113205806;gi|106647496;gi|545797472	gi|146345485;gi|113205806;gi|106647496;gi|545797472	1;1;1;1	1;1;1;1	1;1;1;1	>gi|146345485|sp|P06867.3|PLMN_PIG RecName: Full=Plasminogen; Contains: RecName: Full=Plasmin heavy chain A; Contains: RecName: Full=Activation peptide; Contains: RecName: Full=Plasmin heavy chain A, short form; Contains: RecName: Full=Plasmin light chain	4	1	1	1	1.2	1.2	1.2	90.614	809	809;809;809;810	0	7.0958	57292	1245.5	155730	1	1				32	763	True	798	2714	4346	4346
gi|44903507;gi|297632395;gi|190361519;gi|297632397;gi|294494645	gi|44903507;gi|297632395;gi|190361519;gi|297632397;gi|294494645	1;1;1;1;1	1;1;1;1;1	1;1;1;1;1	>gi|44903507|emb|CAF32801.1| high mobility group protein 1, partial [Sus scrofa];>gi|297632395|ref|NP_001172083.1| high mobility group protein HMG-I/HMG-Y isoform 1 [Sus scrofa];>gi|190361519|gb|ACE76956.1| high mobility group AT-hook 1 transcript variant	5	1	1	1	27.6	27.6	27.6	3.1305	29	29;96;96;107;107	0.0026596	6.2005	0	0	0	1	1				129	1750	True	1834	5941	9386	9386
gi|545868716;gi|194042870	gi|545868716;gi|194042870	1;1	1;1	1;1	>gi|545868716|ref|XP_005670655.1| PREDICTED: probable peptide chain release factor C12orf65 homolog, mitochondrial isoform X4 [Sus scrofa];>gi|194042870|ref|XP_001928322.1| PREDICTED: probable peptide chain release factor C12orf65 homolog, mitochondrial is	2	1	1	1	4	4	4	22.488	202	202;202	1	-2	0	0	0	1	1	+			138	1604	True	1676	5436	8669	8669	53	1
gi|571419;gi|2136547	gi|571419;gi|2136547	3;3	1;1	1;1	>gi|571419|gb|AAA67032.1| Ig heavy chain variable VDJ region, partial [Sus scrofa];>gi|2136547|pir||I47207 Ig heavy chain variable VDJ region - pig (fragment)	2	3	1	1	36	13.7	13.7	15.266	139	139;139	1	-2	0	0	0	1	1	+			155	389;1488;1535	False;True;False	405;406;1547;1600	1507;1508;1509;1510;1511;1512;1513;1514;1515;1516;1517;1518;1519;1520;5044;5200;5201;5202;5203;5204;5205;5206;5207;5208;5209;5210;5211;5212;5213;5214;5215;5216;5217;5218;5219;5220;5221;5222;5223;5224;5225;5226;5227;5228;5229;5230;5231;5232;5233;5234;5235;5236;5237;5238;5239;5240;5241;5242;5243;5244;5245;5246;5247;5248;5249;5250;5251;5252;5253;5254;5255;5256;5257;5258;5259;5260;5261;5262;5263;5264…	2398;2399;2400;2401;2402;2403;2404;2405;2406;2407;2408;2409;2410;2411;2412;2413;2414;2415;2416;2417;2418;2419;2420;2421;2422;2423;2424;2425;8068;8298;8299;8300;8301;8302;8303;8304;8305;8306;8307;8308;8309;8310;8311;8312;8313;8314;8315;8316;8317;8318;8319;8320;8321;8322;8323;8324;8325;8326;8327;8328;8329;8330;8331;8332;8333;8334;8335;8336;8337;8338;8339;8340;8341;8342;8343;8344;8345;8346;8347;8348…	2419;8068;8300	32	102
gi|350591618	gi|350591618	1	1	1	>gi|350591618|ref|XP_003132507.3| PREDICTED: serine/threonine-protein kinase ATR [Sus scrofa]	1	1	1	1	0.3	0.3	0.3	301.81	2644	2644	1	-2	0	0	0	1	1	+			274	1573	True	1640	5352	8543	8543	116	405
gi|545798684	gi|545798684	1	1	1	>gi|545798684|ref|XP_003121360.4| PREDICTED: protein MMS22-like [Sus scrofa]	1	1	1	1	0.7	0.7	0.7	118.52	1039	1039	0.0027397	6.4033	0	0	0	2	2				334	1743	True	1827	5927;5928	9368;9369	9368
gi|545807642	gi|545807642	1	1	1	>gi|545807642|ref|XP_003122865.3| PREDICTED: nuclear pore complex protein Nup160 [Sus scrofa]	1	1	1	1	0.5	0.5	0.5	166.27	1480	1480	0.0027322	6.3563	0	0	0	1	1				338	1420	True	1476	4864	7801	7801
gi|545813795;gi|545813792;gi|545813789;gi|545813786;gi|545813783;gi|545813780;gi|545813777	gi|545813795;gi|545813792;gi|545813789;gi|545813786;gi|545813783;gi|545813780;gi|545813777	1;1;1;1;1;1;1	1;1;1;1;1;1;1	1;1;1;1;1;1;1	>gi|545813795|ref|XP_005662052.1| PREDICTED: general transcription factor II-I isoform X7 [Sus scrofa];>gi|545813792|ref|XP_005662051.1| PREDICTED: general transcription factor II-I isoform X6 [Sus scrofa];>gi|545813789|ref|XP_005662050.1| PREDICTED: gener	7	1	1	1	5.5	5.5	5.5	30.484	274	274;958;977;978;979;998;999	1	-2	0	0	0	1	1	+			341	1613	True	1687	5551	8839	8839	126;127;128	21;27;33
gi|545823502	gi|545823502	1	1	1	>gi|545823502|ref|XP_005663594.1| PREDICTED: sperm-associated antigen 17-like [Sus scrofa]	1	1	1	1	2.4	2.4	2.4	58.742	508	508	1	-2	0	0	0	1	1	+			350	1233	True	1284	4194	6695	6695	142	321

## Sheet: Hoja1
	Trypsin
	Tetraspanins
	Heat Shock proteins
	Annexin
	Histone
	Endoplasmic retyculum
